# Supplementary material for: Selective cleavage of unactivated arene ring C–C bonds by iridium: key roles of benzylic C–H activation and metal–metal cooperativity
Source: Royal Society of Chemistry journal article supplement (doi:10.1039/d0sc05900e), 2021-01-01
Supplement: d0sc05900e1.pdf [file d0sc05900e1.pdf]

## Supporting information

# Selective cleavage of unactivated arene ring C-C bonds by iridium: key roles of benzylic C-H activation and metal-metal cooperativity

*Yancong Tian, Martin Jakoobi, Roman Boulatov\* and Alexey Sergeev\**

Department of Chemistry, University of Liverpool, Crown Street, Liverpool, L69 7ZD, UK

### Table of Contents

|                                                                                                                                    |      |
|------------------------------------------------------------------------------------------------------------------------------------|------|
| 1. General experimental details.....                                                                                               | S2   |
| 2. Experimental procedures and characterisation data .....                                                                         | S4   |
| 3. Preparation of $\eta^4$ -arene complexes 1, 1-d <sub>3</sub> , 1-d <sub>9</sub> , 39-41 .....                                   | S6   |
| 4. Thermolysis of $\eta^4$ -arene complexes 1, 1-d <sub>3</sub> , 1-d <sub>9</sub> , 39-41 .....                                   | S13  |
| 5. General procedure for kinetic measurements.....                                                                                 | S19  |
| 6.1 Determination of the rate law on complex 1 .....                                                                               | S21  |
| 6.2 Determination of the reaction order on mesitylene.....                                                                         | S23  |
| 5.3 Determination of activation parameters $\Delta H^\ddagger$ and $\Delta S^\ddagger$ .....                                       | S25  |
| 5.4 Measurement of kinetic isotope effects.....                                                                                    | S28  |
| 7. DFT Calculations.....                                                                                                           | S32  |
| 8. Kinetic modeling of thermolysis of complex 1 (0.1 M) at 50 °C (Fig. 1B) using<br>computed activation parameters (Fig. 2). ..... | S60  |
| 9. <sup>1</sup> H and <sup>13</sup> C NMR spectra.....                                                                             | S65  |
| 10. X-ray data for complexes 39 and 40 .....                                                                                       | S117 |
| 11. References.....                                                                                                                | S119 |

## 1. General experimental details

### Equipment and methods

All air-sensitive manipulations were conducted under an inert atmosphere using an argon-filled Innovative Technology glovebox or standard Schlenk technique under argon. All glassware was heated in an oven at 120 °C and cooled in an argon atmosphere prior to use.

NMR spectra were acquired on a Bruker Avance I (400 MHz) and Bruker Avance III HD (500 MHz) instruments at ambient temperature unless specified otherwise. Chemical shifts ( $\delta$ ) are reported in ppm.  $^1\text{H}$  NMR spectra are reported relative to the corresponding signals of residual protons in the deuterated solvents ( $\text{CF}_3\text{COOD}$ , TFA-d  $\delta$  11.50 ppm;  $\text{C}_6\text{D}_6$   $\delta$  7.16 ppm; THF- $d_8$   $\delta$  3.58 ppm;  $\text{C}_6\text{D}_{12}$  1.38 ppm).  $^{13}\text{C}$  NMR spectra were recorded with complete  $^1\text{H}$  decoupling and are reported relative to the following signals of deuterated solvents: TFA-d:  $\delta$  116.60 (q) ppm;  $\text{C}_6\text{D}_6$ :  $\delta$  128.06 ppm. The splitting patterns are designated as follows: s (singlet), br. s (broad singlet), d (doublet), dd (doublet of doublets), t (triplet), m (multiplet), br. m (broad multiplet).

Elemental analyses were performed by the Microanalysis Laboratory of the Department of Chemistry, University of Liverpool on a Thermo Flash EA 112 Series instrument.

Mass spectrometry analyses were conducted by the EPSRC UK National Mass Spectrometry Facility at Swansea University.  $[\text{Cp}^*\text{Ir}(\eta^6\text{-arene})][\text{BF}_4]_2$  complexes were sent to Swansea University in vials, whereas  $[\text{Cp}^*\text{Ir}(\eta^4\text{-arene})]$  and metallacycles were sent in ampulas sealed under argon or vacuum. Electrospray (ESI) and nano-Electrospray (nanoESI) ionization spectra were recorded on the OrbitrapXL; Electron Ionization (EI) spectra were recorded on the MAT95; Atmospheric Pressure Ionisation spectra (APCI) were recorded on the Xevo G2S using the Atmospheric Solids Analysis Probe (ASAP). All mass spectra (HRMS) were recorded in the positive mode.

### Solvents and reagents

*n*-Hexane was purchased from Sigma-Aldrich, distilled from sodium benzophenone ketyl and stored under argon in glovebox. Anhydrous benzene was purchased from Alfa Aesar and stored under argon in ChemSeal™ bottles. Acetone (Fisher), DCM and Et<sub>2</sub>O (both from Aldrich) were used without further purification.

D<sub>2</sub>O and DMSO-d<sub>6</sub> were purchased from Sigma-Aldrich; DMSO-d<sub>6</sub> was kept over 4Å molecular sieves. C<sub>6</sub>D<sub>6</sub> and C<sub>6</sub>D<sub>12</sub> were purchased from Cambridge Isotope Laboratories and were degassed by freeze-pump-thaw cycles and stored over 4Å molecular sieves under an argon atmosphere in Aldrich Sure/Stor™ flasks.

[Cp\*Ir(η<sup>4</sup>-mesitylene)] **1** was prepared using the corresponding literature procedure.<sup>1</sup> Cobaltocene (Acros) was used as received and stored in the glovebox freezer at -28 °C. AgBF<sub>4</sub> and PMe<sub>3</sub> were ordered from Strem and stored in a glovebox. Mesitylene (Fluka) and hexamethyldisiloxane (HMDSO, Sigma-Aldrich) were degassed and kept under argon. Naphthalene (Acros Organics), 2,6-dimethylnaphthalene (Aldrich), trifluoroacetic acid (TFA), trifluoroacetic anhydride (both from FluoroChem), NaH (60% dispersion in mineral oil; Sigma-Aldrich) and argon (Pureshield, BOC > 99.998%) were used as received.

## 2. Experimental procedures and characterisation data

### Mesitylene-d<sub>3</sub> (modified literature procedure)<sup>2</sup>

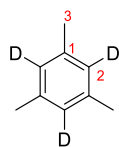

A 100 mL Schlenk bomb was evacuated and filled with argon, mesitylene (1.718 g, 14.29 mmol), trifluoroacetic anhydride (5.0 mL, 36 mmol), D<sub>2</sub>O (5.0 mL, 277 mmol) and was left to reflux at 101 °C for 18 h. CAUTION! Mixing trifluoroacetic anhydride and D<sub>2</sub>O is highly exothermic! The reaction mixture was cooled to room temperature, extracted with DCM (3x5 mL) and the combined extract was dried over Na<sub>2</sub>CO<sub>3</sub>. Removal of DCM under reduced pressure gave mesitylene with ca. 90% deuteration of the aromatic C-H protons. After repeating the deuteration procedure with the partially deuterated product and distillation (79 °C, 20 mbar), mesitylene-d<sub>3</sub> was obtained as a colourless liquid (397.9 mg, 3.229 mmol) with >99% D content at the three aromatic C-H positions.

<sup>1</sup>H NMR (400 MHz, C<sub>6</sub>D<sub>6</sub>): δ 2.29 (s, 9H, *H3*).

<sup>2</sup>H NMR (400 MHz, C<sub>6</sub>H<sub>6</sub>): δ 6.88 (s, 3D, *D2*).

HRMS (CI<sup>+</sup>, methane) *m/z*: calculated for [C<sub>9</sub>H<sub>10</sub>D<sub>3</sub>]<sup>+</sup> 124.1200, found 124.1204.

### Mesitylene-d<sub>9</sub> (modified literature procedure)<sup>3</sup>

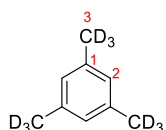

A 10 mL Schlenk bomb was evacuated and filled with argon, then charged with degassed mesitylene (1.40 mL, ca 10.0 mmol), DMSO-d<sub>6</sub> (2.00 mL), and NaH (206.0 mg of 60% dispersion in oil, 5.15 mmol) and was left to stir at 100 °C for 24 h. After cooling down the reaction mixture D<sub>2</sub>O (4.0 mL) was used to transfer suspension to extraction funnel. The aqueous layer was washed with Et<sub>2</sub>O (10 mL) and the combined organic layer was washed with H<sub>2</sub>O (5 ml) and dried using K<sub>2</sub>CO<sub>3</sub>. After removal of Et<sub>2</sub>O the deuterium exchange procedure was repeated 2 more times. Vacuum distillation (75 °C, 25 mbar) of the crude product afforded mesitylene-d<sub>9</sub> as a colourless liquid (140.1 mg) with >97% deuteration of the methyl groups.

<sup>1</sup>H NMR (400 MHz, C<sub>6</sub>D<sub>6</sub>): δ 6.81 (s, 3H, *H2*).

$^2\text{H}$  NMR (400 MHz,  $\text{C}_6\text{H}_6$ ):  $\delta$  2.27 (s, 9D,  $D_3$ ).

HRMS (CI+, methane)  $m/z$ : calculated for  $[\text{C}_9\text{H}_4\text{D}_9]^+$  130.1577, found 130.1574.

### 3. Preparation of $\eta^4$ -arene complexes 1, 1-d<sub>3</sub>, 1-d<sub>9</sub>, 39-41

$\eta^4$ -Arene iridium (I) complexes were prepared by a two step procedure involving the synthesis of intermediate  $\eta^6$ -arene iridium(III) complexes and their subsequent reduction.<sup>1</sup>

#### General procedure A for the preparation of $\eta^6$ -arene complexes<sup>1</sup>

A 20 mL vial was charged with [Cp\*IrCl<sub>2</sub>]<sub>2</sub> (100.0 mg, 0.1255 mmol), AgBF<sub>4</sub> (97.7 mg, 0.502 mmol) and a stir bar. Acetone (3 mL) was added and the resulting light-yellow suspension was stirred at room temperature for 15 minutes. Then the precipitate was filtered and washed with acetone (ca. 4 mL) until the washings became colourless. The combined filtrate and washings were evaporated to approximately 1 mL and 0.4 mL of the corresponding arene (ca. 4 eq. per Cp\*Ir fragment) was added. The reaction mixture was vigorously stirred at room temperature overnight and evaporated to dryness to give a beige solid. The crude product was dissolved in a minimal amount of trifluoroacetic acid (TFA) and precipitated with an excess of Et<sub>2</sub>O (10 mL). This procedure was repeated until the supernatant solution became colourless. Second crop of the product can be obtained from the TFA/Et<sub>2</sub>O mother liquor. After drying the product at 50 °C overnight under vacuum a white solid was obtained. If the solid turns light brown upon drying at elevated temperature, the compound should be redissolved in TFA, precipitated with Et<sub>2</sub>O and washed again.

#### General procedure B for the preparation of $\eta^6$ -arene complexes<sup>1</sup>

A 20 mL vial was charged with [Cp\*IrCl<sub>2</sub>]<sub>2</sub> (100.0 mg, 0.1255 mmol), AgBF<sub>4</sub> (97.7 mg, 0.502 mmol) and a stir bar. Acetone (3 mL) was added and the resulting light-yellow suspension was stirred at room temperature for 15 minutes. Then the precipitate was filtered and the precipitate was washed with acetone (ca. 4 mL) until the washings became colourless.

The combined filtrate and washings were evaporated to approximately 1 mL and transferred to argon filled Schlenk tube/flask. After evaporating the solution to residue, corresponding naphthalene derivative (ca 8 equiv.) and 0.4 mL of BF<sub>3</sub>·Et<sub>2</sub>O were added. Reaction mixture was

vigorously stirred at room temperature for 3 h and then evaporated to dryness. The crude mixture was dissolved in TFA and precipitated with Et<sub>2</sub>O in argon filled Schlenk tube. The Et<sub>2</sub>O layer was pipetted off, the white solid washed again with Et<sub>2</sub>O (5mL) and then dried under vacuum to give white solid. This process was repeated two or three times, until washings remained colourless. The TFA/Et<sub>2</sub>O mixtures can be used to collect second crop of product. After drying the product at 50 °C overnight under vacuum a white solid was obtained. If, however the solid turns brown during drying at elevated temperature, the compound should be redissolved in TFA, precipitated with Et<sub>2</sub>O and washed again.

$\eta^6$ -Complexes are rather poorly soluble in most organic solvents, and the most suitable solvent for recording NMR of these complexes is TFA. During NMR measurements in TFA-d the  $\eta^6$ -arene complexes may start to precipitate out.

### [Cp\*Ir( $\eta^6$ -mesitylene-d<sub>9</sub>)] [BF<sub>4</sub>]<sub>2</sub>

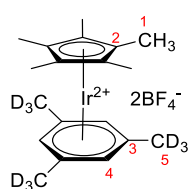

The complex was prepared according to General procedure A using [Cp\*IrCl<sub>2</sub>]<sub>2</sub> (125.2 mg, 0.1571 mmol), AgBF<sub>4</sub> (122.2 mg, 0.6277 mmol) and mesitylene-d<sub>9</sub> (122.1 mg, 0.9447 mmol). [Cp\*Ir( $\eta^6$ -mesitylene-d<sub>9</sub>)] [BF<sub>4</sub>]<sub>2</sub> was

isolated as white solid (126.6 mg, 0.2008 mmol) in 64% yield.

<sup>1</sup>H NMR (400 MHz, TFA-d):  $\delta$  7.13 (s, 3H, *H4*), 2.32 (s, 15H, *H1*).

<sup>2</sup>H NMR (400 MHz, TFA):  $\delta$  2.64 (s, 9D, *D5*).

Elemental analysis (%) calculated for C<sub>19</sub>H<sub>18</sub>D<sub>9</sub>IrB<sub>2</sub>F<sub>8</sub>: C 36.21, H 4.32; found C 35.45, H 4.18.

HRMS (nanoESI+) m/z: calculated for [<sup>191</sup>IrC<sub>19</sub>H<sub>18</sub>D<sub>9</sub>]<sup>2+</sup> 227.6136, found 227.6135.

### [Cp\*Ir( $\eta^6$ -mesitylene- $d_3$ )] [BF<sub>4</sub>]<sub>2</sub>

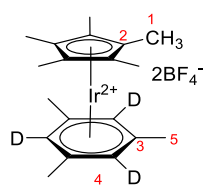

The complex was prepared according to General procedure A using [Cp\*IrCl<sub>2</sub>]<sub>2</sub> (100.6 mg, 0.1263 mmol), AgBF<sub>4</sub> (99.2 mg, 0.5096 mmol) and mesitylene- $d_3$  (115.1 mg, 0.9342 mmol). [Cp\*Ir( $\eta^6$ -mesitylene- $d_3$ )] [BF<sub>4</sub>]<sub>2</sub>

was isolated as white solid (152.9 mg, 0.2449 mmol) in 97% yield.

<sup>1</sup>H NMR (400 MHz, TFA- $d$ ):  $\delta$  2.65 (s, 9H, *H5*), 2.32 (s, 15H, *H1*).

<sup>2</sup>H NMR (400 MHz, TFA):  $\delta$  7.17 (br. s, 3D, *D4*).

Elemental analysis (%) calculated for C<sub>19</sub>H<sub>24</sub>D<sub>3</sub>IrB<sub>2</sub>F<sub>8</sub> : C 36.55, H 4.36; found C 35.81, H 4.11.

HRMS (nanoESI+) *m/z*: calculated for [<sup>191</sup>IrC<sub>19</sub>H<sub>24</sub>D<sub>3</sub>]<sup>+</sup> 448.1823, found 448.1826.

### [Cp\*Ir( $\eta^6$ -C<sub>6</sub>Me<sub>6</sub>)] [BF<sub>4</sub>]<sub>2</sub> (literature procedure)<sup>2</sup>

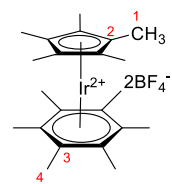

The complex was prepared according to published procedure using [Cp\*IrCl<sub>2</sub>]<sub>2</sub> (50.1 mg, 0.0629 mmol), TFA (0.75 mL) and C<sub>6</sub>Me<sub>6</sub> (50.2 mg, 0.309 mmol), which gave white solid (71.2 mg, 0.107 mmol) in 86% yield.

<sup>1</sup>H NMR (400 MHz, TFA- $d$ ):  $\delta$  2.46 (s, 18H, *H4*), 2.03 (s, 15H, *H1*). <sup>1</sup>H NMR is similar to the one published previously.<sup>4</sup>

<sup>13</sup>C NMR (100 MHz, TFA- $d$ ):  $\delta$  113.57 (*C2/C3*), 104.35 (*C3/C2*), 16.67 (*C4*), 8.83 (*C1*).

Elemental analysis (%) calculated for C<sub>22</sub>H<sub>33</sub>IrB<sub>2</sub>F<sub>8</sub> : C 39.84, H 5.01; found C 38.97, H 4.34.

HRMS (nanoESI+) *m/z*: calculated for [<sup>191</sup>IrClC<sub>22</sub>H<sub>33</sub>]<sup>2+</sup> 244.1089, found 244.1090.

### [Cp\*Ir( $\eta^6$ -naphthalene)] [BF<sub>4</sub>]<sub>2</sub>

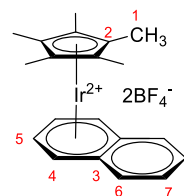

The complex was prepared according to General procedure B using [Cp\*IrCl<sub>2</sub>]<sub>2</sub> (90.1 mg, 0.113 mmol), AgBF<sub>4</sub> (88.1 mg, 0.453 mmol), naphthalene (101.0 mg, 0.7880 mmol), BF<sub>3</sub>·2H<sub>2</sub>O (0.5 mL) and was left to stir overnight.

[Cp\*Ir( $\eta^6$ -naphthalene)] [BF<sub>4</sub>]<sub>2</sub> was isolated as white solid (140.1 mg, 0.2227 mmol) in 99% yield.



$^1\text{H}$  NMR (400 MHz, TFA-d):  $\delta$  8.51 (dd, J 6.7, 3.1 Hz, 2H, *H4*), 8.22 (dd, J 4.3, 2.7 Hz, 2H, *H6*), 8.17 (J 6.6, 3.1 Hz, 2H, *H5*), 7.67 (dd, J 4.5, 2.6 Hz, 2H, *H7*), 2.22 (s, 15H, *H1*).  $^1\text{H}$  NMR spectrum is similar to  $\text{PF}_6$  salt published previously.<sup>5</sup>

$^{13}\text{C}$  NMR (100 MHz, TFA-d):  $\delta$  140.82 (*C3*, *C6* or *C7*), 128.32 (*C3*, *C6* or *C7*), 107.15 (*C3*, *C6* or *C7*), 106.45 (*C2*), 99.20 (*C4* or *C5*), 97.96 (*C5* or *C4*), 9.78 (*C1*).

Elemental analysis (%) calculated for  $\text{C}_{20}\text{H}_{23}\text{IrB}_2\text{F}_8$  : C 38.18, H 3.18; found C 37.87, H 3.33.

HRMS (nanoESI+)  $m/z$ : calculated for  $[\text{}^{191}\text{IrClC}_{20}\text{H}_{23}]^{2+}$  227.0697, found 227.0699.

### **$[\text{Cp}^*\text{Ir}(\eta^6\text{-2,6-dimethylnaphthalene})][\text{BF}_4]$**

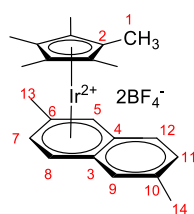

The complex was prepared according to the General procedure B using  $[\text{Cp}^*\text{IrCl}_2]_2$  (100.2 mg, 0.1257 mmol),  $\text{AgBF}_4$  (100.1 mg, 0.5142 mmol), 2-methylnaphthalene (78.2 mg, 0.500 mmol),  $\text{BF}_3 \cdot 2\text{H}_2\text{O}$  (0.3 mL) and was left to stir overnight.  $[\text{Cp}^*\text{Ir}(\eta^6\text{-2,6-dimethylnaphthalene})][\text{BF}_4]_2$  was isolated as vanilla white solid (111.8 mg, 0.17009 mmol) in 68% yield.

$^1\text{H}$  NMR (400 MHz, TFA-d):  $\delta$  8.16 (dd, J 8.9, 0.9 Hz, 1H, *H11*), 7.88 (d, J 6.9 Hz, 1H, *H8*), 7.87 (s, 1H, *H5*), 7.83 (d, J 8.9 Hz, 1H, *H12*), 7.71 (s, 1H, *H9*), 7.30 (d, J 6.8 Hz, 1H, *H7*), 2.80 (s, 3H, *H14*), 2.74 (s, 3H, *H13*), 1.98 (s, 15H, *H1*).

$^{13}\text{C}$  NMR (100 MHz, TFA-d):  $\delta$  155.05, 143.47, 128.24 (*C12*), 124.46 (*C9*), 115.28, 108.15, 105.55 (*C2*), 104.58, 99.41 (*C7*), 97.25, 97.02 (*C5*), 23.13 (*C14*), 19.16 (*C13*), 9.49 (*C1*).

Elemental analysis (%) calculated for  $\text{C}_{22}\text{H}_{27}\text{IrB}_2\text{F}_8$  : C 40.20, H 4.14; found C 39.86, H 4.02.

HRMS (EI+)  $m/z$ : calculated for  $[\text{}^{191}\text{IrC}_{22}\text{H}_{26}]^+$  481.1635, found 481.1631.

## General procedure for reduction of $\eta^6$ -arene complexes to $\eta^4$ -arene complexes

In a glovebox, a 20 ml screw cap vial was charged with  $[\text{Cp}^*\text{Ir}(\eta^4\text{-arene})][\text{BF}_4]_2$  (0.100 mmol),  $\text{Cp}_2\text{Co}$  (0.200 mmol), benzene (2.0 mL) and a magnetic stir bar. The vial was sealed and the reaction mixture was vigorously stirred for 2 h. *n*-Hexane (10-15 mL) was added to the resulting red-orange solution to precipitate out olive green  $[\text{Cp}_2\text{Co}][\text{BF}_4]$ . The suspension was filtered and the precipitate was washed with *n*-hexane (2x4 mL) until washings remained colorless. The combined filtrate and washings were evaporated in vacuum to give the product.

### $[\text{Cp}^*\text{Ir}(\eta^4\text{-mesitylene-d}_9)]$ (**1-d<sub>9</sub>**)

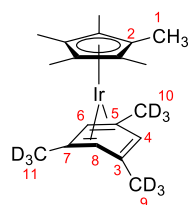

The complex was prepared according to the general procedure using  $[\text{Cp}^*\text{Ir}(\eta^6\text{-mesitylene-d}_9)][\text{BF}_4]_2$  (106.0 mg, 0.1682 mmol),  $\text{Cp}_2\text{Co}$  (63.4 mg, 0.335 mmol) and benzene (3.4 mL).  $[\text{Cp}^*\text{Ir}(\eta^4\text{-mesitylene-d}_9)]$  (**1-d<sub>9</sub>**) was isolated as orange-yellow solid (66.8 mg, 0.146 mmol) in 87% yield.

$^1\text{H}$  NMR (400 MHz,  $\text{C}_6\text{D}_6$ ):  $\delta$  5.39 (s, 1H, *H*6), 4.96 (d, *J* 1.9 Hz, 1H, *H*4), 2.67 (d, *J* 1.9 Hz, 1H, *H*8), 1.77 (s, 15H, *H*1).  $^1\text{H}$  NMR (400 MHz,  $\text{C}_6\text{D}_{12}$ ):  $\delta$  5.28 (s, 1H, *H*6), 4.52 (s, 1H, *H*4), 2.45 (d, *J* 1.2 Hz, 1H, *H*8), 1.83 (s, 15H, *H*1).

$^2\text{H}$  NMR (400 MHz,  $\text{C}_6\text{H}_6$ ):  $\delta$  2.01 (s, 3H, *D*11), 1.54 (s, 3H, *D*9), 1.25 (s, 3H, *D*10).

HRMS (ASAP) *m/z*: calculated for  $[\text{}^{191}\text{IrC}_{19}\text{H}_9\text{D}_9]^+$  456.2362, found 456.2362.

### $[\text{Cp}^*\text{Ir}(\eta^4\text{-mesitylene-d}_3)]$ (**1-d<sub>3</sub>**)

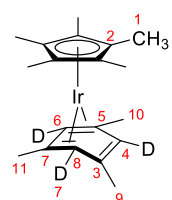

The complex was prepared according to the general procedure using  $[\text{Cp}^*\text{Ir}(\eta^6\text{-mesitylene-d}_3)][\text{BF}_4]_2$  (132.3 mg, 0.2119 mmol),  $\text{Cp}_2\text{Co}$  (80.0 mg, 0.423 mmol) and benzene (4.2 mL).  $[\text{Cp}^*\text{Ir}(\eta^4\text{-mesitylene-d}_3)]$  (**1-d<sub>3</sub>**) was isolated as yellow solid (74.8 mg, 0.166 mmol) in 78% yield.

$^1\text{H}$  NMR (400 MHz,  $\text{C}_6\text{D}_6$ ):  $\delta$  2.09 (s, 3H, *H11*), 1.77 (s, 15H, *H1*), 1.62 (s, 3H, *H9*), 1.33 (s, 3H, *H10*).  $^1\text{H}$  NMR (400 MHz,  $\text{C}_6\text{D}_{12}$ ):  $\delta$  2.07 (s, 3H, *H11*), 1.83 (s, 15H, *H1*), 1.34 (s, 3H, *H9*), 1.12 (s, 3H, *H10*).

$^2\text{H}$  NMR (400 MHz,  $\text{C}_6\text{H}_6$ ):  $\delta$  5.38 (s, 1D, *D6*), 4.96 (s, 1D, *D4*), 2.64 (s, 1D, *D8*).

HRMS (ASAP)  $m/z$ : calculated for  $[\text{}^{191}\text{IrC}_{19}\text{H}_{25}\text{D}_3]^+$  450.1985, found 450.1966; calculated for  $[\text{}^{193}\text{IrC}_{19}\text{H}_{25}\text{D}_3]^+$  452.2009, found 452.2016.

### **[Cp\*Ir( $\eta^4$ -C<sub>6</sub>Me<sub>6</sub>)] (39)**

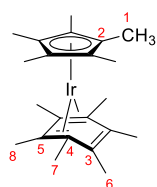

The complex was prepared according to the general procedure using  $[\text{Cp}^*\text{Ir}(\eta^6\text{-C}_6\text{Me}_6)][\text{BF}_4]_2$  (28.4 mg, 0.0428 mmol),  $\text{Cp}_2\text{Co}$  (15.4 mg, 0.0814 mmol) and DCM (1.0 mL).  $[\text{Cp}^*\text{Ir}(\eta^4\text{-C}_6\text{Me}_6)]$  was isolated as a pale-yellow solid (20.8 mg,

0.0425 mmol) in 99% yield. Single crystals were grown from  $\text{C}_6\text{H}_6$  using slow evaporation. Single crystals were grown from a benzene solution via slow evaporation.

$^1\text{H}$  NMR (400 MHz,  $\text{C}_6\text{D}_6$ ):  $\delta$  1.96 (s, 6H, *H8*), 1.66 (s, 15H, *H1*), 1.54 (s, 6H, *H6*), 1.42 (s, 6H, *H7*).

$^{13}\text{C}$  NMR (100 MHz,  $\text{C}_6\text{D}_6$ ):  $\delta$  132.96 (*C3*), 88.54 (*C2*), 79.61 (*C5*), 52.92 (*C4*), 20.09 (*C7*), 14.24 (*C6*), 14.05 (*C8*), 9.63 (*C1*).

HRMS (ASAP)  $m/z$ : calculated for  $[\text{}^{191}\text{IrC}_{22}\text{H}_{33}]^+$  488.2188, found 488.2186.

### **[Cp\*Ir( $\eta^4$ -naphthalene)] (40)**

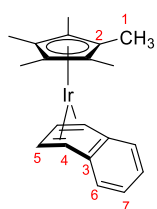

The complex was prepared according to the general procedure using  $[\text{Cp}^*\text{Ir}(\eta^6\text{-naphthalene})][\text{BF}_4]_2$  (67.3 mg, 0.107 mmol),  $\text{Cp}_2\text{Co}$  (40.4 mg, 0.214 mmol) and benzene (2.0 mL).  $[\text{Cp}^*\text{Ir}(\eta^4\text{-naphthalene})]$  was isolated as greenish-yellow crystals (39.2 mg, 0.0860 mmol) in 80% yield.

$^1\text{H}$  NMR (400 MHz,  $\text{C}_6\text{D}_6$ ):  $\delta$  6.83 (m, 2H, *H6*), 6.73 (m, 2H, *H7*), 5.59 (d,  $J$  4.7 Hz, 2H, *H5*), 3.48 (d,  $J$  4.3 Hz, 2H, *H4*), 1.76 (s, 1H, *H1*).

$^1\text{H}$  NMR (400 MHz,  $\text{CD}_2\text{Cl}_2$ ):  $\delta$  6.57-6.49 (m, 4H,  $H6+H7$ ), 5.66 (m, 2H,  $H5$ ), 3.40 (m, 2H,  $H4$ ), 1.98 (s, 15H,  $H1$ ).

$^{13}\text{C}$  NMR (100 MHz,  $\text{C}_6\text{D}_6$ ):  $\delta$  146.71 ( $C3$ ), 123.62 ( $C7$ ), 121.21 ( $C6$ ), 89.43 ( $C2$ ), 66.44 ( $C5$ ), 47.83 ( $C4$ ), 10.51 ( $C1$ ).

$^{13}\text{C}$  NMR (100 MHz,  $\text{CD}_2\text{Cl}_2$ ):  $\delta$  147.18 ( $C3$ ), 123.16 ( $C7$ ), 121.06 ( $C6$ ), 90.05 ( $C2$ ), 66.62 ( $C5$ ), 47.51 ( $C4$ ), 10.74 ( $C1$ ).

HRMS (ASAP)  $m/z$ : calculated for  $[\text{}^{191}\text{IrC}_{20}\text{H}_{24}]^+$  455.1484, found 455.1473.

### **$[\text{Cp}^*\text{Ir}(\eta^4\text{-2,6-dimethylnaphthalene)]$ (41)**

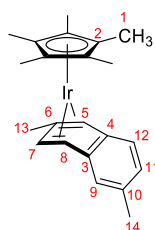

The complex was prepared according to the general procedure using  $[\text{Cp}^*\text{Ir}(\eta^6\text{-2,6-dimethylnaphthalene})][\text{BF}_4]_2$  (100.5 mg, 0.153 mmol),  $\text{Cp}_2\text{Co}$  (57.8 mg, 0.306 mmol) and benzene (3.0 mL).  $[\text{Cp}^*\text{Ir}(\eta^4\text{-2,6-dimethylnaphthalene})]$  was isolated as dark-orange-brown solid (68.2 mg, 0.141 mmol) in 92% yield.

$^1\text{H}$  NMR (400 MHz,  $\text{C}_6\text{D}_6$ ):  $\delta$  6.79 (d,  $J$  7.1 Hz, 1H,  $H12$ ), 6.66 (s, 1H,  $H9$ ), 6.52 (d,  $J$  7.1 Hz, 1H,  $H11$ ), 5.49 (d,  $J$  4.7 Hz, 1H,  $H7$ ), 3.44 (d,  $J$  4.8 Hz, 1H,  $H8$ ), 3.30 (s, 1H,  $H5$ ), 2.06 (s, 3H,  $H14$ ), 2.03 (s, 3H,  $H13$ ), 1.74 (s, 15H,  $H1$ ).

$^{13}\text{C}$  NMR (100 MHz,  $\text{C}_6\text{D}_6$ ):  $\delta$  147.20 ( $C3$ ), 144.92 ( $C4$ ), 131.96 ( $C10$ ), 124.02 ( $C11$ ), 122.36 ( $C9$ ), 120.60 ( $C12$ ), 89.00 ( $C2$ ), 78.89 ( $C6$ ), 68.82 ( $C7$ ), 50.37 ( $C5$ ), 47.72 ( $C8$ ), 21.24 ( $C14$ ), 19.64 ( $C13$ ), 10.26 ( $C1$ ).

HRMS (ASAP)  $m/z$ : calculated for  $[\text{}^{191}\text{IrC}_{22}\text{H}_{26}]^+$  481.1640, found 481.1624; calculated for  $[\text{}^{193}\text{IrC}_{22}\text{H}_{28}]^+$  485.1820, found 485.1820.

#### 4. Thermolysis of $\eta^4$ -arene complexes **1**, **1-d<sub>3</sub>**, **1-d<sub>9</sub>**, **39-41**

##### General procedure for arene ring C-C bond cleavage in [Cp\*Ir( $\eta^4$ -mesitylene-d<sub>n</sub>)] complexes

In a glovebox, a 4 mL vial was charged with a solution of [Cp\*Ir( $\eta^4$ -mesitylene-d<sub>n</sub>)] (0.100 mmol) in *n*-hexane (0.80 mL). The vial was sealed with a Teflon lined screw cap and taken outside of the glovebox. The reaction mixture was stirred in an oil bath at 50 °C. The resulting mixture was evaporated in vacuum at 50 °C to give the corresponding product as a solid.

##### Thermolysis of complex **1-d<sub>3</sub>** to give metallacycle **2-d<sub>3</sub>**

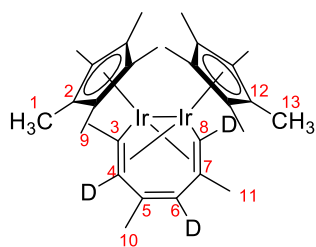

The reaction was conducted according to the general procedure using [Cp\*Ir( $\eta^4$ -mesitylene-d<sub>3</sub>)] **1-d<sub>3</sub>** (13.1 mg, 0.0291 mmol) and C<sub>6</sub>D<sub>12</sub> (520.2 mg, 0.583 ml to make a 0.050 M solution). The mixture was stirred at 50 °C (oil bath temperature) for 24 h and cooled to room

temperature. Evaporation of the resulting solution in vacuum gave **2-d<sub>3</sub>** as a sand-yellow solid (10.9 mg, 0.01401 mmol) in 96% yield.

<sup>1</sup>H NMR (500 MHz, C<sub>6</sub>D<sub>6</sub>):  $\delta$  2.69 (s, 3H, *H*9), 2.11 (s, 3H, *H*11), 2.01 (s, 3H, *H*10), 1.77 (s, 15H, *H*1 or *H*13), 1.73 (s, 15H, *H*13 or *H*1). <sup>1</sup>H NMR (400 MHz, C<sub>6</sub>D<sub>12</sub>):  $\delta$  2.43 (s, 3H, *H*9), 1.82 (s, 15H, *H*1 or *H*13), 1.80 (s, 15H, *H*13 or *H*1), 1.78 (s, 3H, *H*10 or *H*11), 1.66 (s, 3H, *H*11 or *H*10).

<sup>2</sup>H NMR (77 MHz, C<sub>6</sub>H<sub>6</sub>):  $\delta$  8.05 (s, 1D, *D*8), 5.16 (s, 1D, *D*4), 4.06 (s, 1D, *D*6).

HRMS (ASAP) *m/z*: calculated for [<sup>191</sup>Ir<sub>2</sub>C<sub>29</sub>D<sub>3</sub>H<sub>39</sub>]<sup>+</sup> 775.2687, found 775.2686.

## Thermolysis of complex **1-d<sub>9</sub>** to give metallacycle **2-d<sub>9</sub>**

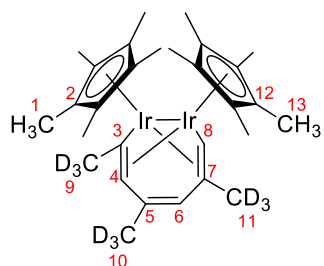

The reaction was conducted according to the general procedure using [Cp\*Ir( $\eta^4$ -mesitylene-**d<sub>9</sub>**)] (**1-d<sub>9</sub>**) (13.1 mg, 0.0287 mmol) and C<sub>6</sub>D<sub>12</sub> (519.9 mg, 0.464 ml to make a 0.050 M solution). The mixture was stirred at 50 °C (oil bath temperature) for 24 h and

cooled to room temperature. Evaporation of the resulting solution in vacuum gave **2-d<sub>9</sub>** as a brownish-yellow solid (10.3 mg, 0.0131 mmol) in 91% yield.

<sup>1</sup>H NMR (500 MHz, C<sub>6</sub>D<sub>6</sub>):  $\delta$  8.04 (s, 1H, *H*8), 5.17 (s, 1H, *H*6), 4.11 (d, *J* 1.4 Hz, 1H, *H*4), 1.77 (s, 15H, *H*1 or *H*13), 1.73 (s, 15H, *H*13 or *H*1). <sup>1</sup>H NMR (400 MHz, C<sub>6</sub>D<sub>12</sub>):  $\delta$  7.69 (s, 1H, *H*8), 4.63 (s, 1H, *H*6), 3.76 (d, *J* 1.0 Hz, 1H, *H*4), 1.82 (s, 15H, *H*2 or *H*12), 1.81 (s, 15H, *H*12 or *H*2).

<sup>2</sup>H NMR (77 MHz, C<sub>6</sub>H<sub>6</sub>):  $\delta$  2.12-1.95 (br. m, *D*9+*D*10+*D*11).

Due to lower deuterium content in the mesitylene-**d<sub>9</sub>** (compared to mesitylene-**d<sub>3</sub>**) the HRMS spectrum resolution was not sufficient for accurate mass measurement.

## Thermolysis of **1** in C<sub>6</sub>D<sub>6</sub> at 50 °C

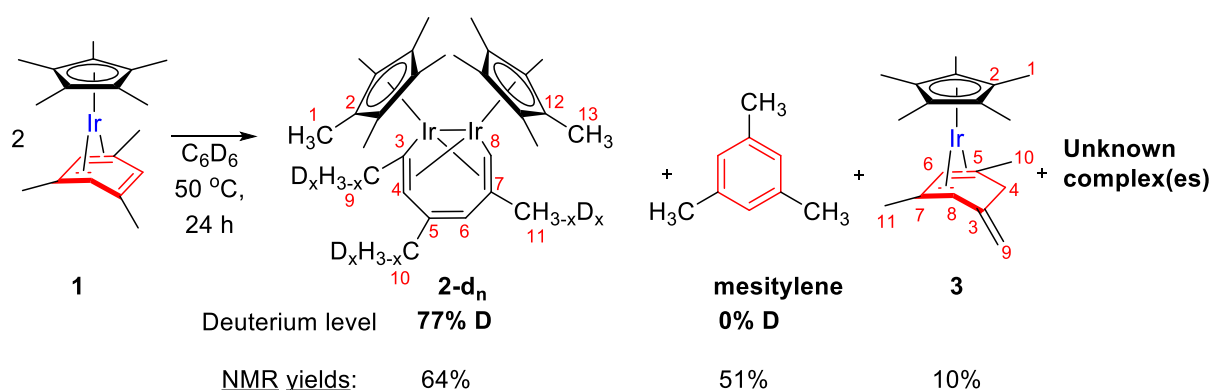

In a glovebox, a J. Young NMR tube was charged with a solution of **1** (15.2 mg, 0.0339 mmol) in C<sub>6</sub>D<sub>6</sub> (0.678 mL to make up a 0.050 M solution). The NMR tube was sealed, taken from the glovebox and heated in an oil bath at 50 °C for 24 h. The NMR tube was then removed from

the bath, cooled to room temperature and a proton NMR spectrum was recorded. The spectrum indicated the presence of **2-d<sub>n</sub>**, mesitylene, **3** as well as a number of unidentified species.

**Complex 2-d<sub>n</sub>:**

<sup>1</sup>H NMR (400 MHz, C<sub>6</sub>D<sub>6</sub>): δ 8.04 (s, 1H, *H8*), 5.17 (s, 1H, *H6*), 4.11 (d, J 1.3 Hz, 1H, *H4*), 2.69 (s, <1H, *H9*), 2.11 (s, <1H, *H11*), 2.00 (d, J 1.2 Hz, <1H, *H10*), 1.77 (s, 15H, *H1* or *H13*), 1.73 (s, 15H, *H13* or *H1*). See page S99-S103 for more detailed illustration of partial deuteration of Me-groups in **2-d<sub>n</sub>**.

**Minor product 3:**

<sup>1</sup>H NMR (400 MHz, C<sub>6</sub>D<sub>6</sub>): δ 4.95 (d, J 1.7 Hz, 1H, *H9*), 4.49 (d, J 1.6 Hz, 1H, *H9*), 2.90 (d, J 16.3 Hz, 1H, *H9*), 2.52 (d, J 16.5 Hz, 1H, *H9*). The remaining peaks *H6*, *H8*, *H10* and *H11* could not be unambiguously identified in this reaction mixture, as they had merged with other peaks in their corresponding region.

Note that when an alkane solvent (*n*-hexane, cyclohexane-d<sub>12</sub>) for thermolysis of **1** was replaced for THF, DCM, benzene, benzene-d<sub>6</sub>, toluene or mesitylene some side-products were formed, one of which is **3**. Complex **3** was originally identified upon thermolysis of **1** in d<sub>8</sub>-THF rather than in d<sub>6</sub>-benzene, because in the former solvent fewer overlaps with other signals were observed in a <sup>1</sup>H NMR spectrum. The tentative structural assignment of **3** was based on the similarity of <sup>1</sup>H and <sup>13</sup>C NMR spectra of **3** and known Fe(CO)<sub>3</sub>(mesitylene tautomer) complex.<sup>6</sup>

<sup>1</sup>H NMR (400 MHz, THF-d<sub>8</sub>): δ 4.45 (d, J 1.6 Hz, 1H, *H9*), 4.31 (s, 1H, *H6*), 3.97 (br. s, 1H, *H9*), 3.07 (s, 1H, *H8*), 2.51 (d, J 16.2 Hz, 1H, *H4*), 2.21 (d, J 16.1 Hz, 1H, *H4*), 1.89 (s, 15H, *H1*), 1.88 (s, 3H, *H11*), 1.26 (s, 3H, *H10*).

<sup>13</sup>C NMR (100 MHz, THF-d<sub>8</sub>): δ 155.43 (*C9*), 93.68 (*C3*), 89.17 (*C2*), 79.81 (*C7*), 70.8 (*C6*), 55.50 (*C8*), 48.28 (*C5*), 39.38 (*C4*), 25.39 (*C10*), 19.76 (*C11*), 10.07 (*C1*).

### Heating complex **2** in C<sub>6</sub>D<sub>6</sub> at 50 °C

In a glovebox, a J. Young NMR tube was charged with a solution of **2** (10.3 mg, 0.0132 mmol) in C<sub>6</sub>D<sub>6</sub> (500 μL). The NMR tube was sealed, taken outside of the glovebox and heated in an oil bath at 50 °C for 24 h, cooled to room temperature. <sup>1</sup>H NMR spectrum of the reaction mixture showed no detectable deuterium incorporation in **2** as the ratio of Me-group integrals and aromatic C-H integrals was 3:1 (compare with the complex **2-d<sub>n</sub>** where the ratio was <1:1).

### Thermolysis of **1** in the presence of 4 eq. of PMe<sub>3</sub> to give benzyl complex **4**.

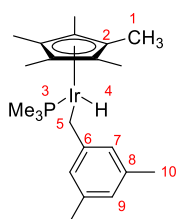

The thermolysis was conducted according to the general procedure using [Cp\*Ir(η<sup>4</sup>-mesitylene)] (**1**) (31.5 mg, 0.0704 mmol) and PMe<sub>3</sub> (21.4 mg, 0.281 mmol) in *n*-hexane (1.4 mL). The reaction mixture was stirred at 50 °C (heating block temperature) for 76 h. The resulting complex **4**, [Cp\*Ir(PMe<sub>3</sub>)(H)(3,5-dimethylbenzyl)], was isolated as a beige solid (36.8 mg, 0.0703 mmol) in 88% yield.

Alternatively, **4** can be obtained in 88% isolated yield after heating **1** at a higher temperature of 100 °C for 1 h.

<sup>1</sup>H NMR (400 MHz, C<sub>6</sub>D<sub>6</sub>): δ 7.20 (s, 2H, *H*7), 6.67 (s, 1H, *H*9), 3.12 (dd, *J* 10.7, 8.5 Hz, 1H, *H*5), 3.03 (dd, *J* 10.9, 3.2 Hz, 1H, *H*5), 2.32 (s, 6H, *H*10), 1.77 (d, *J*<sub>H-P</sub> 1.4 Hz, 15H, *H*1), 1.18 (d, *J*<sub>H-P</sub> 9.7, 9H, *H*3), -17.31 (d, *J*<sub>H-P</sub> 36.7 Hz, 1H, *H*4).

<sup>13</sup>C NMR (100 MHz, C<sub>6</sub>D<sub>6</sub>): δ 155.33 (d, *J*<sub>C-P</sub> 3.3 Hz, *C*6), 135.95 (*C*8), 127.99 (*C*7), 124.26 (*C*9), 91.84 (d, *J*<sub>C-P</sub> 3.5 Hz, *C*2), 21.75 (*C*10), 19.18 (d, *J*<sub>C-P</sub> 36.3 Hz, *C*3), 10.16 (*C*1), -7.46 (d, *J*<sub>C-P</sub> 6.6 Hz, *C*5).

<sup>31</sup>P NMR (162 MHz, C<sub>6</sub>D<sub>6</sub>): δ -45.25.

HRMS (ASAP) *m/z*: calculated for [<sup>191</sup>IrC<sub>22</sub>H<sub>35</sub>P]<sup>+</sup> 521.2082, found 521.2079.





#### **Attempted cleavage of [Cp\*Ir( $\eta^4$ -naphthalene)] (40)**

[Cp\*Ir( $\eta^4$ -naphthalene)] (27.6 mg, 0.0606 mmol) in *n*-hexane (0.50 mL) was heated at 150 °C (oil bath temperature) for 36 h. The reaction mixture was cooled to room temperature and evaporation in vacuum to give a brown amorphous solid (26.2 mg).

<sup>1</sup>H NMR spectrum indicated incomplete consumption of the starting complex and formation of naphthalene. Additionally, new broad signals were formed at  $\delta$  1.30-2.30 ppm. No signals characteristic for the previously reported products of metal insertion into the aromatic ring were observed at  $\delta$  4.00-8.10 ppm. According to HRMS data, the structure of main products agrees with [(Cp\*Ir)<sub>2</sub>(naphthalene)] and [(Cp\*Ir)<sub>3</sub>(naphthalene)].

HRMS (ASAP) m/z: calculated for [<sup>193</sup>Ir<sup>2</sup><sup>191</sup>IrC<sub>40</sub>H<sub>54</sub>]<sup>+</sup> 1111.3090, found for [(Cp\*Ir)<sub>3</sub>(naphthalene)+H] 1111.3091; calculated for [<sup>191</sup>Ir<sub>2</sub>C<sub>30</sub>H<sub>39</sub>]<sup>+</sup> 781.2264, found for [(Cp\*Ir)<sub>2</sub>(naphthalene)+H] 781.2250.

#### **Attempted cleavage of [Cp\*Ir( $\eta^4$ -2,6-dimethylnaphthalene)] (41)**

[Cp\*Ir( $\eta^4$ -2,6-dimethylnaphthalene)] (12.4 mg, 0.0256 mmol) in *n*-hexane (0.3 mL) was heated at 150 °C (oil bath temperature) for 24 h of heating in an oil bath. Evaporation of the resulting solution in vacuum gave a brown residue (10.2 mg).

<sup>1</sup>H NMR spectrum of the residue indicated complete consumption of the starting complex and formation of 2,6-dimethylnaphthalene. Additionally, new broad signals appeared at  $\delta$  1.30-2.20 ppm. No signals characteristic for the previously reported products of metal insertion into the aromatic ring were observed at  $\delta$  4.00-8.10 ppm.

HRMS (ASAP and EI<sup>+</sup>) failed to give fragments corresponding to the expected product

## 5. General procedure for kinetic measurements

### Preparation of stock solution of C<sub>6</sub>D<sub>12</sub> with hexamethyldisiloxane (HMDSO) as standard

In a glovebox, HMDSO (26  $\mu$ L, 0.12 mmol) was added to C<sub>6</sub>D<sub>12</sub> (5000  $\mu$ L) to prepare a stock solution for thermolysis reactions of **1** and its deuterated analogues. In between various experiments the stock solution was kept in a glovebox freezer.

### Measurement of <sup>1</sup>H NMR spectra for all kinetic experiments

- 1) At the designated times, the NMR tube was taken from the oil bath and frozen in liquid N<sub>2</sub>, washed with DCM to remove oil and then frozen in liquid N<sub>2</sub> again.
- 2) The sample was then warmed to room temperature, wiped clean and measured at room temperature (16 scans, d1=5 s) three times for each time point.
- 3) After the measurement, the sample was frozen again and before continuing thermolysis at specific temperature the sample was warmed to room temperature.

### Analysis of <sup>1</sup>H NMR data

- 1) After the measurements were done for a specific experiment the data analysis was done using Bruker TopSpin program.
- 2) All the spectra were referenced to 0.09 ppm (the chemical shift of HMDSO in C<sub>6</sub>D<sub>12</sub>) and baseline correction was applied.
- 3) For all the aromatic C-H protons of the starting material and the product specific integral regions were defined and these were applied on all the spectra using **multi\_integ3** command to obtain text file containing all the integration data.
- 4) The integrals were then exported to Excel to calculate the concentration of starting material at any given time.

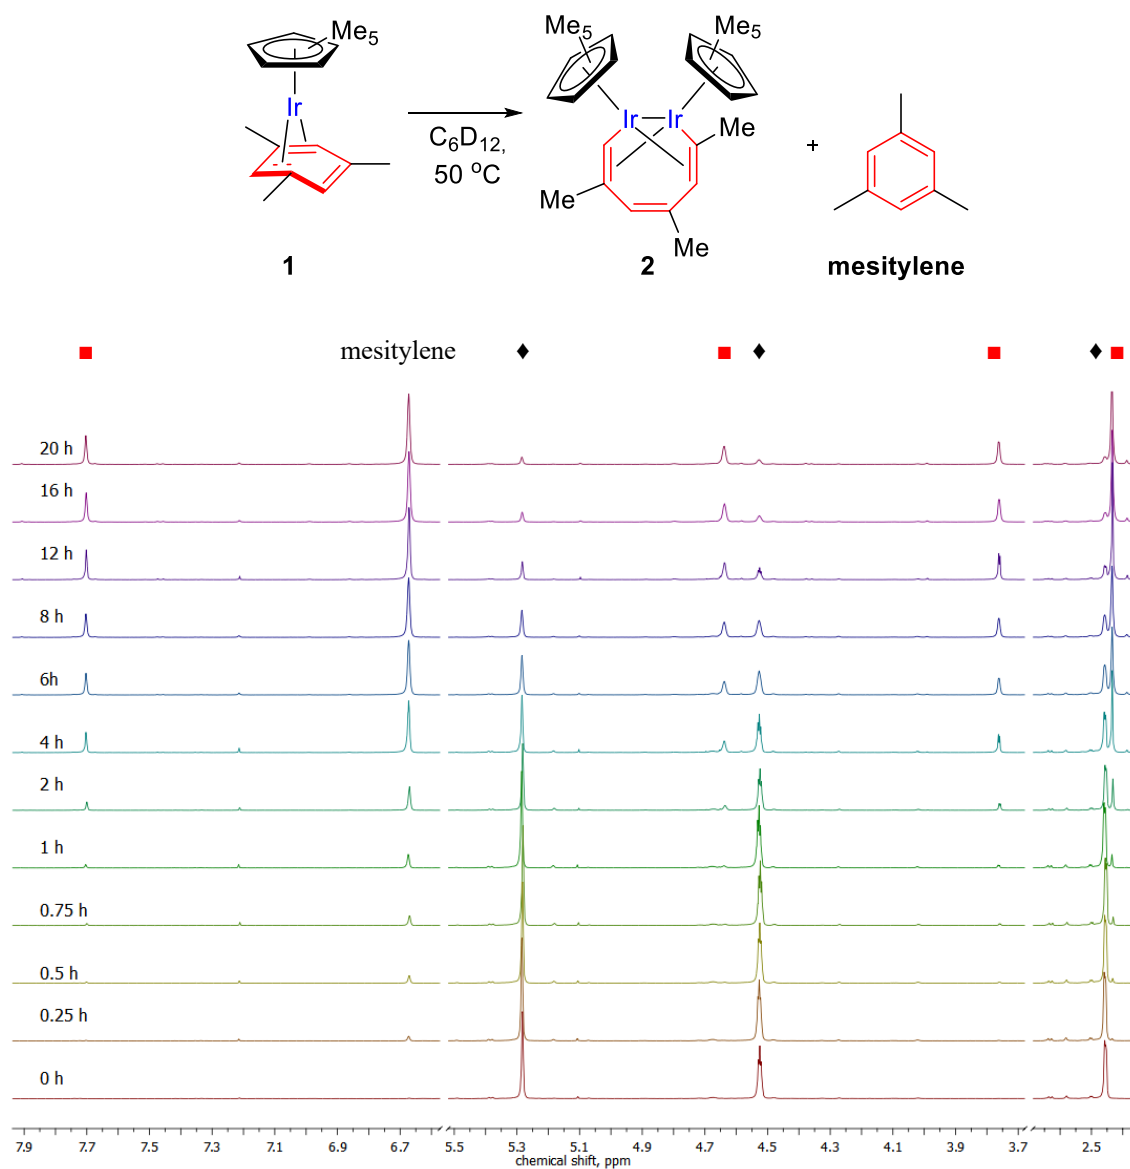

**Figure S1.**  $^1\text{H}$  NMR (400 MHz,  $25\text{ }^\circ\text{C}$ ,  $C_6D_{12}$ ) spectra of a typical kinetic experiment on thermolysis of **1** at  $50\text{ }^\circ\text{C}$ . The C-H peaks corresponding to **1** and **2** are labelled as  $\blacklozenge$  and  $\blacksquare$  respectively.

## 6.1 Determination of the rate law on complex 1

In a glovebox, an NMR tube was charged with  $\eta^4$ -arene complex **1** (2.6-22.4 mg, 0.0058-0.0500 mmol) and then a stock solution (500-567  $\mu\text{L}$ ) of  $\text{C}_6\text{D}_{12}$  containing internal standard (HMDSO) was added to prepare a 0.010-0.050 M solution of **1**. The tube was attached to an NMR tube evacuation adapter, taken out of the glovebox, frozen in liquid  $\text{N}_2$ , flame sealed under vacuum, warmed to room temperature and then fully immersed into an oil bath at 50  $^\circ\text{C}$ . After the designated time interval, the NMR tube was taken out of the bath and  $^1\text{H}$  NMR spectra were recorded as described in the general procedure.

**Table S1.** Concentration-time data for thermolysis of **1** at 50  $^\circ\text{C}$  at starting concentrations of **1** in the range of 0.01- 0.1 M.<sup>a</sup>

| Time, s | c( <b>1</b> ), M |         |         |         |         |
|---------|------------------|---------|---------|---------|---------|
| 0       | 0.010232         | 0.02528 | 0.05059 | 0.07449 | 0.09904 |
| 900     | 0.009876         | 0.02412 | 0.04882 | 0.07102 | 0.09444 |
| 1800    | 0.009355         | 0.02306 | 0.04687 | 0.06869 | 0.09106 |
| 2700    | 0.008974         | 0.02225 | 0.04439 | 0.06512 | 0.08643 |
| 3600    | 0.008553         | 0.02125 | 0.04226 | 0.06161 | 0.08173 |

a) The measurement were performed during the 1<sup>st</sup> hour of the reaction when conversion was less than 18%.

**Table S2.** Initial rates for thermolysis of **1** at various starting concentrations of **1** (0.01- 0.1 M) at 50  $^\circ\text{C}$ .<sup>a</sup>

| c( <b>1</b> ), M | Initial rate $k_{\text{int}}^{\text{b}}$ , $\text{s}^{-1}$ | Error margin for $k^{\text{c}}$ , $\text{s}^{-1}$ | $\ln c$   | $\ln k_{\text{int}}$ | Error margin for $\ln k_{\text{int}}^{\text{d}}$ |
|------------------|------------------------------------------------------------|---------------------------------------------------|-----------|----------------------|--------------------------------------------------|
| 0.010232         | $4.73418 \cdot 10^{-7}$                                    | $1.42098 \cdot 10^{-8}$                           | -4.582182 | -14.563              | 0.03001                                          |
| 0.025286         | $1.10422 \cdot 10^{-6}$                                    | $3.93542 \cdot 10^{-8}$                           | -3.677494 | -13.716              | 0.03564                                          |
| 0.050598         | $2.33861 \cdot 10^{-6}$                                    | $7.89104 \cdot 10^{-8}$                           | -2.983838 | -12.965              | 0.03374                                          |
| 0.074498         | $3.51869 \cdot 10^{-6}$                                    | $1.33381 \cdot 10^{-7}$                           | -2.596977 | -12.557              | 0.03791                                          |
| 0.099040         | $4.73428 \cdot 10^{-6}$                                    | $1.44887 \cdot 10^{-7}$                           | -2.312230 | -12.260              | 0.03060                                          |

a) The thermolysis was conducted in the absence of added mesitylene. b) The initial rates were obtained from the linear plot of c(**1**) vs. time (0-1 h). c) Errors margins correspond to the standard uncertainty and were obtained the from linear least-squares analyses of the data using LINEST function in Excel. d) Errors margins correspond to the standard deviation of  $\ln k$ .

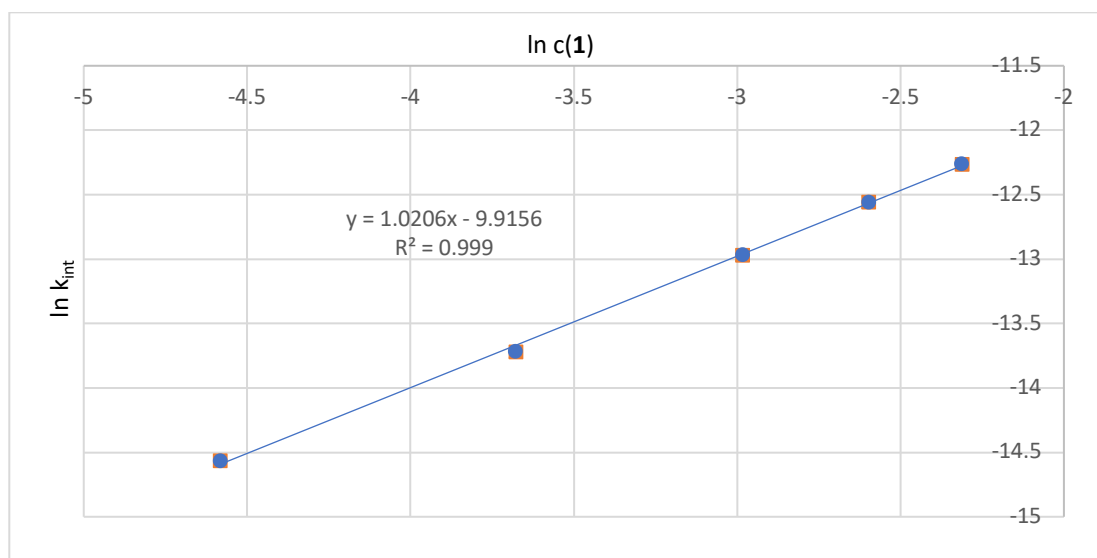

**Figure S2.** Determination of the order on  $\eta^4$ -mesitylene complex **1** by calculating the slope of the line  $\ln k_{\text{int}}$  vs  $\ln c(\mathbf{1})$ . The slope of 1 suggests the reaction is 1<sup>st</sup> order on **1**.

## 6.2 Determination of the reaction order on mesitylene

In a glovebox, an NMR tube was charged with  $\eta^4$ -arene complex **1** (11.1 mg, 0.0248 mmol), mesitylene (7-34  $\mu$ L) and the appropriate amount of stock solution of  $C_6D_{12}$  containing internal standard (HMDSO) to obtain 0.050 M solution of **1**. The tube was attached to an NMR tube evacuation adapter, taken out of the glovebox, frozen in liquid  $N_2$ , flame sealed under vacuum, warmed to room temperature and then fully immersed into an oil bath at 50 °C. After the designated time interval, the NMR tube was taken out of the bath and  $^1H$  NMR spectra were recorded as described in the general procedure.

**Table S3.** Concentration-time data for thermolysis of **1** (0.050 M) at various starting concentrations of mesitylene  $c(\text{Mes})$  (0.01- 0.1 M) at 50 °C.<sup>a</sup>

| Time, s | $c(\mathbf{1})$ , M    |                        |                        |                        |                        |
|---------|------------------------|------------------------|------------------------|------------------------|------------------------|
|         | $c(\text{Mes})=0.10$ M | $c(\text{Mes})=0.21$ M | $c(\text{Mes})=0.31$ M | $c(\text{Mes})=0.40$ M | $c(\text{Mes})=0.50$ M |
| 0       | 0.050023               | 0.050390               | 0.050283               | 0.049812               | 0.049311               |
| 900     | 0.047863               | 0.047511               | 0.048140               | 0.047692               | 0.047228               |
| 1800    | 0.046194               | 0.046172               | 0.046402               | 0.045791               | 0.045581               |
| 2700    | 0.043948               | 0.044471               | 0.044671               | 0.043712               | 0.043414               |
| 3600    | 0.041338               | 0.042403               | 0.042536               | 0.040596               | 0.040624               |

a) The initial kinetics were measured during the 1<sup>st</sup> hour of the reaction when conversion reached  $\leq 18\%$ .

**Table S4.** Initial rates for thermolysis of **1** at various starting concentrations of mesitylene (0.01- 0.1 M) at 50 °C.

| $c(\text{Mes})$<br>M | Initial rate $k_{\text{int}}^a$ , s <sup>-1</sup> | Error margin for $k_{\text{int}}^b$ , s <sup>-1</sup> | $\ln c_0(\text{Mes})$ | $\ln k_{\text{int}}$ | Error margin for $\ln k_{\text{int}}^c$ |
|----------------------|---------------------------------------------------|-------------------------------------------------------|-----------------------|----------------------|-----------------------------------------|
| 0.102346             | $2.33861 \cdot 10^{-6}$                           | $1.01873 \cdot 10^{-7}$                               | -2.279398             | -<br>12.96595        | 0.03002                                 |
| 0.207493             | $2.11274 \cdot 10^{-6}$                           | $1.47433 \cdot 10^{-7}$                               | -1.572659             | -<br>13.06752        | 0.03564                                 |
| 0.309147             | $2.1069 \cdot 10^{-6}$                            | $5.19296 \cdot 10^{-8}$                               | -1.173939             | -<br>13.07030        | 0.03374                                 |
| 0.403316             | $2.49017 \cdot 10^{-6}$                           | $1.42913 \cdot 10^{-7}$                               | -0.908034             | -12.9032             | 0.03791                                 |
| 0.496516             | $2.35428 \cdot 10^{-6}$                           | $1.26631 \cdot 10^{-7}$                               | -0.700140             | -<br>12.95928        | 0.03060                                 |

a) The initial rates were obtained from the linear plot of  $c(\mathbf{1})$  vs. time (0-1 h). b) Error margins correspond to the standard uncertainty and were obtained from linear least-squares analyses of the data using LINEST function in Excel. c) Error margins correspond to the standard deviation of  $\ln k_{\text{int}}$ .

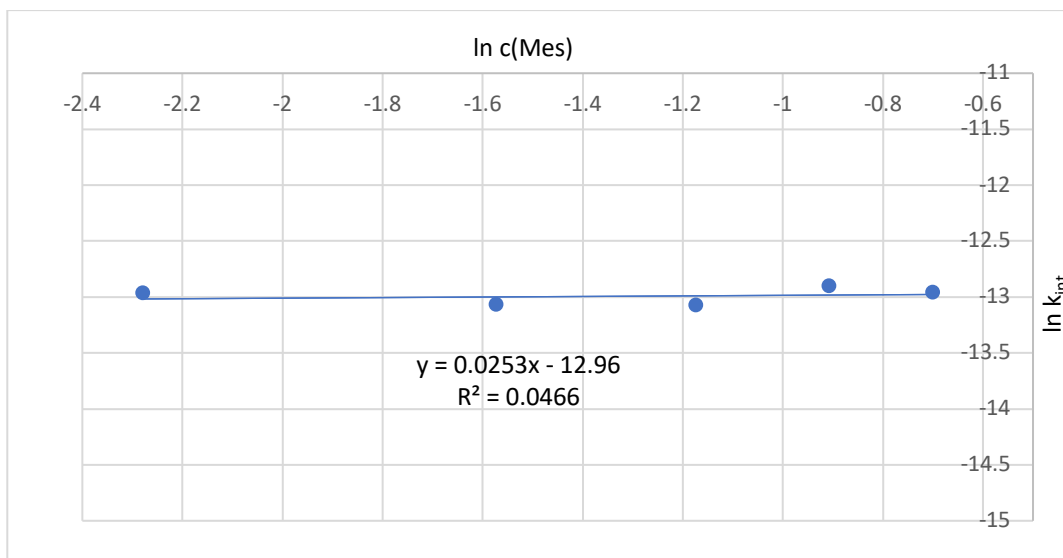

**Figure S3.** Determination of the order on mesitylene by calculating the slope of the line  $\ln k_{\text{int}}$  vs  $\ln c(\text{Mes})$  (Table S4). The slope of 0 suggests 0<sup>th</sup> order on mesitylene.



### 5.3 Determination of activation parameters $\Delta H^\ddagger$ and $\Delta S^\ddagger$

In a glovebox, an NMR tube was charged with  $\eta^4$ -arene complex **1** (11.1 mg, 0.0248 mmol) and a stock solution (500  $\mu$ L) of  $C_6D_{12}$  containing internal standard (HMDSO) to obtain 0.05 M solution of **1**. The tube was attached to an NMR tube evacuation adapter, taken out of the glovebox, frozen in liquid  $N_2$ , flame sealed under vacuum, warmed to room temperature and then fully immersed into an oil bath at 40, 50, 60, 70 or 80  $^\circ C$ . After the designated time interval, the NMR tube was taken out of the bath and  $^1H$  NMR spectra were recorded as described in the general procedure.

**Table S5.** Concentration-time data for thermolysis of **1** ( $c=0.05$  M) at 40, 50, 60, 70 and 80  $^\circ C$ .

| Time, s | c( <b>1</b> ), M | Time, s | c( <b>1</b> ), M |               |               | Time, s | c( <b>1</b> ), M |
|---------|------------------|---------|------------------|---------------|---------------|---------|------------------|
|         | 40 $^\circ C$    |         | 50 $^\circ C$    | 60 $^\circ C$ | 70 $^\circ C$ |         | 80 $^\circ C$    |
| 0       | 0.049628         | 0       | 0.050598         | 0.050667      | 0.051764      | 0       | 0.051511         |
| 1800    | 0.048750         | 900     | 0.048830         | 0.042575      | 0.034945      | 600     | 0.026361         |
| 3600    | 0.047426         | 1800    | 0.046871         | 0.036585      | 0.023396      | 1200    | 0.014906         |
| 7200    | 0.045852         | 2700    | 0.044439         | 0.031453      | 0.015419      | 1800    | 0.008170         |
| 14400   | 0.042850         | 3600    | 0.042270         | 0.027615      | 0.011100      | 2400    | 0.004684         |
| 21600   | 0.040405         | 7200    | 0.032408         | 0.016130      | 0.003630      | 3000    | 0.002918         |
| 28800   | 0.038466         | 14400   | 0.021521         | 0.006621      | 0.000460      |         |                  |
| 115200  | 0.018792         | 21600   | 0.014956         | 0.002537      |               |         |                  |
| 201600  | 0.010132         | 28800   | 0.009952         | 0.001614      |               |         |                  |

**Table S6.** Determining the activation parameters of (**1**,  $c=0.050$  M) in the temperature range of 40-80  $^\circ C$ .<sup>a</sup>

| T, $^\circ C$ | T, K | Rate constant k, $s^{-1a}$ | Error margin for k, $s^{-1b}$ | 1/T ( $K^{-1}$ ) | ln(k/T)    | Error margin for ln(k/T) |
|---------------|------|----------------------------|-------------------------------|------------------|------------|--------------------------|
| 40            | 313  | $7.899 \cdot 10^{-6}$      | $1.12002 \cdot 10^{-7}$       | 0.003195         | -17.495020 | 0.01418                  |
| 50            | 323  | $5.731 \cdot 10^{-5}$      | $8.77247 \cdot 10^{-7}$       | 0.003096         | -15.544715 | 0.03126                  |
| 60            | 333  | $1.398 \cdot 10^{-4}$      | $4.37218 \cdot 10^{-6}$       | 0.003003         | -14.683100 | 0.02104                  |
| 70            | 343  | $4.331 \cdot 10^{-4}$      | $9.11083 \cdot 10^{-6}$       | 0.002915         | -13.582314 | 0.01850                  |
| 80            | 353  | $9.945 \cdot 10^{-4}$      | $1.83958 \cdot 10^{-5}$       | 0.002833         | -12.779778 | 0.01418                  |

a) The rates were obtained from the linear plot of  $c(\text{Mes})$  vs. time. b) Errors margins correspond to the standard uncertainty and were obtained the from linear least-squares analyses of the data using LINEST function in Excel. c) Errors margins correspond to the standard deviation of  $\ln(k/T)$ .

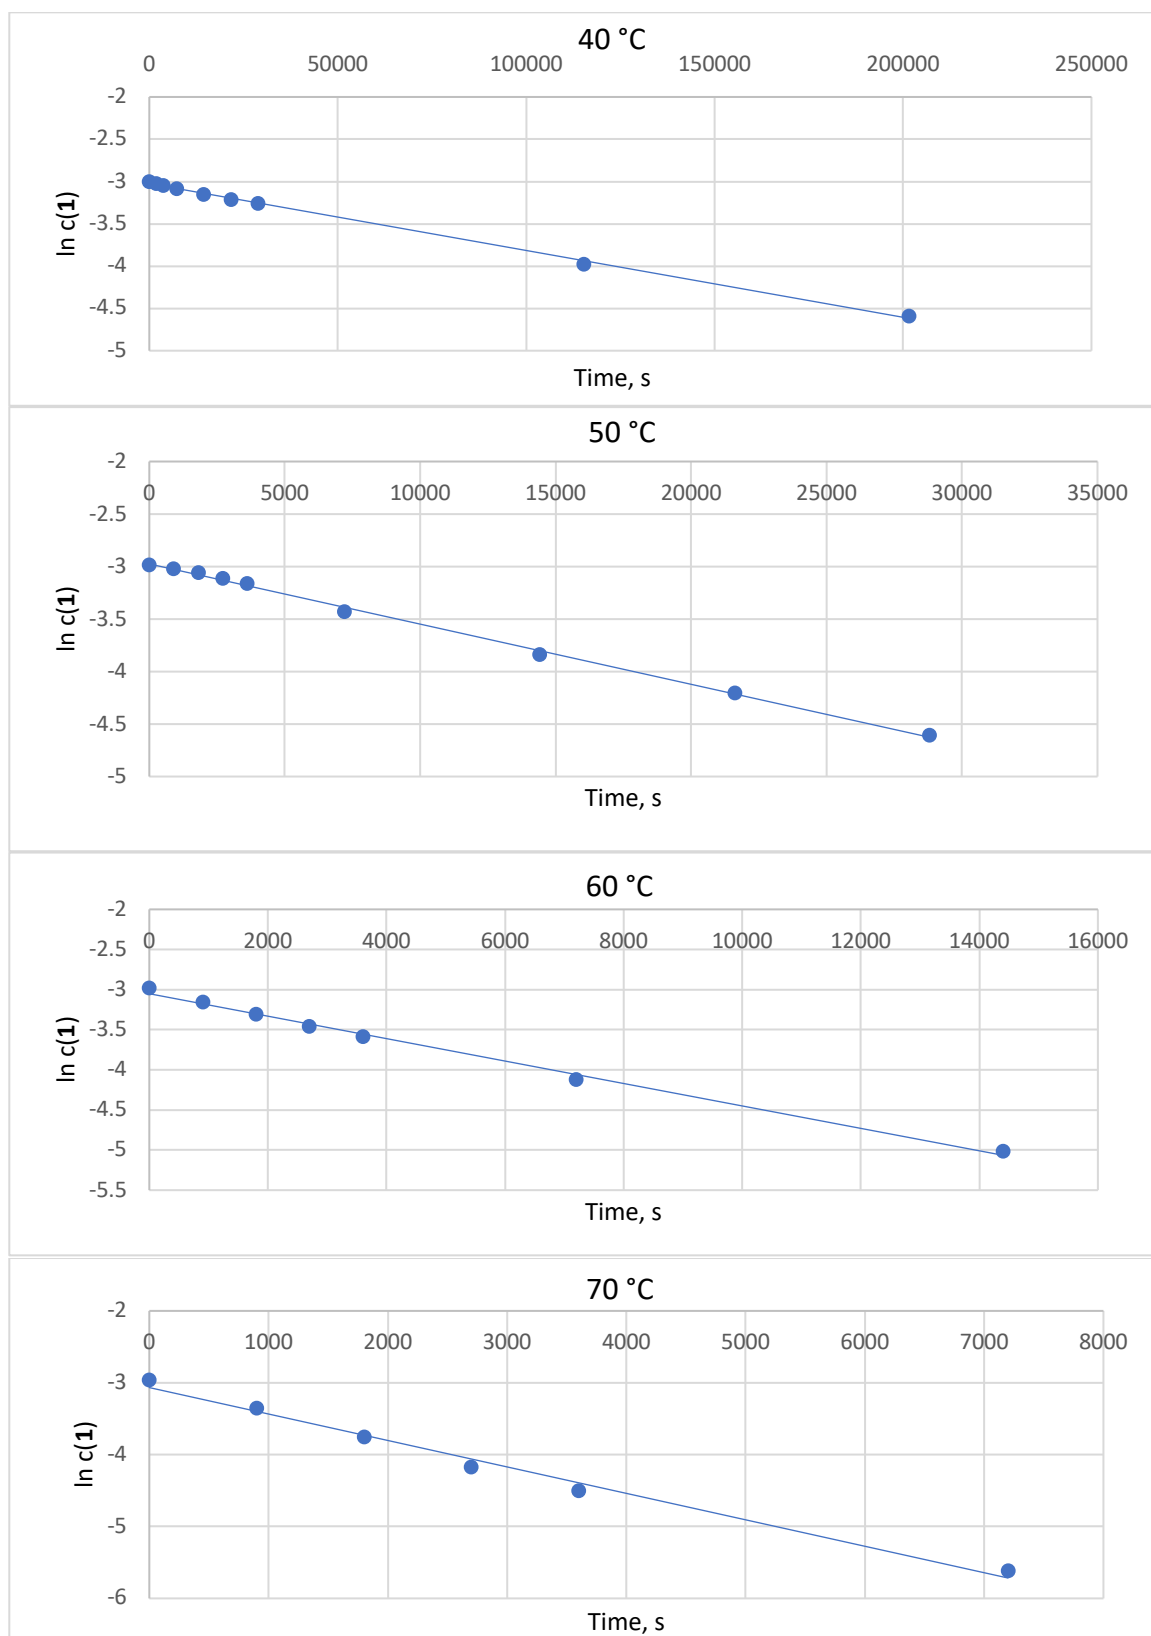

**Figure S4.** Plot of  $\ln c$  vs time for thermolysis of **1** at different temperatures (40-80 °C). See also next page.

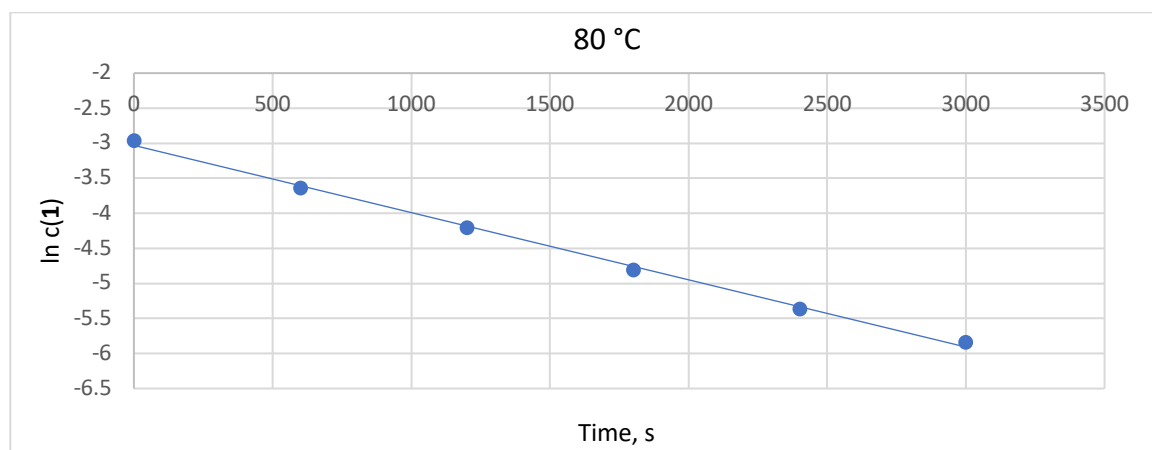

**Figure S4 (continued).** Plot of  $\ln c$  vs time for thermolysis of **1** at different temperatures (40-80 °C).

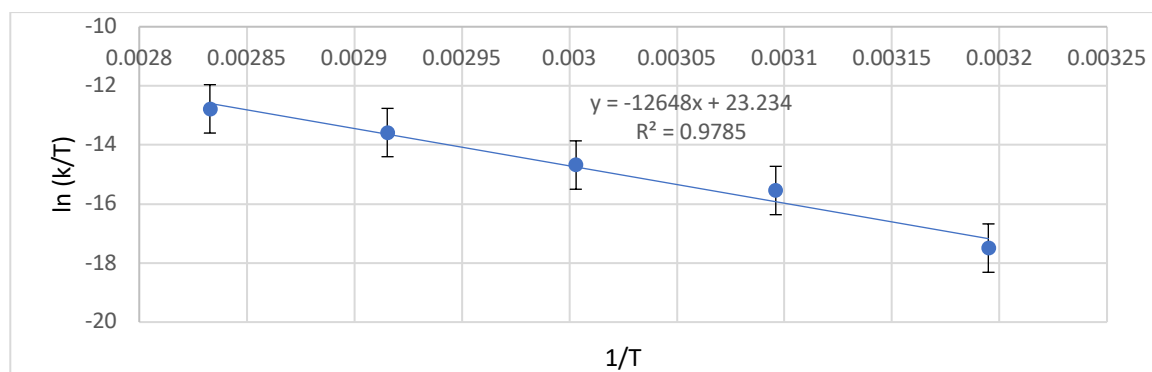

**Figure S5.** An Eyring plot for determining the activation parameters  $\Delta H^\ddagger$  and  $\Delta S^\ddagger$  for thermolysis of **1** at 40-80 °C.

**Table S7.** Activation parameters for thermolysis of **1**.<sup>a</sup>

| $\Delta H^\ddagger$ , kcal/mol | $\Delta S^\ddagger$ , cal/(mol·K) | $\Delta G_{323}^\ddagger$ , kcal/mol |
|--------------------------------|-----------------------------------|--------------------------------------|
| $25.1 \pm 2.1$                 | $-1.0 \pm 6.5$                    | $25.4 \pm 3.0$                       |

a) Kinetic activation parameters were obtained from the linear Eyring plots of  $\ln(k_i/T)$  vs.  $1/T$  (**Fig. S5**). Errors margins correspond to the standard uncertainty and were the from linear least-squares analyses of the data using LINEST function in Excel.

## 5.4 Measurement of kinetic isotope effects

In a glovebox, an NMR tube was charged with  $\eta^4$ -arene complex **1-d<sub>3</sub>** (13.0 mg, 0.0288 mmol) or **1-d<sub>9</sub>** (13.0 mg 0.0285 mmol) and a stock solution (573  $\mu$ L for **1-d<sub>3</sub>** and 560  $\mu$ L for **1-d<sub>9</sub>**) of  $C_6D_{12}$  containing internal standard (HMDSO) to obtain 0.050 M solution of **1-d<sub>3</sub>** or **1-d<sub>9</sub>**. The tube was attached to an NMR tube evacuation adapter, taken out of the glovebox, frozen in liquid  $N_2$ , flame sealed under vacuum, warmed to room temperature and then fully immersed into an oil bath at 50 °C. After the designated time interval, the NMR tube was taken out of the bath and  $^1H$  NMR spectra were recorded as described in the general procedure.

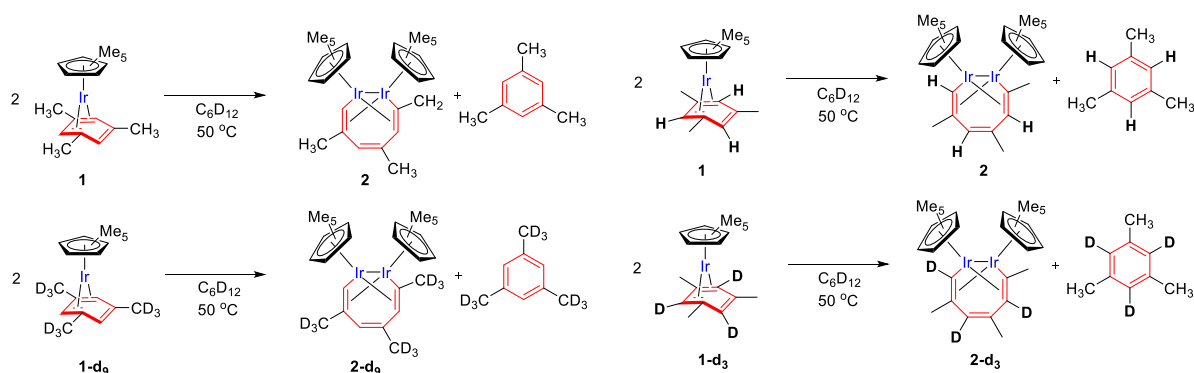

**Table S8.** Concentration-time data for thermolysis **1**, **1-d<sub>3</sub>** and **1-d<sub>9</sub>** at 50 °C.<sup>a</sup>

| Time, s | c( <b>1</b> ), M |         |         | c( <b>1-d<sub>3</sub></b> ), M |         |         | c( <b>1-d<sub>9</sub></b> ), M |         |         |
|---------|------------------|---------|---------|--------------------------------|---------|---------|--------------------------------|---------|---------|
|         | run 1a           | run 2a  | run 3a  | run 1b                         | run 2b  | run 3b  | run 1c                         | run 2c  | run 3c  |
| 0       | 0.05029          | 0.05093 | 0.05056 | 0.05082                        | 0.04992 | 0.04962 | 0.05082                        | 0.04992 | 0.04962 |
| 900     | 0.04859          | 0.04910 | 0.04878 | 0.04911                        | 0.04808 | 0.04791 | 0.04911                        | 0.04808 | 0.04791 |
| 1800    | 0.04662          | 0.04680 | 0.04717 | 0.04712                        | 0.04652 | 0.04613 | 0.04712                        | 0.04652 | 0.04613 |
| 2700    | 0.04412          | 0.04485 | 0.04434 | 0.04490                        | 0.04388 | 0.04374 | 0.04490                        | 0.04388 | 0.04374 |
| 3600    | 0.04224          | 0.04269 | 0.04186 | 0.04287                        | 0.04221 | 0.04179 | 0.04287                        | 0.04221 | 0.04179 |

a) The measurements were performed during the 1<sup>st</sup> hour of the reaction when conversion was less than 18%.

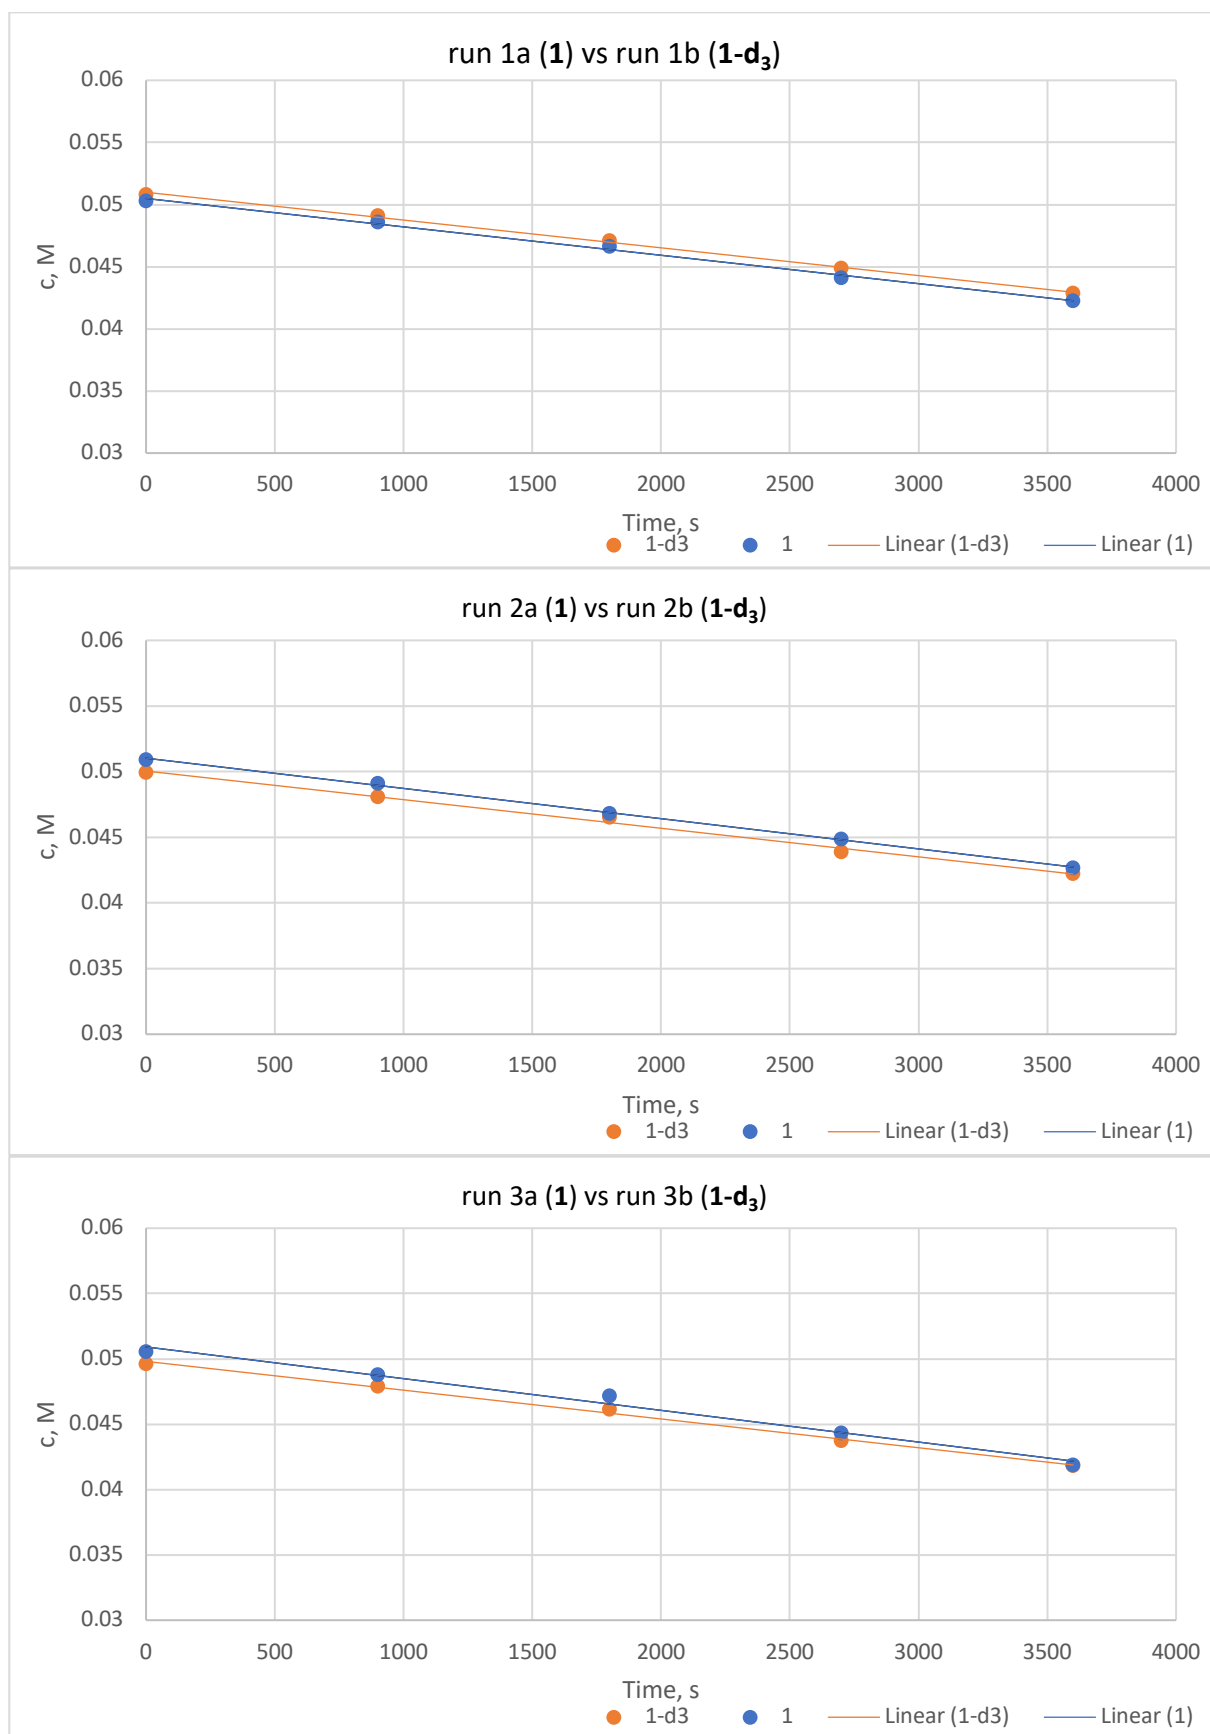

**Figure S9.** Concentration-time plots for three pairs of thermolysis experiments with of  $\eta^4$ -mesitylene **1** and  $\eta^4$ -mesitylene- $d_3$  **1-d<sub>3</sub>** complexes at 50 °C (data from Table S8).

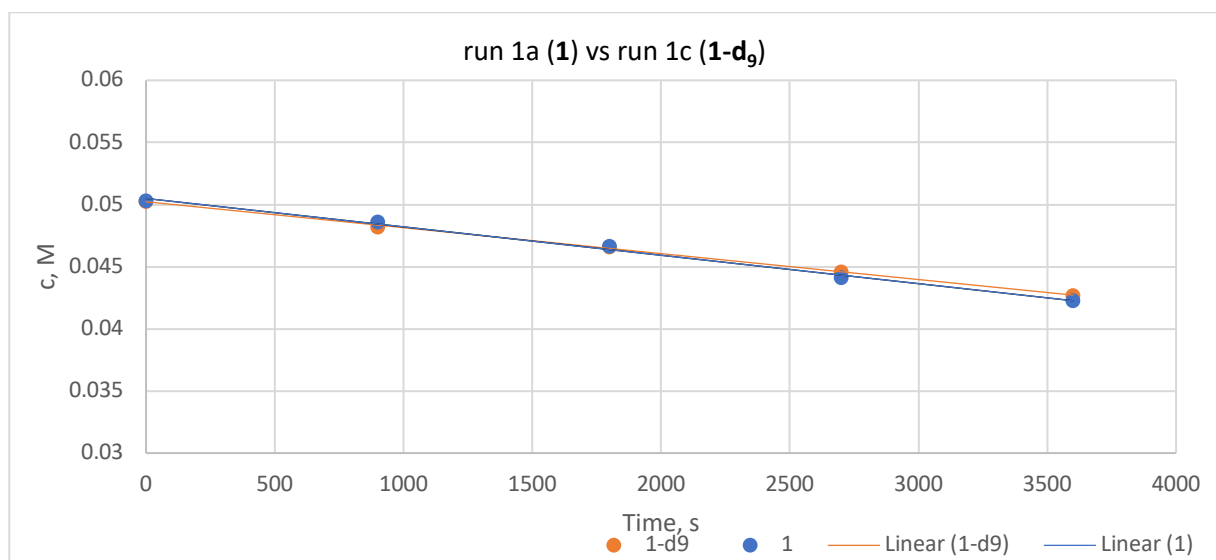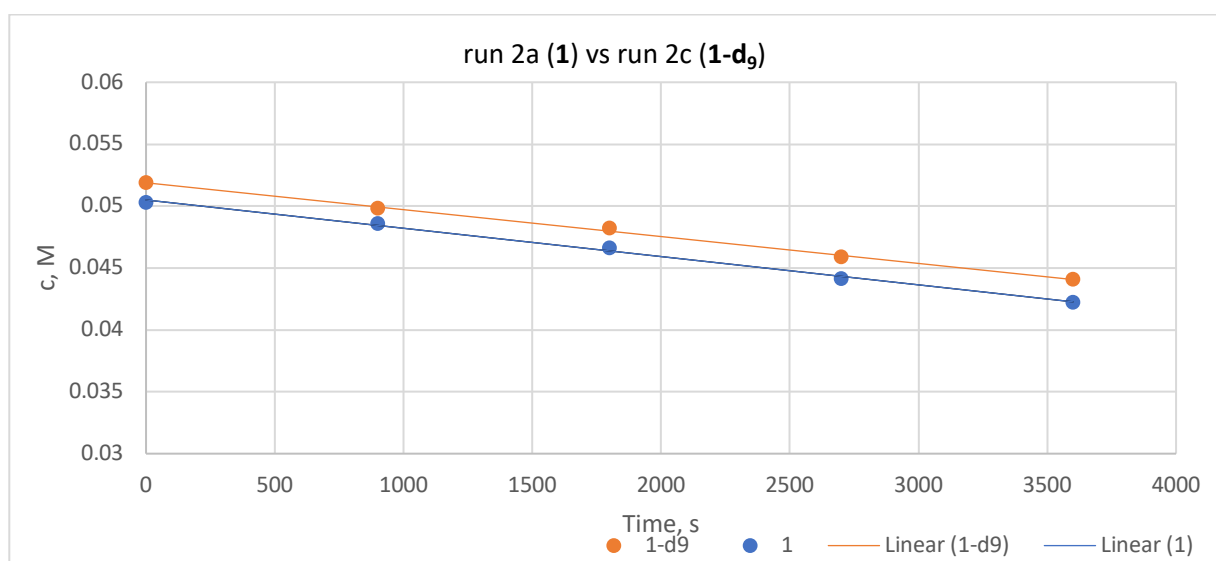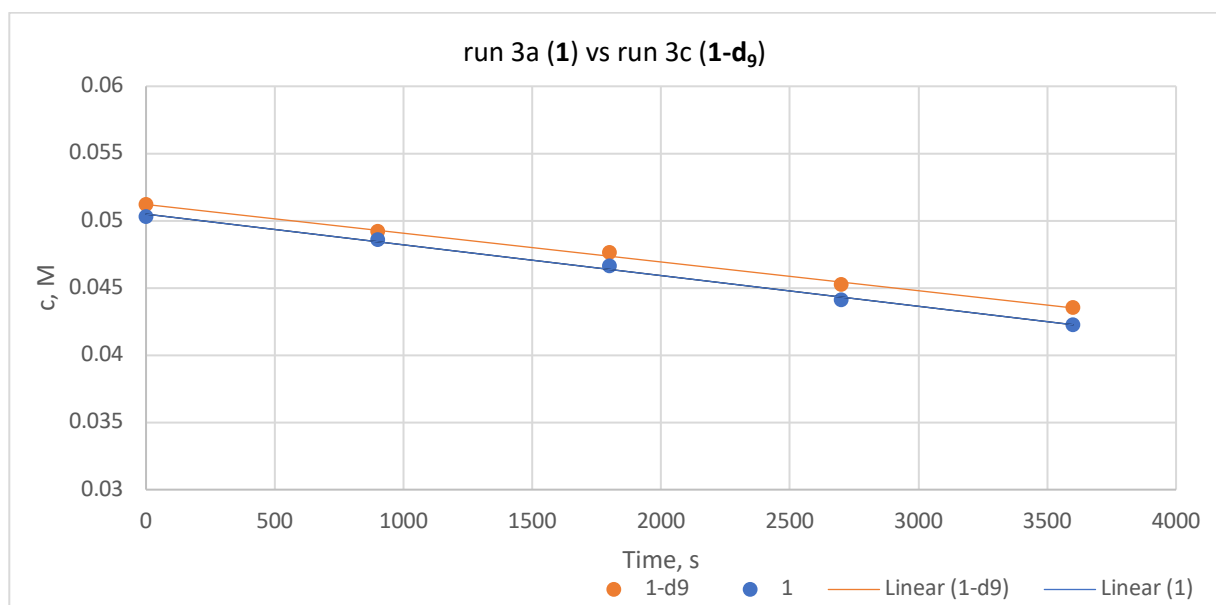

**Figure S10.** Concentration-time plots for three pairs of thermolysis experiments with of  $\eta^4$ -mesitylene **1** and  $\eta^4$ -mesitylene- $d_9$  **1-d<sub>9</sub>** complexes at 50 °C (data from Table S8).

**Table S9.** Determination of KIE(1/1-d<sub>3</sub>) and KIE(1/1-d<sub>9</sub>) using data from Figs. S9 and S10.

|                                                                                          | run 1                   | run 2                   | run 3                   |
|------------------------------------------------------------------------------------------|-------------------------|-------------------------|-------------------------|
| Initial rate $k_{\text{int}}(\mathbf{1})$ , s <sup>-1</sup>                              | $2.28559 \cdot 10^{-6}$ | $2.30309 \cdot 10^{-6}$ | $2.42699 \cdot 10^{-6}$ |
| Initial rate $k_{\text{int}}(\mathbf{1-d}_3)$ , s <sup>-1</sup>                          | $2.23494 \cdot 10^{-6}$ | $2.17811 \cdot 10^{-6}$ | $2.20325 \cdot 10^{-6}$ |
| Initial rate $k_{\text{int}}(\mathbf{1-d}_9)$ , s <sup>-1</sup>                          | $2.08679 \cdot 10^{-6}$ | $2.17168 \cdot 10^{-6}$ | $2.13801 \cdot 10^{-6}$ |
| KIE(1/1-d <sub>3</sub> ) = $k_{\text{int}}(\mathbf{1}) / k_{\text{int}}(\mathbf{1-d}_3)$ | 1.02 <sub>2</sub>       | 1.05 <sub>7</sub>       | 1.10 <sub>1</sub>       |
| KIE(1/1-d <sub>9</sub> ) = $k_{\text{int}}(\mathbf{1}) / k_{\text{int}}(\mathbf{1-d}_9)$ | 1.09 <sub>5</sub>       | 1.06 <sub>0</sub>       | 1.13 <sub>5</sub>       |

KIE(1/1-d<sub>3</sub>) = 1.06 ± 0.09 (95% confidence interval)

KIE(1/1-d<sub>9</sub>) = 1.09 ± 0.09 (95% confidence interval)

## 7. DFT Calculations

All geometry optimizations, analytical frequency calculations and intrinsic reaction path calculations were with the B3LYP<sup>7</sup> functional in gas phase and a mixed basis set of LanL2DZ for iridium and 6-31G(d) for other atoms. Stabilities of converged wavefunctions were confirmed by running the “stable” test. Analytical frequency calculations confirmed that all converged minima contained 0 and all converged transition-state geometries contained exactly 1 imaginary frequency. IRCs calculations established all minima connected to each transition-state geometry. Single point energies of all converged geometries were calculated with the M06-L<sup>8</sup> functional and mixed basis set of LanL2TZ for the rhodium atom and 6-311+G(d) for the rest of other atoms. The solvent effects were included in single point energy calculations using the conductor polarizable continuum model (CPCM). The free energies were calculated by adding single-point energies calculated at the M06-L/(6-311+G(d)+LANL2TZ) level to thermodynamic corrections calculated in the rigid-rotor/ideal gas/quasi-harmonic approximations.<sup>9</sup> The effectiveness of using B3LYP for structure optimization followed by single point energy calculations with the M06 suit of functionals<sup>10</sup> and the suitability of B3LYP and M06-L for calculations of barrier heights involving Ir-C and C-C bond formations were reported previously.<sup>11</sup> All DFT calculations were performed with Gaussian 09.<sup>12</sup>

**Table S10.** Electronic activation ( $E_a$ ) and reaction ( $E_r$ ) energies (kcal/mol) for selected elementary steps and the overall transformation at B3LYP-D3/def2SVP and B3LYP/(6-31G(d)+LANL2DZ).

| Reaction     | B3LYP-D3/def2SVP |       | B3LYP/(6-31G(d)+LANL2DZ) |       |
|--------------|------------------|-------|--------------------------|-------|
|              | $E_a$            | $E_r$ | $E_a$                    | $E_r$ |
| <b>1→6</b>   | 19.5             | 15.7  | 22.5                     | 16.8  |
| <b>6→7</b>   | 2.1              |       | 1.1                      |       |
| <b>8→9</b>   | 21.4             |       | 23.4                     |       |
| <b>2x1→2</b> |                  | -31.7 |                          | -32.5 |



**Figure S11.** The full calculated mechanism and the corresponding free energy diagram of C-C cleavage in  $[\text{Cp}^*\text{Ir}(\eta^4\text{-mesitylene})]$  complex **1** through *syn* diiridium intermediates. All free energies are relative to 2 moles of **1**, at M06-L/(6-311+G(d)+LANL2TZ)//B3LYP/(6-31G(d)+LANL2DZ), 1 M concentrations and 50 °C. Whenever necessary to maintain the constant atomic composition, the energy states include, in addition to the species specified by its number, a mole of **1** or a mole of mesitylene.

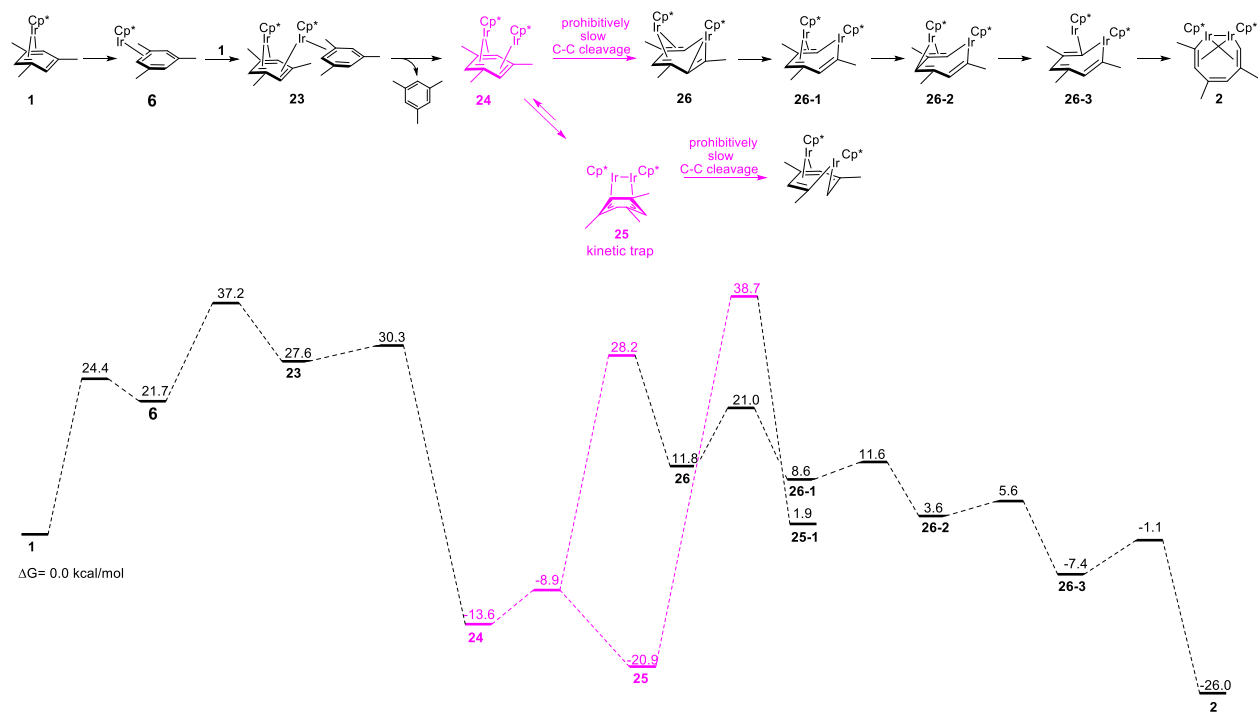

**Figure S12.** The calculated reaction mechanisms and the corresponding free energy diagram of C-C cleavage in  $[\text{Cp}^*\text{Ir}(\eta^4\text{-benzene})]$  complex **5**. All free energies are relative to 2 moles of **5**, at M06-L/(6-311+G(d)+LANL2TZ)//B3LYP/(6-31G(d)+LANL2DZ), 1 M concentrations and 50 °C. Whenever necessary to maintain the constant atomic composition, the energy states include, in addition to the species specified by its number, a mole of **5** or a mole of benzene.

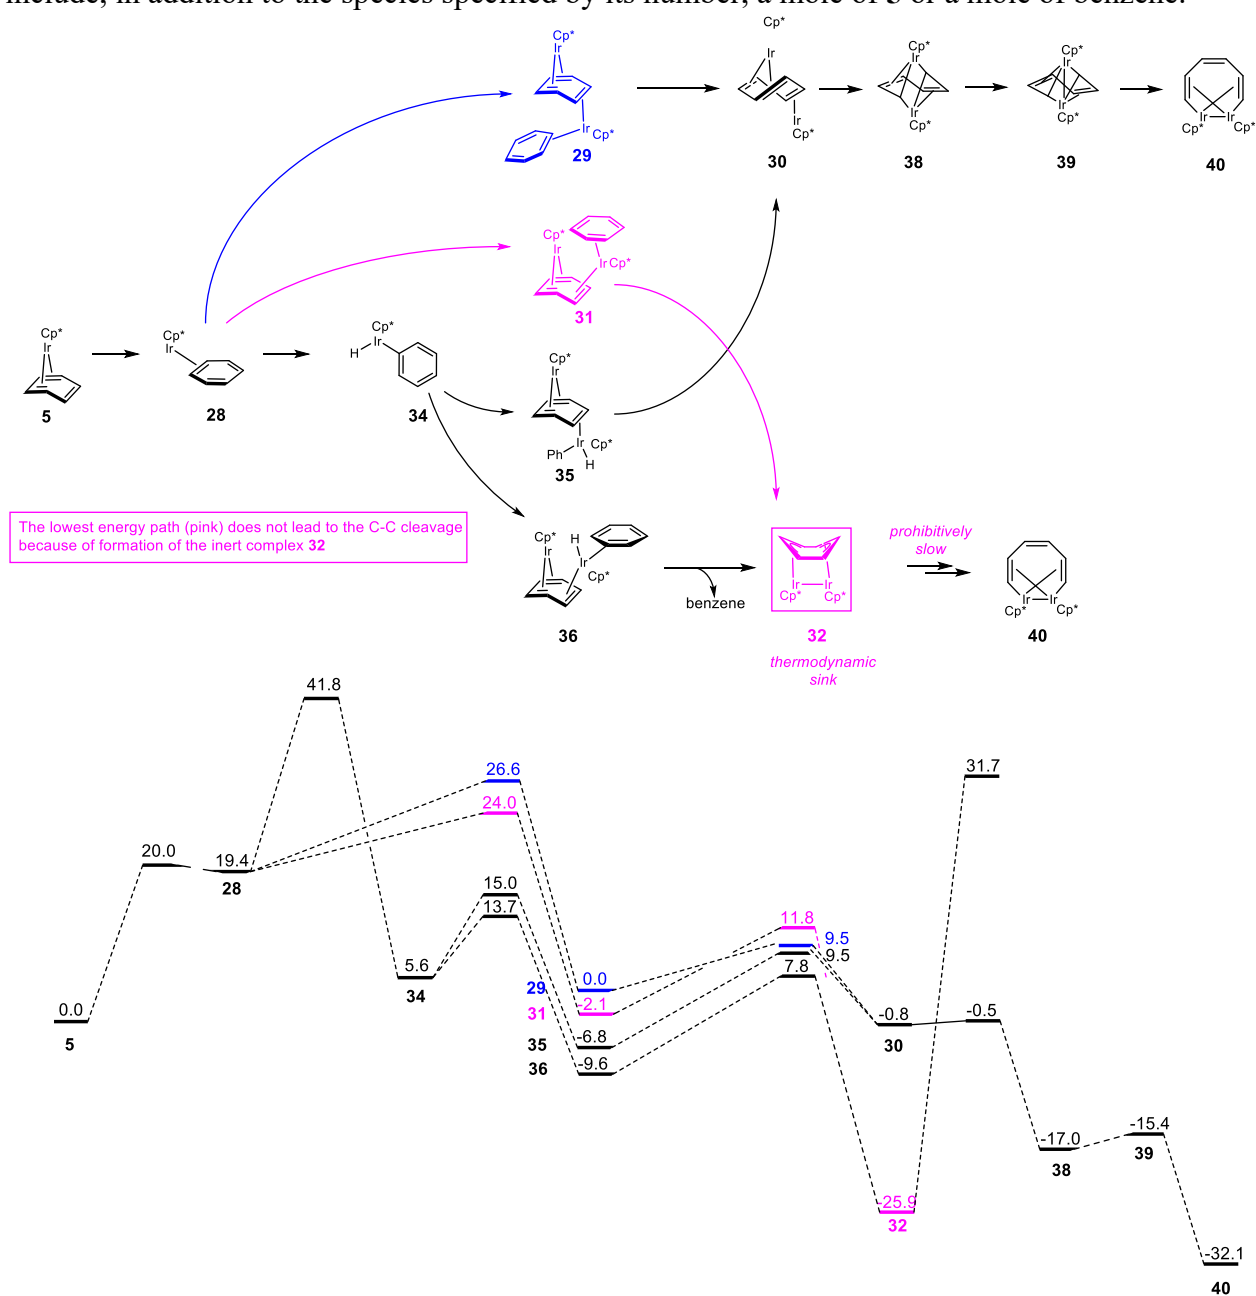

**Table S11.** Standard reaction free energies of the overall conversion of  $[\text{Cp}^*\text{Ir}(\eta^4\text{-arene})]$  (arene = benzene, *m*-xylene and mesitylene) to the corresponding metallacycles, and of the steps involving Ir-Ir bond formation,  $\Delta G^\circ_{\text{Ir-Ir}}$ , and C-C bond scission,  $\Delta G^\circ_{\text{scission}}$ , in kcal/mol. All free energies are relative to 2 moles of  $[\text{Cp}^*\text{Ir}(\eta^4\text{-arene})]$ , at M06-L/(6-311+G(d)+LANL2TZ)//B3LYP/(6-31G(d)+LANL2DZ), 1 M concentrations and 50 °C.

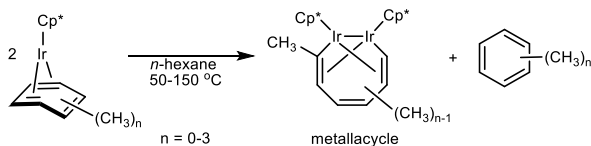

| Arene complex | Metallacycle | $\Delta G^\circ_{\text{rxn}}$ | $\Delta G^\circ_{\text{Ir-Ir}}$ | $\Delta G^\circ_{\text{scission}}$ |
|---------------|--------------|-------------------------------|---------------------------------|------------------------------------|
|               |              | -26.0                         | -14.1                           | -8.7                               |
|               |              | -28.9                         | -17.4                           | -9.8                               |
|               |              | -32.1                         | -15.1                           | -16.3                              |

**Table S12.** Free energy barriers of arene C-C bond scission in *anti*- $[(\text{Cp}^*\text{Ir})_2(\mu, \eta^4:\eta^2\text{-arene})]$ , *syn*- $[(\text{Cp}^*\text{Ir})_2(\mu, \eta^3:\eta^3\text{-arene})]$  and  $[\text{Cp}^*\text{Ir}(\eta^4\text{-arene})]$  (arene = mesitylene, *m*-xylene and benzene) in kcal/mol. All free energies are relative to 2 moles of  $\text{Cp}^*\text{Ir}(\eta^4\text{-arene})$ , at M06-L/(6-311+G(d)+LANL2TZ)//B3LYP/(6-31G(d)+LANL2DZ), 1 M concentrations and 50 °C.

|           |     |      |      |
|-----------|-----|------|------|
|           |     |      |      |
| X=Y=Me    | 4.9 | 41.8 | 46.1 |
| X=Me, Y=H | 4.9 | 30.9 | 45.3 |
| X=Y=H     | 0.2 | 57.3 | 39.1 |

**Table S13.** Standard free energies of isomerization of *anti*- $[(\text{Cp}^*\text{Ir})_2(\mu, \eta^4:\eta^2\text{-arene})]$  to *syn*- $[(\text{Cp}^*\text{Ir})_2(\mu, \eta^3:\eta^3\text{-arene})]$  for arene = mesitylene, *m*-xylene and benzene, in kcal/mol, relative to 2 moles of  $\text{Cp}^*\text{Ir}(\eta^4\text{-arene})$ , at M06-L/(6-311+G(d)+LANL2TZ)//B3LYP/(6-31G(d)+LANL2DZ), 1 M concentrations and 50 °C.

|                                  |        |           |       |
|----------------------------------|--------|-----------|-------|
|                                  | X=Y=Me | X=Me, Y=H | X=Y=H |
| $\Delta G^\ddagger_o$ , kcal/mol | -10.2  | -13.4     | -14.3 |

**Table S14.** The electronic energies (at B3LYP/(6-31G(d)+LANL2DZ)) of the products of binding of [Cp\*Ir( $\eta^4$ -arene)] to either [Cp\*Ir( $\eta^2$ -arene)] or its Ir<sup>III</sup> isomer, [Cp\*Ir(H)( $\eta^3$ -(CH<sub>2</sub>)C<sub>6</sub>H<sub>3</sub>Me<sub>2</sub>)] relative to 2 moles of Cp\*Ir( $\eta^4$ -arene). The lowest-energy product is highlighted in green; the last column indicates if arene cleavage is observed experimentally.

| Ar | Structures and relative electronic energies of early diiridium arene intermediates* |            |             |            | Arene cleavage expected? |
|----|-------------------------------------------------------------------------------------|------------|-------------|------------|--------------------------|
|    | Ir(I)Ir(III)                                                                        |            | Ir(I)Ir(I)  |            |                          |
|    | <i>anti</i>                                                                         | <i>syn</i> | <i>anti</i> | <i>syn</i> |                          |
|    |                                                                                     |            |             |            |                          |
|    | -14.8                                                                               | -2.5       | 0.4         | -2.8       | Yes                      |
|    | -12.3                                                                               | -1.0       | 6.2         | -0.4       | Yes                      |
|    | -13.7                                                                               | -2.9       | 5.9         | 0.3        | Yes                      |
|    | -20.5                                                                               | -24.0      | -15.3       | -18.1      | No                       |

**Table S15.** The electronic energies of *syn*-Ir(I)Ir(III) intermediate **38** relative to that of *anti*-Ir(I)Ir(III) analog, **37** at M06-L/(6-311+G(d)+LANL2TZ)/B3LYP/(6-31G(d)+LANL2DZ)). Arenes that form the more stable *syn* isomer are highlighted in red, more stable *anti* – in green.

| Ar                                                                                                                  |      |     |     |
|---------------------------------------------------------------------------------------------------------------------|------|-----|-----|
| $\Delta E_{syn/anti}$ , kcal/mol                                                                                    | -0.8 | 4.3 | 6.9 |
| Excess of short H...H contacts <sup>1</sup> in <i>syn</i> ( <b>38</b> ) vs. <i>anti</i> ( <b>37</b> ) intermediates | -3   | 4   | 13  |
| Arene cleavage expected?                                                                                            | no   | yes | yes |

<sup>1</sup>All short (<2.60 Å) interactions between any two hydrogen atoms located in different ligands (e.g. between Ar and Cp\*, Ar and ArH etc.). <sup>3</sup>The *syn* isomer has also 2 short H...F (<2.67 Å) and 1 F...F short (<2.96 Å) contacts.

**Table S16.** Cartesian coordinates for all calculated structures.

| Compound | Cartesian coordinates, Å                                                                                                                                                                                                                                                                                                                                                                                                                                                                                                                                                                                                                                                                                                                                                                                                                                                                                                                                                                                                                                                                                                                                                                                                                                                                                                                                                                                                                                                                                                                                                                                                                                                                                                                                                                                                                                                                                                                                                                                                                                                                                                                                                                                                                                                                                                                                                 |
|----------|--------------------------------------------------------------------------------------------------------------------------------------------------------------------------------------------------------------------------------------------------------------------------------------------------------------------------------------------------------------------------------------------------------------------------------------------------------------------------------------------------------------------------------------------------------------------------------------------------------------------------------------------------------------------------------------------------------------------------------------------------------------------------------------------------------------------------------------------------------------------------------------------------------------------------------------------------------------------------------------------------------------------------------------------------------------------------------------------------------------------------------------------------------------------------------------------------------------------------------------------------------------------------------------------------------------------------------------------------------------------------------------------------------------------------------------------------------------------------------------------------------------------------------------------------------------------------------------------------------------------------------------------------------------------------------------------------------------------------------------------------------------------------------------------------------------------------------------------------------------------------------------------------------------------------------------------------------------------------------------------------------------------------------------------------------------------------------------------------------------------------------------------------------------------------------------------------------------------------------------------------------------------------------------------------------------------------------------------------------------------------|
| 1        | 6.6.642471 6.609514 1.148416; 6.6.339879 7.312306 -0.074021; 6.4.974421 7.786871 -0.010205; 6.4.438006 7.417830 1.257724; 6.5.473812 6.734873 1.997210; 6.7.859530 5.772642 1.422180; 1.8.744635 6.177647 0.922400; 1.7.722235 4.739304 1.070026; 1.8.082991 5.729395 2.492308; 6.7.220405 7.360255 -1.289814; 1.7.059286 8.271232 -1.873785; 1.7.018384 6.504927 -1.949869; 1.8.279377 7.324569 -1.018263; 6.4.238303 8.486462 -1.116897; 1.3.471190 9.163645 -0.727595; 1.3.734222 7.766657 -1.778098; 1.4.915809 9.078731 -1.739499; 6.3.038920 7.674530 1.738604; 1.3.000484 7.785345 2.826801; 1.2.366863 6.845990 1.472266; 1.2.621848 8.586498 1.299235; 6.5.299969 6.075404 3.336609; 1.6.251136 6.004680 3.872045; 1.4.904739 5.055950 3.224492; 1.4.602767 6.629764 3.972721; 6.7.892528 10.316156 1.267071; 6.6.619388 10.894429 1.688931; 1.6.025710 11.550946 1.057081; 6.6.154095 10.450646 2.967439; 6.7.079736 9.485062 3.571464; 1.6.715964 8.981861 4.468185; 6.8.540443 9.794443 3.522433; 6.8.947867 10.222203 2.317981; 1.9.960545 10.562073 2.106052; 6.8.366204 10.587895 -0.145587; 1.9.017119 9.784487 -0.508368; 1.8.947914 11.521156 -0.191964; 1.7.526579 10.681443 -0.842658; 6.4.879495 10.926295 3.611069; 1.4.129905 11.213488 2.865478; 1.5.072327 11.800673 4.248161; 1.4.447404 10.145789 4.247227; 6.9.382507 9.689039 4.761125; 1.10.431129 9.929342 4.555829; 1.9.344934 8.674303 5.183111; 1.9.028470 10.367666 5.550436; 77.6.366153 8.766888 1.661412;                                                                                                                                                                                                                                                                                                                                                                                                                                                                                                                                                                                                                                                                                                                                                                                                                                                                          |
| 2        | 77 -0.467724 11.948633 5.473735; 77 -0.802661 9.534421 4.121199; 6 -1.165131 7.670795 2.861354; 6 -0.316041 11.539461 3.521161; 6 -0.520658 14.141227 5.857261; 6 0.112374 9.218213 7.058177; 6 -0.199626 7.015178 1.916334; 6 -2.241034 8.567814 2.492366; 6 0.311994 9.953492 5.747681; 6 -0.546927 6.276327 4.984105; 6 1.438117 10.869830 5.703631; 6 0.989929 13.721366 7.956087; 6 2.449282 10.910773 4.646716; 6 3.888826 11.062231 5.075267; 6 -1.321518 7.334759 4.252749; 6 -2.446672 8.082152 4.759727; 6 -0.244043 13.504381 7.127709; 6 0.720136 10.787605 2.874052; 6 -3.013538 8.831119 3.656721; 6 -1.397056 12.743763 7.520697; 6 2.097860 10.750337 3.355281; 6 -2.383169 12.876314 6.487621; 6 -1.848911 13.728602 5.453372; 6 0.330528 15.180582 5.184811; 6 -2.599241 14.241310 4.257281; 6 -1.576536 12.008859 8.818115; 6 -3.781431 12.334774 6.542994; 6 -3.104100 7.907427 6.099121; 6 -4.279309 9.635647 3.704959; 6 -2.579964 9.025824 1.102063; 1 -1.043371 12.004822 2.847190; 1 0.551356 9.772416 7.899931; 1 0.622919 8.244493 7.021240; 1 -0.940580 9.035467 7.287186; 1 0.740766 6.765218 2.415797; 1 0.040003 7.661158 1.067637; 1 -0.621606 6.083565 1.511846; 1 0.490266 6.229895 4.639676; 1 -0.996605 5.285721 4.823771; 1 -0.528292 6.457667 6.061972; 1 1.861520 11.085068 6.690186; 1 1.222181 12.848461 8.574112; 1 0.860787 14.578440 8.631965; 1 1.862395 13.923027 7.328146; 1 4.052971 12.020825 5.588189; 1 4.568160 11.025982 4.216880; 1 4.189996 10.274778 5.780996; 1 2.872786 10.651802 2.595064; 1 1.395428 14.995384 5.351888; 1 0.102009 16.186457 5.567616; 1 0.168002 15.192200 4.103326; 1 -1.922538 14.453484 3.423719; 1 -3.136968 15.170905 4.491094; 1 -3.336718 13.513725 3.903706; 1 -2.200783 11.117991 8.695322; 1 -2.058007 12.645771 9.574197; 1 -0.618231 11.681533 9.232186; 1 -4.200946 12.200948 5.542736; 1 -4.443285 13.023902 7.087607; 1 -3.823073 11.369709 7.057832; 1 -2.426074 7.457189 6.828296; 1 -3.979723 7.247433 6.017940; 1 -3.449717 8.861682 6.510158; 1 -4.465170 10.031899 4.706240; 1 -5.147216 9.018601 3.429036; 1 -4.247225 10.480857 3.009991; 1 -2.930538 10.063321 1.085117; 1 -3.380981 8.404845 0.675525; 1 -1.722643 8.952733 0.428827; 6 0.619276 10.636658 1.360594; 1 1.200899 11.431869 0.870509; 1 1.032006 9.682326 1.013827; 1 -0.411582 10.715040 1.008729; |
| 3        | 77 4.726294 8.173354 1.520857; 6.6.178935 7.189039 2.832043; 6.5.716077 6.466618 4.079892; 6.6.061159 6.490509 1.569467; 1.5.692799 5.470830 1.480854; 6.6.337402 7.284358 0.407492; 6.6.253316 6.750219 -0.996444; 6.6.694266 8.658308 0.729164; 1.6.735500 9.342387 -0.118789; 6.7.606954 8.979176 1.844684; 6.7.408154 8.073550 3.041662; 6.2.862707 8.637807 2.719855; 6.2.417384 7.790859 1.638307; 6.2.681636 8.471756 0.404087; 6.3.312651 9.728162 0.176455; 6.3.396863 9.855259 2.158655; 6.2.643476 8.375686 4.182107; 1.6.60315 8.749605 4.500664; 1.3.399803 8.872770 4.796601; 1.2.679747 7.307306 4.413448; 6.1.708584 6.474822 1.786069; 1.2.014320 5.953133 2.697875; 1.1.911985 5.809615 0.940903; 1.0.619084 6.614276 1.838906; 6.2.316090 7.983905 -0.968305; 1.2.346949 6.891355 -1.029966; 1.2.995983 8.376965 -1.730369; 1.1.299449 8.299079 -1.244054; 6.3.667308 10.804594 -0.270314; 1.4.503502 11.412668 0.086941; 1.2.815539 11.478187 -0.439774; 1.3.952959 10.385836 -1.240314; 6.3.803456 11.086788 2.916854; 1.4.595983 11.633839 2.397785; 1.4.180811 10.836723 3.912896; 1.2.954034 11.773650 3.046782; 1.4.868285 5.803953 3.873936; 1.5.409980 7.174147 4.859313; 1.6.528017 5.854081 4.502408; 1.5.535545 5.925323 -1.070327; 1.7.232267 6.375273 -1.325883; 1.5.949402 7.534523 -1.698273; 1.8.300812 7.449904 3.219443; 1.7.269481 8.675297 3.949272; 6.8.475354 10.000918 1.815865; 1.8.582677 10.631489 0.936279; 1.9.102648 10.244237 2.669920;                                                                                                                                                                                                                                                                                                                                                                                                                                                                                                                                                                                                                                                                                                                                                                                                                                                                                 |
| 4        | 77 11.834077 18.854075 19.837442; 6.13.386425 14.269358 16.674163; 1.13.966676 13.447385 16.257577; 6.11.694101 12.578285 17.504035; 1.11.664422 12.275119 18.559003; 1.12.334958 11.866486 16.973364; 6.12.194913 13.997039 17.346404; 6.11.460566 15.071663 17.874427; 1.10.511772 14.867273 18.369768; 6.12.101195 21.154253 19.850815; 6.10.323953 20.255224 21.063571; 6.11.062726 20.786270 18.918750; 6.9.951153 20.255358 19.691064; 6.11.893745 16.399842 17.760179; 6.11.664714 20.809257 21.167957; 6.13.097121 16.630232 17.063587; 1.13.451560 17.653451 16.962770; 6.13.845139 15.588833 16.516493; 6.11.078834 17.534410 18.313220; 1.10.115396 17.143064 18.665267; 1.10.862384 18.228061 17.490444; 6.11.018418 21.125508 17.456127; 1.12.024243 21.211715 17.034324; 1.10.502601 22.081184 17.282839; 1.10.485769 20.361849 16.879323; 6.13.372939 21.877075 19.505566; 1.14.175816 21.636552 20.208260; 1.13.221434 22.965657 19.531879; 1.13.722777 21.615095 18.503361; 6.9.443279 19.895626 22.227650; 1.8.668007 19.177933 21.943496; 1.8.935941 20.784968 22.628910; 1.10.015041 19.455811 23.051420; 6.8.620367 19.861661 19.118414; 1.8.732630 19.276462 18.199593; 1.8.022298 20.749587 18.869868; 1.8.038994 19.259651 19.823027; 6.15.121883 15.864341 15.753303; 1.15.944507 15.227276 16.101146; 1.15.435310 16.907670 15.862716; 1.14.997301 15.666958 14.680108; 6.12.363126 21.175341 22.447760; 1.12.112914 20.489269 23.262041; 1.12.077557 22.185076 22.778118; 1.13.451244 21.167296 22.331233; 1.10.675193 12.466956 17.112099; 1.12.391282 17.123419 21.199778; 6.13.852600 16.101858 20.720924; 1.13.695433 15.681163 19.725330; 1.14.737255 16.744711 20.686149; 1.14.019927 15.291702 21.440067; 6.12.842105 17.587179 22.937336; 1.13.674158 18.296984 22.924357; 1.11.989702 18.064318 23.430120; 1.13.133035 16.703016 23.516348; 6.11.103316 11.830682 21.525270; 1.10.200876 16.308921 21.918985; 1.10.849689 15.330080 20.588026; 1.11.457530 15.082999 22.244603; 1.13.243676 18.553307 19.155448;                                                                                                                                                                                                                                                                                                                     |
| 5        | 6.6.646850 6.613444 1.140030; 6.6.329425 7.333033 -0.074334; 6.4.957318 7.785397 0.000557; 6.4.439149 7.410572 1.273934; 6.5.486634 6.723996 1.997841; 6.7.873758 5.785518 1.395435; 1.8.749899 6.202574 0.890124; 1.7.741433                                                                                                                                                                                                                                                                                                                                                                                                                                                                                                                                                                                                                                                                                                                                                                                                                                                                                                                                                                                                                                                                                                                                                                                                                                                                                                                                                                                                                                                                                                                                                                                                                                                                                                                                                                                                                                                                                                                                                                                                                                                                                                                                            |

|        |                                                                                                                                                                                                                                                                                                                                                                                                                                                                                                                                                                                                                                                                                                                                                                                                                                                                                                                                                                                                                                                                                                                                                                                                                                                                                                                                                                                                                                                                                                                                                                                                                |
|--------|----------------------------------------------------------------------------------------------------------------------------------------------------------------------------------------------------------------------------------------------------------------------------------------------------------------------------------------------------------------------------------------------------------------------------------------------------------------------------------------------------------------------------------------------------------------------------------------------------------------------------------------------------------------------------------------------------------------------------------------------------------------------------------------------------------------------------------------------------------------------------------------------------------------------------------------------------------------------------------------------------------------------------------------------------------------------------------------------------------------------------------------------------------------------------------------------------------------------------------------------------------------------------------------------------------------------------------------------------------------------------------------------------------------------------------------------------------------------------------------------------------------------------------------------------------------------------------------------------------------|
|        | 4.754128 1.036182; 1 8.108264 5.736884 2.462911; 6 7.208979 7.418331 -1.289890; 1 7.027449 8.336950 -1.856409; 1 7.025312 6.571469 -1.965930; 1 8.267727 7.401528 -1.016628; 6 4.205674 8.492907 -1.090005; 1 3.445883 9.168724 -0.684392; 1 3.690461 7.777178 -1.746819; 1 4.874569 9.087467 -1.719550; 6 3.042589 7.652750 1.769729; 1 3.012096 7.740156 2.859977; 1 2.372338 6.827168 1.489964; 1 2.619510 8.572222 1.352438; 6 5.328464 6.058919 3.336261; 1 6.287378 5.977340 3.855692; 1 4.922517 5.043828 3.223492; 1 4.646227 6.615777 3.986058; 6 7.942779 10.217947 1.287220; 6 6.678455 10.877624 1.613621; 1 6.139173 11.532110 0.935519; 6 6.164431 10.498162 2.890691; 6 7.017326 9.534852 3.587054; 1 6.598363 9.077692 4.481334; 6 8.482611 9.795530 3.566167; 6 8.965209 10.151713 2.367006; 1 9.992796 10.456898 2.183723; 7 6.362229 8.759411 1.655594; 1 8.295860 10.330903 0.264072; 1 5.202936 10.840824 3.260928; 1 9.067642 9.774075 4.482659;                                                                                                                                                                                                                                                                                                                                                                                                                                                                                                                                                                                                                                         |
| 1-6_ts | 77 -0.763382 2.692244 4.820227; 6 -2.576652 3.156152 5.815703; 6 -1.628740 2.529584 6.762703; 6 0.543474 3.774587 3.467473; 6 -0.284907 2.970807 2.612677; 6 -0.072936 1.620355 3.055957; 6 1.109894 1.576872 3.947599; 6 1.489866 2.896240 4.199463; 6 2.609098 3.390911 5.064174; 6 1.736285 0.319362 4.470694; 6 -0.741996 0.400288 2.496559; 6 -1.213163 3.444115 1.533723; 6 0.651413 5.269611 3.433461; 1 -1.762862 1.464752 6.975551; 6 -1.050550 3.310412 7.856830; 6 -0.241273 2.584212 8.899491; 6 -1.273407 4.653225 7.913781; 1 -0.843154 5.239596 8.724125; 6 -2.090858 5.331202 6.930294; 6 -2.263013 6.826849 7.042031; 6 -2.708971 4.609693 5.949533; 1 -3.371101 5.114858 5.246468; 6 -3.816342 2.410543 5.336170; 1 -1.751879 0.627150 2.143269; 1 -0.818787 -0.391774 3.247689; 1 -0.169847 -0.001043 1.647634; 1 -2.072890 2.776054 1.421994; 1 -0.704594 3.492262 0.559079; 1 -1.602637 4.443674 1.750330; 1 -0.291716 5.729178 3.125383; 1 1.430352 5.584828 2.724268; 1 0.913533 5.670818 4.416831; 1 3.309581 2.594266 5.697649; 1 2.276539 4.200437 5.722478; 1 3.437492 3.781931 4.455835; 1 0.977983 -0.410532 4.771962; 1 2.368287 0.516399 5.341385; 1 2.363212 -0.159383 3.704495; 1 -4.174271 1.815521 4.382020; 1 -4.632777 2.504994 6.068109; 1 -3.618730 1.342986 5.192217; 1 -2.944548 7.212504 6.276544; 1 -1.303620 7.351949 6.931720; 1 -2.663937 7.111035 8.024607; 1 0.608406 2.057975 8.444220; 1 -0.845220 1.822838 9.413049; 1 0.149543 3.271061 9.657542;                                                                                                          |
| 6      | 77 -0.788565 2.353181 4.943735; 6 -2.560308 2.995287 5.912225; 6 -1.515105 2.656180 6.903139; 6 0.555967 3.630001 3.941377; 6 -0.261227 3.084697 2.845913; 6 -0.048640 1.691594 2.860982; 6 1.029973 1.379328 3.823588; 6 1.465591 2.571794 4.419714; 6 2.601695 2.772770 5.376680; 6 1.585545 0.002468 4.038687; 6 -0.698769 0.669059 1.976015; 6 -1.145963 3.881985 1.934734; 6 0.712043 5.088013 4.250690; 1 -1.584767 1.678428 7.395592; 6 -0.921275 3.717078 7.717306; 6 0.050211 3.324305 8.799721; 6 -1.281786 5.013381 7.498488; 1 -0.837478 5.802907 8.103382; 6 -2.276325 5.384324 6.512135; 6 -2.624511 6.845289 6.354513; 6 -2.888591 4.413762 5.776224; 1 -3.678916 4.684373 5.075669; 6 -3.705622 2.011072 5.682968; 1 -1.629950 1.046421 1.544243; 1 -0.936217 -0.245728 2.529243; 1 -0.035441 0.384953 1.146489; 1 -1.907771 3.253099 1.464099; 1 -0.564338 4.356221 1.130547; 1 -1.665453 4.676911 2.479026; 1 -0.222040 5.629534 4.079741; 1 1.489484 5.535090 3.614220; 1 0.995871 5.242471 5.295493; 1 2.884238 1.837470 5.869376; 1 2.342987 3.494059 6.158316; 1 3.493267 3.156662 4.858944; 1 0.789418 -0.747575 4.091239; 1 2.161128 -0.058962 4.966575; 1 2.250725 -0.287913 3.212687; 1 -4.203222 2.201062 4.724798; 1 -4.459760 2.099963 6.480171; 1 -3.364340 0.968161 5.677246; 1 -3.420463 6.991519 5.616611; 1 -1.755452 7.435740 6.031016; 1 -2.962481 7.281803 7.304392; 1 0.903837 2.771336 8.385885; 1 -0.425878 2.659855 9.535005; 1 0.434874 4.198172 9.336162;                                                                                                           |
| 6-7_ts | 77 12.204184 15.246799 20.437301; 1 10.589510 15.804780 20.607852; 6 13.001016 13.954629 16.903972; 1 13.597300 13.303840 16.265792; 6 11.948860 11.903211 17.904779; 1 12.165208 11.543461 18.918795; 1 12.595447 11.364494 17.204554; 6 12.134963 13.394988 17.804333; 6 11.317484 14.248154 18.651443; 1 10.348656 13.841793 18.942313; 6 14.103339 14.246562 20.968822; 6 12.947992 15.481284 22.534667; 6 14.538909 15.633085 20.846351; 6 13.814594 16.394581 21.788330; 6 11.468766 15.690592 18.484272; 6 13.213077 14.135947 22.107241; 6 12.357121 16.220838 17.483288; 1 12.410876 17.298904 17.344464; 6 13.115574 15.380494 16.713436; 6 10.602746 16.465530 19.387704; 1 9.528325 16.254655 19.318595; 1 10.792608 17.535253 19.462530; 6 15.536182 16.124352 19.839165; 1 15.257571 15.823536 18.822137; 1 16.538322 15.720616 20.039650; 1 15.612911 17.215646 19.849994; 6 14.741424 13.099749 20.238714; 1 14.142410 12.188802 20.323183; 1 15.736436 12.882212 20.652221; 1 14.860955 13.319693 19.173368; 6 12.123653 15.872713 23.729734; 1 11.670986 16.860920 23.602035; 1 12.742800 15.908972 24.637464; 1 11.314525 15.158511 23.906789; 6 13.917418 17.872612 22.034764; 1 14.289921 18.405318 21.154503; 1 14.601040 18.092267 22.867589; 1 12.945814 18.304993 22.294730; 6 14.045497 15.901824 15.643671; 1 15.080562 15.576519 15.813138; 1 14.040394 16.996032 15.605860; 1 13.758147 15.530604 14.650440; 6 12.749625 12.870012 22.767678; 1 11.780562 13.004364 23.257408; 1 13.465683 12.535767 23.534210; 1 12.639361 12.056270 22.044753; 1 10.908063 11.623338 17.689321; |
| 7      | 77 11.980106 15.168902 20.460084; 1 10.586626 14.552097 20.929699; 6 12.976962 14.034831 16.800669; 1 13.591596 13.400305 16.164125; 6 11.807983 11.971381 17.648067; 1 11.987477 11.570008 18.653697; 1 12.465212 11.446867 16.947181; 6 12.033518 13.461387 17.616060; 6 11.201625 14.300486 18.442773; 1 10.258447 13.889220 18.763266; 6 14.063600 14.276173 21.010009; 6 12.786728 15.598509 22.443276; 6 14.323371 15.665575 20.690586; 6 13.548674 16.474172 21.570987; 6 11.380962 15.732886 18.400024; 6 13.153522 14.222479 22.110860; 6 12.376480 16.271350 17.508182; 1 12.487036 17.352577 17.456221; 6 13.141779 15.458757 16.712350; 6 10.672726 16.505652 19.406237; 1 9.620467 16.291996 19.578342; 1 10.905953 17.569921 19.449481; 6 15.294508 16.134026 19.647934; 1 15.170162 15.585985 18.708163; 1 16.331679 15.988156 19.981539; 1 15.167425 17.197630 19.426870; 6 14.730158 13.114407 20.333182; 1 14.252864 12.167221 20.598907; 1 15.788125 13.046500 20.622912; 1 14.691932 13.214394 19.242352; 6 12.016388 16.029344 23.659394; 1 11.516067 16.988373 23.496189; 1 12.681512 16.141500 24.528083; 1 11.246043 15.298842 23.920971; 6 13.554930 17.973903 21.645890; 1 13.784851 18.427606 20.677114; 1 14.309010 18.326780 22.363416; 1 12.584653 18.359922 21.971216; 6 14.137092 16.022719 15.725728; 1 15.147537 15.632071 15.903079; 1 14.183793 17.114855 15.782122; 1 13.870108 15.750986 14.695746; 6 12.758052 13.000342 22.890707; 1 11.758233 13.108263 23.319763; 1 13.459189 12.819928 23.718068; 1 12.748837 12.106270 22.260691; 1 10.769603 11.723645 17.389984; |
| 7-8_ts | 77 -0.704251 1.912223 3.745885; 6 -1.628130 -0.200366 3.375840; 6 -0.226718 -0.252710 3.234082; 6 0.132162 0.742956 2.214326; 6 -1.115639 1.215146 1.585316; 6 -2.178119 0.698651 2.344202; 6 -3.644062 0.933299 2.129274; 6 -1.188549 2.101209 0.379006; 6 1.505037 0.952565 1.648681; 6 0.738405 -1.130248 3.974828; 6 -2.467900 -1.005656 4.322917; 1 2.274430 0.759957 2.401034; 1 1.635855 1.981279 1.300801; 1 1.681534 0.276076 0.799580; 1 1.682341 -0.611576 4.163641; 1 0.965121 -2.037238 3.96512; 1 0.335976 -1.443762 4.942317; 1 -1.883972 -1.356558 5.177924; 1 -2.888617 -1.888089 3.820151; 1 -3.308820 -0.421888 4.710768; 1 -3.825615 1.824732 1.522897; 1 -4.173368 1.063159 3.078720; 1 -4.105535 0.079145 1.613839; 1 -0.391969 2.851200 0.389465; 1 -2.143903 2.631196 0.321924; 1 -1.077827 1.514761 -0.543857; 6 2.432113 5.593656 1.847993; 6 1.163791 5.038356                                                                                                                                                                                                                                                                                                                                                                                                                                                                                                                                                                                                                                                                                                                      |

|        |                                                                                                                                                                                                                                                                                                                                                                                                                                                                                                                                                                                                                                                                                                                                                                                                                                                                                                                                                                                                                                                                                                                                                                                                                                                                                                                                                                                                                                                                                                                                                                                                                                                                                                                                                                                                                                                                                                                                                                                                                                                                                                                                                                                                                                                                                                                                                                                                                                                                                                                                                                                                                                                                                                                                                                                                                                                                                                                                                                                                                                        |
|--------|----------------------------------------------------------------------------------------------------------------------------------------------------------------------------------------------------------------------------------------------------------------------------------------------------------------------------------------------------------------------------------------------------------------------------------------------------------------------------------------------------------------------------------------------------------------------------------------------------------------------------------------------------------------------------------------------------------------------------------------------------------------------------------------------------------------------------------------------------------------------------------------------------------------------------------------------------------------------------------------------------------------------------------------------------------------------------------------------------------------------------------------------------------------------------------------------------------------------------------------------------------------------------------------------------------------------------------------------------------------------------------------------------------------------------------------------------------------------------------------------------------------------------------------------------------------------------------------------------------------------------------------------------------------------------------------------------------------------------------------------------------------------------------------------------------------------------------------------------------------------------------------------------------------------------------------------------------------------------------------------------------------------------------------------------------------------------------------------------------------------------------------------------------------------------------------------------------------------------------------------------------------------------------------------------------------------------------------------------------------------------------------------------------------------------------------------------------------------------------------------------------------------------------------------------------------------------------------------------------------------------------------------------------------------------------------------------------------------------------------------------------------------------------------------------------------------------------------------------------------------------------------------------------------------------------------------------------------------------------------------------------------------------------------|
|        | 2.079445; 1 0.457167 4.971829 1.252480; 6 0.769641 4.588716 3.346587; 6 1.691782 4.724911 4.401917; 1 1.408251 4.371500 5.390905; 6 2.956886 5.277226 4.207344; 6 3.319729 5.704400 2.918720; 1 4.307290 6.133005 2.754327; 6 2.812376 6.082681 0.467602; 1 2.226312 6.965516 0.179045; 1 2.631523 5.316728 -0.297001; 1 3.870695 6.359860 0.418876; 6 -0.595782 3.998065 3.562893; 6 3.926584 5.426234 5.359029; 1 4.108188 6.482771 5.597671; 1 4.901440 4.980725 5.124175; 1 3.547475 4.942274 6.265100; 1 -1.259924 4.310880 2.745441; 1 -1.020412 4.372418 4.506389; 1 0.295336 2.115185 4.991451; 77 -2.383120 4.275294 9.232043; 6 -4.015929 3.924852 10.715842; 6 -3.759473 5.349301 10.643686; 6 -2.814548 3.316337 11.233426; 6 -5.329998 3.241623 10.466126; 6 -2.455987 5.613124 11.207068; 6 -4.766293 6.393116 10.248870; 6 -1.868053 4.362379 11.557254; 6 -2.654191 1.862470 11.574763; 1 -5.902439 3.748281 9.683372; 1 -5.951618 3.226199 11.374223; 1 -5.188533 2.205004 10.145572; 6 -1.840143 6.969138 11.399165; 1 -4.283947 7.283337 9.833192; 1 -5.359588 6.714396 11.116694; 1 -5.461596 6.011528 9.495636; 6 -0.526206 4.162034 12.201901; 1 -3.249849 1.228357 10.911698; 1 -2.981910 1.665732 12.605360; 1 -1.612567 1.538175 11.492971; 1 -0.747427 6.927429 11.345599; 1 -2.103796 7.393124 12.378767; 1 -2.180516 7.677458 10.637377; 1 -0.095952 3.190474 11.941033; 1 -0.599694 4.202129 13.298314; 1 0.188323 4.932432 11.894483; 6 -1.450258 5.120113 7.495898; 6 -2.877298 4.915525 7.221665; 6 -0.797731 3.894618 7.837796; 6 -3.269619 3.752640 6.375124; 1 -3.469859 5.823944 7.108883; 6 -1.659571 2.718443 7.834801; 1 0.244505 3.865487 8.145260; 6 -2.626202 2.617690 6.703205; 1 -2.743932 1.675514 6.171092; 6 -4.249050 3.934550 5.252236; 1 -3.865909 4.632745 4.494914; 1 -4.470173 2.985515 4.752570; 1 -5.196671 4.354898 5.618679; 6 -1.087413 1.414725 8.348075; 1 -0.365381 1.579635 9.154997; 1 -1.875478 0.756126 8.731249; 1 -0.573022 0.878921 7.536485; 6 -0.749935 6.449487 7.413246; 1 -0.349637 6.608443 6.402836; 1 -1.441935 7.270654 7.630970; 1 0.086535 6.510615 8.118166;                                                                                                                                                                                                                                                                                                                                                                                                                                                                                                                                                                                                                                                                                                                                                                                                                                                                                           |
| 8      | 77 -0.883357 2.422808 4.342890; 6 -1.566295 0.208790 3.756436; 6 -0.141271 0.347837 3.671432; 6 0.142555 1.313276 2.636134; 6 -1.128235 1.720237 2.062419; 6 -2.173736 1.045399 2.748437; 6 -3.632041 1.077051 2.389365; 6 -1.300181 2.597404 0.857969; 6 1.498880 1.584984 2.048957; 6 0.878847 -0.477175 4.405518; 6 -2.301823 -0.778834 4.615412; 1 2.280565 1.542116 2.812431; 1 1.552901 2.573728 1.588544; 1 1.743015 0.839126 1.278245; 1 1.813252 0.074468 4.540155; 1 1.113489 -1.397771 3.851709; 1 0.524361 -0.771159 5.398101; 1 -1.732555 -1.039929 5.511951; 1 -2.488776 -1.709350 4.061209; 1 -3.276641 -0.397593 4.938518; 1 -3.943324 2.064477 2.034237; 1 -4.267830 0.817021 3.241344; 1 -3.857799 0.356703 1.589439; 1 -0.487686 3.321902 0.769842; 1 -2.244821 3.150157 0.889758; 1 -1.304912 1.992619 -0.060035; 6 2.113645 5.755719 1.272256; 6 0.890497 5.370501 1.845500; 1 -0.028523 5.541496 1.286886; 6 0.811027 4.802073 3.124953; 6 2.017134 4.642340 3.836298; 1 1.983085 4.195947 4.826999; 6 3.247835 5.020138 3.300293; 6 3.284047 5.570588 2.008233; 1 4.240371 5.861942 1.576373; 6 2.149007 6.376692 -0.106754; 1 1.653985 7.356722 -0.117177; 1 1.631884 5.750859 -0.844834; 1 3.177304 6.522441 -0.453693; 6 -0.522453 4.464591 3.736923; 6 4.527352 4.844937 4.088275; 1 5.004666 5.811079 4.298473; 1 5.259817 4.241356 3.537242; 1 4.341078 4.350851 5.047425; 1 -1.322653 4.721585 3.030962; 6 -0.660248 5.092328 4.616510; 1 0.337100 2.798549 5.264555; 77 -2.039026 4.041661 8.696109; 6 -4.019045 3.947908 9.730870; 6 -3.605783 5.334947 9.661187; 6 -3.053651 3.268639 10.562413; 6 -5.302599 3.372415 9.203620; 6 -2.452370 5.514433 5.1010331; 6 -4.368728 6.435656 8.979148; 6 -2.105045 4.240624 11.056953; 6 -3.140939 1.834413 10.999826; 1 -5.629869 3.886814 8.295156; 1 -6.113030 3.460612 9.943178; 1 -5.196018 2.311692 8.956840; 6 -1.760689 6.817454 10.790739; 1 -3.707962 7.248899 8.663201; 1 -5.123846 8.66318 9.651942; 1 -4.888434 6.068591 8.089460; 6 -0.994865 3.967040 12.031125; 1 -3.608437 1.210156 10.232571; 1 -3.742585 1.741072 11.915078; 1 -2.153511 1.413627 11.211157; 1 -0.695044 6.672918 10.996002; 1 -2.197376 7.321249 11.665060; 1 -1.842553 7.506794 9.944718; 1 -0.617985 2.944319 11.934751; 1 -1.335533 4.092513 13.069160; 1 -0.149377 4.646084 11.881286; 6 -0.621605 4.695555 7.211706; 6 -1.923519 4.601199 6.579759; 6 -0.193784 3.449993 7.772161; 6 -2.329516 3.418980 5.736884; 1 -2.374387 5.553728 6.299747; 6 -1.105214 2.343407 7.599605; 1 0.729333 3.369925 8.341463; 6 -1.842677 2.204943 6.294452; 1 -2.461376 1.310260 6.232029; 6 -3.715045 3.542655 5.139082; 1 -3.756165 4.320094 4.365741; 1 -4.048409 2.603538 4.690106; 1 -4.437137 3.819167 5.923212; 6 -0.780052 1.044337 8.305107; 1 -0.269516 1.219181 9.258249; 1 -1.685151 0.461216 8.512592; 1 -0.123386 0.419374 7.680669; 6 0.195434 5.957177 7.290230; 1 0.841773 6.051930 6.407350; 1 -0.450268 6.841749 7.323728; 1 0.836114 5.965337 8.179477;         |
| 8-9_ts | 6 7.001659 6.955236 1.312182; 6 6.809444 7.599607 0.034286; 6 5.428586 8.015224 -0.069667; 6 4.771029 7.671499 1.150066; 6 5.744093 7.056059 2.022233; 6 8.207471 6.167199 1.738456; 1 9.130682 6.594987 1.335741; 1 8.146210 5.124709 1.390122; 1 8.308264 6.143760 2.827576; 6 7.817711 7.639316 -1.078420; 1 7.676845 8.511578 -1.723811; 1 7.738377 6.743815 -1.711217; 1 8.839667 7.678899 -0.690008; 6 4.788684 8.638508 -1.277364; 1 3.963682 9.302832 -1.000331; 1 4.379386 7.872840 -1.952483; 1 5.507710 9.228153 -1.854222; 6 3.316978 7.878903 1.462186; 1 3.151580 8.025760 2.534094; 1 2.714272 7.011509 1.156165; 1 2.913471 8.754604 0.943335; 6 5.448051 6.436783 3.359461; 1 6.335547 6.424558 3.998557; 1 5.104871 5.398504 3.245595; 1 4.665234 6.984712 3.893327; 6 8.096241 10.739771 1.422710; 6 6.761752 11.254783 1.608513; 1 6.241313 11.829082 0.845223; 6 6.110841 10.872233 2.829969; 6 6.946783 10.039278 3.671599; 1 6.434972 9.581593 4.519808; 6 8.439687 10.220297 3.836404; 6 9.038674 10.638102 2.591834; 1 9.993830 10.190514 2.309952; 6 8.752940 10.966768 0.077533; 1 9.476468 10.175966 -0.153132; 1 9.301054 11.920866 0.074991; 1 8.018274 10.995194 -0.734703; 6 4.695547 11.278862 3.158189; 1 4.088811 11.363057 2.249431; 1 4.661496 12.251634 3.667746; 1 4.221834 10.542429 3.816881; 6 9.055743 9.118904 4.679671; 1 10.147751 9.138747 4.634075; 1 8.724399 8.132352 4.319881; 1 8.762509 9.202131 5.734296; 77 6.576539 9.122589 1.691133; 1 11.744985 12.438273 1.349780; 6 11.852736 13.328812 1.976154; 6 11.428703 13.064501 3.392499; 1 11.255824 14.124604 1.521075; 1 12.907957 13.637775 1.930673; 6 10.855327 13.995455 4.302875; 6 11.638940 11.823009 4.127938; 6 10.822375 13.380655 5.627832; 6 10.526574 15.434035 4.017644; 6 11.338628 12.070731 5.531572; 6 12.439561 10.657647 3.615728; 77 9.435083 12.164260 4.026648; 6 10.370398 14.079157 6.877398; 1 10.335823 15.595296 2.952861; 1 11.357290 16.092773 4.310312; 1 9.636556 15.764560 4.560784; 6 11.590911 11.113259 6.659649; 1 12.248146 10.466367 2.555374; 1 12.220274 9.736140 4.163172; 1 13.516321 10.852451 3.722208; 6 6.971267 14.521560 4.535944; 6 6.807555 15.392047 5.619782; 1 11.168292 14.714043 7.287975; 1 10.083517 13.368827 7.659522; 1 9.512193 14.731762 6.685268; 1 11.365244 10.081163 6.375766; 1 10.982348 11.352885 7.537098; 1 12.644584 11.141597 6.974195; 6 6.655849 14.992502 3.251100; 6 7.421659 13.096216 4.771113; 1 7.041079 15.040257 6.623299; 6 6.336698 16.702302 5.446574; 6 6.183618 16.290399 3.044384; 1 6.797389 14.334018 2.396417; 1 6.596646 12.393664 4.670314; 1 7.799249 12.993001 5.790162; 1 8.009025 12.881309 3.549364; 6 6.146256 17.612993 6.638717; 6 6.033447 17.135634 4.154066; 6 5.831407 16.778626 1.657183; 1 6.980745 17.531552 7.344872; 1 5.231694 17.359851 7.191635; 1 6.064162 18.661143 6.332902; 1 5.676957 18.153454 4.003719; 1 6.206877 16.098049 0.886286; 1 6.250777 17.772950 1.462973; 1 4.743945 16.858070 1.526499; |

|          |                                                                                                                                                                                                                                                                                                                                                                                                                                                                                                                                                                                                                                                                                                                                                                                                                                                                                                                                                                                                                                                                                                                                                                                                                                                                                                                                                                                                                                                                                                                                                                                                                                                                                                                                                                                                                                                                                                                                                                                                                                                                                                                                                                                                                                                                                                                                                                                                                                                                                                                                                                                                                                                                                                                                                                                                                                                                                                                                                                                                                                         |
|----------|-----------------------------------------------------------------------------------------------------------------------------------------------------------------------------------------------------------------------------------------------------------------------------------------------------------------------------------------------------------------------------------------------------------------------------------------------------------------------------------------------------------------------------------------------------------------------------------------------------------------------------------------------------------------------------------------------------------------------------------------------------------------------------------------------------------------------------------------------------------------------------------------------------------------------------------------------------------------------------------------------------------------------------------------------------------------------------------------------------------------------------------------------------------------------------------------------------------------------------------------------------------------------------------------------------------------------------------------------------------------------------------------------------------------------------------------------------------------------------------------------------------------------------------------------------------------------------------------------------------------------------------------------------------------------------------------------------------------------------------------------------------------------------------------------------------------------------------------------------------------------------------------------------------------------------------------------------------------------------------------------------------------------------------------------------------------------------------------------------------------------------------------------------------------------------------------------------------------------------------------------------------------------------------------------------------------------------------------------------------------------------------------------------------------------------------------------------------------------------------------------------------------------------------------------------------------------------------------------------------------------------------------------------------------------------------------------------------------------------------------------------------------------------------------------------------------------------------------------------------------------------------------------------------------------------------------------------------------------------------------------------------------------------------------|
| 8-12_ts  | <p>77 -1.056355 2.447298 4.061009; 6 -2.062161 0.467655 3.124642; 6 -0.631808 0.404902 2.960730; 6 -0.207206 1.496371 2.141655; 6 -1.387475 2.298551 1.853463; 6 -2.528817 1.631192 2.428919; 6 -3.959943 2.019947 2.195760; 6 -1.444820 3.441309 0.881196; 6 1.148630 1.654308 1.519159; 6 0.245594 -0.704731 3.467745; 6 -2.901395 -0.598354 3.771736; 1 1.942973 1.294091 2.178968; 1 1.373024 2.697516 1.289132; 1 1.207276 1.082041 0.581149; 1 1.277527 -0.368972 3.601473; 1 0.259400 -1.546259 2.760421; 1 -0.108008 -1.092830 4.428305; 1 -2.473213 -0.939579 4.721291; 1 -2.986750 -1.481943 3.122811; 1 -3.918289 -0.250193 3.973706; 1 -4.075678 3.105633 2.127790; 1 -4.618823 1.665103 2.992185; 1 -4.324051 1.590319 1.251353; 1 -0.521022 4.025069 0.900068; 1 -2.272582 4.120863 1.106698; 1 -1.585238 3.074580 -0.145800; 6 2.952944 5.301140 1.846637; 6 1.640119 5.188875 2.333619; 1 0.844847 5.745121 1.838606; 6 1.322966 4.404651 3.451910; 6 2.384782 3.734162 4.092083; 1 2.161532 3.116195 4.959365; 6 3.700264 3.829893 3.640957; 6 3.971891 4.613992 2.506571; 1 4.994710 4.690832 2.140581; 6 3.248543 6.162731 0.638674; 1 2.998879 7.215214 0.826310; 1 2.663313 5.847879 -0.234782; 1 4.307606 6.117184 0.364050; 6 -0.078316 4.347801 3.992296; 6 4.824589 3.114055 4.356994; 1 5.522331 3.824531 4.819974; 1 5.412336 2.494947 3.667430; 1 4.442459 2.462202 5.149618; 1 -0.721557 5.019342 3.409725; 1 -0.051177 4.734400 5.006498; 1 -0.130701 2.192126 5.442544; 77 -2.075324 4.246731 8.550145; 6 -3.689608 3.454791 9.895776; 6 -3.983679 4.835572 9.585696; 6 -2.445544 3.449191 10.633778; 6 -4.594702 2.275713 9.678789; 6 -2.972795 5.669735 10.195891; 6 -5.231432 5.331900 8.910849; 6 -2.026383 4.814725 10.842509; 6 -1.812833 2.236665 11.254891; 1 -5.235368 2.415174 8.803306; 1 -5.252810 2.116099 10.546379; 1 -4.026090 1.353633 9.523823; 6 -2.956752 7.171274 10.198125; 1 -5.055170 6.270447 8.376433; 1 -6.028062 5.515167 9.645790; 1 -5.609048 4.605583 8.185805; 6 -0.837656 5.256242 11.647501; 1 -1.995114 1.339440 10.656058; 1 -2.222226 2.053287 12.258379; 1 -0.729548 2.359204 11.357468; 1 -1.936200 7.564167 10.247737; 1 -3.505761 7.573981 11.061391; 1 -3.423868 7.500199 9.296979; 1 -0.035140 4.512918 11.620919; 1 -1.106803 5.408419 12.702721; 1 -0.426185 6.200217 11.276424; 6 -1.213796 5.227054 6.837513; 6 -2.373782 4.514960 6.360079; 6 -0.246716 4.367141 7.456441; 6 -2.335639 3.151018 5.714553; 1 -3.210993 5.145104 6.057496; 6 -0.603139 2.964975 7.517663; 1 0.665205 4.760052 7.898752; 6 -1.317649 2.324089 6.348673; 1 -1.575221 1.281123 6.537207; 6 -3.741750 2.575950 5.616638; 1 -4.347248 3.122973 4.884626; 1 -3.730933 1.522299 5.328456; 1 -4.246490 2.655570 6.590804; 6 0.316488 2.040132 8.287671; 1 0.767798 2.548949 9.145794; 1 -0.220178 1.160995 8.663278; 1 1.132834 1.673539 7.645837; 6 -1.029152 6.716681 6.718523; 1 -0.559544 6.968238 5.758679; 1 -1.993868 7.234089 6.761261; 1 -0.392458 7.108045 7.519865;</p> |
| 12       | <p>77 -1.592528 2.948754 3.856622; 6 -3.182969 1.949644 2.595914; 6 -1.860293 1.981560 1.938200; 6 -1.584077 3.339204 1.542004; 6 -2.579714 4.141560 2.172182; 6 -3.623994 3.284580 2.732269; 6 -4.945329 3.775148 3.247060; 6 -2.660286 5.638203 2.118616; 6 -0.489632 3.811647 0.635243; 6 -1.115105 0.766511 1.471988; 6 -3.940667 0.691970 2.895994; 1 0.388866 3.164751 0.684225; 1 -0.156245 4.820821 0.889937; 1 -0.839361 3.828088 -0.407563; 1 -0.049243 0.979507 1.355913; 1 -1.500690 0.426790 0.499806; 1 -1.219164 -0.060602 2.180403; 1 -3.289098 -0.074769 3.325828; 1 -4.369602 0.280283 1.971272; 1 -4.759671 0.863212 3.597970; 1 -4.829469 4.623770 3.929987; 1 -5.487887 2.991870 3.782696; 1 -5.585627 4.110583 2.418802; 1 -1.670051 6.086964 2.003860; 1 -3.114294 6.046108 3.026700; 1 -3.275785 5.961321 1.267025; 6 2.697494 5.163398 2.225053; 6 1.736719 4.727197 3.140063; 1 1.181360 5.464028 3.718730; 6 1.465728 3.361581 3.345563; 6 2.211301 2.436686 2.596738; 1 2.041380 1.372619 2.757592; 6 3.180587 2.839260 1.667571; 6 3.407843 4.206737 1.484658; 1 4.155966 4.534023 0.764153; 6 2.990635 6.637313 2.048965; 1 3.923932 6.922168 2.553322; 1 2.191466 7.258563 2.467332; 1 3.105779 6.901942 0.991020; 6 0.460848 2.911461 4.361444; 6 3.992322 1.812924 0.908038; 1 4.864074 1.484129 1.490194; 1 4.368516 2.218042 -0.037786; 1 3.401725 0.917822 0.681817; 1 0.568999 3.517176 5.269160; 1 0.682954 1.876779 4.649911; 1 -0.157608 1.597954 6.409145; 77 -2.190627 4.410949 8.483622; 6 -3.859162 3.841346 9.877629; 6 -4.236897 5.055970 9.184962; 6 -2.700640 4.156115 10.679008; 6 -4.641548 2.559750 9.917919; 6 -3.356453 6.116140 9.606178; 6 -5.450600 5.219115 8.313898; 6 -2.401712 5.559601 10.518953; 6 -2.044435 3.228437 11.660910; 1 -5.190345 2.394116 8.986355; 1 -5.376406 2.568547 10.737193; 1 -3.989258 1.694428 10.070383; 6 -3.455129 7.559127 9.201569; 1 -5.306723 6.004518 7.565109; 1 -6.331695 5.492164 8.912057; 1 -5.685696 4.293444 7.780865; 6 -1.335021 6.319814 11.253941; 1 -2.098064 2.187823 11.327561; 1 -2.536686 3.286977 12.642176; 1 -0.988218 3.472556 11.807811; 1 -2.473321 8.043430 9.190254; 1 -4.092061 8.126064 9.895837; 1 -3.887507 7.668703 8.201993; 1 -0.478722 5.682202 11.493317; 1 -1.717700 6.723090 12.202917; 1 -0.963470 7.165460 10.666523; 6 -1.242002 4.981837 6.650868; 6 -2.307490 4.065198 6.292551; 6 -0.273802 4.386270 7.529443; 6 -2.076568 2.604146 5.919971; 1 -3.180524 4.529159 5.832358; 6 -0.580892 3.035505 7.952297; 1 0.558976 4.962584 7.926534; 6 -1.040042 2.016161 6.907873; 1 -1.496784 1.173567 7.446466; 6 -3.388628 1.821797 6.071776; 1 -4.209486 2.274262 5.506218; 1 -3.272329 0.785974 5.732422; 1 -3.690857 1.795745 7.129028; 6 0.287478 2.438045 9.041751; 1 0.626692 3.197252 9.755308; 1 -0.253267 1.666293 9.602097; 1 1.179222 1.957345 8.610378; 6 -1.135357 6.395026 6.145570; 1 -0.628831 6.419886 5.170589; 1 -2.128438 6.839265 6.012182; 1 -0.567988 7.028069 6.837546;</p>       |
| 12-13_ts | <p>77 -1.773499 4.308289 3.500316; 6 -4.073679 4.451044 2.791850; 6 -3.299699 3.844828 1.737764; 6 -2.291983 4.766469 1.317823; 6 -2.417013 5.959906 2.147682; 6 -3.543131 5.764286 3.021342; 6 -4.133260 6.817199 3.910936; 6 -1.694067 7.257486 1.922167; 6 -1.391288 4.627089 0.124722; 6 -3.571673 2.496656 1.132069; 6 -5.306613 3.860576 3.416175; 1 -1.215459 3.577591 -0.130533; 1 -0.415208 5.092403 0.293406; 1 -1.832832 5.111980 -0.757970; 1 -2.673301 2.070180 0.677239; 1 -4.338411 2.567555 0.347657; 1 -3.935255 1.784594 1.879465; 1 -5.220204 2.775114 3.533967; 1 -6.198708 4.048835 2.801164; 1 -5.501189 4.283959 4.406001; 1 -3.359790 7.403242 4.415722; 1 -4.774683 6.380695 4.678268; 1 -4.748387 7.513684 3.323168; 1 -0.645926 7.095486 1.652841; 1 -1.708690 7.883283 2.819478; 1 -2.158865 7.831266 1.107308; 6 2.158659 1.415073 2.546352; 6 1.254715 2.474836 2.490083; 1 0.488491 2.480231 1.717513; 6 1.296115 3.544199 3.407731; 6 2.294083 3.509672 4.390535; 1 2.368952 4.336157 5.094861; 6 3.215201 2.453168 4.482391; 6 3.134989 1.412772 3.557038; 1 3.843609 0.587869 3.615019; 6 2.108613 0.292192 1.533828; 1 2.980266 0.314868 0.866116; 1 1.212252 0.357517 0.908095; 1 2.106511 -0.690530 2.021620; 6 0.328757 4.693916 3.309209; 6 4.268794 2.452232 5.567855; 1 4.858695 3.377345 5.555146; 1 4.961941 1.612376 5.452515; 1 3.818085 2.375808 6.566234; 1 0.408813 5.118952 2.301310; 1 0.626751 5.484023 4.005201; 1 -0.189436 5.925268 5.898785; 77 -2.458257 4.035879 8.581243; 6 -2.137372 1.931901 9.285784; 6 -3.557349 2.132720 9.096563; 6 -1.725248 2.821017 10.349161; 6 -1.291434 0.874405 8.635690; 6 -4.019388 3.088337 10.073356; 6 -4.432758 1.345386 8.162348; 6 -2.889524 3.515271 10.842481; 6 -0.356165 2.860933 10.965511; 1 -1.638546 0.647475 7.623248; 1 -1.313123 -0.063871 9.209974; 1 -0.246385 1.189004 8.557708; 6 -5.444392 3.512380 10.285616; 1 -5.297182 1.928897 7.830127; 1 -4.815632 0.438582 8.651604; 1 -3.883553 1.031050 7.269917; 6 -2.922551 4.456966 12.012290; 1 0.420890 2.634060 10.229793; 1 -0.270863 2.122099 11.774932; 1 -0.129529 3.843097 11.390921; 1 -5.508701 4.537558 10.664656; 1 -5.950133 2.862317 11.014142; 1 -6.020846 3.467921 9.356294; 1 -1.969161 4.979257 12.136033; 1 -3.123816 3.918443 12.949821; 1 -3.703117 5.216096 11.898796; 6 -</p>                                                                                                                                                                                                                                                                                                                                                                                                                                                                                                                                                                                                                                                                        |



|          |                                                                                                                                                                                                                                                                                                                                                                                                                                                                                                                                                                                                                                                                                                                                                                                                                                                                                                                                                                                                                                                                                                                                                                                                                                                                                                                                                                                                                                                                                                                                                                                                                                                                                                                                                                                                                                                                                                                                                                                                                                                                                                                                                                                                                                                                                                                                                                                                                                                                                                                                                                                                                                                                                                                                                                                                                                                                                                                                                                                                                                                              |
|----------|--------------------------------------------------------------------------------------------------------------------------------------------------------------------------------------------------------------------------------------------------------------------------------------------------------------------------------------------------------------------------------------------------------------------------------------------------------------------------------------------------------------------------------------------------------------------------------------------------------------------------------------------------------------------------------------------------------------------------------------------------------------------------------------------------------------------------------------------------------------------------------------------------------------------------------------------------------------------------------------------------------------------------------------------------------------------------------------------------------------------------------------------------------------------------------------------------------------------------------------------------------------------------------------------------------------------------------------------------------------------------------------------------------------------------------------------------------------------------------------------------------------------------------------------------------------------------------------------------------------------------------------------------------------------------------------------------------------------------------------------------------------------------------------------------------------------------------------------------------------------------------------------------------------------------------------------------------------------------------------------------------------------------------------------------------------------------------------------------------------------------------------------------------------------------------------------------------------------------------------------------------------------------------------------------------------------------------------------------------------------------------------------------------------------------------------------------------------------------------------------------------------------------------------------------------------------------------------------------------------------------------------------------------------------------------------------------------------------------------------------------------------------------------------------------------------------------------------------------------------------------------------------------------------------------------------------------------------------------------------------------------------------------------------------------------------|
|          | 3.168571 5.616149 7.303605; 6 -2.875985 4.460173 6.473981; 6 -2.035006 6.063875 8.064426; 6 -1.606113 4.275773 5.691185; 1 -3.747295 3.950904 6.062425; 6 -0.827241 5.295144 7.852133; 1 -2.124038 6.862729 8.797393; 6 -0.453527 4.982559 6.400540; 1 0.446794 4.359201 6.378893; 6 -1.397878 2.913485 5.192722; 1 -2.192265 2.191592 5.382211; 1 -1.263260 2.748038 3.759978; 1 -0.400009 2.494133 5.328020; 6 0.360615 5.593888 8.743167; 1 0.048546 5.886677 9.751886; 1 1.019631 4.722563 8.833727; 1 0.966836 6.413366 8.325848; 6 -4.531281 6.240185 7.464899; 1 -4.652922 7.109380 6.806041; 1 -5.324665 5.524318 7.221512; 1 -4.687539 6.581561 8.494586;                                                                                                                                                                                                                                                                                                                                                                                                                                                                                                                                                                                                                                                                                                                                                                                                                                                                                                                                                                                                                                                                                                                                                                                                                                                                                                                                                                                                                                                                                                                                                                                                                                                                                                                                                                                                                                                                                                                                                                                                                                                                                                                                                                                                                                                                                                                                                                                           |
| 13       | 77 0.563180 2.308577 1.238754; 6 0.518226 3.373724 -1.719423; 6 0.960561 4.599043 -2.236930; 6 2.621977 1.668756 2.062710; 6 1.937822 2.178956 3.205191; 6 1.663690 3.583377 2.975963; 6 2.199873 3.943665 1.708868; 6 2.757814 2.751536 1.099939; 6 3.617024 2.721129 -0.133160; 6 2.264145 5.327540 1.133085; 6 1.033052 4.510781 3.974674; 6 1.709554 1.462074 4.505344; 6 3.231121 0.300801 1.929178; 1 0.713962 5.515858 -1.703470; 6 1.685742 4.685943 -3.437110; 6 2.138055 6.031338 -3.960553; 6 1.962408 3.511412 -4.136313; 1 2.523365 3.562130 -5.068365; 6 1.520678 2.264131 -3.662341; 6 1.814666 1.005145 -4.447945; 6 0.810260 2.214008 -2.464296; 1 0.475817 1.251565 -2.083879; 6 -0.291754 3.315837 -0.453668; 1 0.221092 4.023603 4.525304; 1 0.618958 5.401300 3.493171; 1 1.768567 4.849275 4.718359; 1 0.765165 1.754230 4.975065; 1 2.512740 1.693072 5.219990; 1 1.693266 0.376626 4.375707; 1 2.654837 -0.454352 2.472016; 1 4.254926 0.288421 2.329657; 1 3.281527 -0.011995 0.882968; 1 3.256087 3.417446 -0.893821; 1 3.627253 1.726297 -1.695629; 1 4.655836 2.989659 0.108405; 1 1.427541 5.948230 1.469655; 1 2.247016 5.305261 0.040965; 1 3.191895 5.831119 1.439794; 1 -1.246264 2.828130 -0.672607; 1 -0.522626 4.337110 -0.124918; 1 0.519102 1.125121 0.179767; 1 1.435996 0.115987 -3.933327; 1 2.892926 0.868876 -4.601248; 1 1.352935 1.035926 -5.443496; 1 2.760076 6.561433 -3.228034; 1 1.282914 6.682840 -4.182892; 1 2.722911 5.926624 -4.880309; 6 -1.987829 -1.102532 2.694800; 6 -1.114251 0.132052 2.921420; 1 -0.066220 -0.185374 3.000414; 6 -1.319813 1.134616 1.787324; 6 -2.082169 0.522006 0.663152; 1 -2.337087 1.198932 -0.148709; 6 -1.923571 -0.869343 0.279199; 6 -1.879710 -1.755137 1.405523; 1 -1.864197 -2.835221 1.276862; 6 -2.133012 -1.983432 3.918652; 1 -2.641472 -1.453703 4.732820; 1 -1.146887 -2.291445 4.301138; 1 -2.705520 -2.891381 3.698717; 6 -1.430168 2.532003 2.034520; 6 -1.848832 -1.342666 -1.146430; 1 -2.226535 -2.366145 -1.253092; 1 -0.808018 -1.328626 -1.498743; 1 -2.426847 -0.690109 -1.809631; 1 -1.374796 2.884394 0.064441; 1 -2.076759 3.135395 1.399531; 1 -5.155488 -0.697900 4.761855; 6 -5.692401 -1.393678 4.110396; 6 -5.609700 -0.973904 2.670853; 1 -5.267575 -2.389176 4.269293; 1 -6.737962 -1.422585 4.448209; 6 -5.551852 0.390276 2.198795; 6 -5.748672 -1.846982 1.531548; 6 -5.617863 0.340510 0.751806; 6 -5.599926 1.629794 3.046092; 6 -5.763624 -1.034856 0.349086; 6 -5.939298 -3.336145 1.580284; 77 -3.723337 -0.656225 1.450498; 6 -5.692131 1.536421 -0.155373; 1 -5.120461 1.469541 4.016511; 1 -6.637169 1.943489 3.236403; 1 -5.085204 2.465708 2.563103; 6 -5.957729 -1.528045 -1.056037; 1 -5.516799 -3.825968 0.697212; 1 -7.006294 -3.599171 1.621973; 1 -5.461401 -3.774357 2.461587; 1 -5.119142 2.377331 0.245982; 1 -6.731468 1.871794 -0.279417; 1 -5.297605 1.314250 -1.151687; 1 -5.486197 -0.862474 -1.785346; 1 -7.025318 -1.588865 -1.311888; 1 -5.531203 -2.526558 -1.195865; 1 -1.377262 0.596621 3.881153;    |
| 13-14_ts | 77 0.466031 2.449730 1.413536; 6 0.332692 3.485600 -1.851100; 6 0.770060 4.743589 -2.277757; 6 2.435526 1.562678 2.170701; 6 1.758842 2.320436 3.214699; 6 1.835505 3.735842 2.867825; 6 2.431314 3.831921 1.592064; 6 2.770366 2.486412 1.136803; 6 3.538119 2.181996 -0.119538; 6 2.741295 5.090753 0.836415; 6 1.392668 4.864347 3.753479; 6 1.444437 1.822447 4.599101; 6 2.816993 0.111632 2.232308; 1 0.556022 5.616053 -1.662967; 6 1.462658 4.910542 -3.487940; 6 1.911155 6.286005 -3.928295; 6 1.714532 3.784028 -4.272102; 1 2.252713 3.898740 -5.211637; 6 1.288341 2.505408 -3.876765; 6 1.569466 1.303311 -4.749970; 6 0.604182 2.374129 -2.668174; 1 0.277143 1.387175 -2.345709; 6 -0.454468 3.339577 -0.574374; 1 0.475680 4.613470 4.296126; 1 1.197487 5.776354 3.181165; 1 2.159803 5.104558 4.504352; 1 0.568286 2.323697 5.022506; 1 2.290455 2.013345 5.274982; 1 1.250098 0.747834 4.614057; 1 2.077777 -0.481231 2.778769; 1 3.783305 -0.019910 2.741704; 1 2.909147 -0.321090 1.231881; 1 3.191741 2.786900 -0.962527; 1 3.433019 1.131642 -0.406108; 1 4.610764 2.383875 0.015302; 1 2.127492 5.930030 1.178770; 1 2.572794 4.968335 -0.237901; 1 3.794079 5.378145 0.970169; 1 -1.470017 2.985003 -0.773813; 1 -0.544801 4.299947 -0.066515; 1 0.011816 2.096674 -0.143896; 1 1.209233 0.379483 -4.286361; 1 2.644228 1.186785 -4.937530; 1 1.082318 1.397338 -5.728974; 1 2.521915 6.775064 -3.159325; 1 1.053455 6.943253 -4.121242; 1 2.504999 6.237929 -4.846669; 6 -1.947051 -1.094177 2.720202; 6 -1.111211 0.157906 2.991225; 1 -0.064869 -0.152006 3.110274; 6 -1.280962 1.179496 1.864654; 6 -2.023834 0.559178 0.724255; 1 -2.297645 1.238814 -0.080172; 6 -1.824868 -0.819345 0.313432; 6 -1.786017 -1.725016 1.425385; 1 -1.735665 -2.802039 1.280171; 6 -2.103021 -1.998805 3.925785; 1 -2.649472 -1.496423 4.732683; 1 -1.119996 -2.285006 4.332796; 1 -2.642876 -2.919072 3.675787; 6 -1.502152 2.578530 2.164514; 6 -1.703273 -1.265740 -1.118107; 1 -2.048126 -2.297737 -1.252067; 1 -0.655315 -1.217185 -1.447176; 1 -2.286964 -0.619972 -1.783694; 1 -1.540962 2.882946 3.211852; 1 -2.200670 3.139726 1.539102; 1 -5.158490 -0.792770 4.710460; 6 -5.674110 -1.488866 4.042316; 6 -5.568796 -1.053830 2.608700; 1 -5.238941 -2.480187 4.199771; 1 -6.725384 -1.534963 4.360238; 6 -5.528812 0.315916 2.151318; 6 -5.665582 -1.918392 1.458979; 6 -5.559474 0.278545 0.703140; 6 -5.624051 1.545106 3.009799; 6 -5.668292 -1.095935 0.284676; 6 -5.826487 -3.411614 1.490340; 77 -3.657666 -0.680847 1.437267; 6 -5.639750 1.480941 -0.195000; 1 -5.161030 1.385759 3.988283; 1 -6.672244 1.832787 3.181436; 1 -5.117814 2.397459 2.547171; 6 -5.819038 -1.579646 -1.129125; 1 -5.378763 -3.884400 0.610298; 1 -6.888288 -3.697773 1.511168; 1 -5.354632 -3.848678 2.375561; 1 -5.098552 2.331467 0.229807; 1 -6.683122 1.792790 -0.345056; 1 -5.213157 1.277614 -1.182360; 1 -5.344973 -0.897029 -1.841034; 1 -6.878555 -1.661619 -1.411832; 1 -5.367041 -2.567155 -1.267799; 1 -1.416652 0.601196 3.948471; |
| 14       | 77 0.305034 2.503580 1.515414; 6 2.424639 1.670174 1.525212; 6 2.120495 2.665099 2.566915; 6 2.030519 3.991421 1.930028; 6 2.051468 3.769733 0.543659; 6 2.278027 2.336276 0.291363; 6 2.432364 1.739120 -1.077032; 6 1.914212 4.800160 -0.538085; 6 1.934347 5.301630 2.653533; 6 2.276518 2.436241 4.041513; 6 2.831133 0.245944 1.761726; 1 1.339564 5.212376 3.567612; 1 1.465867 6.070728 2.032058; 1 2.929839 5.669900 2.943096; 1 1.676335 3.145249 4.619115; 1 3.327021 2.560494 4.342898; 1 1.964466 1.426032 4.322278; 1 2.323537 -0.177641 2.633800; 1 3.913920 0.166703 1.940330; 1 2.590505 -0.388378 0.903310; 1 1.695979 2.146364 -1.777851; 1 2.305343 0.652846 -1.056960; 1 3.428323 1.950897 -1.492503; 1 1.467280 5.723764 -0.159518; 1 1.284510 4.438843 -1.358053; 1 2.893266 5.055099 -0.969170; 6 -1.942939 -1.034501 2.678744; 6 -1.236053 0.239478 3.144961; 1 -0.188854 0.002104 3.392212; 6 -1.342625 1.333818 2.087309; 6 -2.047599 0.830620 0.860684; 1 -2.329809 1.592873 0.132073; 6 -1.779466 -0.485346 0.311273; 6 -1.704223 -1.497027 1.326226; 1 -1.587585 -2.547429 1.067617; 6 -2.075408 -2.088764 3.759562; 1 -2.679112 -1.724446 4.598924; 1 -1.088426 -2.359033 4.167331; 1 -2.543594 -3.003756 3.379922; 6 -1.544051 2.739909 2.436916; 6 -1.602977 -0.772324 -1.154659; 1 -1.882573 -1.803194 -1.401604; 1 -0.554860 -0.625554 -1.451777; 1 -2.213510 -0.096111 -1.763500; 1 -1.548776 3.034798 3.486972; 1 -2.255548                                                                                                                                                                                                                                                                                                                                                                                                                                                                                                                                                                                                                                                                                                                                                                                                                                                                                                                                                                                                                                                                                                                                                                                                                                                                                                                                                                                                                                                                                                                                                                                              |

|          |                                                                                                                                                                                                                                                                                                                                                                                                                                                                                                                                                                                                                                                                                                                                                                                                                                                                                                                                                                                                                                                                                                                                                                                                                                                                                                                                                                                                                                                                                                                                                                                                                                                                                                                                                                                                                                                                                                                                                                                                                                                                                                                                                                                                                                                                                                                                                                                    |
|----------|------------------------------------------------------------------------------------------------------------------------------------------------------------------------------------------------------------------------------------------------------------------------------------------------------------------------------------------------------------------------------------------------------------------------------------------------------------------------------------------------------------------------------------------------------------------------------------------------------------------------------------------------------------------------------------------------------------------------------------------------------------------------------------------------------------------------------------------------------------------------------------------------------------------------------------------------------------------------------------------------------------------------------------------------------------------------------------------------------------------------------------------------------------------------------------------------------------------------------------------------------------------------------------------------------------------------------------------------------------------------------------------------------------------------------------------------------------------------------------------------------------------------------------------------------------------------------------------------------------------------------------------------------------------------------------------------------------------------------------------------------------------------------------------------------------------------------------------------------------------------------------------------------------------------------------------------------------------------------------------------------------------------------------------------------------------------------------------------------------------------------------------------------------------------------------------------------------------------------------------------------------------------------------------------------------------------------------------------------------------------------------|
|          | 3.321194 1.839501; 1 -5.221250 -1.256066 4.554158; 6 -5.675662 -1.870687 3.771491; 6 -5.554892 -1.221245 2.422835; 1 -5.187938 -2.849641 3.796741; 1 -6.731167 -2.020139 4.039755; 6 -5.587117 0.201223 2.173510; 6 -5.565757 -1.908879 1.154835; 6 -5.575071 0.378438 0.735218; 6 -5.779529 1.282020 3.199142; 6 -5.587059 -0.921877 0.114876; 6 -5.637852 -3.396408 0.959380; 77 -3.640663 -0.570933 1.387296; 6 -5.704372 1.694720 0.021488; 1 -5.340031 1.002240 4.161310; 1 -6.847365 1.486366 3.369183; 1 -5.307446 2.218322 2.887694; 6 -5.665993 -1.196218 -1.359550; 1 -5.133455 -3.707654 0.039005; 1 -6.681047 -3.738594 0.892809; 1 -5.171768 -3.935063 1.789882; 1 -5.235150 2.503017 0.589649; 1 -6.760868 1.960733 -0.125208; 1 -5.232674 1.667741 -0.965879; 1 -5.212118 -0.389617 -1.943576; 1 -6.709573 -1.292839 -1.692341; 1 -5.151294 -2.125345 -1.625113; 1 -1.702881 0.582980 4.079317;                                                                                                                                                                                                                                                                                                                                                                                                                                                                                                                                                                                                                                                                                                                                                                                                                                                                                                                                                                                                                                                                                                                                                                                                                                                                                                                                                                                                                                                                     |
| 14-15_ts | 77 0.214568 2.604051 1.832602; 6 2.120109 1.843033 0.611832; 6 2.361186 1.550645 1.978947; 6 2.312940 2.804441 2.720187; 6 2.087583 3.876536 1.802218; 6 1.860557 3.266341 0.501287; 6 1.694779 4.018700 -0.789476; 6 2.167907 5.347872 2.090145; 6 2.641243 2.952419 4.180250; 6 2.701436 0.209341 2.563968; 6 2.168761 0.878057 -0.536321; 1 2.279432 2.100218 4.763783; 1 2.189782 3.855271 4.601466; 1 3.727825 3.019220 4.334768; 1 2.337341 0.116521 3.591906; 1 3.788917 0.044549 2.589535; 1 2.259706 -0.608196 1.985143; 1 2.007943 -0.151691 -0.203142; 1 3.147110 0.909637 -1.038476; 1 1.410152 1.107173 -1.291468; 1 1.146285 4.953039 -0.637938; 1 1.144248 3.430010 -1.530439; 1 2.670504 4.273535 -1.228187; 1 1.907673 5.568933 3.129664; 1 1.485198 5.919595 1.454398; 1 3.184155 5.733360 1.913526; 6 -1.954709 0.208123 2.885651; 6 -1.763414 1.676521 2.650571; 1 -0.630599 2.411332 3.288502; 6 -1.725297 2.039616 1.243465; 6 -2.112474 0.919267 0.340662; 1 -2.357610 1.186710 -0.686519; 6 -1.533012 -0.395534 0.544119; 6 -1.434841 -0.747134 1.930425; 1 -1.081345 -1.729163 2.235249; 6 -2.045013 -0.216137 4.336119; 1 -2.834179 0.331311 4.864379; 1 -1.099825 -0.010028 4.860930; 1 -2.257461 -1.286325 4.431099; 6 -1.572746 3.457597 1.012371; 6 -1.093032 -1.310098 -0.567492; 1 -1.165661 -2.363767 -0.274427; 1 -0.051458 -1.107279 -0.846819; 1 -1.707757 -1.159998 -1.461957; 1 -2.094503 4.163444 1.662162; 1 -1.497518 3.797459 -0.021186; 1 -5.494470 0.299471 4.326203; 6 -5.661734 -0.728517 3.991684; 6 -5.422634 -0.872068 2.515841; 6 -1.5002925 -1.378019 4.575634; 1 -6.697498 -0.994481 4.245360; 6 -5.660556 0.152111 1.526749; 6 -5.093058 -2.103980 1.837017; 6 -5.405216 -0.449806 0.233032; 6 -6.230564 1.519912 1.772931; 6 -5.090562 -1.845030 0.430413; 6 -4.870893 -3.436729 2.493251; 77 -3.500009 -0.403723 1.412519; 6 -5.627259 0.219442 -1.094148; 1 -5.939053 1.904987 2.754603; 1 -7.330198 1.506022 1.735381; 1 -5.882595 2.238935 1.025664; 6 -4.850351 -2.854950 -0.654335; 1 -4.182641 -4.062120 1.915780; 1 -5.814205 -3.993248 2.591883; 1 -4.453202 -3.326449 3.498573; 1 -5.421506 1.292188 -1.038774; 1 -6.668040 0.096744 -1.425560; 1 -4.982990 -0.201460 -1.872321; 1 -4.426166 -2.390522 -1.549672; 1 -5.786989 -3.346191 -0.954540; 1 -4.159406 -3.639631 -0.329813; 1 -2.398890 2.293723 3.294157; |
| 15       | 77 -0.683994 1.281219 3.520580; 6 0.420459 3.093681 2.928048; 6 1.051762 1.990391 2.241653; 6 1.722493 1.182149 3.246866; 6 1.475033 1.752966 4.519647; 6 0.647058 2.934256 4.345316; 6 0.310177 3.929680 5.419330; 6 1.996652 1.264525 5.840542; 6 2.562931 -0.026979 2.951600; 6 1.212964 1.846026 0.754559; 6 -0.208413 4.290446 2.270310; 1 2.142742 -0.617262 2.130732; 1 2.651592 -0.684807 3.821841; 1 3.581690 0.261411 2.655418; 1 1.261066 0.794140 4.455462; 1 2.136229 2.331045 0.402404; 1 0.375541 2.299911 0.217369; 1 -0.673828 4.024635 1.317336; 1 0.548648 5.062343 2.072160; 1 -0.982093 4.733961 2.902935; 1 0.092357 3.435734 6.371602; 1 -0.568677 4.522630 5.151118; 1 1.142238 4.629058 5.593507; 1 2.269825 0.205345 5.805341; 1 1.254923 1.390784 6.636077; 1 2.894022 1.823330 6.142063; 6 -1.950562 -1.278520 1.726097; 6 -1.242208 -0.814479 2.966871; 1 -0.352496 -1.382585 3.237476; 6 -2.130809 -0.356162 3.977445; 6 -3.562560 -0.343017 3.562261; 1 -4.271082 -0.079038 4.346251; 6 -3.935686 0.043857 2.210486; 6 -3.051277 -0.491476 1.223049; 1 -3.247414 -0.363813 0.161067; 6 -1.092971 -2.021550 0.724887; 1 -0.631339 -2.908924 1.173417; 1 -0.277486 -1.377579 0.362468; 1 -1.675433 -0.143079; 6 -1.625511 0.196384 5.188102; 6 -5.107286 0.928271 1.887262; 1 -5.495043 0.732529 0.881169; 1 -4.806114 1.983425 1.936263; 1 -5.921653 0.782362 2.605516; 1 -0.800792 -0.297466 5.701205; 1 -2.332457 0.693448 5.848642; 1 -2.053638 1.889851 2.988184; 1 -1.949529 -5.078730 2.055279; 6 -2.829341 -5.147775 1.408891; 6 -3.967809 -4.326892 1.943025; 1 -2.529633 -4.824572 0.407634; 1 -3.110742 -6.208309 1.343384; 6 -4.241029 -4.082063 3.336906; 6 -5.065552 -3.803746 1.158884; 6 -5.490457 -3.345737 3.395205; 6 -3.478276 -4.630297 4.509026; 6 -6.012279 -3.219187 2.056879; 6 -5.221409 -3.937277 -0.329223; 77 -3.943128 -2.101956 2.345130; 6 -6.210865 -2.960982 4.656791; 1 -2.415554 -4.746896 4.276368; 1 -3.862527 -5.616860 4.809021; 1 -3.550248 -3.969764 5.378130; 6 -7.328201 -2.602526 1.679245; 1 -5.793852 -3.105410 -0.751814; 1 -5.748966 -4.865541 -0.592360; 1 -4.251320 -3.960872 -0.834642; 1 -5.507883 -2.731074 5.462584; 1 -6.858632 -3.778351 5.003931; 1 -6.843729 -2.080403 4.508588; 1 -7.618631 -1.813508 2.379785; 1 -8.133551 -3.351079 1.678778; 1 -7.294038 -2.159454 0.678782;           |
| 15-9_ts  | 77 5.799828 2.077308 5.603787; 77 7.843559 2.369835 1.745132; 6 9.107930 3.179123 0.266383; 6 9.430759 1.743384 0.253435; 6 8.261589 1.066814 -0.166692; 6 7.250136 2.058382 -0.539713; 6 7.778458 3.349609 -0.340672; 6 6.362657 2.638043 7.708168; 6 6.307258 1.197600 7.633288; 6 4.939071 0.798563 7.398961; 6 4.150290 1.984310 7.273803; 6 5.026800 3.123578 7.438230; 6 7.145686 4.662928 -0.696941; 6 10.770573 1.146555 0.569676; 6 10.106638 4.281883 0.468336; 6 5.894325 1.715907 -1.085968; 6 8.086457 -0.417591 -0.312437; 6 2.661152 2.042946 7.086450; 6 4.587005 4.556037 7.540247; 6 4.432308 9.614125 7.345683; 6 7.534123 3.466579 8.152905; 6 7.448078 0.264548 7.928305; 1 7.462824 4.998984 -1.695531; 1 7.421717 5.446215 0.015205; 1 6.053464 4.596001 -0.703245; 1 11.279364 1.702430 1.363048; 1 11.426976 1.156408 -0.313341; 1 10.680526 0.107786 0.901907; 1 9.618758 5.207529 0.787635; 1 10.648903 4.493739 -0.465087; 1 10.845533 4.014532 1.229840; 1 5.440518 0.879314 -0.543482; 1 5.954622 1.420280 -2.143468; 1 5.207345 2.564471 -1.019282; 1 8.812402 -0.968667 0.292488; 1 8.215969 -0.734582 -1.357679; 1 7.086496 -0.737566 -0.000312; 1 2.138525 2.041425 8.054137; 1 2.291625 1.185601 6.514831; 1 2.358064 2.949889 6.554647; 1 5.380774 5.242153 7.230786; 1 4.315487 4.808932 8.575195; 1 3.714003 4.758352 6.912502; 1 3.549429 -0.702117 6.704316; 1 4.148416 -0.975710 8.344659; 1 5.191540 -1.300283 6.957038; 1 8.484559 2.997667 7.881309; 1 7.533839 3.604638 9.244885; 1 7.519250 4.460599 7.695705; 1 7.350911 -0.678442 7.381281; 1 7.488740 0.020754 8.999588; 1 8.408892 0.708291 7.652719; 6 5.292561 -0.190364 3.318695; 6 5.908181 1.137043 3.673542; 6 5.186784 2.382727 3.600757; 6 7.281620 1.272416 4.169900; 6 5.984799 3.540661 3.928547; 1 4.138510 2.417883 3.314131; 6 8.210018 2.384179 3.760881; 1 7.766329 0.328439 4.419323; 6 7.422703 3.565358 3.440076; 1 7.900437 4.544065 3.496860; 6 5.299446 4.886737 4.000313; 1 5.815326 5.562417 4.692644; 1 5.304420 5.370643 3.011851; 1 4.258100 4.797582 4.328382; 6 9.564155 4.222990 4.424494; 1 10.167959 3.243122 4.019683; 1 9.467232 2.578816 5.509813; 1 10.117820 1.488270 4.266767; 1 4.206814 -0.176234 3.465719; 1 5.711154 -0.996900 3.930838; 1 5.488585 -0.438587 2.266423;                                                                |
| 9        | 77 5.799828 2.077308 5.603787; 77 7.843559 2.369835 1.745132; 6 9.107930 3.179123 0.266383; 6 9.430759                                                                                                                                                                                                                                                                                                                                                                                                                                                                                                                                                                                                                                                                                                                                                                                                                                                                                                                                                                                                                                                                                                                                                                                                                                                                                                                                                                                                                                                                                                                                                                                                                                                                                                                                                                                                                                                                                                                                                                                                                                                                                                                                                                                                                                                                             |

|          |                                                                                                                                                                                                                                                                                                                                                                                                                                                                                                                                                                                                                                                                                                                                                                                                                                                                                                                                                                                                                                                                                                                                                                                                                                                                                                                                                                                                                                                                                                                                                                                                                                                                                                                                                                                                                                                                                                                                                                                                                                                                                                                                                                                                                                                                                                                                                                                               |
|----------|-----------------------------------------------------------------------------------------------------------------------------------------------------------------------------------------------------------------------------------------------------------------------------------------------------------------------------------------------------------------------------------------------------------------------------------------------------------------------------------------------------------------------------------------------------------------------------------------------------------------------------------------------------------------------------------------------------------------------------------------------------------------------------------------------------------------------------------------------------------------------------------------------------------------------------------------------------------------------------------------------------------------------------------------------------------------------------------------------------------------------------------------------------------------------------------------------------------------------------------------------------------------------------------------------------------------------------------------------------------------------------------------------------------------------------------------------------------------------------------------------------------------------------------------------------------------------------------------------------------------------------------------------------------------------------------------------------------------------------------------------------------------------------------------------------------------------------------------------------------------------------------------------------------------------------------------------------------------------------------------------------------------------------------------------------------------------------------------------------------------------------------------------------------------------------------------------------------------------------------------------------------------------------------------------------------------------------------------------------------------------------------------------|
|          | 1.743384 0.253435; 6 8.261589 1.066814 -0.166692; 6 7.250136 2.058382 -0.539713; 6 7.778458 3.349609 -0.340672; 6 6.362657 2.638043 7.708168; 6 6.307258 1.197600 7.633288; 6 4.939071 0.798563 7.398961; 6 4.150290 1.984310 7.273803; 6 5.026800 3.123578 7.438230; 6 7.145686 4.662928 -0.696941; 6 10.770573 1.146555 0.569676; 6 10.106638 4.281883 0.468336; 6 5.894325 1.715907 -1.085968; 6 8.086457 -0.417591 -0.312437; 6 2.661152 2.042946 7.086450; 6 4.587005 4.556037 7.540247; 6 4.432308 -0.614125 7.345683; 6 7.534123 3.466579 8.152905; 6 7.448078 0.264548 7.928305; 1 7.462824 4.998984 -1.695531; 1 7.421717 5.446215 0.015205; 1 6.053464 4.596001 -0.703245; 1 11.279364 1.702430 1.363048; 1 11.426976 1.156408 -0.313341; 1 10.680526 0.107786 0.901907; 1 9.618758 5.207529 0.787635; 1 10.648903 4.493739 -0.465087; 1 10.845533 4.014532 1.229840; 1 5.440518 0.879314 -0.543482; 1 5.954622 1.420280 -2.143468; 1 5.207345 2.564471 -1.019282; 1 8.812402 -0.968667 0.292488; 1 8.215969 -0.734582 -1.357679; 1 7.086496 -0.737566 -0.000312; 1 2.138525 2.041425 8.054137; 1 2.291625 1.185601 6.514831; 1 2.358064 2.949889 6.554647; 1 5.380774 5.242153 7.230786; 1 4.315487 4.808932 8.575195; 1 3.714003 4.758352 6.912502; 1 3.549429 -0.702117 6.704316; 1 4.148858 -0.975710 8.344659; 1 5.191540 -1.300283 6.957038; 1 8.484559 2.997667 7.881309; 1 7.533839 3.604638 9.244885; 1 7.519250 4.460599 7.695705; 1 7.350911 -0.678442 7.381281; 1 7.488740 0.020754 8.999588; 1 8.408892 0.708291 7.652719; 6 5.292561 -0.190364 3.318695; 6 5.908181 1.137043 3.673542; 6 5.186784 2.382727 3.600757; 6 7.281620 1.272416 4.169900; 6 5.984799 3.540661 3.928547; 1 4.138510 2.417883 3.314131; 6 8.210018 2.384179 3.760881; 1 7.766329 0.328439 4.419323; 6 7.422703 3.565358 3.440076; 1 7.900437 4.544065 3.496860; 6 5.299446 4.886737 4.000313; 1 5.815326 5.562417 4.692644; 1 5.304420 5.370643 3.011851; 1 4.258100 4.797582 4.328382; 6 9.564155 2.422990 4.424494; 1 10.167959 3.243122 4.019683; 1 9.467232 2.578816 5.509813; 1 10.117820 1.488270 4.266767; 1 4.206814 -0.176234 3.465719; 1 5.711154 -0.996900 3.930838; 1 5.488585 -0.438587 2.266423;                                                                                                                                                                                 |
| 9-10_ts  | 77 5.865700 2.315267 5.420233; 77 7.636788 2.329497 2.005281; 6 9.020937 2.881927 0.304188; 6 9.300468 1.494501 0.566884; 6 8.101448 0.749745 0.321686; 6 7.093544 1.669404 -0.171593; 6 7.653507 2.981566 -0.181037; 6 6.332789 2.489437 7.629638; 6 6.307989 1.088273 7.292529; 6 4.956205 0.717396 6.942636; 6 4.152620 1.896971 6.997645; 6 4.998558 2.999082 7.394484; 6 7.007704 4.218898 -0.736204; 6 10.629995 9.245888 0.972141; 6 10.021455 4.003633 0.308773; 6 5.750699 1.292320 -0.729774; 6 7.963059 -0.745357 0.386309; 6 2.670490 1.968609 6.760743; 6 4.530126 4.385468 7.734491; 6 4.476969 -0.670073 6.627087; 6 7.472229 3.241589 8.256043; 6 7.459942 0.135150 7.443973; 1 7.234280 4.336886 -1.806434; 1 7.359767 5.120027 -0.225491; 1 5.919214 4.185313 -0.630606; 1 11.209214 1.635913 1.568996; 1 11.237028 0.667438 0.091894; 1 10.514830 0.012285 1.565968; 1 9.549756 4.961393 0.550397; 1 10.500971 4.113104 -0.674768; 1 10.816320 3.833072 1.041724; 1 5.391656 0.342055 -0.324465; 1 5.802661 1.175099 -1.822045; 1 4.992553 2.053168 -0.518146; 1 8.636320 -1.178940 1.132497; 1 8.201291 -1.211672 -0.580921; 1 6.944713 -1.046902 0.649587; 1 2.108984 1.776936 7.686617; 1 2.342667 1.229528 6.022480; 1 2.367916 2.954979 6.396161; 1 5.311813 5.129061 7.552778; 1 4.247127 4.454623 8.794663; 1 3.656697 4.675657 7.142667; 1 3.628455 -0.657642 5.934880; 1 4.148858 -1.197838 7.534676; 1 5.265586 -1.300283 6.168735; 1 8.440821 2.841179 7.940726; 1 7.435389 3.184771 9.354730; 1 7.452081 4.300931 7.981932; 1 7.399139 -0.690221 6.726947; 1 7.479422 -0.306120 8.450274; 1 8.418947 0.638615 7.287335; 6 5.941982 1.784955 3.164810; 6 5.151575 2.930855 3.561466; 6 7.521933 1.836910 4.247931; 6 6.013414 4.000647 4.011654; 6 8.327189 2.975360 3.854845; 6 7.407120 3.989064 3.376984; 1 7.802930 4.956615 3.065745; 6 5.281761 0.454300 2.883933; 1 5.030362 0.373872 1.819882; 1 5.951236 -0.378296 3.123795; 1 4.359821 0.328341 3.464952; 1 4.072223 2.981783 3.431462; 1 8.005753 0.879397 4.437083; 6 5.451997 5.359161 4.360241; 1 6.072857 5.875335 5.102654; 1 5.410424 6.004571 3.468584; 1 4.436930 5.284675 4.765064; 6 9.786013 3.133478 4.183286; 1 10.261403 3.874791 3.530789; 1 9.911793 3.476286 5.220644; 1 10.325943 2.185209 4.076291;                                                                               |
| 10       | 77 -0.769648 0.123399 1.487048; 77 7.703854 0.208960 -1.559673; 6 2.493735 0.375797 -3.153556; 6 2.454154 -0.957074 -2.616411; 6 1.187567 -1.540388 -2.947051; 6 0.425751 -0.544040 -3.694609; 6 1.243752 0.626639 -3.815295; 6 -0.125520 0.114935 3.653619; 6 -0.152978 -1.257422 3.155057; 6 -1.522319 -1.602005 2.906657; 6 -2.338155 -0.458045 3.215882; 6 -1.478170 0.586916 3.701185; 6 0.891215 1.865658 -4.588492; 6 3.590787 -1.662602 -1.932166; 6 3.695556 1.275963 -3.179925; 6 -0.855758 -0.780600 -4.443988; 6 0.851926 -2.999672 -2.817108; 6 -3.839761 -0.408864 3.162934; 6 -1.926356 1.915391 4.239096; 6 -2.025377 -2.954410 2.491642; 6 1.082035 0.814355 4.210677; 6 1.018313 -2.197828 3.129101; 1 1.228916 1.789875 -5.632309; 1 1.357844 2.758021 -4.159326; 1 -0.189632 2.032801 -4.603452; 1 4.211780 -0.968102 -1.357805; 1 4.245499 -2.159286 -2.663065; 1 3.226978 -2.428648 -1.241390; 1 3.415544 2.333308 -3.219353; 1 4.314219 1.072767 -4.066008; 1 4.333399 1.135053 -2.302385; 1 -1.449480 -1.580269 -3.994471; 1 -0.651535 -1.074207 -5.484123; 1 -1.481035 0.117324 -4.471413; 1 1.234207 -3.422326 -1.882463; 1 1.295925 -3.572931 -3.644288; 1 -0.225406 -3.176067 -2.841956; 1 -4.288082 -0.751461 4.106879; 1 -4.236887 -1.046302 2.366355; 1 -4.204162 0.607643 2.982742; 1 -1.160409 2.684486 4.101257; 1 -2.140545 1.852599 5.315619; 1 -2.838191 2.266738 3.746390; 1 -2.958200 -2.884510 1.923786; 1 -2.223607 -3.585907 3.369637; 1 -1.298462 -3.480316 1.865638; 1 1.987116 0.558573 3.651223; 1 1.254693 0.537076 5.260791; 1 0.969487 1.902229 4.170348; 1 0.870454 -3.002805 2.402668; 1 1.177549 -2.662601 4.113087; 1 1.944838 -1.680362 2.860840; 6 -1.092707 -0.402139 -0.662790; 6 -1.941638 0.658423 -0.222595; 6 1.072157 0.410755 0.616330; 6 -1.209597 1.832221 0.156748; 6 1.289194 1.648581 -0.060990; 6 0.048817 2.076576 -0.655663; 1 0.045876 2.963508 -1.293453; 6 -1.719961 -1.748030 -0.932984; 1 -2.001214 -1.855068 -1.989581; 1 -1.037267 -2.568054 -0.691017; 1 -2.634410 -1.888344 -0.339051; 1 -3.013406 0.539959 -0.052397; 1 1.945590 -0.108426 1.017398; 6 -1.906217 3.063214 0.693559; 1 -1.249725 3.634297 1.360831; 1 -2.200159 3.737099 -0.126512; 1 -2.812525 2.805371 1.252360; 6 2.598361 2.388859 -0.140916; 1 2.681617 2.991778 -1.051073; 1 2.673890 3.074403 0.715076; 1 3.455055 1.708243 -0.092382; |
| 10-11_ts | 77 -0.616586 0.014145 1.550770; 77 0.568424 0.414785 -1.441977; 6 2.421592 0.304234 -2.971431; 6 2.394504 -0.889224 -2.190333; 6 1.133678 -1.558350 -2.401671; 6 0.357394 -0.749064 -3.327007; 6 1.143591 0.422909 -3.632138; 6 0.116428 -0.370942 3.741364; 6 0.079828 -1.546722 2.891486; 6 -1.323171 -1.874242 2.607917; 6 -2.105893 -0.805274 3.103415; 6 -1.204535 0.148442 3.763968; 6 0.772267 1.480937 -4.631731; 6 3.518689 -1.415529 -1.344276; 6 3.584068 1.239131 -3.135757; 6 -0.874659 -1.177592 -4.071601; 6 0.827770 -2.964024 -1.968880; 6 -3.601976 -0.688325 3.075499; 6 -1.663817 1.393273 4.465042; 6 -1.805446 -3.151838 1.988693; 6 1.345333 0.229214 4.356122; 6 1.240345 -2.464051 2.636214; 1 1.133714 1.214713 -5.635577; 1 1.206072 2.451814 -4.373061; 1 -0.312067 1.608265 -4.690445; 1 4.140860 -0.606515 -0.949451; 1 4.172691 -2.079118 -1.927932; 1 3.141288 -1.989569 -0.493220; 1 3.256035 2.266225 -3.324708; 1 4.213329 0.940402 -3.986615; 1 4.224932 1.255697 -2.248911; 1 -1.445718 -1.924842 -3.516651; 1 -0.601498 -1.623354 -5.039441; 1 -1.542238 -0.334000 -4.271690; 1 1.159575 -3.152855 -0.942705; 1 1.334017 -3.693284 -2.618735; 1 -0.242766 -3.177018 -2.014197; 1 -4.043253 -1.026811 4.024012; 1 -4.037341 -1.292534 2.274173; 1 -3.920489 0.347158 2.918564; 1 -0.850873 2.116282                                                                                                                                                                                                                                                                                                                                                                                                                                                                                                                                                                                                                                                                                                                                                                                                                                                                                                                                                                                                                                                      |

|          |                                                                                                                                                                                                                                                                                                                                                                                                                                                                                                                                                                                                                                                                                                                                                                                                                                                                                                                                                                                                                                                                                                                                                                                                                                                                                                                                                                                                                                                                                                                                                                                                                                                                                                                                                                                                                                                                                                                                                                                                                                                                                                                                                                                                                                                                                                                                                                                                   |
|----------|---------------------------------------------------------------------------------------------------------------------------------------------------------------------------------------------------------------------------------------------------------------------------------------------------------------------------------------------------------------------------------------------------------------------------------------------------------------------------------------------------------------------------------------------------------------------------------------------------------------------------------------------------------------------------------------------------------------------------------------------------------------------------------------------------------------------------------------------------------------------------------------------------------------------------------------------------------------------------------------------------------------------------------------------------------------------------------------------------------------------------------------------------------------------------------------------------------------------------------------------------------------------------------------------------------------------------------------------------------------------------------------------------------------------------------------------------------------------------------------------------------------------------------------------------------------------------------------------------------------------------------------------------------------------------------------------------------------------------------------------------------------------------------------------------------------------------------------------------------------------------------------------------------------------------------------------------------------------------------------------------------------------------------------------------------------------------------------------------------------------------------------------------------------------------------------------------------------------------------------------------------------------------------------------------------------------------------------------------------------------------------------------------|
|          | 4.573883; 1 -2.042081 1.158464 5.470364; 1 -2.471528 1.884339 3.914454; 1 -2.798012 -3.037523 1.544720; 1 -1.867086 -3.949700 2.742896; 1 -1.129882 -3.496556 1.199986; 1 2.202960 0.177737 3.675475; 1 1.630954 -0.293076 5.280090; 1 1.193099 1.283117 4.607656; 1 1.108989 -3.023075 1.705054; 1 1.347315 -3.193239 3.452453; 1 2.179502 -1.907806 2.563155; 6 -1.264561 0.060610 -0.417690; 6 -2.007013 1.312074 -0.174348; 6 0.957017 1.026205 0.757748; 6 -1.464391 2.512810 -0.522274; 6 1.054416 2.107225 -0.142527; 6 -0.076715 2.485394 -0.989020; 1 0.177631 3.266426 -1.710503; 6 -2.170932 -1.075390 -0.863807; 1 -2.563161 -0.904145 -1.876379; 1 -1.664331 -2.044952 -0.855069; 1 -3.044395 -1.157882 -0.197667; 1 -3.032049 1.255092 0.199899; 1 1.924171 0.774657 1.205583; 6 -2.178388 3.832941 -0.415736; 1 -1.734645 4.478660 0.357879; 1 -2.116535 4.394721 -1.359023; 1 -3.238767 3.701420 -0.173085; 6 2.356108 2.873560 -0.285612; 1 2.467075 3.307873 -1.284623; 1 2.371170 3.704412 0.433623; 1 3.229318 2.244409 -0.083143;                                                                                                                                                                                                                                                                                                                                                                                                                                                                                                                                                                                                                                                                                                                                                                                                                                                                                                                                                                                                                                                                                                                                                                                                                                                                                                                                            |
| 11       | 77 -0.556524 0.010193 1.312223; 77 0.350567 0.385067 -1.316051; 6 2.603872 0.367136 -2.236138; 6 2.396204 -0.892178 -1.610482; 6 1.242134 -1.519734 -2.212895; 6 0.738424 -0.634673 -3.243737; 6 1.567605 0.554414 -3.221429; 6 0.616901 -0.884498 3.128810; 6 -0.056549 -2.036136 2.548981; 6 -1.454085 -1.818993 2.622994; 6 -1.677945 -0.504551 3.183680; 6 -0.382078 0.037808 3.564043; 6 1.500940 1.676419 -4.219164; 6 3.296070 -1.514504 -0.583163; 6 3.737966 1.310283 -1.955431; 6 -0.279207 -0.977114 -4.293804; 6 0.865843 -2.963591 -2.036680; 6 3.012804 0.055919 3.585643; 6 -0.157262 1.296582 4.350982; 6 -2.531607 -2.808751 2.288369; 6 -2.094976 -0.781343 3.377400; 6 0.619927 -3.301742 2.108517; 1 2.129322 1.456208 -5.093856; 1 1.853239 2.622129 -3.795670; 1 0.480066 1.833810 -4.578645; 1 3.699267 -0.768512 0.108708; 1 4.150462 -2.014441 -1.062623; 1 2.767395 -2.266269 0.007213; 1 3.475951 2.344725 -2.194142; 1 4.622507 1.052479 -2.555387; 1 4.038139 1.279360 -0.902907; 1 -1.037871 -1.663995 -3.908828; 1 0.196277 -1.459443 -5.160658; 1 -0.799599 -0.084549 -4.653074 -1.918239 -3.276054 -0.989764; 1 1.549700 -3.608048 -2.608012; 1 -0.146438 -3.164562 -2.393625; 1 -3.314911 -0.316193 4.576242; 1 -3.795096 -0.222784 2.873599; 1 -2.988709 1.148032 3.633452; 1 0.815389 1.746521 4.125421; 1 -0.183598 1.099228 5.431634; 1 -0.923586 2.046835 4.132409; 1 -3.442685 -2.314918 1.937963; 1 -2.801957 -3.397292 3.177033; 1 -2.218170 -3.513420 1.513057; 1 2.673767 -1.210301 2.553818; 1 2.381756 -1.316309 4.294794; 1 2.410314 0.259690 3.494126; 1 0.038608 -3.830401 1.346706; 1 0.752982 -3.993280 2.953726; 1 1.613827 -3.106031 1.695884; 6 -1.514521 -0.190771 -0.536860; 6 -2.562883 0.826006 -0.776488; 6 -0.002311 1.796700 0.921351; 6 -2.216190 2.013030 -1.295283; 6 0.165688 2.382500 -0.373122; 6 -0.758940 2.183680 -1.500422; 1 -0.490362 2.800434 -2.362545; 6 -2.034719 -1.589468 -0.848313; 1 -2.237770 -1.700161 -1.924653; 1 -1.341163 -2.378305 -0.549275; 1 -2.990311 -1.768711 -0.334409; 1 -3.595886 0.589777 -0.509442; 1 0.518065 2.345062 1.721975; 6 -3.142821 3.169581 -1.556447; 1 -2.930162 4.017801 -0.888280; 1 -3.040019 3.548268 -2.583768; 1 -4.189891 2.883666 -1.408365; 6 1.227178 3.463697 -0.514070; 1 1.457120 3.669394 -1.564891; 1 0.858308 4.400787 -0.072388; 1 2.159650 3.201638 -0.003314;  |
| 11-2_ts  | 77 -0.461769 -0.154784 1.633009; 77 0.681178 -0.121875 -0.974836; 6 2.724822 -0.583784 -2.165468; 6 2.478522 -1.659868 -1.284429; 6 1.160182 -2.202992 -1.588666; 6 0.631857 -1.483707 -2.732364; 6 1.561144 -0.425537 -3.026709; 6 0.148906 -0.428714 3.861981; 6 0.106624 -1.729763 3.277790; 6 -1.250813 -2.005202 2.837891; 6 -2.035995 -0.846731 3.115563; 6 -1.163205 0.158452 3.702483; 6 1.468897 0.512437 -4.196862; 6 3.411828 -2.202042 -0.241734; 6 3.990074 0.216357 -2.271155; 6 -0.536920 -1.879789 -3.586856; 6 0.643609 -3.503923 -1.045281; 6 -3.522741 -0.711487 2.956668; 6 -1.613059 1.470356 4.279437; 6 -1.756054 -3.330769 2.345293; 6 1.333296 0.224677 4.512097; 6 1.234722 -2.719663 3.257745; 1 1.928444 0.066741 -5.091544; 1 1.982995 1.457523 -3.999440; 1 0.428227 0.746147 -4.437343; 1 4.143505 -1.452510 0.074260; 1 3.971192 -3.067736 -0.624955; 1 2.867185 -2.528999 0.647963; 1 3.795307 1.250737 -2.567151; 1 4.657891 -0.216931 -3.029248; 1 4.540461 0.239368 -1.325873; 1 -1.258102 -2.485377 -3.033934; 1 -0.196903 -2.473230 -4.448057; 1 -1.067885 -1.005065 -3.974254; 1 0.811767 -3.580184 0.032456; 1 1.154319 -4.351083 -1.525718; 1 -0.427402 -3.621976 -1.223859; 1 -4.042310 -0.992420 3.884251; 1 -3.905316 -1.354656 2.158721; 1 -3.807533 0.317528 2.717784; 1 -0.802374 2.204450 4.284049; 1 -1.957551 1.344617 5.316882; 1 -2.438088 1.897628 3.702881; 1 -2.662397 -3.216305 1.744141; 1 -2.000203 -4.000452 3.183317; 1 -1.014955 -3.844369 1.724684; 1 2.276847 -0.148617 4.099810; 1 1.353474 0.038835 5.595405; 1 1.319629 1.309717 4.366512; 1 1.160085 -3.398416 2.402919; 1 1.226240 -3.339372 4.166146; 1 2.208323 -2.223011 3.209180; 6 -1.287317 -0.061322 -0.274274; 6 -1.949142 1.241519 -0.294580; 6 0.930562 1.079229 0.937561; 6 -1.394621 2.381633 -0.798278; 6 1.055241 1.969579 -0.178143; 6 0.014194 2.410084 -1.045414; 1 0.351123 3.107199 -1.817903; 6 -2.249689 -1.180524 -0.652518; 1 -2.539146 -1.115020 -1.711717; 1 -1.830242 -2.173431 -0.472202; 1 -3.180393 -1.103735 -0.070277; 1 -2.998070 1.255595 0.015209; 1 1.866696 1.044411 1.507387; 6 -2.191655 3.640676 -1.060480; 1 -1.962081 4.446210 -0.347360; 1 -1.978305 4.040068 -2.062514; 1 -3.268740 3.448597 -1.005359; 6 2.403972 2.653102 -0.368685; 1 2.566813 2.955258 -1.409126; 1 2.439250 3.565304 0.243194; 1 3.237650 2.015737 -0.061159; |
| 14-16_ts | 77 0.427258 2.541808 1.415703; 6 -0.302117 3.427786 -0.473526; 6 -1.546539 4.083795 -0.589563; 6 2.416126 1.647806 2.218136; 6 1.714368 2.416777 3.229485; 6 1.786254 3.826262 2.857325; 6 2.418085 3.902276 1.595237; 6 2.785922 2.553698 1.181967; 6 3.653561 2.213303 0.000938; 6 2.734137 5.150611 0.824838; 6 1.312388 4.967645 3.710447; 6 1.360616 1.936009 4.610695; 6 2.821165 0.204531 2.304330; 1 -2.312076 3.942815 0.162933; 6 -1.816136 4.952104 -1.647421; 6 -0.867412 5.179237 -2.647154; 1 -1.083651 5.815446 -3.470682; 6 0.351989 4.503369 -2.583958; 6 0.619239 3.633970 -1.526717; 1 1.551318 3.079062 -1.521334; 1 0.393224 4.712899 4.247161; 1 1.105854 5.860594 3.113603; 1 2.065915 5.238500 4.464460; 1 0.480678 2.450735 5.009108; 1 2.191338 2.125696 5.305284; 1 1.154021 0.863614 4.630612; 1 2.122968 -0.382506 2.907243; 1 3.814192 0.104284 2.767679; 1 2.871345 -0.258059 1.313872; 1 3.606085 2.983437 -0.773961; 1 3.368991 1.259284 -0.454693; 1 4.707579 2.129692 0.303777; 1 2.216930 6.019301 1.241227; 1 2.436941 5.066340 -0.225694; 1 3.812108 5.362253 0.848550; 1 -0.187012 2.153317 -0.118566; 6 -1.891622 -1.122559 2.549973; 6 -1.054662 0.104508 2.912935; 1 0.000969 -0.194281 2.949493; 6 -1.298358 1.237374 1.913952; 6 -2.123844 0.749394 0.766888; 1 -2.441092 1.519677 0.065916; 6 -1.946360 -0.570192 1.087071; 6 -1.819836 -1.595214 1.181846; 1 -1.774986 -2.647520 0.909782; 6 -1.956273 -2.163576 3.649072; 1 -2.447883 -1.766908 4.545242; 1 -0.945370 -2.481448 3.950528; 1 -2.506910 -3.055648 3.330536; 6 -1.466553 2.602140 2.354029; 6 -1.922607 -0.845096 -1.291698; 1 -2.255535 -1.864441 -1.519604; 1 -0.903482 -0.727487 -1.686011; 1 -2.565252 -0.142832 -1.833940; 1 -1.369351 2.807412 3.421305; 1 -2.234088 3.216719 1.887815; 1 -4.947770 -1.143789 4.777304; 6 -5.512334 -1.750653 4.063190; 6 -5.512060 -1.131604 2.694868; 1 -5.068443 -2.750529 4.057439; 1 -6.537431 -1.846202 4.448325; 6 -5.510590 0.286599 2.418834; 6 -5.686750 -1.840249 1.451551; 6 -5.644893 0.437671 0.983984; 6 -5.548365 1.392356 3.435069; 6 -5.776156 -0.871830 0.397787; 6 -5.842194 -3.326575 1.299054; 77 -3.692871 -0.582661 1.449386; 6 -5.796816 1.744652 0.257749; 1 -5.019488 1.111438 4.350855; 1 -6.582553 1.644776 3.713428; 1 -5.076161 2.302813 3.054244; 6 -6.026418 -1.167348 -                                       |

|          |                                                                                                                                                                                                                                                                                                                                                                                                                                                                                                                                                                                                                                                                                                                                                                                                                                                                                                                                                                                                                                                                                                                                                                                                                                                                                                                                                                                                                                                                                                                                                                                                                                                                                                                                                                                                                                                                                                                                                                                                                                                                                                                                                                                                                                                                                                                                                                                                                                                                                                                                                                                                                                                                                                                                                                         |
|----------|-------------------------------------------------------------------------------------------------------------------------------------------------------------------------------------------------------------------------------------------------------------------------------------------------------------------------------------------------------------------------------------------------------------------------------------------------------------------------------------------------------------------------------------------------------------------------------------------------------------------------------------------------------------------------------------------------------------------------------------------------------------------------------------------------------------------------------------------------------------------------------------------------------------------------------------------------------------------------------------------------------------------------------------------------------------------------------------------------------------------------------------------------------------------------------------------------------------------------------------------------------------------------------------------------------------------------------------------------------------------------------------------------------------------------------------------------------------------------------------------------------------------------------------------------------------------------------------------------------------------------------------------------------------------------------------------------------------------------------------------------------------------------------------------------------------------------------------------------------------------------------------------------------------------------------------------------------------------------------------------------------------------------------------------------------------------------------------------------------------------------------------------------------------------------------------------------------------------------------------------------------------------------------------------------------------------------------------------------------------------------------------------------------------------------------------------------------------------------------------------------------------------------------------------------------------------------------------------------------------------------------------------------------------------------------------------------------------------------------------------------------------------------|
|          | 1.053402; 1 -5.461163 -3.675698 0.334077; 1 -6.899229 -3.624093 1.360666; 1 -5.305526 -3.870385 2.082289; 1 -5.240809 2.544052 0.756179; 1 -6.851667 2.050966 0.215189; 1 -5.431362 1.680866 -0.771923; 1 -5.594900 -0.398390 -1.701597; 1 -7.103439 -1.210860 -1.270824; 1 -5.594724 -2.128721 -1.349957; 1 -1.322432 0.437286 3.924492; 1 1.094488 4.639495 -3.367025; 1 -2.776737 5.461037 -1.685532;                                                                                                                                                                                                                                                                                                                                                                                                                                                                                                                                                                                                                                                                                                                                                                                                                                                                                                                                                                                                                                                                                                                                                                                                                                                                                                                                                                                                                                                                                                                                                                                                                                                                                                                                                                                                                                                                                                                                                                                                                                                                                                                                                                                                                                                                                                                                                                |
| 16(19)   | 77 0.603933 2.371599 1.373040; 6 -0.166100 3.303029 -0.302622; 6 -0.762511 4.578697 -0.207778; 6 2.680307 1.753027 2.178857; 6 2.009305 2.281065 3.317795; 6 1.734692 3.686389 3.068274; 6 2.247317 4.022587 1.786186; 6 2.783869 2.815362 1.186979; 6 3.582420 2.766479 -0.086192; 6 2.301356 5.386672 1.163045; 6 1.125077 4.627664 0.997270; 6 1.774738 1.579960 4.625792; 6 3.284890 0.382062 2.057698; 1 -0.876024 5.042451 0.769937; 6 -1.210175 5.280941 -1.331401; 6 -1.085279 4.726472 -2.605704; 1 -1.435482 5.266559 -3.481956; 6 -0.500942 3.464923 -2.733336; 6 -0.051293 2.771936 -1.605229; 1 0.400514 1.793195 -1.743571; 1 0.299379 4.159873 4.614157; 1 0.735323 5.530082 3.588172; 1 1.867510 4.943626 4.813788; 1 0.833605 1.889910 5.091346; 1 2.579375 1.804233 5.340891; 1 1.740714 0.493849 4.503642; 1 2.719813 -0.362036 2.626694; 1 4.316228 0.377584 2.437919; 1 3.314522 0.048712 1.016974; 1 3.137972 3.402656 -0.857146; 1 3.628699 1.750364 -0.488578; 1 4.614794 3.107214 0.078038; 1 1.588078 6.073954 1.626610; 1 2.072958 5.349974 0.094496; 1 3.304057 5.821487 1.278760; 1 0.586300 1.127080 0.387189; 6 -1.948364 -1.114000 2.610958; 6 -1.079800 0.100575 2.940389; 1 -0.027224 -0.210598 2.997521; 6 -1.295769 1.187118 1.890344; 6 -2.059360 0.680735 0.719508; 1 -2.296905 1.432346 -0.029517; 6 -1.903259 -0.673707 0.221399; 6 -1.850318 -1.651099 1.268693; 1 -1.836868 -2.716329 1.048516; 6 -2.084070 -2.098773 3.753777; 1 -2.583987 -1.642339 4.616095; 1 -1.095225 -2.440832 4.098630; 1 -2.660490 -2.982761 3.459568; 6 -1.377147 2.562331 2.230696; 6 -1.836232 -1.023900 -1.239670; 1 -2.206619 -2.037816 -1.430640; 1 -0.798131 -0.970715 -1.595645; 1 -2.422073 -0.320439 -1.840456; 1 -1.287816 2.847983 3.278779; 1 -2.016607 3.214680 1.641129; 1 -5.112770 -0.884254 4.723807; 6 -5.654428 -1.518277 4.015716; 6 -5.575235 -0.974848 2.617907; 1 -5.233138 -2.525484 4.085352; 1 -6.698925 -1.572916 4.353708; 6 -5.514043 0.425048 2.265621; 6 -5.722109 -1.745343 1.407727; 6 -5.584962 0.501421 0.819882; 6 -5.552995 1.586758 3.217143; 6 -5.737828 -0.833420 0.300222; 6 -5.920920 -3.232141 1.328618; 77 -3.693826 -0.558495 1.420589; 6 -5.653977 1.770443 0.017771; 1 -5.072388 1.340666 4.168859; 1 -6.588001 1.888444 3.436676; 1 -5.034822 2.458383 2.806525; 6 -5.940150 -1.200554 -1.141861; 1 -5.511176 -3.645158 0.401451; 1 -6.989014 -3.492270 1.359423; 1 -5.436270 -3.748229 2.162805; 1 -5.085763 2.575099 0.492960; 1 -6.693155 2.113069 -0.086228; 1 -5.249194 1.634452 -0.989664; 1 -5.460706 -0.480518 -1.811864; 1 -7.008916 -1.224449 -1.398936; 1 -5.527722 -2.188871 -1.368996; 1 -1.349888 0.485510 3.932875; 1 -0.391705 3.013277 -3.717746; 1 -1.659736 6.264415 -1.206120;  |
| 16-17_ts | 77 0.299649 1.182669 4.877062; 6 0.056907 -0.490418 8.918883; 6 -0.237858 0.128244 7.699456; 6 2.252614 2.246831 4.568215; 6 1.454102 3.044827 5.493335; 6 0.324881 3.538725 4.775190; 6 0.416467 3.083316 3.404106; 6 1.619382 2.326590 3.274439; 6 2.208255 1.806351 1.998598; 6 -0.524826 3.466835 2.296660; 6 -0.740491 4.451883 5.313444; 6 1.842656 3.381186 6.904003; 6 3.652670 1.766597 4.826317; 1 -1.204917 0.616932 7.539791; 6 0.676789 0.149910 6.625191; 6 1.909188 -0.497152 6.853872; 1 2.646702 -0.534888 6.056621; 6 2.215799 -1.112408 8.071465; 6 1.289260 -1.114556 9.115539; 1 1.522856 -1.594074 10.062941; 1 -0.855125 4.343106 6.395293; 1 -1.713940 4.254292 4.853725; 1 -0.490748 5.502962 5.110432; 1 0.975111 3.677208 7.500845; 1 2.561040 4.213010 6.922335; 1 2.304500 2.525404 7.403687; 1 3.792857 1.485615 5.872886; 1 4.383749 2.555008 4.594075; 1 3.901958 0.894679 4.213241; 1 1.441163 1.586661 1.252450; 1 2.783645 0.892109 2.166017; 1 2.889673 2.550865 1.562196; 1 -1.561731 3.517261 2.645719; 1 -0.489632 2.749317 1.471090; 1 -0.275618 4.453796 1.880971; 6 0.030789 -3.143730 3.432528; 6 0.102948 -2.057563 4.508370; 1 1.125212 -2.020261 4.904448; 6 -0.328918 -0.710336 3.931970; 6 -0.311611 -0.759880 2.431806; 1 -0.648312 0.151632 1.937006; 6 0.596114 -1.589119 1.656653; 6 0.770059 -2.902248 2.212985; 1 1.346222 -3.664595 1.693071; 6 0.020783 -4.555210 3.981572; 1 -0.878192 -4.742408 4.580082; 1 0.886035 -4.722877 4.641509; 1 0.056337 -5.303789 3.181925; 6 -1.509916 -0.060773 4.509371; 6 1.230034 -1.186982 0.350051; 1 1.335618 -2.050148 -0.317009; 1 2.230173 -0.762749 0.506565; 1 0.628243 -0.430748 -0.166439; 1 -1.993822 -0.592716 5.330647; 1 -2.221985 0.386079 3.816104; 1 -1.275281 1.062273 5.393116; 1 -3.283463 -4.990797 3.616160; 6 -3.206651 -5.290480 2.566979; 6 -2.992688 -4.104946 1.670242; 1 -2.388390 -6.012351 2.489784; 1 -4.136217 -5.814977 2.304073; 6 -3.533166 -2.782974 1.888833; 6 -2.381540 -4.139500 0.363809; 6 -3.199819 -1.993362 0.722052; 6 -4.430510 -2.366600 3.019274; 6 -2.516692 -2.840188 -0.223856; 6 -1.787399 -5.351125 -0.296045; 77 -1.300559 -2.598264 1.781324; 6 -3.652342 -0.582989 0.467281; 1 -4.177613 -2.890080 3.946286; 1 -5.485120 -2.584375 2.793343; 1 -4.353497 -1.293604 3.219382; 6 -2.075536 -2.444319 -1.603675; 1 -0.985967 -5.081175 -0.991158; 1 -2.546020 -5.903406 -0.869551; 1 -1.367352 -6.044092 0.439136; 1 -3.732532 -0.015100 1.398976; 1 -4.639466 -0.566679 -0.016013; 1 -2.957803 -0.047352 -0.187501; 1 -1.827948 -1.379624 -1.657808; 1 -2.865156 -2.633699 -2.345087; 1 -1.190110 -3.004961 -1.920475; 1 -0.681406 -0.478536 9.718669; 1 3.181690 -1.597902 8.199453; 1 -0.534106 -2.330385 5.358073; |
| 17       | 77 -1.769896 3.192745 3.788348; 6 -3.422155 2.300843 2.429508; 6 -2.047159 2.187704 1.920005; 6 -1.625224 3.521060 1.485521; 6 -2.605819 4.427429 1.931847; 6 -3.729852 3.672863 2.504123; 6 -5.017448 4.293808 2.963944; 6 -2.587289 5.920229 1.781243; 6 -0.360935 3.828965 0.739907; 6 -1.399979 0.902179 1.492881; 6 -4.329434 1.136726 2.692070; 1 0.465945 3.201157 1.082604; 1 -0.054221 4.870148 0.874793; 1 -0.493092 3.656090 -0.337442; 1 -0.310524 0.987779 1.489906; 1 -1.721349 0.626080 0.477700; 1 -1.668416 0.080304 2.163486; 1 -3.806669 0.320444 3.198591; 1 -4.717617 0.740065 1.742947; 1 -5.188300 1.414994 3.308395; 1 -4.840101 5.200759 3.552309; 1 -5.598624 3.605415 3.584315; 1 -5.647552 4.581417 2.110240; 1 -1.576950 6.292759 1.591940; 1 -2.965161 6.419602 2.679533; 1 -3.221616 6.237564 0.941320; 6 2.425896 4.326057 4.058710; 6 1.027082 4.332382 4.060561; 1 0.519390 5.293606 4.091905; 6 0.267174 3.143113 4.013204; 6 1.009243 1.942619 3.959063; 1 0.480558 0.992447 3.926773; 6 2.407603 1.926894 3.950230; 6 3.128614 3.121334 4.003100; 1 4.215869 3.113442 3.999695; 1 -0.149109 1.669792 6.112685; 77 -2.141734 4.410899 8.304414; 6 -3.424219 3.645757 9.988589; 6 -4.171391 4.658646 9.280561; 6 -2.257744 4.293938 10.543521; 6 -3.857323 2.230365 10.243182; 6 -3.512229 5.930319 9.456921; 6 -5.499011 4.450141 8.608306; 6 -2.326761 5.705774 10.227592; 6 -1.269491 3.656406 11.477048; 1 -4.472928 1.844494 9.425137; 1 -4.450191 2.154929 11.167136; 1 -2.997925 1.561292 10.348368; 6 -4.012104 7.258190 8.964786; 1 -5.649849 5.155169 7.784907; 1 -6.324791 4.593324 9.319733; 1 -5.584635 3.439906 8.198561; 6 -1.370509 6.759298 10.707901; 1 -1.116609 2.599580 11.240466; 1 -1.622262 3.715582 12.516593; 1 -0.293224 4.147962 11.432230; 1 -3.188120 7.950097 8.763016; 1 -4.668754 7.737681 9.704964; 1 -4.588720 7.154283 8.040067; 1 -0.361714 6.356921 10.839071; 1 -1.688732 7.169515 11.677377; 1 -1.304385 7.595393 10.004675; 6 -1.479999 5.037333 6.365481; 6 -2.477938 4.008597 6.106806; 6 -0.359334 4.553732 7.120053; 6 -2.131886 2.569381 5.768057; 1 -3.455069 4.363514 5.781403; 6 -0.470090 3.193901 7.600599; 1 0.456748 5.214859 7.399371; 6 -0.986359 2.089443 6.681023; 1 -1.356176 1.277539 7.324978; 6 -3.350664 1.660017 5.925988; 1 -4.223257 2.040223                                                                                                                                                                                                                                                                                                                                                                                                                       |

|          |                                                                                                                                                                                                                                                                                                                                                                                                                                                                                                                                                                                                                                                                                                                                                                                                                                                                                                                                                                                                                                                                                                                                                                                                                                                                                                                                                                                                                                                                                                                                                                                                                                                                                                                                                                                                                                                                                                                                                                                                                                                                                                                                                                                                                                                                                                                                                                                                                                                                                                                                                                                                                                                                                                                                                                                                                                                                                                                                                                                                                                                                                                                                                                                                                                                                                                                                                                                                                                                                                                                                                                                                                                                                           |
|----------|---------------------------------------------------------------------------------------------------------------------------------------------------------------------------------------------------------------------------------------------------------------------------------------------------------------------------------------------------------------------------------------------------------------------------------------------------------------------------------------------------------------------------------------------------------------------------------------------------------------------------------------------------------------------------------------------------------------------------------------------------------------------------------------------------------------------------------------------------------------------------------------------------------------------------------------------------------------------------------------------------------------------------------------------------------------------------------------------------------------------------------------------------------------------------------------------------------------------------------------------------------------------------------------------------------------------------------------------------------------------------------------------------------------------------------------------------------------------------------------------------------------------------------------------------------------------------------------------------------------------------------------------------------------------------------------------------------------------------------------------------------------------------------------------------------------------------------------------------------------------------------------------------------------------------------------------------------------------------------------------------------------------------------------------------------------------------------------------------------------------------------------------------------------------------------------------------------------------------------------------------------------------------------------------------------------------------------------------------------------------------------------------------------------------------------------------------------------------------------------------------------------------------------------------------------------------------------------------------------------------------------------------------------------------------------------------------------------------------------------------------------------------------------------------------------------------------------------------------------------------------------------------------------------------------------------------------------------------------------------------------------------------------------------------------------------------------------------------------------------------------------------------------------------------------------------------------------------------------------------------------------------------------------------------------------------------------------------------------------------------------------------------------------------------------------------------------------------------------------------------------------------------------------------------------------------------------------------------------------------------------------------------------------------------------|
|          | 5.383583; 1 -3.136354 0.650428 5.555136; 1 -3.628344 1.571659 6.987686; 6 0.591948 2.719880 8.572556; 1 0.947776 3.529681 9.218860; 1 0.212372 1.916340 9.214999; 1 1.457875 2.316774 8.026698; 6 -1.595480 6.456944 5.876124; 1 -1.214686 6.553922 4.850995; 1 -2.641815 6.783462 5.872357; 1 -1.027081 7.142198 6.515065; 1 2.934032 0.975053 3.904989; 1 2.966799 5.270156 4.097714;                                                                                                                                                                                                                                                                                                                                                                                                                                                                                                                                                                                                                                                                                                                                                                                                                                                                                                                                                                                                                                                                                                                                                                                                                                                                                                                                                                                                                                                                                                                                                                                                                                                                                                                                                                                                                                                                                                                                                                                                                                                                                                                                                                                                                                                                                                                                                                                                                                                                                                                                                                                                                                                                                                                                                                                                                                                                                                                                                                                                                                                                                                                                                                                                                                                                                   |
| 17-18_ts | 77 -1.100864 2.376965 4.037744; 6 -1.924969 0.321613 3.084040; 6 -0.506183 0.452071 2.824458; 6 -0.293670 1.622325 2.037681; 6 -1.590774 2.258821 1.838229; 6 -2.588107 1.414077 2.447010; 6 -4.070125 1.599568 2.299392; 6 -1.863306 3.379662 0.876434; 6 0.994226 2.061737 1.404295; 6 0.540860 -0.546232 3.232175; 6 -2.573089 -0.839237 3.785430; 1 1.862415 1.688168 1.955131; 1 1.073031 3.151538 1.374714; 1 1.067806 1.689142 0.372525; 1 1.532293 -0.088521 3.286555; 1 0.595500 -1.371950 2.508617; 1 0.322820 -0.984665 4.211033; 1 -1.968644 -1.191382 4.628455; 1 -2.708358 -1.693881 3.107022; 1 -3.561349 -0.577480 4.176029; 1 -4.351286 2.656311 2.330298; 1 -4.631981 1.082394 3.081117; 1 -4.406941 1.198653 1.332825; 1 -1.057214 4.117405 0.882381; 1 -2.791721 3.904699 1.122036; 1 -1.960800 2.996460 -0.150002; 6 0.283020 6.399956 3.098963; 6 -0.511916 5.276977 3.355503; 1 -1.561139 5.307239 3.072758; 6 0.002724 4.113090 3.963666; 6 1.362643 4.161539 4.337242; 1 1.814628 3.295497 4.816142; 6 2.161095 5.285128 4.100898; 6 1.629487 6.412153 3.469473; 1 2.250770 7.282832 3.273993; 1 -0.232640 2.022002 5.423675; 77 -2.044321 4.237911 8.473982; 6 -3.709865 3.594307 9.833607; 6 -3.914177 4.979497 9.478035; 6 -2.472034 3.533571 10.581632; 6 -4.686540 2.468451 9.646308; 6 -2.853671 5.766940 10.065845; 6 -5.124067 5.531888 8.778184; 6 -1.968298 4.875122 10.749139; 6 -1.924366 2.304922 11.250002; 1 -5.304058 2.614676 8.755254; 1 -5.366261 2.384523 10.507944; 1 -4.176383 1.506555 9.536079; 6 -2.739652 7.263477 10.017847; 1 -4.885483 6.439715 8.215705; 1 -5.911689 5.788463 9.500844; 1 -5.542854 4.808155 8.073349; 6 -0.757667 5.268416 11.546558; 1 -2.147076 1.401721 10.674153; 1 -2.363171 2.175722 12.249561; 1 -0.838568 2.359058 11.372625; 1 -1.695261 7.590170 10.048473; 1 -3.254786 7.729871 10.869897; 1 -3.185102 7.671831 9.105618; 1 -0.005672 4.473628 11.555334; 1 -1.022140 5.479378 12.592861; 1 -0.282839 6.168076 11.142485; 6 -1.083391 5.122176 6.746452; 6 -2.305169 4.508209 6.286907; 6 -0.200983 4.195571 7.385335; 6 -2.370959 3.139573 5.655140; 1 -3.084392 5.202267 5.970570; 6 -0.677983 2.831306 7.478109; 1 0.738208 4.517977 7.826508; 6 -1.429678 2.241102 6.310138; 1 -1.761309 1.216911 6.485726; 6 -3.809614 2.663302 5.522465; 1 -4.353900 3.233433 4.760539; 1 -3.861988 1.604372 5.253049; 1 -4.337086 2.796043 6.478703; 6 0.159421 1.843216 8.263200; 1 0.647541 2.324320 9.117032; 1 -0.449888 1.016771 8.647601; 1 0.946216 1.402346 7.630758; 6 -0.773892 6.590322 6.639155; 1 -0.229916 6.795803 5.711154; 1 -1.695931 7.182452 6.627468; 1 -0.159199 6.928379 7.481238; 1 3.206562 5.274602 4.404289; 1 -0.156159 7.270164 2.613840;                                                                                                                                                                                                                                                                                                                                                                                                                                                                                                                                                                                                                                                                                                                                                                                                                                                                                                                          |
| 18       | 77 -0.860898 2.262912 4.329853; 6 -1.670312 0.116990 3.650812; 6 -0.236445 0.156154 3.642013; 6 0.166420 1.133781 2.655677; 6 -1.038627 1.636572 2.022713; 6 -2.162964 1.015550 2.631605; 6 -3.593343 1.151595 2.193317; 6 -1.068967 2.566898 0.846157; 6 1.567169 1.387358 2.173449; 6 0.682681 -0.753885 4.408666; 6 -2.519307 -0.825644 4.455009; 1 2.303579 1.144425 2.945223; 1 1.711739 2.437161 1.901803; 1 1.798901 0.762993 1.289476; 1 1.648507 -0.277651 4.598304; 1 0.873383 -1.681211 3.849709; 1 0.259798 -1.034306 5.377944; 1 -2.003786 -1.162221 5.359053; 1 -2.773178 -1.720294 3.869401; 1 -3.463836 -0.364536 4.763851; 1 -3.818501 2.163822 1.843523; 1 -4.292184 0.918237 3.001980; 1 -3.817845 0.462755 1.366015; 1 -0.261605 3.301647 0.893734; 1 -2.011173 3.118376 0.789212; 1 -0.956359 2.002218 -0.090313; 6 0.525145 6.708167 2.176337; 6 -0.816003 6.323307 2.674776; 1 -1.560365 6.988753 2.241236; 6 -1.213473 5.084321 3.186591; 6 -2.297752 4.179910 3.759473; 6 1.049341 4.595599 3.788768; 6 1.456890 5.832450 3.275981; 1 2.508587 6.109894 3.318070; 1 0.375499 2.492414 5.276203; 77 -2.007023 4.066426 8.611678; 6 -3.953512 3.944837 9.706270; 6 -3.607925 5.341804 9.541503; 6 -2.935743 3.362497 10.549841; 6 -5.224562 3.281635 9.257507; 6 -2.442728 5.625371 10.345144; 6 -4.438262 6.363319 8.816396; 6 -2.023173 4.405071 10.959249; 6 -2.944216 1.955107 11.074422; 1 -5.598689 3.717870 8.326438; 1 -6.017927 3.387539 10.013211; 1 -5.079780 2.211289 9.081406; 6 -1.807007 6.973546 10.526791; 1 -3.823469 7.181726 8.429220; 1 -5.192141 6.803727 9.484341; 1 -4.966248 5.918228 7.968200; 6 -0.876430 4.242753 11.915867; 1 -3.395149 1.263445 10.356604; 1 -3.522500 1.888711 12.006958; 1 -1.933295 1.595878 11.288296; 1 -0.733949 6.889678 10.726419; 1 -2.256162 7.516456 11.370915; 1 -1.928154 7.599209 9.637091; 1 -0.454960 3.233910 11.871472; 1 -1.195251 4.417457 12.953750; 1 -0.067548 4.948144 11.700271; 6 -0.645443 4.703426 7.059757; 6 -1.951324 4.526494 6.462440; 6 -0.157139 3.508687 7.677268; 6 -2.325994 3.283326 5.701138; 1 -2.439965 5.442551 6.132610; 6 -1.025986 2.356374 7.587690; 1 0.779799 3.496497 8.229057; 6 -1.782827 2.118954 6.309513; 1 -1.063676 7.372361 2.779021; 6 -0.884601 5.415573 3.648373; 6 -0.070558 4.282314 3.865150; 6 1.263417 4.350338 3.406337; 6 1.746491 5.466238 2.720420; 1 2.779618 5.482009 2.380916; 1 -0.003846 3.534001 4.971430; 77 -2.025138 4.090990 8.625636; 6 -3.827020 3.630851 9.870120; 6 -3.777617 5.060322 9.654872; 6 -2.654406 3.285450 10.642793; 6 -4.965530 2.712722 9.527615; 6 -2.633145 5.592238 10.357479; 6 -4.842890 5.877355 8.979069; 6 -1.939974 4.499112 10.962689; 6 -2.352070 1.921900 11.195333; 1 -5.501866 3.052671 8.636775; 1 -5.694460 2.656187 10.350473; 1 -4.614705 1.695559 9.327975; 6 -2.266849 7.044520 10.466539; 1 -4.429248 6.783423 8.525300; 1 -5.613696 6.190633 9.697618; 1 -5.338876 5.309229 8.186933; 6 -0.718929 4.597511 11.831930; 1 -2.702754 1.132145 10.524394; 1 -2.845472 1.774529 12.166610; 1 -1.278573 1.773454 11.345756; 1 -1.186649 7.181956 10.580838; 1 -2.750247 7.514480 11.335249; 1 -2.577968 7.605877 9.579903; 1 -0.114302 3.687008 11.781206; 1 -0.991702 4.749352 12.886452; 1 -0.079217 5.435543 11.537058; 6 -0.868614 4.902228 7.005616; 6 -2.172311 4.557580 6.475963; 6 -0.188020 3.772485 7.571882; 6 -2.455699 3.280001 5.718673; 1 -2.803358 5.408189 6.215255; 6 -0.905773 2.520233 7.517710; 1 0.775556 3.879937 8.064505; 6 -1.719954 2.182170 6.296222; 1 -2.223575 1.217544 6.383259; 6 -3.917055 3.148894 5.335476; 1 -4.202165 3.875531 4.563385; 1 - |
| 18-9_ts  | 77 -1.041032 2.384970 4.284657; 6 -1.965827 0.474166 3.558462; 6 -0.540305 0.210319 3.688695; 6 0.126431 1.015012 2.727563; 6 -0.882536 1.712568 1.936959; 6 -2.162589 1.345579 2.410583; 6 -3.489927 1.731307 1.824935; 6 -0.576882 2.603146 0.768112; 6 1.595166 0.974793 2.409881; 6 0.084465 -0.822050 4.582779; 6 -3.041637 -0.360749 4.197770; 1 2.201327 0.816119 3.307751; 1 1.933180 1.900636 1.937053; 1 1.821149 0.154222 1.713034; 1 1.123583 -0.573074 4.818343; 1 0.082128 -1.812057 4.102285; 1 -0.454663 -0.917894 5.529891; 1 -2.805065 -0.613381 5.236087; 1 -3.164220 -1.308137 3.653678; 1 -4.012148 0.143326 4.191697; 1 -3.419784 2.652553 1.239046; 1 -4.244419 1.892993 2.600490; 1 -3.871858 0.945122 1.157203; 1 0.231731 3.304450 0.998531; 1 -1.449018 3.192751 0.472233; 1 -0.263526 2.012655 -0.104216; 6 0.912681 6.560121 2.483308; 6 -0.402711 6.526709 2.955615; 1 -1.063676 7.372361 2.779021; 6 -0.884601 5.415573 3.648373; 6 -0.070558 4.282314 3.865150; 6 1.263417 4.350338 3.406337; 6 1.746491 5.466238 2.720420; 1 2.779618 5.482009 2.380916; 1 -0.003846 3.534001 4.971430; 77 -2.025138 4.090990 8.625636; 6 -3.827020 3.630851 9.870120; 6 -3.777617 5.060322 9.654872; 6 -2.654406 3.285450 10.642793; 6 -4.965530 2.712722 9.527615; 6 -2.633145 5.592238 10.357479; 6 -4.842890 5.877355 8.979069; 6 -1.939974 4.499112 10.962689; 6 -2.352070 1.921900 11.195333; 1 -5.501866 3.052671 8.636775; 1 -5.694460 2.656187 10.350473; 1 -4.614705 1.695559 9.327975; 6 -2.266849 7.044520 10.466539; 1 -4.429248 6.783423 8.525300; 1 -5.613696 6.190633 9.697618; 1 -5.338876 5.309229 8.186933; 6 -0.718929 4.597511 11.831930; 1 -2.702754 1.132145 10.524394; 1 -2.845472 1.774529 12.166610; 1 -1.278573 1.773454 11.345756; 1 -1.186649 7.181956 10.580838; 1 -2.750247 7.514480 11.335249; 1 -2.577968 7.605877 9.579903; 1 -0.114302 3.687008 11.781206; 1 -0.991702 4.749352 12.886452; 1 -0.079217 5.435543 11.537058; 6 -0.868614 4.902228 7.005616; 6 -2.172311 4.557580 6.475963; 6 -0.188020 3.772485 7.571882; 6 -2.455699 3.280001 5.718673; 1 -2.803358 5.408189 6.215255; 6 -0.905773 2.520233 7.517710; 1 0.775556 3.879937 8.064505; 6 -1.719954 2.182170 6.296222; 1 -2.223575 1.217544 6.383259; 6 -3.917055 3.148894 5.335476; 1 -4.202165 3.875531 4.563385; 1 -                                                                                                                                                                                                                                                                                                                                                                                                                                                                                                                                                                                                                                                                                                                                                                                                                                                                                                                                                                                                                                                                                                                                                                                                                                                                                                                                    |

|          |                                                                                                                                                                                                                                                                                                                                                                                                                                                                                                                                                                                                                                                                                                                                                                                                                                                                                                                                                                                                                                                                                                                                                                                                                                                                                                                                                                                                                                                                                                                                                                                                                                                                                         |
|----------|-----------------------------------------------------------------------------------------------------------------------------------------------------------------------------------------------------------------------------------------------------------------------------------------------------------------------------------------------------------------------------------------------------------------------------------------------------------------------------------------------------------------------------------------------------------------------------------------------------------------------------------------------------------------------------------------------------------------------------------------------------------------------------------------------------------------------------------------------------------------------------------------------------------------------------------------------------------------------------------------------------------------------------------------------------------------------------------------------------------------------------------------------------------------------------------------------------------------------------------------------------------------------------------------------------------------------------------------------------------------------------------------------------------------------------------------------------------------------------------------------------------------------------------------------------------------------------------------------------------------------------------------------------------------------------------------|
|          | 4.150345 2.151136 4.956835; 1 -4.556200 3.332047 6.213153; 6 -0.303895 1.335439 8.243207; 1 0.249364 1.644573 9.136610; 1 -1.076069 0.623129 8.557656; 1 0.390621 0.794007 7.583611; 6 -0.289084 6.292060 7.005150; 1 0.253877 6.486981 6.072077; 1 -1.081792 7.044179 7.088419; 1 0.404739 6.432964 7.841794; 1 1.931023 3.519730 3.612912; 1 1.284303 7.431506 1.950695; 1 -1.907834 5.412614 4.000698;                                                                                                                                                                                                                                                                                                                                                                                                                                                                                                                                                                                                                                                                                                                                                                                                                                                                                                                                                                                                                                                                                                                                                                                                                                                                               |
| 7-20_ts  | 77 -1.132872 2.838306 4.500047; 6 -2.954245 1.570554 4.518191; 6 -1.825901 0.652633 4.593580; 6 -1.101685 0.742935 3.367948; 6 -1.800057 1.674434 2.501122; 6 -2.950331 2.153438 3.188543; 6 -4.008818 3.057384 2.626360; 6 -1.427364 1.992595 1.081187; 6 0.088607 -0.086250 2.976025; 6 -1.550064 -0.301233 5.721861; 6 -4.089008 1.648933 5.502027; 1 0.648940 -0.421915 3.853225; 1 0.779012 0.471584 2.336505; 1 -0.221873 -0.982068 2.419634; 1 -0.482756 -0.522005 5.812443; 1 -2.075574 -1.253220 5.561558; 1 -1.885038 0.104815 6.679938; 1 -3.745419 1.460971 6.523002; 1 -4.866563 0.907543 5.268785; 1 -4.559380 2.636559 5.492696; 1 -3.598913 3.748627 1.883629; 1 -4.484456 3.654900 3.409501; 1 -4.799781 2.473771 2.134551; 1 -0.349722 1.906850 0.917704; 1 -1.724216 3.007838 0.802831; 1 -1.920390 1.300040 0.384355; 6 0.847313 6.886292 2.770148; 6 -0.286584 6.715602 3.587973; 1 -0.913172 7.570266 3.839160; 6 -0.591203 5.445083 4.055978; 6 0.189246 4.337424 3.698878; 6 1.320524 4.466226 2.888751; 6 1.621636 5.767642 2.442481; 1 2.501850 5.908388 1.816438; 6 1.228525 8.261971 2.270737; 1 1.559938 8.910609 3.092604; 1 0.379570 8.764797 1.790780; 1 2.043624 8.212184 1.541212; 6 -1.720185 4.868653 4.864932; 6 2.193817 3.297981 2.499548; 1 2.241297 2.552110 3.301100; 1 3.215284 3.622697 2.273257; 1 1.811909 2.786416 1.605322; 1 -1.707456 5.147675 5.922494; 1 -0.903559 2.940189 6.073388; 1 0.440933 3.272704 4.738487; 1 -2.715073 5.076581 4.453960;                                                                                                                                                                                  |
| 20       | 77 -0.431244 2.530743 4.621166; 6 -2.592915 3.613246 5.835155; 6 -1.265449 3.531506 6.245176; 6 0.937807 4.311324 3.761344; 6 -0.044010 3.959984 2.780410; 6 0.163186 2.577371 2.403025; 6 1.283853 2.081610 3.159945; 6 1.750223 3.152520 4.013082; 6 2.978400 3.109186 4.878646; 6 1.955761 0.748965 2.978459; 6 -0.542897 1.859181 1.287096; 6 -1.026835 4.909494 2.159846; 6 1.119551 5.677981 4.356451; 1 0.093897 1.741936 5.904086; 6 -0.856564 4.081928 7.463237; 6 0.556322 3.986397 7.987349; 6 -1.848713 4.745085 8.212351; 1 -1.566357 5.186415 9.167936; 6 -3.183111 4.855852 7.798072; 6 -4.196480 5.589684 8.649025; 6 -3.566545 4.268535 6.579256; 1 -4.601738 4.321330 6.243860; 6 -2.580172 2.847675 4.543091; 1 -1.597827 2.143148 1.229295; 1 -0.502087 7.074916 1.421386; 1 -0.082851 2.092726 0.316738; 1 -1.868572 4.380657 1.704326; 1 -0.546076 5.501373 1.368574; 1 -1.430976 5.611115 2.896479; 1 0.159030 6.145459 4.592483; 1 1.648919 6.338800 3.655975; 1 1.704093 5.640403 5.278981; 1 3.185177 2.094500 5.229214; 1 2.875370 3.748193 5.759645; 1 3.859499 3.452875 4.319067; 1 1.247825 -0.013992 1.643837; 1 2.404513 0.394344 3.910518; 1 2.755490 0.814180 2.227483; 1 -2.828198 3.626044 3.646502; 1 -3.158048 1.921464 4.547789; 1 -1.064428 1.077593 4.694597; 1 -5.091354 4.980056 8.826865; 1 -4.533796 6.517636 8.167463; 1 -3.778648 5.859757 9.624738; 1 1.229317 4.690913 7.478971; 1 0.968457 2.982531 7.832147; 1 0.601006 4.212758 9.058372;                                                                                                                                                                                           |
| 20-21_ts | 77 -0.286055 2.740808 4.669262; 6 -2.518681 3.655591 5.915792; 6 -1.176428 3.668103 6.295042; 6 1.140909 4.416280 3.846998; 6 0.353982 3.993890 2.739844; 6 0.612908 2.582506 2.507585; 6 1.568046 2.140276 3.467727; 6 1.863401 3.261563 4.350851; 6 2.988967 3.297052 5.346539; 6 2.243368 0.798603 3.508633; 6 0.063313 1.782105 1.360061; 6 -0.532838 4.860997 1.893560; 6 1.255067 5.818904 4.370880; 1 -0.130251 1.616210 5.789670; 6 -0.818771 4.185913 7.546796; 6 0.598791 4.173690 8.067419; 6 -1.853037 4.711493 8.343345; 1 -1.595549 5.121959 9.319728; 6 -3.200551 4.714109 7.957123; 6 -4.261440 5.311809 8.854640; 6 -3.541192 4.153189 6.716347; 1 -4.582633 4.106877 6.399510; 6 -2.563131 2.981521 4.572480; 1 -0.973877 2.051860 1.138025; 1 0.088396 0.709435 1.570483; 1 0.648908 1.955381 0.446291; 1 -1.408771 4.313003 1.530763; 1 0.005141 5.230428 1.009171; 1 -0.891683 5.733608 2.447296; 1 0.330223 6.383495 4.222290; 1 2.061993 6.359769 3.856836; 1 1.478134 5.830737 5.440466; 1 3.097401 2.338954 5.862793; 1 2.831438 4.064423 6.107848; 1 3.943142 3.515250 4.845869; 1 1.606607 0.013395 3.091620; 1 2.495633 0.509387 4.532338; 1 3.176361 0.815576 2.927632; 1 -2.657083 3.638242 3.703996; 1 -3.308412 2.182424 4.480701; 1 -1.576073 1.750528 4.497265; 1 -5.189334 4.728303 8.825073; 1 -4.517889 6.337063 8.552778; 1 -3.926404 5.355690 9.896794; 1 1.199565 4.990075 7.642375; 1 1.101422 3.235436 7.810006; 1 0.624582 4.291139 9.156597;                                                                                                                                                                                                |
| 21       | 77 -0.054164 1.678383 5.483482; 6 -2.482190 3.309321 5.934741; 6 -1.192325 3.083676 6.474452; 6 1.669718 2.795824 4.422921; 6 0.874305 2.253375 3.402740; 6 0.842767 0.784937 3.566600; 6 1.664497 0.425218 4.653912; 6 2.063298 1.675081 5.301137; 6 3.059347 1.768564 6.417214; 6 2.037824 -0.954702 5.109488; 6 0.132789 -0.145077 2.628902; 6 0.213357 2.990757 2.276863; 6 2.060826 4.230120 4.613427; 1 -0.590585 0.668249 6.621650; 6 -0.829866 3.812947 7.627969; 6 0.492322 3.588011 8.328988; 6 -1.713031 4.756839 8.170921; 1 -1.410976 5.301395 9.065291; 6 -2.971521 5.007704 7.620555; 6 -3.895029 6.050205 8.208223; 6 -3.341289 4.255511 6.503191; 1 -4.330332 4.397876 6.067324; 6 -2.961142 2.522918 4.728994; 1 -0.858345 0.235194 2.362483; 1 0.002827 -1.136781 3.069530; 1 0.701483 -0.262479 1.695838; 1 -0.770925 2.572373 2.045188; 1 0.818452 2.925325 1.361556; 1 0.078714 4.049680 2.512562; 1 1.362677 4.906909 4.113557; 1 3.062725 4.417052 4.201966; 6 1.181732 4.503760 5.671483; 1 2.911991 0.969687 7.149023; 1 2.990098 2.723302 6.942157; 1 4.079084 1.675767 6.016323; 1 1.303441 -1.697357 4.785483; 1 2.100991 -1.010620 6.199757; 1 3.014981 -1.250158 4.702151; 1 -4.055425 2.524067 4.655957; 1 -2.641624 1.469746 4.780902; 1 -2.570244 2.934431 3.788322; 1 -4.947964 5.779542 8.067715; 1 -3.750173 7.033236 7.737929; 1 -3.722333 6.179513 9.282803; 1 1.323693 4.083052 7.807925; 1 0.733833 2.521219 8.381710; 1 0.472844 3.988677 9.349028;                                                                                                                                                                                           |
| 21-22_ts | 77 -0.270220 1.648165 3.708754; 6 -1.428887 -0.276332 2.949037; 6 -0.038599 -0.489077 3.070072; 6 0.626850 4.480487 2.186138; 6 -0.419648 1.123805 1.373470; 6 -1.657025 0.703981 1.875042; 6 -3.020247 1.093030 1.383037; 6 -0.140179 2.052259 0.228401; 6 2.080697 0.462624 1.810152; 6 0.655447 -1.537898 3.889652; 6 -2.519759 -1.048786 3.633666; 1 2.703145 0.102488 2.633682; 1 2.431438 1.462036 1.537528; 6 2.249088 -0.202438 0.950193; 1 1.623278 -1.182416 4.253889; 1 0.835176 -2.442178 3.290704; 1 0.061092 -1.827945 4.761007; 1 -2.162365 -1.517456 4.555175; 1 -2.906001 -1.849095 2.985490; 1 -3.369587 -0.409733 3.895077; 1 -2.974214 1.911037 0.659417; 1 -3.673733 1.409982 2.202474; 1 -3.510164 0.241694 0.890441; 1 0.553886 2.847032 0.520974; 1 -1.051762 2.528927 -0.142162; 1 0.313041 1.507212 -0.611046; 6 1.923053 6.058822 3.242925; 6 0.615933 5.834247 2.816954; 1 0.075052 6.640682 2.321485; 6 -0.032792 4.602070 3.003254; 6 0.628202 3.508914 3.630266; 6 1.956483 3.756246 4.090255; 6 2.567462 4.999998 3.888127; 1 3.587200 5.145776 4.243753; 6 2.623674 7.375886 3.000879; 1 3.200786 7.693555 3.877954; 1 1.909047 8.171841 2.763456; 1 3.329954 7.311452 2.161257; 6 -1.479675 4.535428 2.556154; 6 2.781743 2.714379 4.820894; 1 2.339837 2.461455 5.792172; 1 3.798722 3.081899 5.001347; 1 2.853492 1.777554 4.260792; 1 -1.690825 5.285775 1.784574; 1 -2.155984 4.735551 3.397202; 1 0.525404 1.471060 5.062935; 77 -2.112339 4.176294 8.466028; 6 -3.671808 3.730887 10.005591; 6 -3.717703 5.147150 9.699808; 6 -2.380314 3.480319 10.596299; 6 -4.808529 2.755890 9.890965; 6 -2.512485 5.767953 10.197880; 6 -4.911070 5.876666 |

|         |                                                                                                                                                                                                                                                                                                                                                                                                                                                                                                                                                                                                                                                                                                                                                                                                                                                                                                                                                                                                                                                                                                                                                                                                                                                                                                                                                                                                                                                                                                                                                                                                                                                                                                                                                                                                                                                                                                                                                                                                                                                                                                                                                                                                                                                                                                                                                                                                                                                                                                                                                                                                                                                                                                                                                                                                                                                                                                                                                                                                                                     |
|---------|-------------------------------------------------------------------------------------------------------------------------------------------------------------------------------------------------------------------------------------------------------------------------------------------------------------------------------------------------------------------------------------------------------------------------------------------------------------------------------------------------------------------------------------------------------------------------------------------------------------------------------------------------------------------------------------------------------------------------------------------------------------------------------------------------------------------------------------------------------------------------------------------------------------------------------------------------------------------------------------------------------------------------------------------------------------------------------------------------------------------------------------------------------------------------------------------------------------------------------------------------------------------------------------------------------------------------------------------------------------------------------------------------------------------------------------------------------------------------------------------------------------------------------------------------------------------------------------------------------------------------------------------------------------------------------------------------------------------------------------------------------------------------------------------------------------------------------------------------------------------------------------------------------------------------------------------------------------------------------------------------------------------------------------------------------------------------------------------------------------------------------------------------------------------------------------------------------------------------------------------------------------------------------------------------------------------------------------------------------------------------------------------------------------------------------------------------------------------------------------------------------------------------------------------------------------------------------------------------------------------------------------------------------------------------------------------------------------------------------------------------------------------------------------------------------------------------------------------------------------------------------------------------------------------------------------------------------------------------------------------------------------------------------------|
|         | 9.149772; 6 -1.681152 4.741258 10.733826; 6 -1.924395 2.168711 11.168789; 1 -5.464966 3.002025 9.050932; 1 -5.425455 2.752196 10.802408; 1 -4.447232 1.735075 9.733547; 6 -2.198164 7.235669 10.160190; 1 -4.615935 6.770753 8.591850; 1 -5.581784 6.198689 9.958853; 1 -5.489634 5.240701 8.473533; 6 -0.341482 4.932491 11.385554; 1 -2.369191 1.323224 10.636074; 1 -2.213771 2.084344 12.225833; 1 -0.837413 2.057318 11.115067; 1 -1.121357 7.415762 10.078531; 1 -2.547214 7.742952 11.071037; 1 -2.679559 7.728565 9.309939; 1 0.292190 4.048091 11.269269; 1 -0.446119 5.119207 12.464128; 1 0.197957 5.783580 10.957807; 1 -1.318094 4.925606 6.613242; 6 -2.655873 4.389708 6.362944; 6 -0.432824 3.938532 7.142157; 6 -2.801542 3.041407 5.758020; 1 -3.419421 5.123160 6.104625; 6 -1.014112 2.618796 7.320561; 1 0.580325 4.185785 7.446472; 6 -1.916580 2.132666 6.235389; 1 -1.945721 1.076797 5.985318; 6 -3.953396 2.758852 4.838338; 1 -3.915422 3.360289 3.921764; 1 -3.990671 1.702731 4.556290; 1 -4.900408 3.006949 5.339791; 6 -0.203381 1.565266 8.043056; 1 0.438551 2.009632 8.811094; 1 -0.851648 0.829039 8.532498; 1 0.437423 1.020535 7.334649; 6 -0.915647 6.348508 6.339132; 1 -0.516616 6.437431 5.321089; 1 -1.775234 7.022436 6.429374; 1 -0.140206 6.686255 7.035321; 1 -1.748147 3.551857 2.163462;                                                                                                                                                                                                                                                                                                                                                                                                                                                                                                                                                                                                                                                                                                                                                                                                                                                                                                                                                                                                                                                                                                                                                                                                                                                                                                                                                                                                                                                                                                                                                                                                                                                                                            |
| 22      | 77 -0.905497 2.257283 4.302649; 6 -1.874193 0.193281 3.557133; 6 -0.442353 0.136638 3.535976; 6 0.018775 1.110327 2.572974; 6 -1.153516 1.698839 1.950655; 6 -2.309878 1.136449 2.549252; 6 -3.731185 1.354545 2.113465; 6 -1.100741 2.627711 0.772510; 6 1.417002 1.262263 2.042243; 6 0.416764 6 -0.850221 4.277186; 6 -2.773991 -0.720308 4.340666; 1 2.156604 0.837468 2.726582; 1 1.674010 2.314327 1.884520; 1 1.527290 0.743330 1.079170; 1 1.420723 -0.453950 4.452944; 1 0.523470 -1.783347 3.705909; 1 -0.009303 -1.107658 5.251508; 1 -2.283216 -1.089517 5.246252; 1 -3.060205 -1.598039 3.744165; 1 -3.700553 -0.223283 4.646713; 1 -3.900252 2.374705 1.755358; 1 -4.440962 1.168892 2.924279; 1 -3.995010 0.672859 1.292195; 1 -0.443154 3.481621 0.963300; 1 -2.089487 3.016855 0.516061; 1 -0.713838 2.100705 -0.110698; 6 1.230589 6.579088 3.021290; 6 -0.121109 6.334601 2.798700; 1 -0.716519 7.088883 2.284550; 6 -0.754092 5.151134 3.213892; 6 -0.031657 4.126967 3.885161; 6 1.352602 4.385747 4.121948; 6 1.942903 5.584076 3.691637; 1 3.002189 5.742542 3.890360; 6 1.902478 7.842831 2.535980; 1 2.688956 8.170855 3.225740; 1 1.183967 8.663474 2.430402; 1 2.376086 7.699001 1.554654; 6 -2.238826 5.078402 2.921045; 6 2.281233 3.437538 4.859052; 1 1.971266 3.295828 5.901398; 1 3.302756 3.834519 4.871216; 1 2.316046 2.444745 4.401232; 1 -2.490602 5.676525 2.037286; 1 -2.824265 5.480699 3.757382; 1 0.315979 2.228540 5.270567; 77 -2.043714 4.105612 8.592977; 6 -3.902181 3.772761 9.793654; 6 -3.756467 5.193549 9.560484; 6 -2.774206 3.367655 10.602323; 6 -5.086812 2.922903 9.431935; 6 -2.601676 5.664503 10.289880; 6 -4.749855 6.065529 8.844968; 6 -1.994769 4.539407 10.927593; 6 -2.567424 1.995408 11.177515; 1 -5.581572 3.288719 8.527278; 1 -5.836233 2.917113 10.238141; 1 -4.794137 1.884891 9.246259; 6 -2.146861 7.092091 10.389828; 1 -4.267833 6.936883 8.391074; 1 -5.517939 6.436764 9.538269; 1 -5.259954 5.518418 8.046965; 6 -0.793923 4.574023 11.829263; 1 -2.972104 1.221021 10.519143; 1 -3.070707 1.899013 12.150054; 1 -1.506865 1.774936 11.332499; 1 -1.062661 7.161434 10.524709; 1 -2.616757 7.602362 11.242980; 1 -2.403315 7.660562 9.490483; 1 -0.248732 3.625560 11.810453; 1 -1.085067 4.761708 12.872989; 1 -0.093427 5.363770 11.539397; 6 -0.811678 4.840773 6.974724; 6 -2.113712 4.526432 6.431237; 6 -0.189737 3.709077 7.592007; 6 -2.398682 3.237592 5.710622; 1 -2.706915 5.384182 6.114986; 6 -0.946915 2.476197 7.558625; 1 0.761571 3.798268 8.110794; 6 -1.736860 2.138846 6.324254; 1 -2.251481 1.178226 6.379582; 6 -3.845098 3.083413 5.279106; 1 -4.136757 3.780292 4.488035; 1 -4.055108 2.068541 4.932498; 1 -4.492636 3.278870 6.147315; 6 -0.398712 1.290838 8.323627; 1 0.122009 1.604325 9.234601; 1 -1.196991 0.598588 8.616458; 1 0.313737 0.724836 7.703738; 6 -0.188902 6.209497 6.935815; 1 0.371462 6.344675 6.003246; 1 -0.958026 6.988703 6.980717; 1 0.499897 6.358640 7.775406; 1 -2.580823 4.056814 2.756174; |
| 22-9_ts | 77 -1.118240 2.373939 4.281747; 6 -1.946835 0.378674 3.599343; 6 -0.499827 0.228488 3.597978; 6 0.007764 1.106531 2.605899; 6 -1.122664 1.727357 1.917782; 6 -2.316552 1.239089 2.487666; 6 -3.716643 1.492381 2.008667; 6 -0.980715 2.635461 0.730678; 6 1.428034 1.219993 2.130078; 6 0.278347 -0.758627 4.420428; 6 -2.893478 -0.536017 4.327168; 1 2.132131 0.771961 2.836391; 1 1.723970 2.262593 1.976253; 1 1.553255 0.698993 1.170006; 1 1.316664 -0.441208 4.556599; 1 0.296711 -1.748144 3.939604; 1 -0.157945 -0.887519 5.415568; 1 -2.511237 -0.818403 5.313102; 1 -3.045485 -1.465430 3.759870; 1 -3.877645 -0.080639 4.472046; 1 -3.782693 2.408035 1.413232; 1 -4.423010 1.588942 2.837888; 1 -4.069653 0.664729 1.376416; 1 -0.286715 3.458040 0.933192; 1 -1.938826 3.074498 0.438693; 1 -0.592790 2.085216 -0.138094; 6 1.448338 6.368857 2.648310; 6 0.053505 6.313477 2.618998; 1 -0.491862 7.103674 2.105389; 6 -0.680840 5.276718 3.213090; 6 0.009164 4.217457 3.863031; 6 1.428244 4.288505 3.933571; 6 2.114056 5.344416 3.321391; 1 3.200420 5.370468 3.389839; 6 2.204260 7.483842 1.964243; 1 3.166144 7.674994 2.452779; 1 1.631594 8.417995 1.967241; 1 2.417471 7.238989 0.914480; 6 -2.185084 5.340136 3.081597; 6 2.241396 3.300562 4.746162; 1 2.176892 3.539435 5.816728; 1 3.299129 3.339060 4.464384; 1 1.881473 2.277023 4.633946; 1 -2.479382 6.167348 2.425937; 1 -2.665613 5.493033 4.051714; 1 -0.180224 3.468238 5.059757; 77 -2.127771 4.075904 8.624777; 6 -3.922462 3.609817 9.875952; 6 -3.874914 5.400774 9.665299; 6 -2.747416 3.262772 10.643121; 6 -5.064311 2.693777 9.538917; 6 -2.728469 5.570615 10.365649; 6 -4.944700 5.858815 8.997852; 6 -2.031564 4.475464 10.963232; 6 -2.441459 1.897171 11.188396; 1 -5.603375 3.033544 8.649663; 1 -5.790200 2.641015 10.364745; 1 -4.717272 1.675175 9.340163; 6 -2.362472 7.022622 10.479564; 1 -4.535433 6.769549 8.549467; 1 -5.715062 6.164248 9.720256; 1 -5.440602 5.294484 8.202909; 6 -0.806334 4.571021 11.826994; 1 -2.792898 1.110082 10.514694; 1 -2.932007 1.744663 12.160324; 1 -1.367400 1.749735 11.335336; 1 -1.281558 7.160417 10.586433; 1 -2.839579 7.487176 11.354629; 1 -2.681068 7.588528 9.598585; 1 -0.200882 3.661498 11.768512; 1 -1.073835 4.717106 12.883655; 1 -0.169138 5.411323 11.533125; 6 -1.005603 4.896113 6.982051; 6 -2.306772 4.511852 6.475523; 6 -0.293730 3.790744 7.559710; 6 -2.556298 3.223394 5.727400; 1 -2.962830 5.342677 6.213007; 6 -0.978770 2.518918 7.522232; 1 0.669245 3.929005 8.045963; 6 -1.786935 2.149274 6.305310; 1 -2.261451 1.170837 6.396224; 6 -4.017820 3.029338 5.373787; 1 -4.352842 3.729540 4.598602; 1 -4.217237 2.014935 5.019634; 1 -4.641814 3.198699 6.264671; 6 -0.343841 1.356781 8.255814; 1 0.210856 1.688198 9.140390; 1 -1.096665 0.630862 8.585558; 1 0.356618 0.823428 7.595590; 6 -0.455995 6.296879 6.935307; 1 0.064320 6.474500 5.985438; 1 -1.262032 7.035040 7.014513; 1 0.253012 6.475734 7.751868; 1 -2.590457 4.409242 2.676729;    |
| 6-23_ts | 6 6.652048 6.945402 1.741664; 6 6.635014 7.351558 0.354610; 6 5.382714 8.018025 0.088806; 6 4.637222 8.064107 1.310238; 6 5.432455 7.439793 2.338796; 6 7.585774 5.954452 2.372882; 1 8.563250 5.944054 1.887862; 1 7.167920 4.939524 2.295450; 1 7.753355 6.164414 3.431940; 6 7.645247 6.960471 -0.684963; 1 7.651159 7.660417 -1.525772; 1 7.422372 5.962553 -1.088026; 1 8.656544 6.933769 -0.272905; 6 4.914372 8.514289 -1.249366; 1 4.239661 9.370548 -1.149900; 1 4.369225 7.729375 -1.792556; 1 5.752433 8.824787 -1.880227; 6 3.253211 8.620064 1.481924; 1 3.086953 8.979721 2.501920; 1 2.493031 7.852557 1.279405; 1 3.062850 9.455549 0.800615; 6 4.990772 7.171139                                                                                                                                                                                                                                                                                                                                                                                                                                                                                                                                                                                                                                                                                                                                                                                                                                                                                                                                                                                                                                                                                                                                                                                                                                                                                                                                                                                                                                                                                                                                                                                                                                                                                                                                                                                                                                                                                                                                                                                                                                                                                                                                                                                                                                                                                                                                                   |





|          |                                                                                                                                                                                                                                                                                                                                                                                                                                                                                                                                                                                                                                                                                                                                                                                                                                                                                                                                                                                                                                                                                                                                                                                                                                                                                                                                                                                                                                                                                                                                                                                                                                                                                                                                                                                                                                                                                                                                                                                                                                                                                                                                                                                                                                                                                                                                                |
|----------|------------------------------------------------------------------------------------------------------------------------------------------------------------------------------------------------------------------------------------------------------------------------------------------------------------------------------------------------------------------------------------------------------------------------------------------------------------------------------------------------------------------------------------------------------------------------------------------------------------------------------------------------------------------------------------------------------------------------------------------------------------------------------------------------------------------------------------------------------------------------------------------------------------------------------------------------------------------------------------------------------------------------------------------------------------------------------------------------------------------------------------------------------------------------------------------------------------------------------------------------------------------------------------------------------------------------------------------------------------------------------------------------------------------------------------------------------------------------------------------------------------------------------------------------------------------------------------------------------------------------------------------------------------------------------------------------------------------------------------------------------------------------------------------------------------------------------------------------------------------------------------------------------------------------------------------------------------------------------------------------------------------------------------------------------------------------------------------------------------------------------------------------------------------------------------------------------------------------------------------------------------------------------------------------------------------------------------------------|
|          | 7.015147 1.886213; 1 11.462910 6.075744 1.702323; 1 10.031589 7.036961 1.264363; 1 11.566232 7.840226 1.543935; 6 11.759260 5.773803 6.692042; 1 11.646969 4.702499 6.481795; 1 12.835922 5.989210 6.667457; 1 11.405016 5.957447 7.711288;                                                                                                                                                                                                                                                                                                                                                                                                                                                                                                                                                                                                                                                                                                                                                                                                                                                                                                                                                                                                                                                                                                                                                                                                                                                                                                                                                                                                                                                                                                                                                                                                                                                                                                                                                                                                                                                                                                                                                                                                                                                                                                    |
| 24       | 6 6.931909 6.939793 1.821628; 6 7.013474 7.518854 0.499633; 6 5.717013 8.060745 0.176703; 6 4.836837 7.810163 1.285759; 6 5.585052 7.135446 2.306978; 6 7.946891 6.049038 2.468834; 1 8.952174 6.301466 2.137369; 1 7.750172 4.996299 2.215164; 1 7.931274 6.141425 3.557677; 6 8.176126 7.420874 -0.443074; 1 8.155279 8.225368 -1.184307; 1 8.161993 6.466584 -0.989244; 1 9.122709 7.496717 0.093394; 6 5.318221 8.664921 -1.139691; 1 4.517807 9.402428 1.242763; 1 4.952725 7.892468 -1.831228; 1 6.161330 9.164233 -1.625258; 6 3.373910 8.144335 1.338310; 1 3.032745 8.308778 2.364686; 1 2.770040 7.326208 0.921143; 1 3.141736 9.045066 0.761136; 6 5.041711 6.602238 3.601565; 1 5.808744 6.596104 4.381532; 1 4.681236 5.570342 3.484981; 1 4.201569 7.201930 3.966242; 6 7.566965 11.155868 1.504378; 6 6.191895 11.282718 1.923860; 1 5.404972 11.619789 1.251142; 6 5.865453 10.780281 3.229054; 6 7.001538 10.200117 3.918176; 1 6.778605 9.642665 4.828024; 6 8.331600 10.871018 3.864096; 6 8.640250 11.353141 2.517206; 77 6.627650 9.171305 2.004498; 1 10.820925 6.146729 1.255131; 6 11.564049 6.936460 1.108673; 6 11.450527 8.042113 2.120951; 1 11.461899 7.305728 0.083741; 1 12.550402 6.454664 1.181354; 6 11.785392 9.393677 1.891501; 6 11.202349 7.840340 3.542932; 6 11.686493 10.089770 3.170766; 6 12.248096 10.011744 0.603213; 6 11.387560 9.089222 4.198222; 6 11.053036 6.511219 4.229092; 77 9.623817 9.568495 2.896722; 6 12.216735 11.474253 3.420992; 1 11.872621 9.465672 -0.268255; 1 13.347038 10.023156 0.532495; 1 11.908151 11.048193 0.510270; 6 11.464065 9.301473 5.683163; 1 10.569291 5.766523 3.590797; 1 10.457224 6.593703 5.144118; 1 12.032143 6.095863 4.515542; 1 11.913768 12.171688 2.632572; 1 13.316244 11.473125 3.454754; 1 11.861647 11.877737 4.373675; 1 10.799579 8.617369 6.220645; 1 11.183342 10.320302 5.962895; 1 12.486630 9.128248 6.051289; 1 9.259846 12.245339 2.387128; 6 8.722634 11.643224 5.108110; 1 8.752533 10.990688 5.990266; 1 9.707966 12.107971 5.000339; 1 7.999037 12.446785 5.318608; 6 4.468006 10.817572 3.786894; 1 4.290001 9.970640 4.458665; 1 4.319414 11.735661 4.371669; 1 3.709398 10.800514 2.995790; 6 7.920020 11.480985 0.070708; 1 8.176489 12.546917 -0.027526; 1 8.792943 10.903523 -0.248799; 1 7.092792 11.271799 -0.616493; |
| 24-25_ts | 77 2.567985 4.549300 2.578901; 6 0.352120 4.809122 1.978770; 6 1.074525 5.905482 1.395920; 6 1.651596 6.678747 2.459470; 6 1.305670 6.041827 3.708182; 6 0.493931 4.881296 3.413156; 6 4.034390 3.596935 3.881317; 6 4.597696 4.726987 3.172328; 6 4.577009 4.549061 1.740455; 6 4.371727 3.250137 1.184502; 77 2.627712 1.500930 2.372249; 6 4.578560 2.069890 2.005757; 6 4.348256 3.110125 -0.318583; 6 4.305945 2.199389 3.436699; 6 5.031968 1.336240 4.449611; 6 2.659534 -0.682802 2.302410; 6 1.691401 -0.321708 3.330799; 6 0.565767 0.269458 2.679765; 6 0.815253 0.253582 1.247134; 6 2.076304 -0.347265 1.015997; 6 2.669488 -0.681725 -0.322607; 6 -0.173824 0.596024 0.167177; 6 -0.765568 0.519320 3.330214; 6 1.776199 -0.697103 4.783237; 6 3.854298 -1.577124 2.486153; 6 5.177152 5.948730 3.832755; 6 -0.234248 4.049050 4.425880; 6 1.589344 6.578601 5.081862; 6 2.390606 7.975858 2.297324; 6 1.119672 6.242446 -0.066890; 6 -0.577054 3.909103 1.226645; 1 4.806059 5.388897 1.086823; 1 5.223424 1.281977 1.614503; 1 3.871019 3.727767 4.951359; 1 5.092705 6.838077 3.197401; 1 6.244976 5.792423 4.040563; 1 4.685713 6.154970 4.789706; 1 3.809570 3.937468 -0.792070; 1 3.876133 2.172787 -0.621255; 1 5.376896 3.118242 -0.710855; 1 -0.170269 3.621228 0.253954; 1 -1.538652 4.414589 1.050649; 1 -0.773578 2.996831 1.786860; 1 1.079781 5.340612 -0.685172; 1 2.033062 6.785663 -0.329143; 1 0.268337 6.876141 -0.355166; 1 3.001370 7.983868 1.388440; 1 3.052780 8.174976 3.144753; 1 1.690418 8.820321 2.225981; 1 5.223372 0.330630 4.064655; 1 4.449156 1.238822 5.374471; 1 6.003880 1.777827 4.721601; 1 2.496823 7.189583 5.100105; 1 1.717343 5.771177 5.809116; 1 0.761886 7.210806 5.433686; 1 -0.285492 3.005759 4.114662; 1 -1.260365 4.415921 4.577051; 1 0.210780 4.074791 5.396007; 1 2.811294 -0.705244 5.136974; 1 1.359825 -1.700523 4.960283; 1 1.222222 0.006650 5.412233; 1 4.686395 -1.291439 1.832743; 1 3.599648 -2.620940 2.250186; 1 4.220058 -1.558685 3.516426; 1 2.318437 0.002000 -1.102593; 1 2.396428 -1.700831 -0.637018; 1 3.763280 -0.633051 -0.305743; 1 0.289306 1.148155 -0.658229; 1 -1.003417 1.198266 0.542791; 1 -0.611009 -0.317868 -0.261951; 1 -1.329857 1.325812 2.852413; 1 -0.659566 0.771769 4.389542; 1 -1.398775 -0.380135 3.275771;                     |
| 25       | 77 2.377428 4.409111 2.644126; 6 0.106051 4.864895 2.142982; 6 0.895781 5.874101 1.509932; 6 1.587481 6.606154 2.536159; 6 1.244036 6.024232 3.807716; 6 0.330457 4.935755 3.571441; 6 4.021521 3.772791 3.879983; 6 4.442248 4.678166 2.833198; 6 4.209915 4.106163 1.527480; 6 4.455588 2.654007 1.315290; 77 2.801373 1.569532 2.265471; 6 4.854299 1.887817 2.470878; 6 4.939098 2.258000 -0.061069; 6 4.268627 2.313450 3.718241; 6 4.541048 1.538875 4.987897; 6 2.756910 -0.748986 2.057912; 6 1.868944 -0.402423 3.136578; 6 0.809281 0.397495 2.603199; 6 1.029978 0.538510 1.173143; 6 2.224102 -0.182763 0.846740; 6 2.714985 -0.437723 -0.548909; 6 0.052849 1.035443 0.144944; 6 -0.451831 0.711195 3.352770; 6 1.950693 -0.906072 4.548639; 6 3.941668 -1.668742 2.153197; 6 5.118060 5.999675 3.077079; 6 -0.460021 4.236687 4.641033; 6 1.639068 6.548750 5.159212; 6 2.370660 7.868170 2.315925; 6 0.896139 6.206460 0.045140; 6 -1.003401 4.126250 1.457962; 1 4.356788 4.748921 0.659088; 1 5.475627 0.997432 2.392549; 1 4.025847 4.148023 4.903946; 1 4.958101 6.699357 2.250295; 1 6.202586 5.845379 3.171539; 1 4.773414 6.470298 4.005175; 1 4.221380 2.558875 -0.833452; 1 5.091236 1.177974 -0.144773; 1 5.894804 2.752032 -0.293709; 1 -0.731796 3.821278 0.444780; 1 -1.889220 4.774633 1.379277; 1 -1.306802 3.236811 2.010686; 1 0.696087 5.321116 -0.565639; 1 1.860345 6.614771 -0.274747; 1 0.127734 6.955808 -0.197113; 1 2.952980 7.832090 1.389077; 1 3.063002 8.071988 3.136912; 1 1.694313 8.731701 2.239097; 1 4.709091 0.475987 4.787880; 1 3.702583 1.621473 5.689242; 1 5.434579 1.929441 5.498425; 1 2.606398 7.060360 5.131505; 1 1.713248 5.741311 5.894281; 1 0.899175 7.269583 5.536244; 1 -0.853734 3.279868 4.294974; 1 -1.316378 4.848242 4.964351; 1 0.151217 4.037623 5.527136; 1 2.977011 -1.150540 4.837242; 1 1.350878 -1.819512 4.674044; 1 1.574318 -0.167104 5.262746; 1 4.692702 -1.444239 1.389075; 1 3.640769 -2.717305 2.015390; 1 4.433227 -1.598795 3.128733; 1 2.597729 0.444279 -1.185941; 1 2.146657 -1.256402 -1.014626; 1 3.770179 -0.725461 -0.568533; 1 0.516564 1.732439 -0.560947; 1 -0.793561 1.544779 0.605518; 1 -0.352208 0.196024 -0.439311; 1 -1.025672 1.505488 2.873972; 1 -0.246799 1.020151 4.381624; 1 -1.102534 -0.175154 3.398799;                       |
| 25-26_ts | 6 6.470086 6.808344 1.184315; 6 7.067046 7.584967 0.117785; 6 6.061169 8.503229 -0.348873; 6 4.841054 8.254238 0.382904; 6 5.088860 7.193751 1.311931; 6 7.112540 5.647163 1.888625; 1 8.195541 5.770843 1.955250; 1 6.916789 4.706690 1.353895; 1 6.729816 5.530228 2.907559; 6 8.391230 7.336080 -0.538389; 1 8.833814 8.262449 -0.915267; 1 8.289348 6.643935 -1.388180; 1 9.103216 6.894219 0.161406; 6 6.203356 9.407136 -1.539600; 1 5.523518 10.262196 -1.487813; 1 5.977786 8.863365 -2.468089; 1 7.221078 9.799173 -1.625351; 6 3.518893 8.926870 0.144927; 1 2.922040 8.980871 1.061218; 1 2.924148 8.380420 -0.601120; 1 3.647086 9.948159 -0.226346; 6 4.081088 6.579403 2.240018; 1 4.556486 6.169804 3.136670; 1 3.539379 5.755555 1.753325; 1 3.334597 7.310683 2.567491; 6 7.095905 11.121108 1.948602; 6 6.029699 10.761076 2.861778; 1 5.014011 11.149554 2.813026; 6                                                                                                                                                                                                                                                                                                                                                                                                                                                                                                                                                                                                                                                                                                                                                                                                                                                                                                                                                                                                                                                                                                                                                                                                                                                                                                                                                                                                                                                        |

|         |                                                                                                                                                                                                                                                                                                                                                                                                                                                                                                                                                                                                                                                                                                                                                                                                                                                                                                                                                                                                                                                                                                                                                                                                                                                                                                                                                                                                                                                                                                                                                                                                                                                                                                                                                                                                                                                                                                                                                                                                                                                                                                                                                                                                                                                                                                                                                                                                                                                                                                                                                                                                                                                                                                                                                                                                                                                                                                                                                                                                                                     |
|---------|-------------------------------------------------------------------------------------------------------------------------------------------------------------------------------------------------------------------------------------------------------------------------------------------------------------------------------------------------------------------------------------------------------------------------------------------------------------------------------------------------------------------------------------------------------------------------------------------------------------------------------------------------------------------------------------------------------------------------------------------------------------------------------------------------------------------------------------------------------------------------------------------------------------------------------------------------------------------------------------------------------------------------------------------------------------------------------------------------------------------------------------------------------------------------------------------------------------------------------------------------------------------------------------------------------------------------------------------------------------------------------------------------------------------------------------------------------------------------------------------------------------------------------------------------------------------------------------------------------------------------------------------------------------------------------------------------------------------------------------------------------------------------------------------------------------------------------------------------------------------------------------------------------------------------------------------------------------------------------------------------------------------------------------------------------------------------------------------------------------------------------------------------------------------------------------------------------------------------------------------------------------------------------------------------------------------------------------------------------------------------------------------------------------------------------------------------------------------------------------------------------------------------------------------------------------------------------------------------------------------------------------------------------------------------------------------------------------------------------------------------------------------------------------------------------------------------------------------------------------------------------------------------------------------------------------------------------------------------------------------------------------------------------------|
|         | 6.398735 9.738588 3.809239; 6 7.739684 9.192453 3.621990; 1 7.919399 8.332968 4.268394; 6 8.629591 11.117173 3.985558; 6 8.443546 11.432938 2.591318; 77 6.539294 8.995861 1.818464; 1 10.102254 6.271940 3.088686; 6 10.963620 6.609612 2.502882; 6 11.310867 8.039318 2.798075; 1 10.735002 6.453469 1.446067; 1 11.804338 5.948141 2.756685; 6 11.652474 9.049131 1.868129; 6 11.490007 8.551336 4.147998; 6 11.973964 10.243447 2.627170; 6 11.755115 8.930969 0.375101; 6 11.948783 9.898671 4.040435; 6 11.371071 7.735770 5.404036; 77 9.862342 9.942186 3.215376; 6 12.529049 11.511681 2.042035; 1 11.204330 8.067145 -0.004742; 1 12.803327 8.817352 0.060003; 1 11.359836 9.819045 -0.128522; 6 12.417066 10.775859 5.166677; 1 10.524187 7.042391 5.356708; 1 11.223640 8.372205 6.282171; 1 12.273458 7.131926 5.583892; 1 12.047085 11.754451 1.089592; 1 13.609714 11.426970 1.854987; 1 12.376787 12.362992 2.712933; 1 11.901897 10.539390 6.102823; 1 12.241801 11.834195 4.951070; 1 13.495511 10.648624 5.339904; 1 8.845703 12.393852 2.255433; 6 8.248176 11.754714 5.274247; 1 8.502566 11.131189 6.137209; 1 8.813276 12.695164 5.356206; 1 7.183136 12.016976 5.309218; 6 5.450695 9.252312 4.875754; 1 5.617434 8.192918 5.098729; 1 5.596803 9.813298 5.809573; 1 4.405672 9.380342 4.569985; 6 6.760289 12.018315 0.774402; 1 6.797281 13.079031 1.066789; 1 7.480815 11.884350 -0.040875; 1 5.759907 11.814266 0.378974;                                                                                                                                                                                                                                                                                                                                                                                                                                                                                                                                                                                                                                                                                                                                                                                                                                                                                                                                                                                                                                                                                                                                                                                                                                                                                                                                                                                                                                                                                                                                                                               |
| 26      | 6 -1.858378 -2.550782 -1.433437; 6 -1.345157 -1.666257 -2.462209; 6 -2.396627 -0.732456 -2.775267; 6 -3.556210 -1.062995 -1.983495; 6 -3.226000 -2.191745 -1.167041; 6 -1.157605 -3.765921 -0.895002; 1 -0.072022 -3.640257 -0.908271; 1 -1.394751 -4.656579 -1.494688; 1 -1.452541 -3.979702 0.137680; 6 -0.049436 -1.820031 -3.205103; 1 0.325541 -0.855099 -3.559463; 1 -0.164519 -2.475405 -4.082033; 1 0.725889 -2.256110 -2.568646; 6 -2.350763 0.289267 -3.875330; 1 -3.002132 1.142716 -3.665900; 1 -2.679158 -0.148827 -4.828753; 1 -1.337215 0.674860 -4.021734; 6 -4.901339 -0.399476 -2.071578; 1 -5.433104 -0.435533 -1.115082; 1 -5.541562 -0.889643 -2.819744; 1 -4.813790 0.652521 -2.360261; 6 -4.157656 -2.905056 -0.229566; 1 -3.615696 -3.374091 0.597564; 1 -4.714586 -3.699988 -0.746733; 1 -4.894441 -2.221430 0.204895; 6 -1.260197 1.665718 -0.339733; 6 -2.003320 1.144562 0.793545; 1 -2.999819 1.505706 1.043057; 6 -1.451559 0.008930 1.475273; 6 -0.191903 -0.441556 0.929225; 1 0.072693 -1.448022 1.265381; 6 0.804378 2.439864 1.001606; 6 0.211385 2.036548 -0.235166; 77 -1.720745 -0.435450 -0.615205; 1 1.604464 -2.903714 0.638775; 6 2.550442 -2.608433 0.172932; 6 2.9662996 -1.223762 0.572886; 1 2.429020 -2.697461 -0.910114; 1 3.305522 -3.345007 0.482697; 6 3.500867 -0.220259 -0.262862; 6 2.955853 -0.728237 1.941807; 6 3.840822 0.915830 0.574438; 6 3.742458 -0.298477 -1.742454; 6 3.564970 0.568462 1.944525; 6 2.582708 -1.544109 3.146455; 77 1.529996 0.742757 0.815236; 6 4.571115 2.141876 0.099599; 1 3.117446 -1.061581 -2.214102; 1 4.791442 -0.545256 -1.962123; 1 3.522066 0.654086 -2.235286; 6 3.929555 1.376452 3.157978; 1 1.672895 -2.128245 2.970483; 1 2.399960 -0.909117 4.018348; 1 3.379255 -2.254014 3.412914; 1 4.231839 2.453212 -0.893668; 1 5.652869 1.956440 0.031484; 1 4.427923 2.987831 0.778810; 1 3.228813 1.204456 3.980529; 1 3.930845 2.450025 2.944787; 1 4.934542 1.115559 3.519713; 1 0.576062 2.516269 -1.153118; 6 1.001498 3.721881 1.720666; 1 1.683479 3.632753 2.572006; 1 1.377346 4.495999 1.033508; 1 0.031136 4.082772 2.091791; 6 -2.177414 -0.660288 2.614713; 1 -1.992469 -1.740210 2.616819; 1 -1.822951 -0.264580 3.577067; 1 -3.260483 -0.495345 2.562778; 6 -2.008409 2.676232 -1.201902; 1 -1.907458 3.695632 -0.797753; 1 -1.610503 2.696807 -2.223120; 1 -3.076506 2.440048 -1.260955;                                                                                                                                                                                                                                                                                                                                                                                                                                                                                                                                                                                                                                |
| 6-27_ts | 6 6.742961 6.723461 2.609052; 6 6.928022 6.805878 1.181957; 6 5.638447 7.039364 0.560003; 6 4.661493 7.138137 1.592195; 6 5.342685 7.004595 2.859391; 6 7.756784 6.270649 3.620531; 1 8.772976 6.543712 3.320307; 1 7.732083 5.177988 3.748686; 1 7.574418 6.720835 4.600894; 6 8.198813 6.486387 0.448164; 1 8.273308 7.036064 -0.494667; 1 8.250642 5.414556 0.210518; 1 9.080081 6.735210 1.046327; 6 5.378067 7.095586 -0.918002; 1 4.525976 7.741103 -1.153647; 1 5.154402 6.097216 -1.320485; 1 6.244521 7.479137 -1.464868; 6 3.186180 7.342638 1.403701; 1 2.743849 7.888129 2.243065; 1 2.657274 6.382008 1.325899; 1 2.970269 7.908208 0.491587; 6 4.674944 6.946935 4.204550; 1 5.355956 7.257679 5.002039; 1 4.341124 5.924849 4.432092; 1 3.795801 7.597255 4.247131; 6 7.916458 10.329528 1.468984; 6 6.592465 10.756373 1.076909; 1 6.314608 10.937983 0.042036; 6 5.635694 10.853038 2.134589; 6 6.188477 10.468446 3.425557; 1 5.469906 10.377797 4.239086; 6 7.579205 10.792798 3.819650; 6 8.470828 10.808959 2.777272; 1 9.535351 10.701890 2.934122; 6 8.927503 10.060416 0.377057; 1 9.666772 9.313222 0.687999; 1 9.475648 10.981315 0.132427; 1 8.446228 9.696708 -0.536782; 6 4.226020 11.340259 1.941285; 1 3.858654 11.114304 0.934359; 1 4.176097 12.428130 2.082616; 1 3.547290 10.879243 2.667183; 6 7.880098 10.737035 5.290256; 1 8.936505 10.887227 5.504115; 1 7.574383 9.749925 5.672736; 1 7.308312 11.487296 5.846715; 77 6.315028 8.823985 1.970021; 1 11.403194 14.501946 0.872022; 6 11.416303 15.069907 1.807586; 6 11.109846 14.194443 2.987620; 1 10.685820 15.878355 1.713660; 1 12.411449 15.529316 1.904596; 6 10.604785 14.653093 4.282499; 6 11.364281 12.805728 3.112128; 6 10.730553 13.548371 5.234820; 6 10.511803 16.087289 4.715831; 6 11.161301 12.423716 4.517038; 6 11.996944 11.919442 2.076751; 77 9.095225 13.302778 3.445902; 6 10.482456 13.670947 6.709321; 1 10.370471 16.758301 3.867440; 1 11.440206 16.380821 5.228344; 1 9.680290 16.249497 5.407688; 6 11.527423 11.076675 5.073340; 1 11.817267 12.294974 1.065086; 1 11.616334 10.828212 2.117537; 1 13.086745 11.858543 2.218128; 6 7.631126 14.555880 2.480883; 6 7.088217 14.028516 3.743720; 1 9.586606 14.267796 6.911443; 1 11.323117 14.167215 7.217467; 1 10.344910 12.694521 7.184659; 1 11.116304 10.248321 4.484703; 1 11.185476 10.952669 6.105184; 1 12.619470 10.947834 5.075232; 6 7.902280 16.000707 2.469150; 6 7.135303 14.064174 1.129657; 1 6.402582 13.183110 3.673570; 6 6.792121 14.941968 4.847260; 6 7.612268 16.828858 3.508864; 1 8.265886 16.430742 1.534841; 1 7.859169 14.310987 0.342205; 1 6.180433 14.545359 0.860893; 1 6.988822 12.986756 1.116164; 6 6.151699 14.378319 6.090399; 6 7.055705 16.273148 4.724423; 6 7.835701 18.320136 3.433873; 1 6.821889 13.670830 6.597116; 1 5.234059 13.823275 5.848345; 1 5.890388 15.165758 6.805712; 1 6.820540 16.950603 5.544757; 1 8.202293 18.623198 2.447171; 1 8.567418 18.658310 4.181518; 1 6.907316 18.873091 3.632179; |
| 27      | 6 7.089709 6.952891 2.115296; 6 6.911123 7.201880 0.703552; 6 5.503461 7.407818 0.444911; 6 4.812045 7.338544 1.691880; 6 5.788976 7.097914 2.730462; 6 8.342979 6.455280 2.776892; 1 9.238961 6.864303 2.299930; 1 8.412489 5.357983 2.724517; 1 8.379733 6.735988 3.833484; 6 7.976982 7.055391 -0.344671; 1 7.783467 7.692667 -1.212743; 1 8.033534 6.017555 -0.702734; 1 8.962814 7.322881 0.047085; 6 4.878557 7.597916 -0.907644; 1 3.967287 8.202013 -0.850948; 1 4.604004 6.633419 -1.359036; 1 5.563004 8.096879 -1.600438; 6 3.328475 7.454381 1.892837; 1 3.087087 7.870376 2.876002; 1 2.837943 6.472547 1.825837; 1 2.867558 8.101134 1.139139; 6 5.473706 6.833161 4.176157; 1 6.319853 7.082996 4.822575; 1 5.233102 5.772648 4.337572; 1 4.614779 7.420125 4.516224; 6 7.787696 10.741154 1.218254; 6 6.390286 11.094513 1.161688; 1 5.886294 11.349740 0.232557; 6 5.671090 11.011717 2.401320; 6 6.502708 10.568330 3.499564; 1 5.959524 10.320242 4.412564; 6 7.959009 10.920273 3.694662; 6 8.631718 11.063990 2.424743; 1 9.619657 10.612230 2.322741; 6 8.538322 10.653617 -0.093924; 1 9.358378 9.928192 -0.037521; 1 8.984053 11.627039 -0.347276; 1 7.882742 10.354966 -0.919179; 6 4.205172 11.340113                                                                                                                                                                                                                                                                                                                                                                                                                                                                                                                                                                                                                                                                                                                                                                                                                                                                                                                                                                                                                                                                                                                                                                                                                                                                                                                                                                                                                                                                                                                                                                                                                                                                                                                                                                                                     |

|         |                                                                                                                                                                                                                                                                                                                                                                                                                                                                                                                                                                                                                                                                                                                                                                                                                                                                                                                                                                                                                                                                                                                                                                                                                                                                                                                                                                                                                                                                                                                                                                                                                                                                                                                                                                                                                                                                                                                                                                                                                                                                                                                                                                                                                                                                                                                                                                                                                                                                                                                                                                                                                                                                                                                                                                                                                                                                                                                                                                                                                                           |
|---------|-------------------------------------------------------------------------------------------------------------------------------------------------------------------------------------------------------------------------------------------------------------------------------------------------------------------------------------------------------------------------------------------------------------------------------------------------------------------------------------------------------------------------------------------------------------------------------------------------------------------------------------------------------------------------------------------------------------------------------------------------------------------------------------------------------------------------------------------------------------------------------------------------------------------------------------------------------------------------------------------------------------------------------------------------------------------------------------------------------------------------------------------------------------------------------------------------------------------------------------------------------------------------------------------------------------------------------------------------------------------------------------------------------------------------------------------------------------------------------------------------------------------------------------------------------------------------------------------------------------------------------------------------------------------------------------------------------------------------------------------------------------------------------------------------------------------------------------------------------------------------------------------------------------------------------------------------------------------------------------------------------------------------------------------------------------------------------------------------------------------------------------------------------------------------------------------------------------------------------------------------------------------------------------------------------------------------------------------------------------------------------------------------------------------------------------------------------------------------------------------------------------------------------------------------------------------------------------------------------------------------------------------------------------------------------------------------------------------------------------------------------------------------------------------------------------------------------------------------------------------------------------------------------------------------------------------------------------------------------------------------------------------------------------------|
|         | 2.522877; 1 3.675329 11.144768 1.583721; 1 4.055186 12.398803 2.776693; 1 3.735020 10.741770 3.311277; 6 8.523627 10.089538 4.836011; 1 9.609577 10.115884 4.877875; 1 8.220075 9.039168 4.712757; 1 8.138581 10.429277 5.806252; 77 6.410236 9.078885 1.860716; 1 11.596683 12.030878 1.290947; 6 11.824437 13.032258 1.668309; 6 11.185746 13.276887 3.006225; 1 11.480189 13.752320 0.919808; 1 12.920201 13.118605 1.729835; 6 10.791178 14.530763 3.542725; 6 11.068962 12.296615 4.071152; 6 10.481111 14.356411 4.953777; 6 10.963500 15.848887 2.846728; 6 10.668208 12.998753 5.282307; 6 11.778932 10.966983 4.034089; 77 8.974688 12.905909 3.491994; 6 10.141508 15.443677 5.932733; 1 10.791178 15.764695 1.769274; 1 11.990547 16.216945 2.986351; 1 10.285400 16.611670 3.233042; 6 10.593402 12.423469 6.667513; 1 11.457272 10.329413 3.203997; 1 11.643134 10.401477 4.959842; 1 12.859216 11.129278 3.913445; 6 7.513924 14.545684 2.541120; 6 6.903346 13.770407 3.585442; 1 10.278450 16.434973 5.491958; 1 10.788039 15.386654 6.817684; 1 9.101846 15.382430 6.276883; 1 10.308582 11.368468 6.661317; 1 9.862095 12.958687 7.281529; 1 11.565640 12.495764 7.178297; 6 7.790035 15.934054 2.852993; 6 7.314843 14.282548 1.060205; 1 6.287496 12.932084 3.301637; 6 6.562155 14.387612 4.854909; 6 7.445112 16.516715 4.042075; 1 8.199261 16.555182 2.058470; 1 8.174191 14.650478 0.487330; 1 6.426622 14.821264 0.694603; 1 7.189631 13.227123 0.838419; 6 5.867653 13.547146 5.895081; 6 6.833404 15.711863 5.063113; 6 7.656606 17.989356 4.298606; 6 6.498733 12.700578 6.192531; 1 4.932791 13.122545 5.505194; 1 5.626214 14.130095 6.790132; 1 6.551874 16.182381 6.004051; 1 8.072269 18.496297 3.421539; 1 8.341732 18.157168 5.140935; 1 6.712457 18.486139 4.558681;                                                                                                                                                                                                                                                                                                                                                                                                                                                                                                                                                                                                                                                                                                                                                                                                                                                                                                                                                                                                                                                                                                                                                                                                                                 |
| 27-9_ts | 6 7.064713 6.944853 2.087764; 6 6.866307 7.209086 0.680717; 6 5.457656 7.434937 0.447239; 6 4.786729 7.366422 1.705035; 6 5.777128 7.101672 2.725323; 6 8.323189 6.427543 2.723859; 1 9.215187 6.836535 2.239459; 1 8.838234 5.330526 2.655441; 1 8.377727 6.693799 3.783430; 6 7.912138 7.053956 -0.386276; 1 7.712823 7.698801 -1.247488; 1 7.948406 6.017496 -0.751058; 1 8.908140 7.305480 -0.010054; 6 4.812759 7.647297 -0.892546; 1 3.913165 8.266379 -0.814426; 1 4.513818 6.691853 -1.347794; 1 5.493445 8.141092 -1.592751; 6 3.308441 7.500517 1.931994; 1 3.089216 7.912565 2.922049; 1 2.803398 6.525912 1.866531; 1 2.843653 8.158731 1.190678; 6 5.480988 6.827397 4.173302; 1 6.341956 7.055396 4.808044; 1 5.223900 5.769659 4.327822; 1 4.638436 7.525919 4.533644; 6 7.830109 10.717169 1.242529; 6 6.440938 11.102011 1.178385; 1 5.948720 11.375369 0.247953; 6 5.711499 11.024801 2.414053; 6 6.529021 10.560524 3.514639; 1 5.974793 10.314689 4.421817; 6 7.990357 10.890388 3.723786; 6 8.676003 11.017043 2.454917; 1 9.651052 10.534390 2.359658; 6 8.586426 10.619725 -0.066066; 1 9.389516 9.875632 -0.008469; 1 9.056864 11.583776 -0.310907; 1 7.929854 10.340844 -0.897442; 6 4.250260 11.777556 2.527784; 1 3.724169 11.197827 1.583387; 1 4.114839 12.436590 2.788884; 1 3.764440 10.780486 3.307673; 6 8.536198 10.037644 4.858449; 1 9.622439 10.060137 4.913028; 1 8.231386 8.989577 4.717439; 1 8.142380 10.363622 5.830455; 77 6.413224 9.082830 1.863381; 1 11.651819 11.981191 1.338769; 6 11.867055 12.990430 1.702057; 6 11.213787 13.249820 3.029937; 1 11.522892 13.695412 0.939284; 1 12.961275 13.088288 1.772803; 6 10.792765 14.504788 3.541417; 6 11.091273 12.280844 4.110333; 6 10.473689 14.347802 4.956834; 6 10.931984 15.817232 2.828553; 6 10.679017 13.002481 5.312304; 6 11.815629 10.958988 4.104512; 77 9.030274 12.845853 3.514327; 6 10.126451 15.460046 5.902652; 1 10.808401 15.706101 1.746690; 1 11.931569 16.242096 3.003022; 1 10.200792 16.551528 3.172929; 6 10.606690 12.433472 6.699385; 1 11.534433 10.322353 3.259401; 1 11.643746 10.390197 5.022108; 1 12.898833 11.131328 4.031631; 6 7.469309 14.640852 2.496716; 6 6.922197 13.813148 3.519809; 1 9.704083 16.318483 5.377097; 1 11.019311 15.811353 6.440524; 1 9.394836 15.144729 6.653594; 1 10.255627 11.398168 6.700823; 1 9.929299 13.013521 7.334068; 1 11.595373 12.443731 7.182519; 6 7.694546 16.019420 2.819006; 6 7.404097 14.321358 1.017603; 1 6.386412 12.925383 3.226444; 6 6.577317 14.376428 4.803860; 6 7.341785 16.562618 4.032976; 1 8.072023 16.672570 2.034669; 1 8.288172 14.709215 0.498938; 1 6.525678 14.808664 0.566570; 1 7.341333 13.253991 0.826178; 6 5.944271 13.486315 5.842475; 6 6.791258 15.712388 5.039180; 6 7.487998 18.040049 4.310093; 1 6.618802 12.662998 6.105168; 1 5.018806 13.031172 5.466285; 1 5.700846 14.042326 6.753835; 1 6.513382 16.143909 5.999258; 1 7.884507 18.576169 3.441898; 1 8.160614 18.227430 5.157913; 1 6.521102 18.489398 4.571656; |
| 7-33_ts | 6 6.860135 6.752854 1.208600; 6 7.123945 7.541697 0.042574; 6 5.907036 8.236744 -0.314482; 6 4.877031 7.838804 0.602920; 6 5.471644 6.967976 1.579134; 6 7.724253 5.677292 1.802169; 1 8.776817 5.801834 1.545685; 1 7.407078 4.692879 1.428568; 1 7.650368 5.649937 2.893160; 6 8.359592 7.531425 -0.812365; 1 8.724787 8.542659 -1.020285; 1 8.144020 7.055504 -1.778989; 1 9.173262 6.973767 -0.346579; 6 5.723311 9.080129 -1.544112; 1 4.933534 9.826110 -1.410815; 1 5.446202 8.460212 -2.408825; 1 6.642620 9.612316 -1.805635; 6 3.430332 8.233805 0.526848; 1 2.954841 8.224207 1.511968; 1 2.869399 7.539236 -0.114000; 1 3.306131 9.236810 0.106161; 6 4.748798 6.230492 2.670618; 1 5.396025 6.065140 3.537398; 1 4.405761 5.245637 2.323293; 1 3.867474 6.780455 3.015105; 6 7.642239 10.907880 1.861563; 6 6.200121 11.046637 2.034525; 1 5.551313 11.580769 1.343689; 6 5.670433 10.315644 3.154384; 6 6.738589 9.557973 3.852277; 1 6.389704 8.870012 4.622776; 6 7.854959 10.471820 4.227632; 6 8.379519 11.156472 3.157324; 77 6.514175 8.965658 1.782192; 1 9.709147 7.800408 1.710230; 6 10.794877 7.692585 1.757051; 6 11.342943 8.418361 2.944317; 1 11.209468 8.085125 0.824044; 1 11.031965 6.618170 1.795983; 6 12.467216 9.269404 2.967545; 6 10.835290 8.291274 4.309236; 6 12.643167 9.754754 4.337172; 6 13.379961 9.587289 1.822051; 6 11.663343 9.060073 5.169790; 6 9.720714 7.371300 4.716868; 77 10.719392 10.574139 3.766130; 6 13.848043 10.490408 4.849263; 1 12.869902 9.504224 0.857336; 1 14.232697 8.893552 1.807568; 1 13.781147 10.600202 1.903218; 6 11.624477 9.096844 6.671105; 1 8.864896 7.457910 4.040459; 1 9.370723 7.589301 5.730426; 1 10.053476 6.322910 4.704777; 6 12.387631 13.108131 2.949721; 6 12.459219 13.809471 4.170346; 1 14.208710 11.224597 4.125018; 1 14.669309 9.790429 5.064381; 1 13.619035 11.031943 5.771326; 1 10.625972 8.872031 7.057709; 1 11.912381 10.080518 7.052178; 1 12.318549 8.358736 7.098621; 6 13.473693 15.237643 2.072573; 1 11.629550 13.722069 4.868021; 6 13.560531 14.592031 4.511684; 6 14.604947 14.008945 2.388786; 1 13.429628 12.742015 1.103601; 6 14.637408 14.677408 3.612074; 1 15.506664 15.280199 3.871432; 1 8.748911 12.166740 3.307410; 6 11.170533 12.303637 2.575448; 1 11.272441 11.967274 1.534740; 1 10.488999 11.723971 4.849818; 1 10.309376 12.984193 2.597569; 6 15.752813 14.118052 1.409171; 1 15.427246 14.556468 0.456778; 1 16.558285 14.745578 1.805040; 1 16.180770 13.134289 1.176489; 6 13.604428 15.345640 5.822965; 1 12.740525 15.104024 6.450890; 1 14.511060 15.108384 6.394151; 1 13.604684 16.432055 5.662342; 6 7.937523 10.843184 5.685288; 1 8.253871 9.989048 6.296170; 1 8.634360 11.662039 5.864465; 1 6.935858 11.130506 6.039446; 6 4.233311 10.359915 3.594537; 1 3.935717 9.415979 4.064237; 1 4.085077 11.157341 4.335540; 1 3.558235 10.557940 2.754468; 6 8.279312 11.416034 0.588466; 1 8.586321 12.467014 0.688777; 1 9.182836 10.843781 0.353770; 1 7.591898 11.342489 -0.261501;   |
| 33      | 6 7.092831 6.631687 1.251198; 6 6.696055 7.306062 0.037935; 6 5.348003 7.783474 0.205817; 6 4.922353 7.450366 1.534051; 6 6.010235 6.779342 2.194802; 6 8.193117 5.613405 1.349807; 1 8.999948 5.810936 0.641426; 1 7.791014                                                                                                                                                                                                                                                                                                                                                                                                                                                                                                                                                                                                                                                                                                                                                                                                                                                                                                                                                                                                                                                                                                                                                                                                                                                                                                                                                                                                                                                                                                                                                                                                                                                                                                                                                                                                                                                                                                                                                                                                                                                                                                                                                                                                                                                                                                                                                                                                                                                                                                                                                                                                                                                                                                                                                                                                              |

|          |                                                                                                                                                                                                                                                                                                                                                                                                                                                                                                                                                                                                                                                                                                                                                                                                                                                                                                                                                                                                                                                                                                                                                                                                                                                                                                                                                                                                                                                                                                                                                                                                                                                                                                                                                                                                                                                                                                                                                                                                                                                                                                                                                                                                                                                                                                                                                                                                                                                                                                                                                                                                                                                                                                                                                                                                                                                                                                                                                                                                                                           |
|----------|-------------------------------------------------------------------------------------------------------------------------------------------------------------------------------------------------------------------------------------------------------------------------------------------------------------------------------------------------------------------------------------------------------------------------------------------------------------------------------------------------------------------------------------------------------------------------------------------------------------------------------------------------------------------------------------------------------------------------------------------------------------------------------------------------------------------------------------------------------------------------------------------------------------------------------------------------------------------------------------------------------------------------------------------------------------------------------------------------------------------------------------------------------------------------------------------------------------------------------------------------------------------------------------------------------------------------------------------------------------------------------------------------------------------------------------------------------------------------------------------------------------------------------------------------------------------------------------------------------------------------------------------------------------------------------------------------------------------------------------------------------------------------------------------------------------------------------------------------------------------------------------------------------------------------------------------------------------------------------------------------------------------------------------------------------------------------------------------------------------------------------------------------------------------------------------------------------------------------------------------------------------------------------------------------------------------------------------------------------------------------------------------------------------------------------------------------------------------------------------------------------------------------------------------------------------------------------------------------------------------------------------------------------------------------------------------------------------------------------------------------------------------------------------------------------------------------------------------------------------------------------------------------------------------------------------------------------------------------------------------------------------------------------------------|
|          | 4.617048 1.112105; 1 8.630593 5.555221 2.348040; 6 7.466338 7.297692 -1.252261; 1 7.195786 8.143979 -1.890305; 1 7.265295 6.379188 -1.821832; 1 8.544944 7.349924 -1.078885; 6 4.507385 8.446608 -0.848521; 1 3.783647 9.143158 -0.413057; 1 3.938894 7.702652 -1.424221; 1 5.120914 9.008584 -1.559036; 6 3.553242 7.677167 2.106310; 1 3.582994 7.794866 3.193712; 1 2.895136 6.823968 1.889263; 1 3.076573 8.569449 1.688949; 6 5.932037 6.123463 3.544824; 1 6.919875 6.018806 4.000291; 1 5.496207 5.117246 3.464378; 1 5.307430 6.696084 4.237503; 6 7.995648 10.651719 1.105547; 6 6.573020 10.954289 1.272979; 1 5.922495 11.281520 0.463879; 6 6.062016 10.675630 2.593523; 6 7.123432 10.149850 3.463412; 1 6.786707 9.752613 4.422233; 6 8.287351 11.132358 3.503171; 6 8.793886 11.344359 2.192556; 77 6.751034 8.900959 1.687748; 1 9.672040 7.967329 1.145646; 6 10.758373 9.922746 1.255937; 6 11.190260 8.568457 2.536452; 1 11.210616 8.415662 0.390376; 1 11.064846 6.867441 1.228372; 6 12.319562 9.419530 2.698557; 6 10.603905 8.339407 3.842155; 6 12.432446 9.753503 4.105794; 6 13.302500 9.813351 1.634563; 6 11.381023 9.047990 4.806644; 6 9.474945 7.410172 4.163287; 77 10.480225 10.680990 3.472046; 6 13.622199 10.392339 4.763721; 1 12.836062 9.858606 0.645807; 1 14.127549 9.088856 1.577739; 1 13.740608 10.792782 1.841994; 6 11.236527 8.969805 6.301137; 1 8.652617 7.541972 3.457144; 1 9.083470 7.599686 5.167164; 1 9.808681 6.362543 4.134296; 6 12.414985 13.211654 3.441906; 6 12.397596 13.647700 4.780784; 1 14.114675 11.113498 4.109318; 1 14.359672 9.622961 5.035344; 1 13.342968 10.925265 5.676131; 1 10.193103 8.843625 6.603125; 1 11.613532 9.874772 6.784571; 1 11.804668 8.117895 6.701364; 6 13.588470 13.430217 2.707123; 1 11.496392 13.490983 5.370067; 6 13.500830 14.262065 5.372189; 6 14.720325 14.040083 3.272134; 1 13.616029 13.136729 1.658609; 6 14.664748 14.444164 4.606609; 1 15.535211 14.916178 5.059914; 1 9.041467 12.357483 1.877770; 6 11.199960 12.610440 2.794772; 1 11.371901 12.512294 1.716589; 1 10.101063 11.602403 4.742845; 6 10.368900 13.310287 2.927638; 6 15.959279 14.277478 2.437120; 1 15.081024 15.081020 1.705495; 1 16.812880 14.565061 3.059940; 1 16.242520 13.381992 1.870744; 6 13.453104 14.734846 6.808477; 1 12.526047 14.423720 7.301078; 1 14.293355 14.337125 7.391425; 1 13.510895 15.829519 6.872129; 6 7.968986 12.293370 4.445413; 1 7.948766 11.962727 5.490858; 1 8.698892 13.101947 4.363341; 1 6.976806 12.709410 4.212083; 6 4.641778 10.939820 3.010983; 1 4.311359 10.219418 3.766940; 1 4.558571 11.941511 3.544496; 1 3.948455 10.894254 2.162923; 6 8.576497 10.708844 -0.290991; 1 8.901276 11.731667 -0.536697; 1 9.455954 10.063343 -0.380471; 1 7.849144 10.396153 -1.048271;                                                                                                                                                                                                                              |
| 33-24_ts | 6 7.093902 6.643469 1.219886; 6 6.719540 7.324438 0.005007; 6 5.367894 7.799001 0.149460; 6 4.913936 7.450251 1.464456; 6 5.989923 6.779469 2.143180; 6 8.194232 5.626999 1.337731; 1 9.010922 5.823383 0.640385; 1 7.797783 4.628563 1.098689; 1 8.618169 5.573275 2.342471; 6 7.515691 7.331697 -1.269395; 1 7.269152 8.194770 -1.895500; 1 7.314857 6.427361 -1.861515; 1 8.591147 7.366623 -1.073328; 6 4.549235 8.470578 -0.916861; 1 3.812967 9.159669 -0.490445; 1 3.996978 7.732048 -1.515256; 1 5.177310 9.043533 -1.605777; 6 3.532788 7.673453 2.008549; 1 3.538013 7.772326 3.098105; 1 2.874744 6.828379 1.761216; 1 3.070914 8.576115 1.596244; 6 5.894353 6.115402 3.488131; 1 6.872164 6.046219 3.972165; 1 5.497977 5.093956 3.394847; 1 5.229970 6.663880 4.163240; 6 7.917127 10.692645 1.102672; 6 6.504813 10.968996 1.357287; 1 5.803143 11.309290 0.597347; 6 6.070377 10.630649 2.692172; 6 7.180712 10.088456 3.484611; 1 6.893199 9.640229 4.437824; 6 8.354375 11.066009 3.515238; 6 8.791162 11.322294 2.166374; 77 6.737707 8.903097 1.679569; 1 9.784187 7.935168 1.100913; 6 10.865455 7.858969 1.241411; 6 11.276902 8.526001 2.517385; 1 11.353596 8.318942 0.376486; 1 11.137272 6.793555 1.245617; 6 12.420406 9.335850 2.710710; 6 10.578408 8.423926 3.796753; 6 12.450177 9.735944 4.112082; 6 13.469933 9.680379 1.693884; 6 11.366065 9.106038 4.797070; 6 9.442407 7.500318 4.110555; 77 10.468301 10.601889 3.309303; 6 13.585292 10.466336 4.772072; 1 13.078313 9.625971 0.673408; 1 14.325738 8.991983 1.754507; 1 13.860447 10.691432 1.846905; 6 11.147030 9.073169 6.282856; 1 8.663927 7.569969 3.349714; 1 8.985023 7.756237 5.070945; 1 9.795064 6.466008 4.178648; 6 12.418967 13.440878 3.457134; 6 12.444273 13.945487 4.768010; 1 14.046126 11.199710 4.107030; 1 14.366441 9.754798 5.076183; 1 13.256463 11.000473 5.667619; 1 10.083299 9.030565 6.533799; 1 11.562371 9.961561 6.767677; 1 11.629130 8.194128 6.736744; 6 13.579695 13.550543 2.682132; 1 11.550336 13.865122 5.384418; 6 13.589347 14.540743 5.300166; 6 14.746979 14.143133 3.185920; 1 13.571102 13.176803 1.659653; 6 14.736799 14.626587 4.496602; 1 15.638215 15.082657 4.902943; 1 9.001121 12.357120 1.878284; 6 11.168187 12.847100 2.878149; 1 11.310269 12.576212 1.832923; 1 10.648584 12.097762 3.977910; 1 10.335993 13.557207 2.923775; 6 15.976850 14.278948 2.316351; 1 15.890794 15.137185 1.663641; 1 16.878830 14.429177 2.918828; 1 16.130135 13.390107 1.693736; 6 13.598617 15.094146 6.707459; 1 12.698168 14.803400 7.257957; 1 14.468676 14.738787 7.272633; 1 13.644802 16.191141 6.704417; 6 8.058918 12.181931 4.519212; 1 8.106996 11.806062 5.549207; 1 8.761963 13.016085 4.442475; 1 7.047362 12.591252 4.367360; 6 4.668038 10.849792 3.189660; 1 4.391651 10.096523 3.935597; 1 4.586851 11.833505 3.672500; 1 3.932692 10.817671 2.377005; 6 8.426699 10.794606 -0.318779; 1 8.726445 11.828102 -0.554034; 1 9.310396 10.163861 -0.463053; 1 7.668921 10.491195 -1.049895; |
| 28       | 77 -0.736220 2.373666 4.964609; 6 -2.519808 2.945504 5.943182; 6 -1.452972 2.665315 6.930943; 6 0.605260 3.634968 3.933090; 6 -0.228620 3.105852 2.837985; 6 -0.047767 1.713143 2.846194; 6 1.004592 1.375730 3.832147; 6 1.488962 2.563322 4.413172; 6 2.636493 2.733132 5.362678; 6 1.522854 -0.014146 4.055730; 6 -0.722480 0.704727 1.964362; 6 -1.110662 3.925878 1.945787; 6 0.776570 5.090623 4.245444; 1 -1.458892 1.698976 7.444835; 6 -0.917669 3.788376 7.690316; 6 -1.343038 5.062972 7.461640; 1 -0.932351 5.887114 8.040423; 6 -2.382012 5.335859 6.498056; 6 -2.964724 4.325045 5.793224; 1 -3.797123 4.530264 5.122657; 1 -1.640017 1.105702 1.524724; 1 -0.989200 -0.199235 2.521776; 1 -0.062847 0.396267 1.140582; 1 -1.875698 3.311013 1.462301; 1 -0.527609 4.415600 1.152159; 1 -1.625496 4.711629 2.507919; 1 -0.165573 5.633163 4.129313; 1 1.518574 5.543083 3.571691; 1 1.116128 5.236804 5.274408; 1 2.880842 1.794405 5.869060; 1 2.409086 3.474180 6.135428; 1 3.541585 3.071601 4.837026; 1 0.708008 -0.744830 4.087424; 1 2.074540 -0.090369 4.996863; 1 2.200274 -0.316685 3.244299; 1 -3.275625 2.175199 5.759964; 1 -2.729501 6.358903 6.373666; 1 -0.185816 3.583989 8.469584;                                                                                                                                                                                                                                                                                                                                                                                                                                                                                                                                                                                                                                                                                                                                                                                                                                                                                                                                                                                                                                                                                                                                                                                                                                                                                                                                                                                                                                                                                                                                                                                                                                                                                                                                                                                                                         |
| 28-29_ts | 6 7.455560 7.139224 1.107581; 6 6.151638 7.186461 0.484183; 6 5.152111 6.838776 1.470401; 6 5.815649 6.635790 2.715700; 6 6.230969 6.857732 2.509933; 6 8.784192 7.208811 0.410681; 1 8.740808 7.855511 -0.470597; 1 9.111304 6.212897 0.076988; 1 9.561087 7.609082 1.068738; 6 5.896834 7.371560 -0.985143; 1 4.923364 7.835244 -1.171896; 1 5.907375 6.404298 -1.506848; 1 6.660045 8.005208 -1.445304; 6 3.681218 6.682471 1.211595; 1 3.087279 6.921128 2.099578; 1 3.436426 5.650718 0.921122; 1 3.343226 7.336345 0.402023; 6 5.170490 6.226909 4.008552; 1 5.728927 6.599513 4.872461; 1 5.122122 5.132286 4.098681; 1 4.146674 6.606497 4.087185; 6 8.306965 6.629012 3.533869; 1 9.195158 7.229831 3.318919; 1 8.614261 5.573986 3.549224; 1 7.967270 6.887018 4.541754; 6 6.085800 10.743658 0.939671; 6 5.223776 10.672455 2.119668; 1 4.139815 10.707155 2.076065; 6 5.942574 10.470429 3.334745; 6 7.384827 10.372485 3.128683; 1 7.976494 10.037900 3.974683; 6 8.002713 11.372611 2.214159; 6 7.328755 11.536377 1.055802; 1 7.610834 12.235878 0.275066; 77 6.327163 8.837944 1.994484; 1 12.758802 12.438736                                                                                                                                                                                                                                                                                                                                                                                                                                                                                                                                                                                                                                                                                                                                                                                                                                                                                                                                                                                                                                                                                                                                                                                                                                                                                                                                                                                                                                                                                                                                                                                                                                                                                                                                                                                                                                                                                                            |

|          |                                                                                                                                                                                                                                                                                                                                                                                                                                                                                                                                                                                                                                                                                                                                                                                                                                                                                                                                                                                                                                                                                                                                                                                                                                                                                                                                                                                                                                                                                                                                                                                                                                                                                                                                                                                                                                                                                                                                                                                                                                                                                                                                                                                                                                                                                                                                                                                                                                                        |
|----------|--------------------------------------------------------------------------------------------------------------------------------------------------------------------------------------------------------------------------------------------------------------------------------------------------------------------------------------------------------------------------------------------------------------------------------------------------------------------------------------------------------------------------------------------------------------------------------------------------------------------------------------------------------------------------------------------------------------------------------------------------------------------------------------------------------------------------------------------------------------------------------------------------------------------------------------------------------------------------------------------------------------------------------------------------------------------------------------------------------------------------------------------------------------------------------------------------------------------------------------------------------------------------------------------------------------------------------------------------------------------------------------------------------------------------------------------------------------------------------------------------------------------------------------------------------------------------------------------------------------------------------------------------------------------------------------------------------------------------------------------------------------------------------------------------------------------------------------------------------------------------------------------------------------------------------------------------------------------------------------------------------------------------------------------------------------------------------------------------------------------------------------------------------------------------------------------------------------------------------------------------------------------------------------------------------------------------------------------------------------------------------------------------------------------------------------------------------|
|          | 3.851032; 6 12.471948 13.424032 4.231202; 6 11.038307 13.449529 4.673739; 1 12.654813 14.151091 3.434079; 1 13.149556 13.668045 5.063546; 6 10.206753 14.641216 4.797354; 6 10.246902 12.355812 5.117672; 6 8.975679 14.267400 5.509858; 6 10.716397 16.046505 4.677557; 6 8.988718 12.873506 5.680449; 6 10.705547 10.928768 5.230029; 77 9.198794 13.386428 3.341915; 6 7.934566 15.242080 5.972440; 1 11.420268 16.150686 3.848596; 1 11.234311 16.337237 5.603517; 1 9.904983 16.756965 4.506050; 6 7.965170 12.049122 6.405023; 1 11.462886 10.690128 4.477320; 1 9.880084 10.221579 5.104927; 1 11.147486 10.735865 6.218499; 6 9.407359 14.200458 1.361961; 6 8.103437 14.594400 1.921205; 1 7.749847 16.009657 5.213834; 1 8.255263 15.756954 6.889933; 1 6.982189 14.747229 6.185356; 1 7.819154 11.072104 5.936096; 1 6.992422 12.549104 6.432480; 1 8.273132 11.865597 7.445019; 6 10.382252 15.250456 1.101686; 1 7.210474 14.047483 1.629634; 6 7.892775 16.005328 2.207995; 6 10.128143 16.552663 1.410385; 1 11.314339 14.977393 0.609236; 6 8.860361 16.937893 1.980068; 1 8.670399 17.989371 2.184766; 1 6.911483 16.315463 2.564425; 1 9.450263 13.366371 0.660101; 1 10.866547 17.322109 1.195424; 1 5.585914 10.732249 -0.026318; 1 9.078588 11.701686 2.348398; 1 5.448867 10.337877 4.292320;                                                                                                                                                                                                                                                                                                                                                                                                                                                                                                                                                                                                                                                                                                                                                                                                                                                                                                                                                                                                                                                                                                                                    |
| 29       | 6 7.223438 7.048683 1.880647; 6 6.830863 7.430005 0.541339; 6 5.391496 7.569431 0.503365; 6 4.892366 7.341322 1.820817; 6 6.019754 7.056792 2.682072; 6 8.582465 6.577396 2.312682; 1 9.377254 7.076413 1.750062; 1 8.697545 5.493762 2.158206; 1 8.758178 6.778987 3.373661; 6 7.741472 7.470433 -0.653656; 1 7.394340 8.189796 -1.401794; 1 7.793814 6.486335 -1.140812; 1 8.758945 7.754130 -0.369798; 6 4.569555 7.855970 -0.720438; 1 3.650753 8.397237 -0.472966; 1 4.275050 6.926178 -1.228471; 1 5.123933 8.459948 -1.445107; 6 3.449509 7.345659 2.237407; 1 3.333785 7.650438 3.281919; 1 3.003108 6.345596 2.137854; 1 2.854305 8.030947 1.625446; 6 5.930354 6.638214 4.122769; 1 6.848227 6.880230 4.666129; 1 5.769269 5.554026 4.206987; 1 5.101452 7.134674 4.636618; 6 7.662716 10.871645 1.305152; 6 6.268121 11.215006 1.459062; 1 5.635769 11.547018 0.641197; 6 5.750967 10.987583 2.776884; 6 6.719518 10.456644 3.707658; 1 6.321388 10.107224 4.659138; 6 8.153347 10.895312 3.708904; 6 8.673428 11.124769 2.383296; 1 9.658613 10.740439 2.121898; 77 6.431241 9.135005 1.944080; 1 11.770732 12.054060 1.536965; 6 12.027222 13.016897 1.989944; 6 11.283054 13.238129 3.275944; 1 11.800378 13.794638 1.254878; 1 13.114944 13.021384 2.153668; 6 10.125581 4.851132; 6 10.987299 12.211443 4.265084; 6 10.329264 14.250798 5.146756; 6 11.040787 15.834524 3.199541; 6 10.432681 12.865725 5.441454; 6 11.535223 10.811006 4.239158; 77 8.995182 12.884611 3.599393; 6 9.908956 15.337850 6.088406; 1 11.296530 15.765544 2.138157; 1 11.853412 16.378403 3.701992; 1 10.134887 16.443395 3.281994; 6 10.155260 12.198372 6.758394; 1 11.572815 10.402496 3.224859; 1 10.941315 10.125581 4.851132; 1 12.560450 10.794307 4.634384; 6 7.479304 14.030321 2.415617; 6 6.957123 13.800843 3.747116; 1 9.223704 16.044544 5.609678; 1 10.782320 15.907073 6.437498; 1 9.403750 14.934510 6.970862; 1 9.780372 11.179062 6.622379; 1 9.406658 12.747106 7.337308; 1 11.066416 12.132194 7.371082; 6 7.779797 15.389976 2.025368; 1 6.301618 12.958847 3.928383; 6 6.765654 14.944139 4.611691; 6 7.591363 16.438672 2.881431; 1 8.113471 15.572010 1.005577; 6 7.073568 16.211121 4.201637; 1 6.885331 17.060663 4.854263; 1 6.316227 14.781709 5.589486; 1 7.209860 13.358701 1.610745; 1 7.787459 17.457177 2.553891; 1 8.039430 10.862502 0.283429; 1 8.752955 10.339844 4.429030; 1 4.702666 11.136050 3.017918;          |
| 29-30_ts | 6 7.131324 6.972771 1.822351; 6 6.735664 7.431219 0.508235; 6 5.305952 7.650267 0.507028; 6 4.820167 7.393054 1.823943; 6 5.945478 7.009514 2.648534; 6 8.472136 6.417177 2.208905; 1 9.279980 6.890444 1.642633; 1 8.526382 5.333922 2.021357; 1 8.681265 6.579099 3.270680; 6 7.625590 7.473729 -0.702226; 1 7.298622 8.235395 -1.416943; 1 7.624766 6.507145 -1.226133; 1 8.659698 7.701291 -0.427863; 6 4.477298 8.037761 -0.684041; 1 3.601750 8.626653 -0.392077; 1 4.111185 7.150895 -1.221613; 1 5.053493 8.634706 -1.397526; 6 3.387641 7.459071 2.270197; 1 3.308595 7.719303 3.330131; 1 2.881669 6.492235 2.133068; 1 2.822271 8.206134 1.703740; 6 5.861598 6.533886 4.071745; 1 6.800858 6.706853 4.604907; 1 5.647340 5.456360 4.114751; 1 5.069091 7.048918 4.623529; 6 7.801222 10.772033 1.409362; 6 6.434931 11.195521 1.604895; 1 5.810897 11.609878 0.818559; 6 5.927916 10.941416 2.925288; 6 6.881271 10.308838 3.807386; 1 6.478732 9.937010 4.748884; 6 8.344024 10.662456 3.807726; 6 8.858682 10.914821 2.471274; 1 9.803253 10.456921 2.170909; 77 6.461536 9.095772 1.991579; 1 12.037908 12.011087 1.686067; 6 12.203771 13.006322 2.109806; 6 11.414444 13.206742 3.370576; 1 11.932309 13.739014 1.344101; 1 13.282948 13.107104 2.298817; 6 10.835630 14.405884 3.841289; 6 11.180140 12.179129 4.396815; 6 10.319489 14.181272 5.192864; 6 10.851050 15.738681 3.152306; 6 10.570918 12.842721 5.561596; 6 11.850473 10.834088 4.433163; 77 9.231380 12.595246 3.709256; 6 9.752603 15.258519 6.070195; 1 11.039096 15.633931 2.079758; 1 11.639796 16.385163 3.564838; 1 9.900491 16.267255 3.268393; 6 10.358527 12.207731 6.904824; 1 11.929327 10.395051 3.433984; 1 11.302812 10.127721 5.064319; 1 12.868734 10.919689 4.838651; 6 7.362743 14.393633 2.094657; 6 6.984460 14.011723 3.392339; 1 9.087582 15.925702 5.514295; 1 10.555760 15.877296 6.496765; 1 9.182002 14.840363 6.905017; 1 10.049788 11.162170 6.809578; 1 9.585578 12.727608 7.478623; 1 11.282873 12.224847 7.501487; 6 7.457837 15.754704 1.770356; 1 6.789145 12.966951 3.623307; 6 6.678533 14.994501 4.349402; 6 7.145568 16.722790 2.722369; 1 7.755138 16.053037 0.768440; 6 6.748092 16.343223 4.014569; 1 6.487244 17.102873 4.747000; 1 6.374461 14.691536 5.347573; 1 7.532724 13.636602 1.338688; 1 7.194600 17.776996 2.460605; 1 8.155293 10.780130 0.378963; 1 8.918250 10.028415 4.485373; 1 4.897183 11.149853 3.197008; |
| 28-31_ts | 6 6.645640 6.704095 1.334910; 6 5.864268 6.910559 0.131232; 6 4.739204 7.725107 0.467738; 6 4.841212 8.064790 1.865362; 6 5.993000 7.377684 2.424401; 6 7.833289 5.791571 1.452213; 1 8.452658 5.816059 0.550313; 1 7.508353 4.752215 1.601301; 1 8.466150 6.067333 2.299493; 6 6.149013 6.296455 -1.209398; 1 5.759952 6.911489 -2.027089; 1 5.686065 5.303117 -1.296654; 1 7.223592 6.169705 -1.372107; 6 3.638204 8.143190 -0.463739; 1 3.203293 9.102808 -0.168396; 1 2.824567 7.403956 -0.469886; 1 3.995151 8.243518 -1.493737; 6 3.818125 8.824498 2.661419; 1 4.276886 9.333550 3.513930; 1 3.045051 8.149766 3.055017; 1 3.315201 9.582908 2.053277; 6 6.304278 7.229668 3.885175; 1 7.368253 7.060384 4.063085; 1 5.752203 6.379053 4.311742; 1 6.019167 8.121636 4.450083; 6 8.755389 9.543183 0.456684; 6 7.772622 10.127364 -0.454464; 1 7.731789 9.925072 -1.520573; 6 6.794336 10.924896 0.214789; 6 6.993643 10.974062 1.667014; 1 6.193344 11.425867 2.249239; 6 8.392909 11.222911 2.108668; 6 9.316970 10.478558 1.470981; 77 6.703693 8.927051 0.955251; 1 10.273556 13.195070 6.388435; 6 11.059068 12.492987 6.684699; 6 11.707166 11.853960 5.492796; 1 10.601726 11.743389 7.338140; 1 11.792878 13.051010 7.285478; 6 12.440636 10.580383 5.501181; 6 11.751102 12.328912 4.165029; 6 13.122910 10.433554 4.200937; 6 12.796679 9.807372 6.734909; 6 12.648000 11.464845 3.373047; 6 11.120310 13.584390 3.632550; 77 10.829868 10.192113 4.184613; 6 14.131378 9.373160 3.875095; 1 11.977960 9.814084 7.458758; 1 13.684842 10.243394 7.215521; 1 13.013919 8.762297 6.499722; 6 13.042420 11.739531 1.950918; 1 10.323837 13.941309 4.295834; 1 10.685342 13.431966 2.642454; 1 11.862070 14.390958 3.544712; 6 9.214965 9.057443 4.960537; 6 9.190280                                                                                                                                                                                                                                                                                                                                                                                                                                                                                                                                                                                                                                                                     |

|          |                                                                                                                                                                                                                                                                                                                                                                                                                                                                                                                                                                                                                                                                                                                                                                                                                                                                                                                                                                                                                                                                                                                                                                                                                                                                                                                                                                                                                                                                                                                                                                                                                                                                                                                                                                                                                                                                                                                                                                                                                                                                                                                                                                                                                                                                                                                                                                                                                                                    |
|----------|----------------------------------------------------------------------------------------------------------------------------------------------------------------------------------------------------------------------------------------------------------------------------------------------------------------------------------------------------------------------------------------------------------------------------------------------------------------------------------------------------------------------------------------------------------------------------------------------------------------------------------------------------------------------------------------------------------------------------------------------------------------------------------------------------------------------------------------------------------------------------------------------------------------------------------------------------------------------------------------------------------------------------------------------------------------------------------------------------------------------------------------------------------------------------------------------------------------------------------------------------------------------------------------------------------------------------------------------------------------------------------------------------------------------------------------------------------------------------------------------------------------------------------------------------------------------------------------------------------------------------------------------------------------------------------------------------------------------------------------------------------------------------------------------------------------------------------------------------------------------------------------------------------------------------------------------------------------------------------------------------------------------------------------------------------------------------------------------------------------------------------------------------------------------------------------------------------------------------------------------------------------------------------------------------------------------------------------------------------------------------------------------------------------------------------------------------|
|          | 8.743205 6.382957; 1 13.835303 8.404742 4.291095; 1 15.118797 9.623111 4.290578; 1 14.249480 9.247849 2.794363; 1 12.192933 12.084573 1.351455; 1 13.450973 10.847886 1.465900; 1 13.809283 12.526062 1.898983; 6 10.057861 8.213325 4.085475; 1 8.514419 9.305622 7.025743; 6 9.955849 7.743639 6.905278; 6 10.812398 7.132169 4.704526; 1 9.720101 8.038456 3.062273; 6 10.783840 6.925081 6.051925; 1 11.352872 6.109889 6.493760; 1 10.390108 10.624232 1.557406; 1 8.291393 9.462571 4.545851; 1 5.959463 11.386632 -0.303574; 1 8.627036 12.028572 2.798012; 1 9.422898 8.794165 0.036293; 1 9.919378 7.524850 7.970358; 1 11.381431 6.462326 4.061101;                                                                                                                                                                                                                                                                                                                                                                                                                                                                                                                                                                                                                                                                                                                                                                                                                                                                                                                                                                                                                                                                                                                                                                                                                                                                                                                                                                                                                                                                                                                                                                                                                                                                                                                                                                                      |
| 31       | 6 6.708009 6.847727 2.067917; 6 6.401480 7.075864 0.668976; 6 5.160131 7.803255 0.592631; 6 4.731989 8.089560 1.932503; 6 5.692399 7.507020 2.841474; 6 7.727088 5.877247 2.588371; 1 8.612621 5.832008 1.949326; 1 7.296389 4.865423 2.624951; 1 8.065773 6.131272 3.594813; 6 7.146915 6.477049 -0.490342; 1 7.025808 7.074441 -1.399370; 1 6.787796 5.461906 -0.711697; 1 8.218597 6.408996 -0.280979; 6 4.419653 8.160459 -0.664449; 1 3.860498 9.095094 -0.553563; 1 3.697192 7.376444 -0.932243; 1 5.100553 8.280120 -1.512544; 6 3.457049 8.778625 2.328400; 1 3.565308 9.307439 3.280345; 1 2.636550 8.056423 2.446908; 1 3.142090 9.510063 1.577355; 6 5.549226 7.450344 4.336012; 1 6.516605 7.316092 4.826570; 1 4.906539 6.609022 4.632119; 1 5.096876 8.364244 4.733487; 6 8.607906 10.023876 0.801441; 6 7.389478 10.730343 0.409806; 1 7.029109 10.828531 -0.610543; 6 6.635707 11.204932 1.540161; 6 7.261028 10.872480 2.817025; 1 6.650465 11.028571 3.706152; 6 8.709274 11.287060 2.890448; 6 9.464688 10.814660 1.761971; 77 6.786387 9.094758 1.608706; 1 9.706825 13.160354 5.532960; 6 10.552627 12.679222 6.034060; 6 11.351942 11.834676 5.083037; 1 10.147268 12.082440 6.856308; 1 11.168666 13.476990 6.474788; 6 12.052909 10.635294 5.384671; 6 11.642603 12.164318 3.697189; 6 12.832017 10.248049 4.219162; 6 12.149455 9.968609 6.723593; 6 12.605072 11.197801 3.190879; 6 11.316091 13.472845 3.032073; 77 10.477745 10.278223 3.580101; 6 13.819775 9.121363 4.199888; 1 11.371474 10.321924 7.406601; 1 13.122148 10.178659 7.190841; 1 12.047111 8.881985 6.643556; 6 13.297508 11.281969 1.860892; 1 10.405801 13.921980 3.439838; 1 11.175854 13.363262 1.951993; 1 12.131026 14.194120 3.184107; 6 9.233356 8.585273 4.285473; 6 9.499541 7.997756 5.580958; 1 13.390469 8.202921 4.612528; 1 14.706062 9.372341 4.799926; 1 14.160390 8.900282 3.183990; 1 12.620629 11.633815 1.075429; 1 13.687085 10.309230 1.546709; 1 14.144717 11.982602 1.897257; 6 10.037928 8.152459 3.157683; 1 8.858540 8.273670 6.416707; 6 10.486722 7.067960 5.755615; 6 11.069535 7.165431 3.395835; 1 9.589883 8.157861 2.171453; 6 11.290598 6.646249 4.640777; 1 12.045159 5.876936 4.789641; 1 10.140478 11.493917 1.235418; 1 8.218338 8.913685 4.098359; 1 5.663966 11.678823 1.431002; 1 8.814767 12.323264 3.219025; 1 9.119519 9.477928 0.008995; 1 10.645889 6.610906 6.729813; 1 11.639533 6.796425 2.544823; |
| 31-32_ts | 6 6.973563 6.779659 1.378601; 6 6.254467 7.299811 0.234417; 6 5.040447 7.906200 0.710539; 6 5.033261 7.816421 2.145296; 6 6.215993 7.088896 2.555877; 6 8.189662 5.902338 1.300595; 1 8.876622 6.234407 0.515872; 1 7.903865 4.865603 1.070345; 1 8.740852 5.891975 2.243085; 6 6.639694 7.092722 -1.203076; 1 6.234661 7.879459 -1.847368; 1 6.263084 6.131516 -1.581501; 1 7.726707 7.090339 -1.329308; 6 3.953821 8.494439 -0.143656; 1 3.420960 9.296086 0.377153; 1 3.211493 7.731675 -0.418300; 1 4.352522 8.911501 -1.073771; 6 3.912893 8.233789 3.055354; 1 4.287083 8.521993 4.042452; 1 3.193440 7.415333 3.203023; 1 3.359674 9.086759 2.649941; 6 6.449508 6.551712 3.937610; 1 7.492267 6.275535 4.101469; 1 5.836202 5.652792 4.098920; 1 6.176143 7.276328 4.709998; 6 8.592868 10.155112 0.755683; 6 7.326441 10.787195 0.399206; 1 6.942457 10.885322 -0.613082; 6 6.550572 11.168577 1.551991; 6 7.213691 10.850804 2.811041; 1 6.597608 10.936679 3.706376; 6 8.633541 11.376757 2.888822; 6 9.411530 10.963591 1.734245; 77 6.845149 9.074789 1.534666; 1 9.922442 13.434692 5.345550; 6 10.753073 12.954416 5.873088; 6 11.454073 11.954129 5.001050; 1 10.344929 12.487917 6.774610; 1 11.440323 13.751324 6.194195; 6 11.999057 10.712074 5.380491; 6 11.752345 12.145014 3.576200; 6 12.708795 10.141218 4.230132; 6 11.994962 10.110396 6.754450; 6 12.626272 11.044682 3.147805; 6 11.583242 13.445572 2.840898; 77 10.436671 10.471782 3.517761; 6 13.542037 8.893974 4.289490; 1 11.217989 10.551879 7.385643; 1 12.960377 10.273203 7.256227; 1 11.819673 9.031328 6.725811; 6 13.348332 10.966633 1.834094; 1 10.634909 13.931563 3.091096; 1 11.606776 13.303971 1.756407; 1 12.391984 14.143778 3.099600; 6 9.533844 8.191323 3.933950; 6 8.907645 8.537703 5.144871; 1 13.041957 8.098578 4.849697; 1 14.503378 9.089987 4.786896; 1 13.762419 8.508507 3.289366; 1 12.738758 11.362372 1.015871; 1 13.608118 9.934773 1.579556; 1 14.282300 11.548082 1.859266; 6 10.484403 7.153676 3.914967; 1 8.120196 9.281700 5.137092; 6 9.251628 7.868302 6.327957; 6 10.800700 6.468722 5.085546; 1 10.963250 6.888897 2.976584; 6 10.184717 6.832822 6.294226; 1 10.429711 6.294746 7.206976; 1 10.016777 11.708213 1.207768; 1 9.128994 8.581572 2.991866; 1 5.545415 11.572710 1.462189; 1 8.646019 12.428902 3.195757; 1 9.130476 9.665648 -0.056259; 1 8.775772 8.140807 7.266371; 1 11.518507 5.652710 5.066571;  |
| 34       | 77 -0.042052 1.687101 5.466097; 6 -2.361237 2.687411 7.180970; 6 -1.325489 3.041831 6.280847; 6 1.881162 2.730834 4.697791; 6 1.091670 2.430215 3.576764; 6 0.859606 0.970780 3.564819; 6 1.609769 0.374618 4.620227; 6 2.111326 1.465606 5.421482; 6 2.971320 1.335672 6.641951; 6 1.787212 -1.090114 4.893894; 6 0.110914 0.249299 2.485217; 6 0.584993 3.373393 2.527248; 6 2.426652 4.062475 5.117937; 1 -0.830215 0.566770 6.315997; 6 -1.245018 4.417252 5.941452; 6 -2.127557 5.366061 6.452521; 1 -2.033318 6.410890 6.164042; 6 -3.136751 4.974283 7.338837; 6 -3.249986 3.631716 7.701060; 1 -4.031707 3.318952 8.389870; 1 -0.784298 0.802338 2.185614; 1 -0.204726 -0.744034 2.814208; 1 0.741744 0.125938 1.593288; 1 -0.451347 3.148857 2.256354; 1 1.188909 3.298048 1.612173; 1 0.621315 4.412698 2.864592; 1 1.922015 4.886932 4.606911; 1 3.497999 4.133899 4.884051; 1 2.312586 4.220097 6.194883; 1 2.735621 0.425047 7.198700; 1 2.833504 2.185869 7.315987; 1 4.033669 1.296467 6.360975; 1 0.944612 -1.673580 4.512318; 1 1.862692 -1.289577 5.966554; 1 2.701417 -1.471420 4.417618; 1 -2.467696 1.648879 7.476963; 1 -0.470118 4.748611 5.254293; 1 -3.827046 5.711762 7.741832;                                                                                                                                                                                                                                                                                                                                                                                                                                                                                                                                                                                                                                                                                                                                                                                                                                                                                                                                                                                                                                                                                                                                                                                                                                          |
| 34-35_ts | 77 0.260814 1.482834 3.180134; 6 -1.032526 -0.398957 2.811443; 6 0.290544 -0.641339 2.385087; 6 0.610867 0.395534 1.400721; 6 -0.637207 1.106810 1.067615; 6 -1.614382 0.668455 1.974081; 6 -3.042706 1.118563 2.063269; 6 -0.782228 2.100484 -0.045774; 6 1.868915 0.457980 0.586801; 6 1.220734 -1.722495 2.851056; 6 -1.802108 -1.169931 3.842683; 1 2.736990 0.151122 1.176254; 1 2.054266 1.471994 0.222177; 1 1.797069 -0.209012 -0.284919; 1 2.257120 -1.374128 2.869892; 1 1.172629 -2.594046 2.182962; 1 0.970097 -2.060984 3.860330; 1 -1.133641 -1.696695 4.528737; 1 -2.451559 -1.918442 3.366464; 1 -2.442497 -0.513458 4.439911; 1 -3.196316 2.081438 1.568545; 1 -3.366955 1.222809 3.103601; 1 -3.711755 0.388322 1.586528; 1 0.061607 2.796318 -0.075403; 1 -1.695983 2.692794 0.055066; 1 -0.826013 1.587987 -1.016925; 6 0.998951 6.306039 3.484919; 6 -0.093010 5.783757 2.786374; 1 -0.811210 6.454403 2.318598; 6 -0.258849 4.402095 2.680869; 6 0.633722 3.481301 3.283696; 6 1.724075 4.048878 3.985917; 6 1.909262 5.430282 4.080662; 1 2.765827 5.824631 4.623893; 1 1.464256 1.331119 4.230730; 77 -1.789851 3.991820 8.738380; 6 -3.808761 4.093052 9.669092; 6 -3.443273 5.421908 9.228014; 6 -2.855934 3.723763 10.693083; 6 -5.026532 3.316099 9.258492; 6 -2.348405 5.896438 10.046021; 6 -4.202235                                                                                                                                                                                                                                                                                                                                                                                                                                                                                                                                                                                                                                                                                                                                                                                                                                                                                                                                                                                                                                                                                                                |

|          |                                                                                                                                                                                                                                                                                                                                                                                                                                                                                                                                                                                                                                                                                                                                                                                                                                                                                                                                                                                                                                                                                                                                                                                                                                                                                                                                                                                                                                                                                                                                                                                                                                                                                                                                                                                                                                                                                                                                                                                                                                                                                                                                                                                                                                                                                                                                                                                                                                                               |
|----------|---------------------------------------------------------------------------------------------------------------------------------------------------------------------------------------------------------------------------------------------------------------------------------------------------------------------------------------------------------------------------------------------------------------------------------------------------------------------------------------------------------------------------------------------------------------------------------------------------------------------------------------------------------------------------------------------------------------------------------------------------------------------------------------------------------------------------------------------------------------------------------------------------------------------------------------------------------------------------------------------------------------------------------------------------------------------------------------------------------------------------------------------------------------------------------------------------------------------------------------------------------------------------------------------------------------------------------------------------------------------------------------------------------------------------------------------------------------------------------------------------------------------------------------------------------------------------------------------------------------------------------------------------------------------------------------------------------------------------------------------------------------------------------------------------------------------------------------------------------------------------------------------------------------------------------------------------------------------------------------------------------------------------------------------------------------------------------------------------------------------------------------------------------------------------------------------------------------------------------------------------------------------------------------------------------------------------------------------------------------------------------------------------------------------------------------------------------------|
|          | 6.247762 8.227608; 6 -1.987183 4.852247 10.946635; 6 -2.893990 2.456272 11.499759; 1 -5.309130 3.533179 8.224057; 1 -5.889569 3.557849 9.896991; 1 -4.854786 2.237794 9.328134; 6 -1.727824 7.262108 9.974550; 1 -3.544618 6.944289 7.698424; 1 -4.984469 6.841164 8.721745; 1 -4.687679 5.617461 7.477203; 6 -0.915737 4.916542 11.996843; 1 -3.298101 1.624593 10.915722; 1 -3.527257 2.577496 12.390062; 1 -1.896240 2.165664 11.842981; 1 -0.671453 7.241016 10.261050; 1 -2.236283 7.966572 10.648547; 1 -1.787545 7.678265 8.964405; 1 -0.492262 3.928201 12.199742; 1 -1.311199 5.303408 12.947134; 1 -0.093138 5.572542 11.694380; 6 -0.283342 4.203724 7.223045; 6 -1.563729 3.958843 6.565063; 6 0.091004 3.165181 8.125732; 6 -1.803169 2.584422 6.053104; 1 -1.976738 4.787349 5.994766; 6 -0.885671 2.078457 8.190594; 1 0.980856 3.219232 8.745242; 1 -1.447135 1.603226 6.899398; 1 -1.475317 0.543770 6.657585; 1 0.299729 5.108701 7.090865; 1 -0.739097 1.343068 8.979129; 1 -2.163082 2.423392 5.040251; 1 2.439797 3.389956 4.467409; 1 -1.116776 4.025749 2.128181; 1 1.139299 7.381887 3.560386;                                                                                                                                                                                                                                                                                                                                                                                                                                                                                                                                                                                                                                                                                                                                                                                                                                                                                                                                                                                                                                                                                                                                                                                                                                                                                                                                        |
| 35       | 77 -1.159711 2.332675 4.314185; 6 -1.782084 0.107589 3.732162; 6 -0.409221 0.343431 3.407179; 6 -0.367624 1.396831 2.415662; 6 -1.741235 1.741039 2.083087; 6 -2.604260 0.968241 2.906178; 6 -4.106233 0.958158 2.883904; 6 -2.144150 2.677183 0.982133; 6 0.843980 1.853684 1.652923; 6 0.770798 -0.439675 3.911137; 6 -2.307341 -0.955073 4.653790; 1 1.759663 1.696212 2.230383; 1 0.786350 2.920215 1.416887; 1 0.948683 1.303427 0.706919; 1 1.679141 0.168680 3.919078; 1 0.961216 -1.313977 3.272670; 1 0.609724 -0.802887 4.930356; 1 -1.564432 -1.245021 5.402658; 1 -2.580410 -1.860377 4.093590; 1 -3.206638 -0.625507 5.186221; 1 -4.508744 1.865197 2.424233; 1 -4.526306 0.885042 3.893532; 1 -4.490492 0.101200 2.312765; 1 -1.512911 3.569374 0.962182; 1 -3.180074 3.010917 1.090318; 1 -2.056421 2.179569 0.006103; 6 -0.388171 6.969018 2.839933; 6 -1.675567 6.429266 2.864388; 1 -2.521884 7.022463 2.522568; 6 -1.888032 5.128751 3.330889; 6 -0.832439 4.311880 3.785125; 6 0.455284 4.883101 3.748304; 6 0.676547 6.184760 3.285420; 1 1.688797 6.584811 3.275825; 1 0.157695 2.629795 5.130584; 77 -2.259885 4.083822 8.641112; 6 -4.016574 3.572028 9.910189; 6 -4.033830 4.998276 9.667265; 6 -2.815021 3.295926 10.669081; 6 -5.116017 2.599109 9.592910; 6 -2.905914 5.595682 10.345554; 6 -5.144070 5.753047 8.991706; 6 -2.157135 4.548224 10.963588; 6 -2.426817 1.954630 11.224722; 1 -5.644955 2.877702 8.676488; 1 -5.858346 2.556212 10.404320; 1 -4.726159 1.586798 9.449643; 6 -2.607940 7.065517 10.426688; 1 -4.776987 6.661906 8.505137; 1 -5.912083 6.054056 9.718343; 1 -5.632612 5.143128 8.226486; 6 -0.927926 4.718338 11.809640; 1 -2.759892 1.142068 10.572684; 1 -2.877992 1.793965 12.214205; 1 -1.342248 1.863422 11.338820; 1 -1.533707 7.255812 10.516453; 1 -3.095768 7.522154 11.300071; 1 -2.964494 7.597866 9.539858; 1 -0.281680 3.836673 11.762669; 1 -1.190631 4.874531 12.865979; 1 -0.334098 5.580709 11.490268; 6 -1.166730 4.872587 6.958882; 6 -2.461409 4.453447 6.474762; 6 -0.411571 3.828056 7.573233; 6 -2.615584 3.135853 5.775207; 1 -3.131691 5.248934 6.159392; 6 -1.087257 2.549685 7.587243; 1 0.550643 4.006613 8.042932; 6 -1.865963 2.098364 6.388874; 1 -2.262691 1.087257 6.449415; 1 1.307214 4.301337 4.089876; 1 -0.218956 7.981487 2.481461; 1 -2.904922 4.743036 3.344358; 1 -0.625479 1.764418 8.182861; 1 -0.820183 5.900018 6.930703; 1 -3.603060 2.937024 5.361201; |
| 35-30_ts | 77 -0.951956 2.393352 4.285780; 6 -2.050932 0.589315 3.599223; 6 -0.655382 0.180238 3.687143; 6 0.063767 0.912288 2.703762; 6 -0.890575 1.712927 1.945959; 6 -2.188874 1.483120 2.460528; 6 -3.488884 2.016861 1.932050; 6 -0.531482 2.570477 0.767983; 6 1.514067 0.736281 2.350859; 6 -0.107898 -0.895657 4.580500; 6 -3.202072 -0.077011 4.301914; 1 2.120301 0.501144 3.231454; 1 1.929376 1.637023 1.890489; 1 1.647647 -0.085009 1.631291; 1 0.958800 -0.749988 4.774967; 1 -0.230080 -1.888245 4.122368; 1 -0.618293 -0.918102 5.548236; 1 -2.899104 -0.508782 5.260362; 1 -3.610539 -0.894889 3.692029; 1 -4.020047 0.623911 4.498735; 1 -3.345497 2.937376 1.358743; 1 -4.190338 2.240476 2.742477; 1 -3.978869 1.287873 1.269930; 1 0.338966 3.200062 0.979834; 1 -1.354930 3.232685 0.486830; 1 -0.288106 1.951667 -0.106871; 6 1.137647 6.525879 2.525582; 6 -0.151090 6.555808 3.065546; 1 -0.762401 7.449394 2.959310; 6 -0.671992 5.447434 3.733835; 6 0.073302 4.255601 3.860278; 6 1.383530 4.257663 3.332789; 6 1.905514 5.369525 2.669082; 1 2.918342 5.332465 2.274309; 1 0.162833 3.454683 4.965512; 77 -2.048306 4.135049 8.598521; 6 -3.773260 3.491630 9.853896; 6 -3.877305 4.919529 9.642649; 6 -2.557741 3.270874 10.607320; 6 -4.812236 2.461852 9.512861; 6 -2.787031 5.568510 10.333860; 6 -5.032212 5.618921 8.982578; 6 -1.974589 4.554113 10.926983; 6 -2.089258 1.943812 11.134536; 1 -5.356305 2.728048 8.601628; 1 -5.551344 2.357265 10.321634; 1 -4.362797 1.477852 9.348544; 6 -2.576907 7.051182 10.448886; 1 -4.724332 6.565438 8.527547; 1 -5.823526 5.844833 9.711517; 1 -5.473708 5.001860 8.194734; 6 -0.758071 4.779162 11.774478; 1 -2.377236 1.126365 10.467320; 1 -2.525178 1.737022 12.122348; 1 -1.000630 1.914129 11.242299; 1 -1.515225 7.302825 10.537626; 1 -3.085120 7.457638 11.335396; 1 -2.970356 7.582247 9.576904; 1 -0.059711 3.939427 11.712766; 1 -1.029997 4.895270 12.837712; 1 -0.217293 5.682863 11.479660; 6 -1.014684 5.010116 6.934201; 6 -2.276542 4.518584 6.428414; 6 -0.192078 4.000474 7.530382; 6 -2.371306 3.202492 5.709013; 1 -3.002385 5.279340 6.144717; 6 -0.785609 2.683842 7.520297; 1 0.754930 4.233784 8.007307; 6 -1.552568 2.189892 6.329449; 1 -1.953524 1.185808 6.463156; 1 2.002896 3.375671 3.466238; 1 1.540158 7.395094 2.012069; 1 -1.675505 5.493938 4.135503; 1 -0.278902 1.924572 8.113798; 1 -3.380758 2.951888 5.381912; 1 -0.730283 6.057407 6.930601; |
| 30       | 77 5.813432 1.878882 5.659285; 77 7.765285 2.372904 1.642039; 6 9.185431 3.156706 0.312487; 6 9.369181 1.701539 0.162052; 6 8.163003 1.194768 -0.362493; 6 7.264968 2.316390 -0.662949; 6 7.910221 3.524147 -0.328676; 6 6.322506 2.752182 7.650270; 6 6.337874 1.310344 7.772026; 6 4.988390 0.820247 7.607406; 6 4.143098 1.939040 7.331623; 6 4.964225 3.128638 7.326549; 6 7.434391 4.922888 -0.588796; 6 10.621692 0.941999 0.485369; 6 10.275848 4.125153 0.667530; 6 5.908167 2.164643 -1.286914; 6 7.836977 -0.243721 -0.641306; 6 2.653888 1.898920 7.140474; 6 4.457471 4.537999 7.200303; 6 4.547517 -0.607771 7.756485; 6 7.457128 3.686022 7.961517; 6 7.521279 0.484774 8.192631; 1 7.842515 5.312009 -1.533570; 1 7.743917 5.605701 0.208183; 1 6.343258 4.970713 -0.656006; 1 11.136953 1.370558 1.350262; 1 11.325788 0.958479 -0.359897; 1 10.407857 -0.105722 0.717249; 1 9.865278 5.060232 1.059563; 1 10.881191 4.369220 -0.217972; 1 10.945746 3.709709 1.426049; 1 5.357741 1.323593 -0.851972; 1 5.986720 1.976756 -2.367611; 1 5.300407 3.063652 -1.150167; 1 8.492752 -0.919217 -0.084532; 1 7.948673 -0.476904 -1.710216; 1 6.804508 -0.482463 -0.364611; 1 2.126129 2.005417 8.099490; 1 2.329360 0.953970 6.693035; 1 2.310118 2.708051 6.488958; 1 5.229741 5.205906 6.808119; 1 4.142359 4.931117 8.177542; 1 3.595820 4.598816 6.528268; 1 3.680373 -0.830607 7.126505; 1 4.263523 -0.830609 8.795359; 1 5.344043 -1.305533 7.480855; 1 8.424780 3.232214 7.727364; 1 7.468421 3.960629 9.027206; 1 7.384015 4.611525 7.382578; 1 7.471356 -0.529637 7.784863; 1 7.571755 0.398605 9.287529; 1 8.459779 0.931382 7.851974; 6 6.079683 0.712463 3.890481; 6 5.211553 1.824847 3.611471; 6 7.402127 1.104393 4.341726; 6 5.832834 3.116643 3.832727; 1 4.173078 1.691637 3.324105; 6 8.136002 2.252810 3.692277; 1 8.025200 0.298713 4.726959; 6 7.256838 3.376394 3.402921; 1 7.595723 4.402745 3.535518; 1 9.151711 2.410833 4.051654; 1 5.741222 -0.317190 3.827215; 1 5.161774 3.973584 3.800594;                                                                                                                                                                                                                                                                                                                                                                                                                           |



|          |                                                                                                                                                                                                                                                                                                                                                                                                                                                                                                                                                                                                                                                                                                                                                                                                                                                                                                                                                                                                                                                                                                                                                                                                                                                                                                                                                                                                                                                                                                                                                                                                                                                                                                                                                                                                                                                                                                                                                                                                                                                                                                                                                                                                                                                                                                                                                                                                                                                  |
|----------|--------------------------------------------------------------------------------------------------------------------------------------------------------------------------------------------------------------------------------------------------------------------------------------------------------------------------------------------------------------------------------------------------------------------------------------------------------------------------------------------------------------------------------------------------------------------------------------------------------------------------------------------------------------------------------------------------------------------------------------------------------------------------------------------------------------------------------------------------------------------------------------------------------------------------------------------------------------------------------------------------------------------------------------------------------------------------------------------------------------------------------------------------------------------------------------------------------------------------------------------------------------------------------------------------------------------------------------------------------------------------------------------------------------------------------------------------------------------------------------------------------------------------------------------------------------------------------------------------------------------------------------------------------------------------------------------------------------------------------------------------------------------------------------------------------------------------------------------------------------------------------------------------------------------------------------------------------------------------------------------------------------------------------------------------------------------------------------------------------------------------------------------------------------------------------------------------------------------------------------------------------------------------------------------------------------------------------------------------------------------------------------------------------------------------------------------------|
| 34-36_ts | 6 7.272700 7.144698 1.118700; 6 6.552485 7.716611 0.001948; 6 5.166796 7.885534 0.380283; 6 5.031018 7.479552 1.740865; 6 6.330913 7.056988 2.214710; 6 8.675083 6.608731 1.101248; 1 9.306072 7.162667 0.399992; 1 8.689581 5.550224 0.801008; 1 9.144506 6.687155 2.084960; 6 7.108043 7.920330 -1.379419; 1 6.623671 8.758132 -1.890946; 1 6.956476 7.023902 -1.997019; 1 8.181758 8.125019 -1.349470; 6 4.061890 8.360170 -0.519078; 1 3.283217 8.887904 0.041060; 1 3.579816 7.517028 -1.034855; 1 4.434633 9.041445 -1.289986; 6 3.755650 7.450027 2.532879; 1 3.944010 7.577183 3.602982; 1 3.232874 6.491005 2.405772; 1 3.066438 8.241290 2.220391; 6 6.612221 6.447356 3.558648; 1 7.653136 6.590484 3.858316; 1 6.413802 5.366183 3.541834; 1 5.981062 6.884428 4.338766; 6 7.721336 10.957075 0.939062; 6 6.455371 11.335463 1.574166; 1 5.638976 11.828254 1.055040; 6 6.363653 10.913702 2.935861; 6 7.554355 10.194642 3.391229; 1 7.490923 9.689529 4.351815; 6 8.863146 10.801768 3.022239; 6 8.952343 11.186620 1.735835; 77 6.646800 9.207577 1.671128; 1 11.058354 13.036179 4.485021; 6 11.966717 12.770154 5.036507; 6 12.682671 11.616678 4.396422; 1 11.677906 12.546721 6.067050; 1 12.606209 13.663622 5.055944; 6 13.260889 10.510555 5.037613; 6 12.948955 11.521940 2.949776; 6 13.794453 9.627344 3.983776; 6 13.334902 10.225962 6.508074; 6 13.701069 10.356090 2.706867; 6 12.585290 12.586959 1.957208; 77 11.741338 9.578903 3.531121; 6 14.665003 8.431221 4.235947; 1 12.653716 10.863236 7.078807; 1 14.351377 10.404376 6.885442; 1 13.073866 9.186700 6.728125; 6 14.322685 9.920312 1.412682; 1 11.579692 12.980926 2.136470; 1 12.617643 12.208189 0.931965; 1 13.281913 13.435316 2.020309; 6 10.777976 8.251479 4.747307; 6 10.135408 8.707864 5.921925; 1 14.308051 7.858003 5.095841; 1 15.700384 8.741589 4.439684; 1 14.677748 7.761819 3.371428; 1 13.788770 10.330506 0.550890; 1 14.316749 8.831196 1.316572; 1 15.367736 10.255903 1.351834; 6 10.740344 6.856167 4.525059; 1 10.137237 9.771668 6.153617; 6 9.485975 7.838878 6.804160; 6 10.114970 5.978115 5.414809; 1 11.220848 6.450286 3.639034; 6 9.477069 6.464529 6.558987; 1 8.984161 5.783687 9.628177; 6 10.805034 11.706978 1.309484; 1 11.429645 8.519982 2.372572; 1 5.467032 11.052950 3.532315; 1 9.606347 11.034919 3.784300; 1 7.783413 11.100440 -0.137789; 1 8.996228 8.237218 7.690823; 1 10.121486 4.909082 5.210318; |
| 36       | 6 7.470398 7.201206 1.200511; 6 6.882837 7.857293 0.049765; 6 5.466885 7.994201 0.278787; 6 5.177771 7.475860 1.583904; 6 6.412557 7.000892 2.161471; 6 8.858818 6.638633 1.270574; 1 9.588472 7.300339 0.791423; 1 8.908895 5.663402 0.763468; 1 9.174347 6.494643 2.305182; 6 7.603298 8.168532 -1.231542; 1 7.148609 9.014664 -1.756525; 1 7.583921 7.307276 -1.914298; 1 8.651753 8.418958 -1.045306; 6 4.461970 8.538963 -0.695575; 1 3.636605 9.045372 -0.184821; 1 4.025899 7.734027 -1.304377; 1 4.917014 9.257756 -1.383637; 6 3.815645 7.373617 2.208954; 1 3.870789 7.407553 3.300976; 1 3.325019 6.428367 1.935617; 1 3.159424 8.187603 1.884274; 6 6.540997 6.276192 3.470828; 1 7.520058 6.438507 3.927081; 1 6.405441 5.194257 3.329557; 1 5.786077 6.609925 4.189162; 6 6.781026 10.989152 1.450487; 6 6.470242 11.326018 1.671396; 1 5.817908 11.773671 0.927262; 6 5.993390 10.883560 2.951837; 6 7.026396 10.218722 3.743554; 1 6.697375 9.682906 4.630295; 6 8.306794 11.002617 3.848550; 6 8.779419 11.407225 2.576405; 77 6.705881 9.222573 1.825375; 1 10.537022 13.724250 4.449185; 6 11.398508 13.268054 4.950706; 6 11.808536 11.981102 4.292354; 1 11.124611 13.113842 5.998121; 1 12.212645 14.005861 4.928060; 6 12.186673 10.773597 4.929179; 6 11.951295 11.794204 2.858330; 6 12.530529 9.804210 3.892568; 6 12.309305 10.524478 6.403674; 6 12.429533 10.471061 2.617308; 6 11.803821 12.879689 1.831683; 77 10.323244 10.193568 3.563597; 6 13.202197 8.484022 4.142739; 1 11.756103 11.265896 6.987328; 1 13.361597 10.573517 6.716806; 1 11.924263 9.538108 6.676608; 6 12.860344 9.909390 1.291603; 1 11.011699 13.588919 2.094008; 1 11.574973 12.474667 0.841651; 1 12.733952 13.459198 1.745805; 6 9.718706 8.756581 4.944102; 6 9.077576 9.088590 6.154591; 1 12.771741 7.971699 5.007091; 1 14.275883 8.623464 4.333908; 1 13.104943 7.815362 3.282031; 1 12.286516 10.339712 0.465694; 1 12.727312 8.824720 1.255707; 1 13.922835 10.120173 1.103742; 6 10.070111 7.401425 4.784308; 1 8.786894 10.118507 6.344541; 6 8.800725 8.133402 7.138072; 6 9.801034 6.438123 5.763802; 1 10.579142 7.089543 3.877261; 6 9.158505 6.797409 6.949280; 1 8.943653 6.052755 7.711692; 1 9.242753 12.386430 2.456331; 1 9.764960 9.102608 2.570955; 1 4.948619 10.961418 3.239102; 1 8.369043 11.682346 4.700916; 1 8.260505 11.123670 0.438586; 1 8.304061 8.439268 8.057041; 1 10.095886 5.403942 5.595035;     |
| 36-32_ts | 6 7.324359 6.964351 1.513840; 6 6.745793 7.416930 0.263104; 6 5.368408 7.765097 0.504422; 6 5.105077 7.587204 1.902562; 6 6.310601 7.092244 2.525770; 6 8.660074 6.294205 1.654339; 1 9.424625 6.787917 1.046447; 1 8.603707 5.244394 1.330158; 1 9.005427 6.302959 2.689973; 6 7.420773 7.349343 -1.077580; 1 7.014352 8.090603 -1.772986; 1 7.290816 6.359334 -1.537460; 1 8.495853 7.532872 -0.989937; 6 4.370865 8.193529 -0.533575; 1 3.625514 8.879802 -0.119064; 1 3.828950 7.327742 -0.940066; 1 4.855635 8.698687 -1.374483; 6 3.781741 7.774240 2.588323; 1 3.912390 8.070632 3.633475; 1 3.194844 6.844269 2.582707; 1 3.177624 8.544603 2.098488; 6 6.406303 6.610997 3.943884; 1 7.437689 6.586320 4.298001; 1 5.996206 5.593905 4.027516; 1 5.840975 7.250329 4.627993; 6 8.284663 10.558140 0.950191; 6 6.932435 11.103457 0.827372; 1 6.436386 11.334918 -0.111209; 6 6.257240 11.179264 2.093533; 6 7.076295 10.725595 3.211692; 1 6.540447 10.582380 4.148122; 6 8.452607 11.353214 3.271567; 6 9.117621 11.233948 2.000470; 77 6.802838 9.165077 1.669140; 1 10.524399 13.33027 5.539621; 6 11.398076 12.753594 5.856932; 6 11.827216 11.781429 4.796791; 1 11.134632 12.246145 6.789555; 1 12.197524 13.473182 6.087054; 6 12.312985 10.468484 4.974218; 6 11.819075 12.049102 3.368310; 6 12.683234 9.923548 3.668814; 6 12.509672 9.752322 6.277756; 6 12.441939 10.921643 2.687266; 6 11.578003 13.408833 2.771456; 77 10.356552 10.370768 3.501059; 6 13.428751 8.635730 3.453798; 1 11.990585 10.257258 7.097108; 1 13.575928 9.703821 6.539297; 1 12.134315 8.724922 6.233271; 6 12.847500 10.874690 1.241953; 1 10.665198 13.871728 3.162259; 1 11.487626 13.366090 1.682310; 1 12.413501 14.084453 3.001074; 6 9.539885 8.711853 4.612257; 6 8.573252 8.979484 5.606887; 1 13.175042 7.889978 4.212144; 1 14.515521 8.796585 3.510421; 1 13.213056 8.201625 2.472255; 1 12.142429 11.417395 0.605070; 1 12.895475 9.845316 0.874472; 1 13.839552 11.327133 1.094401; 6 10.252068 7.495966 4.722027; 1 7.996915 9.893221 5.556193; 6 8.383448 8.112072 6.682311; 6 10.051085 6.620622 5.792145; 1 10.966996 7.237579 3.947247; 6 9.120273 6.927944 6.786156; 1 8.962619 6.251930 7.622326; 1 9.666643 12.092114 1.609482; 1 9.390738 8.967806 3.309219; 1 5.212002 11.465195 2.174142; 1 8.478460 12.303520 3.813350; 1 8.786414 10.288916 0.021260; 1 7.655716 8.366076 7.449876; 1 10.622203 5.696360 5.844349;     |
| 32       | 77 2.314316 4.393065 2.584673; 6 0.076633 4.914185 2.145719; 6 0.879392 5.953905 1.577757; 6 1.605270 6.591285 2.645091; 6 1.242999 5.944096 3.880111; 6 0.303004 4.896999 3.580881; 6 4.085351 3.818657 3.699918; 6 4.374868 4.698506 2.593170; 6 4.067178 4.114611 1.312216; 6 4.295574 2.660600 1.130979; 77 2.763158 1.567209 2.209073; 6 4.817073 1.908083 2.246813; 6 4.317358 2.365292 3.518680; 6 2.761243 -0.741562 2.167478; 6 1.832132 -0.352144 3.195683; 6 0.772889 0.386206 2.579286; 6 1.040619 0.464812 1.153824; 6 2.268359 -0.244339 0.908038; 6 2.871412 -0.513266 -0.441239; 6 0.085294 0.919426 0.087789; 6 -0.524395 0.715347 3.255440; 6 1.913378 -0.740091 4.644115; 6 3.968390 -1.614262 2.363454; 6 -0.503627 4.155287 4.607896; 6 1.681274 6.359894 5.255344; 6 2.493474 7.794498 2.502237; 6 0.891029 6.374899 0.136328; 6 -1.027273 4.211193 1.413598; 1 4.116253 4.743532 0.425719; 1 5.440476 1.025534 2.133053; 1 4.155563 4.213834 4.711438; 1 -0.744665 3.969299 0.385513; 1 -                                                                                                                                                                                                                                                                                                                                                                                                                                                                                                                                                                                                                                                                                                                                                                                                                                                                                                                                                                                                                                                                                                                                                                                                                                                                                                                                                                                                                                 |

|                                |                                                                                                                                                                                                                                                                                                                                                                                                                                                                                                                                                                                                                                                                                                                                                                                                                                                                                                                                                                                                                                                                                                                                                                                                                                                                                                                                                                                                                                                                                                                                                                                                                                                                                                                                                                                                                                                                                                                                                                                                                                                                                       |
|--------------------------------|---------------------------------------------------------------------------------------------------------------------------------------------------------------------------------------------------------------------------------------------------------------------------------------------------------------------------------------------------------------------------------------------------------------------------------------------------------------------------------------------------------------------------------------------------------------------------------------------------------------------------------------------------------------------------------------------------------------------------------------------------------------------------------------------------------------------------------------------------------------------------------------------------------------------------------------------------------------------------------------------------------------------------------------------------------------------------------------------------------------------------------------------------------------------------------------------------------------------------------------------------------------------------------------------------------------------------------------------------------------------------------------------------------------------------------------------------------------------------------------------------------------------------------------------------------------------------------------------------------------------------------------------------------------------------------------------------------------------------------------------------------------------------------------------------------------------------------------------------------------------------------------------------------------------------------------------------------------------------------------------------------------------------------------------------------------------------------------|
|                                | 1.922441 4.849474 1.367617; 1 -1.319255 3.284360 1.909218; 1 0.657792 5.536576 -0.526576; 1 1.868525 6.768493 -0.161433; 1 0.149742 7.164673 -0.054946; 1 3.047272 7.779851 1.557417; 1 3.224481 7.858046 3.314561; 1 1.906256 8.723697 2.520531; 1 2.694163 6.776252 5.251610; 1 1.674724 5.512599 5.947531; 1 1.013509 7.129403 5.668610; 1 -0.953116 3.252261 4.193450; 1 -1.321313 4.782274 4.994597; 1 0.110496 3.853938 5.462596; 1 2.951618 -0.820375 4.982634; 1 1.435478 -1.714265 4.824413; 1 1.415000 -0.005250 5.283079; 1 4.716855 -1.453333 1.581010; 1 3.694760 -2.678697 2.336839; 1 4.451490 -1.428048 3.328608; 1 2.612892 0.273874 -1.155746; 1 2.510968 -1.466167 -0.854496; 1 3.964169 -0.571036 -0.394590; 1 0.611878 1.359687 -0.764949; 1 -0.611697 1.669488 0.463213; 1 -0.511126 0.076620 -0.293450; 1 -1.069881 1.501794 2.731952; 1 -0.375251 1.038134 4.289116; 1 -1.177180 -0.170229 3.278142; 1 4.536605 1.778370 4.408181; 1 4.505525 2.309240 0.122635; 1 4.694219 5.729559 2.717563;                                                                                                                                                                                                                                                                                                                                                                                                                                                                                                                                                                                                                                                                                                                                                                                                                                                                                                                                                                                                                                                                |
| TS for 32/benzene analog of 2  | 6 6.504093 6.786489 1.148289; 6 7.057297 7.598064 0.085323; 6 6.023169 8.518931 -0.322324; 6 4.828625 8.227265 0.436938; 6 5.123133 7.150463 1.333078; 6 7.176004 5.611649 1.799981; 1 8.262351 5.717504 1.793264; 1 6.929233 4.679318 1.272219; 1 6.860998 5.491767 2.841466; 6 8.365998 7.389436 -0.615909; 1 8.797197 8.335753 -0.954753; 1 8.244611 6.741539 -1.497178; 1 9.096883 6.914068 0.041830; 6 6.120351 9.485055 -1.469172; 1 5.468333 10.352205 -1.324510; 1 5.825952 9.005253 -2.413406; 1 7.142010 9.856646 -1.589634; 6 3.490906 8.887651 0.261171; 1 2.927165 8.915241 1.199298; 1 2.877198 8.347751 -0.474015; 1 3.593935 9.917320 -0.094106; 6 4.154652 6.494690 2.274990; 1 4.665085 6.069198 3.144309; 1 3.611365 5.675426 1.782111; 1 3.407345 7.204319 2.644961; 6 7.120410 11.070756 1.855905; 6 6.048575 10.776870 2.786739; 1 5.034572 11.163883 2.734922; 6 6.443655 9.804149 3.771817; 6 7.768502 9.225739 3.609460; 1 7.943773 8.393211 4.289139; 6 8.648251 11.202637 3.851652; 6 8.465214 11.446613 2.448898; 77 6.554994 8.974841 1.808430; 1 10.023607 6.317938 3.118461; 6 10.892951 6.630660 2.531391; 6 11.281474 8.048655 2.828193; 1 10.656326 6.485111 1.474647; 1 11.715235 5.944714 2.780643; 6 11.678652 9.040888 1.900721; 6 11.446878 8.566493 4.179343; 6 12.023686 10.228494 2.658608; 6 11.795781 8.911834 0.409732; 6 11.953130 9.894965 4.073858; 6 11.261265 7.768553 5.438083; 77 9.886280 9.984316 3.187518; 6 12.635529 11.473347 2.079948; 1 11.201340 8.079807 0.024612; 1 12.840041 8.738136 0.110385; 1 11.457932 9.819814 -0.099768; 6 12.414828 10.768087 5.205578; 1 10.386246 7.112319 5.374961; 1 11.120767 8.418710 6.307023; 1 12.131964 7.127845 5.643309; 1 12.190331 11.722868 1.111609; 1 13.717794 11.351524 1.925826; 1 12.491218 12.334731 2.739257; 1 11.865251 10.556371 6.127696; 1 12.278466 11.828953 4.976085; 1 13.483338 10.608191 5.410362; 1 8.870625 12.375563 2.041414; 1 6.850057 11.626147 0.958632; 1 5.740670 9.445530 4.521237; 1 8.249566 11.615133 4.779983;                               |
| TS for 30/benzene analog of 10 | 77 5.892629 2.348536 5.407714; 77 7.761356 2.321828 2.044014; 6 8.795243 3.043614 0.189652; 6 9.450018 1.791576 0.497437; 6 8.475952 0.749750 0.414944; 6 7.211790 1.354788 0.058063; 6 7.412413 2.767589 -0.142988; 6 6.302086 2.261947 7.627907; 6 6.021397 0.922425 7.176645; 6 4.639312 0.851362 6.756733; 6 4.076178 2.157828 6.887383; 6 5.104302 3.041566 7.390204; 6 6.421377 3.740735 -0.714167; 6 10.913520 1.613368 0.786398; 6 9.479124 4.372644 0.030833; 6 5.937141 0.608200 -0.217549; 6 8.728694 -0.718894 0.601508; 6 2.647820 2.535945 6.615337; 6 4.903420 4.473220 7.801618; 6 3.912406 -0.388832 6.321613; 6 7.543472 2.728136 8.332986; 6 6.961510 -0.245520 7.277421; 1 6.473644 3.769035 -1.813101; 1 6.602623 4.756576 -0.350098; 1 5.395174 3.475905 -0.441077; 1 11.343121 2.504784 1.253529; 1 11.480921 1.423043 -0.136115; 1 11.092573 0.768689 1.459581; 1 8.791077 5.200477 0.225794; 1 9.867588 4.496643 -0.990207; 1 10.323777 4.476887 0.718924; 1 5.844729 -0.280909 0.414740; 1 5.892778 0.273205 -1.263236; 1 5.059120 1.235741 -0.035778; 1 9.540023 -0.901850 1.313476; 1 9.011446 -1.199527 -0.346735; 1 7.839918 -1.237263 0.974418; 1 2.019351 2.381876 7.504428; 1 2.218614 1.937721 5.804980; 1 2.556840 3.588982 6.332206; 1 5.834687 5.042767 7.730355; 1 4.552564 4.538780 8.841539; 1 4.161354 4.974159 7.172223; 1 3.111528 -0.159221 5.611316; 1 3.452117 -0.903791 7.177794; 1 4.586234 -1.103180 5.838552; 1 8.428153 2.180241 7.993917; 1 7.464518 2.585596 9.421414; 1 7.730689 3.791165 8.153292; 1 6.762769 -0.991898 6.501406; 1 6.865007 -0.749053 8.249404; 1 8.004067 0.070580 7.172484; 6 5.994698 2.036922 3.133079; 6 5.383378 3.260655 3.606729; 6 7.490508 1.674835 4.233308; 6 6.423530 4.083652 4.177536; 6 8.494671 2.680896 3.959078; 6 7.812893 3.893332 3.571249; 1 8.387938 4.789933 3.346624; 1 4.340793 3.521823 3.448670; 1 7.779985 0.632736 4.347583; 1 5.372330 1.191285 2.849528; 1 6.179944 5.069055 4.570513; 1 9.558725 2.541735 4.128010;                                                         |
| benzene analog of 10           | 77 -0.725837 0.136105 1.480886; 77 0.741578 0.288389 -1.538570; 6 2.507387 0.377478 -3.140456; 6 2.447129 -0.936027 -2.554645; 6 1.154655 -1.494594 -2.833604; 6 0.409638 -0.512750 -3.618664; 6 1.259057 0.627520 -3.809290; 6 -0.128436 0.089733 3.652843; 6 -0.114237 -1.269761 3.116866; 6 -1.469572 -1.630084 2.811459; 6 -2.317522 -0.512566 3.135043; 6 -1.491756 0.536760 3.668890; 6 0.928602 1.847827 -4.620552; 6 3.575781 -1.630374 -1.846692; 6 3.706195 1.283904 -3.143467; 6 -0.922207 -0.752586 -4.271482; 6 0.716139 -2.905908 -2.564500; 6 -3.816610 -0.488430 3.030489; 6 -1.982476 1.850191 4.208010; 6 -1.938487 -2.969117 2.317312; 6 1.049242 0.797695 4.260461; 6 1.077101 -2.184478 3.098304; 1 1.275781 1.738692 -5.657979; 1 1.402412 2.745726 -4.211115; 1 -0.149713 2.028145 -4.650781; 1 4.190441 -0.925762 -1.277481; 1 4.237718 -2.567718 -1.3205808 -2.385235 -1.147172; 1 3.415364 2.337379 -3.207848; 1 4.365149 1.076022 -3.998862; 1 4.306672 1.161970 -2.236043; 1 -1.578612 -1.352466 -3.633763; 1 -0.806712 -1.289215 -5.224304; 1 -1.441568 0.187356 -4.481221; 1 1.222501 -3.323478 -1.689073; 1 0.935767 -3.560450 -3.420508; 1 -0.360992 -2.963988 -2.378589; 1 -4.289923 -0.870137 3.946666; 1 -4.172993 -1.107484 2.200630; 1 -4.193593 0.526899 2.870390; 1 -1.215095 2.625734 4.131231; 1 -2.261174 1.763143 5.267932; 1 -2.865760 2.204387 3.666977; 1 -2.802479 -2.874652 1.651767; 1 -2.239063 -3.615180 3.154685; 1 -1.151609 -3.489800 1.764445; 1 1.973417 0.575457 3.718367; 1 1.198934 0.494914 5.306942; 1 0.915522 1.883560 4.245181; 1 0.966329 -2.972184 2.347060; 1 1.219646 -2.671384 4.073981; 1 1.998488 -1.640047 2.868832; 6 -1.026211 -0.329936 -0.668083; 6 -1.918296 0.685934 -0.213255; 6 1.125440 0.492262 0.636942; 6 -1.185369 1.852592 0.189369; 6 1.299273 1.728937 -0.052631; 6 0.055647 2.163967 -0.622068; 1 0.029725 3.047418 -1.260433; 1 -2.986331 0.548331 -0.046018; 1 2.010485 -0.013774 1.025147; 1 2.261006 2.200095 -0.254221; 1 -1.708861 2.691559 0.648461; 1 -1.435756 -1.313917 -0.900964; |
| benzene analog of 11           | 77 -0.430259 0.072190 1.365505; 77 0.396678 0.429294 -1.295747; 6 2.590878 0.283082 -2.307642; 6 2.336323 -0.960243 -1.663325; 6 1.104088 -1.504961 -2.192933; 6 0.618579 -0.602064 -3.220566; 6 1.526980 0.528460 -3.250482; 6 0.637125 -0.801161 3.279005; 6 0.108714 -1.967325 2.594202; 6 -1.300138 -1.839177 2.502805; 6 -1.674323 -0.567717 3.086177; 6 -0.461815 0.045882 3.615819; 6 1.480753 1.659701 -4.238579; 6 3.241211 -1.621971 -0.665906; 6 3.777595 1.172824 -2.071163; 6 -0.485616 -0.881941 -4.199856; 6 0.554066 -2.875086 -1.918032; 6 -3.078404 -0.113134 3.367741; 6 -0.408579 1.286340 4.461141; 6 -2.254417 -2.845563 1.926832; 6 2.071563 -0.607498 3.681236; 6 0.915755 -3.169487 2.200464; 1 2.082195 1.426110 -5.128396; 1 1.875229 2.587883 -3.812466; 1 0.458711 1.856950 -4.574179; 1 3.676201 -0.896868 0.028971; 1 4.072205 -2.133340 -1.172954; 1 2.707129 -2.369689 -0.076520; 1 3.537160 2.224070 -2.258232; 1 4.613784 0.908022 -2.734274; 1 4.139607 1.094447 -                                                                                                                                                                                                                                                                                                                                                                                                                                                                                                                                                                                                                                                                                                                                                                                                                                                                                                                                                                                                                                                                                |

|                        |                                                                                                                                                                                                                                                                                                                                                                                                                                                                                                                                                                                                                                                                                                                                                                                                                                                                                                                                                                                                                                                                                                                                                                                                                                                                                                                                                                                                                                                                                                                                                                                                                                                                                                                                                                                                                                                                                                                                                                                                                                                                                     |
|------------------------|-------------------------------------------------------------------------------------------------------------------------------------------------------------------------------------------------------------------------------------------------------------------------------------------------------------------------------------------------------------------------------------------------------------------------------------------------------------------------------------------------------------------------------------------------------------------------------------------------------------------------------------------------------------------------------------------------------------------------------------------------------------------------------------------------------------------------------------------------------------------------------------------------------------------------------------------------------------------------------------------------------------------------------------------------------------------------------------------------------------------------------------------------------------------------------------------------------------------------------------------------------------------------------------------------------------------------------------------------------------------------------------------------------------------------------------------------------------------------------------------------------------------------------------------------------------------------------------------------------------------------------------------------------------------------------------------------------------------------------------------------------------------------------------------------------------------------------------------------------------------------------------------------------------------------------------------------------------------------------------------------------------------------------------------------------------------------------------|
|                        | 1.041214; 1 -1.264066 -1.507692 -3.754312; 1 -0.101733 -1.406268 -5.087321; 1 -0.964390 0.041310 -4.538614; 1 0.788954 -3.205378 -0.902683; 1 0.970832 -3.616240 -2.614626; 1 -0.534586 -2.895806 -2.027276; 1 -3.441223 -0.525204 4.321376; 1 -3.768954 -0.436103 2.583252; 1 -3.140753 0.976802 3.430150; 1 0.543603 1.814203 4.344482; 1 -0.520728 1.043347 5.527109; 1 -1.206300 1.985444 4.193440; 1 -3.115720 -2.358476 1.458780; 1 -2.641579 -3.519569 2.704171; 1 -1.775308 -3.467843 1.164193; 1 2.758393 -0.970207 2.909791; 1 2.304503 -1.148941 4.609948; 1 2.299737 0.448523 3.853511; 1 0.461335 -3.711873 1.366023; 1 0.995889 -3.875476 3.040129; 1 1.935022 -2.897080 1.912821; 6 -1.415667 -0.116741 -0.449011; 6 -2.501466 0.849598 -0.702087; 6 0.160683 1.849396 0.960688; 6 -2.155040 2.036279 -1.224623; 6 0.247034 2.410176 -0.348685; 6 -0.707622 2.241175 -1.452497; 1 -0.450958 2.859082 -2.315051; 1 -3.529768 0.602646 -0.433206; 1 0.730108 2.399446 1.724282; 1 1.050289 3.129667 -0.527595; 1 -1.719077 -1.161320 -0.600842; 1 -2.856173 2.848361 -1.410826;                                                                                                                                                                                                                                                                                                                                                                                                                                                                                                                                                                                                                                                                                                                                                                                                                                                                                                                                                                                        |
| benzene analog<br>of 2 | 77 -0.498548 11.975002 5.427764; 77 -0.828568 9.442240 4.278322; 6 -1.394833 7.891947 2.697612; 6 -0.107155 11.343820 3.572146; 6 -0.360440 14.172370 5.696357; 6 -0.662048 7.645639 1.410111; 6 -2.574160 8.691388 2.854595; 6 0.039745 9.970129 6.000479; 6 -0.056883 6.195999 4.199180; 6 1.250337 10.747128 6.100512; 6 0.629734 13.743369 8.084422; 6 2.382514 10.608602 5.191058; 6 -1.089680 7.261908 3.967641; 6 -2.094471 7.701529 4.914352; 6 -0.427864 13.603110 7.027362; 6 0.914447 10.383314 3.234360; 6 -3.006670 8.575971 4.221236; 6 -1.713069 12.989447 7.199488; 6 2.219436 10.322546 3.883665; 6 -2.448062 13.156762 5.976427; 6 -1.619233 13.877638 5.041719; 6 0.725192 15.069074 5.172877; 6 -2.047155 14.386696 3.694859; 6 -2.228402 12.346459 8.455663; 6 -3.879060 12.766158 5.754211; 6 -2.252803 7.199587 6.321286; 6 -4.267828 9.153207 4.792413; 6 -3.276874 9.460501 1.772192; 1 -0.655934 11.781616 2.733025; 1 0.394604 7.425756 1.586995; 1 -0.713819 8.510833 0.741736; 1 -1.093840 6.789133 0.873448; 1 0.828507 6.354792 3.577120; 1 -0.457994 5.199162 3.962654; 1 0.276147 6.182657 5.240724; 1 1.533849 11.031522 7.116586; 1 0.621440 12.899097 8.780888; 1 0.473354 14.657792 8.673842; 1 1.629483 13.800071 7.644609; 1 3.079457 10.097573 3.255078; 1 1.704002 14.786681 5.570709; 1 0.540169 16.117186 5.451624; 1 0.791550 15.021159 4.082343; 1 -1.191750 14.496943 3.021684; 1 -2.533821 15.368743 3.776584; 1 -2.756820 13.705680 3.214278; 1 -2.924539 11.531125 8.234375; 1 -2.762052 13.071140 9.087421; 1 -1.414523 11.929272 9.056363; 1 -4.081597 12.566183 4.698399; 1 -4.555296 13.572938 6.072388; 1 -4.147097 11.870575 6.321295; 1 -1.285755 6.940534 6.762400; 1 -2.884176 6.300535 6.353476; 1 -2.717227 7.951551 6.967193; 1 -4.179295 9.328742 5.868186; 1 -5.112384 8.465527 4.639754; 1 -4.529335 10.103385 4.319138; 1 -3.765783 10.356135 2.168553; 1 -4.052220 8.851403 1.285495; 1 -2.580640 9.784609 0.992698; 1 3.380022 10.681552 5.621200; 1 0.930164 10.076396 2.185923; 1 -0.385404 9.612906 6.942980; |

## 8. Kinetic modeling of thermolysis of complex 1 (0.1 M) at 50 °C (Fig. 1B) using computed activation parameters (Fig. 2).

**Table S17.** Calculated time dependence of concentrations of 1, 2 and all intermediates.

| 50 C<br>Reaction<br>time, s | Concentrations, M |          |          |             |          |             |          |          |          |          |            |
|-----------------------------|-------------------|----------|----------|-------------|----------|-------------|----------|----------|----------|----------|------------|
|                             | 1                 | 7        | 8        | 9           | 10       | 11          | 12       | 13       | 15       | 2        | mesitylene |
| 0                           | 0.1               | 0        | 0        | 0           | 0        | 0           | 0        | 0        | 0        | 0        | 0          |
| 0.00242406                  | 0.1               | 2.33E-11 | 4.41E-08 | 7.56584E-09 | 1.48E-13 | 4.38819E-08 | 9.48E-08 | 1.01E-08 | 1.39E-12 | 2.48E-11 | 7.82E-15   |
| 0.00407301                  | 0.1               | 6.17E-11 | 9.87E-08 | 1.14917E-08 | 3.92E-13 | 6.6652E-08  | 1.44E-07 | 1.72E-08 | 3.17E-12 | 6.52E-11 | 2.27E-14   |
| 0.00572195                  | 0.099999          | 1.31E-10 | 1.73E-07 | 1.45066E-08 | 8.34E-13 | 8.41381E-08 | 1.82E-07 | 2.33E-08 | 5.66E-12 | 1.38E-10 | 5.50E-14   |
| 0.00704998                  | 0.099999          | 2.12E-10 | 2.43E-07 | 1.64467E-08 | 1.35E-12 | 9.5391E-08  | 2.06E-07 | 2.77E-08 | 8.08E-12 | 2.22E-10 | 9.80E-14   |
| 0.008378                    | 0.099999          | 3.21E-10 | 3.21E-07 | 1.80099E-08 | 2.04E-12 | 1.04458E-07 | 2.26E-07 | 3.15E-08 | 1.08E-11 | 3.34E-10 | 1.64E-13   |
| 0.00970603                  | 0.099999          | 4.60E-10 | 4.06E-07 | 1.92716E-08 | 2.92E-12 | 1.11775E-07 | 2.41E-07 | 3.50E-08 | 1.39E-11 | 4.77E-10 | 2.58E-13   |
| 0.01261835                  | 0.099998          | 8.65E-10 | 6.07E-07 | 2.13534E-08 | 5.48E-12 | 1.2385E-07  | 2.68E-07 | 4.18E-08 | 2.13E-11 | 8.92E-10 | 5.87E-13   |
| 0.01553068                  | 0.099998          | 1.43E-09 | 8.24E-07 | 2.26516E-08 | 9.03E-12 | 1.31379E-07 | 2.84E-07 | 4.77E-08 | 2.97E-11 | 1.47E-09 | 1.14E-12   |
| 0.01844301                  | 0.099997          | 2.17E-09 | 1.05E-06 | 2.34323E-08 | 1.37E-11 | 1.35908E-07 | 2.94E-07 | 5.29E-08 | 3.89E-11 | 2.22E-09 | 2.00E-12   |
| 0.02135534                  | 0.099997          | 3.09E-09 | 1.29E-06 | 2.38946E-08 | 1.95E-11 | 1.38589E-07 | 2.99E-07 | 5.78E-08 | 4.88E-11 | 3.16E-09 | 3.25E-12   |
| 0.0261677                   | 0.099996          | 5.02E-09 | 1.68E-06 | 2.43109E-08 | 3.15E-11 | 1.41003E-07 | 3.05E-07 | 6.53E-08 | 6.66E-11 | 5.13E-09 | 6.45E-12   |
| 0.03098006                  | 0.099995          | 7.48E-09 | 2.08E-06 | 2.44752E-08 | 4.68E-11 | 1.41956E-07 | 3.07E-07 | 7.25E-08 | 8.59E-11 | 7.62E-09 | 1.14E-11   |
| 0.03579241                  | 0.099994          | 1.05E-08 | 2.49E-06 | 2.45369E-08 | 6.53E-11 | 1.42314E-07 | 3.07E-07 | 7.96E-08 | 1.07E-10 | 1.06E-08 | 1.83E-11   |
| 0.04060477                  | 0.099994          | 1.40E-08 | 2.89E-06 | 2.45621E-08 | 8.69E-11 | 1.4246E-07  | 3.08E-07 | 8.67E-08 | 1.29E-10 | 1.42E-08 | 2.78E-11   |
| 0.05581332                  | 0.099991          | 2.85E-08 | 4.16E-06 | 2.46014E-08 | 1.76E-10 | 1.42688E-07 | 3.08E-07 | 1.09E-07 | 2.08E-10 | 2.90E-08 | 8.03E-11   |
| 0.07102186                  | 0.099988          | 4.82E-08 | 5.42E-06 | 2.46069E-08 | 2.96E-10 | 1.4272E-07  | 3.08E-07 | 1.31E-07 | 3.01E-10 | 4.90E-08 | 1.74E-10   |
| 0.08623041                  | 0.099986          | 7.32E-08 | 6.68E-06 | 2.46172E-08 | 4.45E-10 | 1.4278E-07  | 3.08E-07 | 1.53E-07 | 4.08E-10 | 7.43E-08 | 3.20E-10   |
| 0.10143895                  | 0.099983          | 1.03E-07 | 7.94E-06 | 2.46316E-08 | 6.25E-10 | 1.42863E-07 | 3.09E-07 | 1.75E-07 | 5.28E-10 | 1.05E-07 | 5.31E-10   |
| 0.15031025                  | 0.099975          | 2.34E-07 | 1.19E-05 | 2.46764E-08 | 1.40E-09 | 1.43123E-07 | 3.09E-07 | 2.44E-07 | 1.01E-09 | 2.39E-07 | 1.78E-09   |
| 0.19918155                  | 0.099966          | 4.17E-07 | 1.59E-05 | 2.47181E-08 | 2.47E-09 | 1.43365E-07 | 3.10E-07 | 3.13E-07 | 1.62E-09 | 4.26E-07 | 4.19E-09   |
| 0.24805285                  | 0.099958          | 6.51E-07 | 1.98E-05 | 2.4759E-08  | 3.84E-09 | 1.43602E-07 | 3.10E-07 | 3.81E-07 | 2.37E-09 | 6.65E-07 | 8.14E-09   |
| 0.29692415                  | 0.099949          | 9.34E-07 | 2.36E-05 | 2.48003E-08 | 5.48E-09 | 1.43842E-07 | 3.11E-07 | 4.47E-07 | 3.26E-09 | 9.57E-07 | 1.40E-08   |
| 0.34579545                  | 0.099941          | 1.27E-06 | 2.74E-05 | 2.48411E-08 | 7.40E-09 | 1.44078E-07 | 3.11E-07 | 5.13E-07 | 4.27E-09 | 1.30E-06 | 2.21E-08   |
| 0.58620242                  | 0.0999            | 3.57E-06 | 4.53E-05 | 2.50335E-08 | 2.07E-08 | 1.45194E-07 | 3.14E-07 | 8.25E-07 | 1.10E-08 | 3.71E-06 | 1.06E-07   |
| 0.8266094                   | 0.099858          | 6.92E-06 | 6.21E-05 | 2.52127E-08 | 3.99E-08 | 1.46234E-07 | 3.16E-07 | 1.12E-06 | 2.05E-08 | 7.27E-06 | 2.90E-07   |
| 1.06701637                  | 0.099817          | 1.12E-05 | 7.78E-05 | 2.53816E-08 | 6.44E-08 | 1.47213E-07 | 3.18E-07 | 1.39E-06 | 3.25E-08 | 1.19E-05 | 6.11E-07   |
| 1.30742334                  | 0.099776          | 1.63E-05 | 9.26E-05 | 2.55399E-08 | 9.37E-08 | 1.48131E-07 | 3.20E-07 | 1.65E-06 | 4.67E-08 | 1.75E-05 | 1.10E-06   |
| 1.54783031                  | 0.099735          | 2.22E-05 | 0.000106 | 2.56882E-08 | 1.27E-07 | 1.48991E-07 | 3.22E-07 | 1.89E-06 | 6.28E-08 | 2.41E-05 | 1.78E-06   |
| 2.07983119                  | 0.099644          | 3.73E-05 | 0.000134 | 2.59841E-08 | 2.14E-07 | 1.50708E-07 | 3.26E-07 | 2.37E-06 | 1.04E-07 | 4.18E-05 | 4.10E-06   |
| 2.61183207                  | 0.099552          | 5.49E-05 | 0.000158 | 2.62408E-08 | 3.15E-07 | 1.52197E-07 | 3.29E-07 | 2.78E-06 | 1.52E-07 | 6.31E-05 | 7.72E-06   |
| 3.14383295                  | 0.099461          | 7.43E-05 | 0.000178 | 2.64632E-08 | 4.25E-07 | 1.53487E-07 | 3.32E-07 | 3.14E-06 | 2.05E-07 | 8.77E-05 | 1.28E-05   |
| 3.67583383                  | 0.09937           | 9.49E-05 | 0.000196 | 2.6656E-08  | 5.43E-07 | 1.54605E-07 | 3.34E-07 | 3.45E-06 | 2.61E-07 | 0.000115 | 1.94E-05   |
| 4.20783471                  | 0.09928           | 0.000116 | 0.000211 | 2.68231E-08 | 6.65E-07 | 1.55574E-07 | 3.36E-07 | 3.71E-06 | 3.19E-07 | 0.000145 | 2.77E-05   |
| 4.73983559                  | 0.099189          | 0.000138 | 0.000224 | 2.6968E-08  | 7.89E-07 | 1.56414E-07 | 3.38E-07 | 3.94E-06 | 3.77E-07 | 0.000177 | 3.77E-05   |
| 5.83705301                  | 0.099002          | 0.000183 | 0.000246 | 2.72088E-08 | 1.05E-06 | 1.57811E-07 | 3.41E-07 | 4.33E-06 | 4.99E-07 | 0.000248 | 6.37E-05   |
| 6.93427044                  | 0.098815          | 0.000226 | 0.000262 | 2.73883E-08 | 1.29E-06 | 1.58852E-07 | 3.43E-07 | 4.61E-06 | 6.16E-07 | 0.000325 | 9.68E-05   |
| 8.03148786                  | 0.098629          | 0.000267 | 0.000274 | 2.75219E-08 | 1.53E-06 | 1.59627E-07 | 3.45E-07 | 4.81E-06 | 7.25E-07 | 0.000406 | 0.00013672 |

|            |          |          |          |             |          |             |           |          |          |          |            |
|------------|----------|----------|----------|-------------|----------|-------------|-----------|----------|----------|----------|------------|
| 9.12870528 | 0.098443 | 0.000305 | 0.000283 | 2.76213E-08 | 1.74E-06 | 1.60204E-07 | 3.46E-07  | 4.96E-06 | 8.26E-07 | 0.00049  | 0.00018299 |
| 10.2259227 | 0.098258 | 0.000339 | 0.000289 | 2.76953E-08 | 1.93E-06 | 1.60633E-07 | 3.47E-07  | 5.07E-06 | 9.18E-07 | 0.000577 | 0.00023503 |
| 11.3231401 | 0.098072 | 0.000369 | 0.000294 | 2.77504E-08 | 2.11E-06 | 1.60952E-07 | 3.48E-07  | 5.15E-06 | 1.00E-06 | 0.000665 | 0.00029229 |
| 13.1665062 | 0.097762 | 0.000413 | 0.000299 | 2.78135E-08 | 2.36E-06 | 1.61318E-07 | 3.48E-07  | 5.23E-06 | 1.12E-06 | 0.000815 | 0.00039868 |
| 15.0098722 | 0.097453 | 0.000448 | 0.000301 | 2.7852E-08  | 2.56E-06 | 1.61542E-07 | 3.49E-07  | 5.28E-06 | 1.21E-06 | 0.000967 | 0.00051567 |
| 16.8532382 | 0.097144 | 0.000475 | 0.000302 | 2.78753E-08 | 2.71E-06 | 1.61676E-07 | 3.49E-07  | 5.30E-06 | 1.28E-06 | 0.00112  | 0.00064104 |
| 18.6966042 | 0.096837 | 0.000496 | 0.000303 | 2.78893E-08 | 2.83E-06 | 1.61758E-07 | 3.49E-07  | 5.30E-06 | 1.34E-06 | 0.001273 | 0.00077297 |
| 20.5399703 | 0.09653  | 0.000513 | 0.000302 | 2.78977E-08 | 2.93E-06 | 1.61807E-07 | 3.50E-07  | 5.30E-06 | 1.38E-06 | 0.001427 | 0.00090997 |
| 22.3833363 | 0.096225 | 0.000525 | 0.000302 | 2.79029E-08 | 3.00E-06 | 1.61837E-07 | 3.50E-07  | 5.29E-06 | 1.42E-06 | 0.00158  | 0.00105083 |
| 25.7673675 | 0.095667 | 0.00054  | 0.000301 | 2.79083E-08 | 3.08E-06 | 1.61868E-07 | 3.50E-07  | 5.27E-06 | 1.46E-06 | 0.001861 | 0.00131633 |
| 29.1513987 | 0.095111 | 0.000548 | 0.000299 | 2.79102E-08 | 3.13E-06 | 1.61879E-07 | 3.50E-07  | 5.24E-06 | 1.48E-06 | 0.00214  | 0.00158734 |
| 32.5354299 | 0.09456  | 0.000551 | 0.000297 | 2.79105E-08 | 3.15E-06 | 1.61881E-07 | 3.50E-07  | 5.21E-06 | 1.49E-06 | 0.002417 | 0.0018612  |
| 35.9194611 | 0.094011 | 0.000552 | 0.000296 | 2.79107E-08 | 3.15E-06 | 1.61882E-07 | 3.50E-07  | 5.18E-06 | 1.49E-06 | 0.002693 | 0.00213624 |
| 39.3034923 | 0.093466 | 0.000552 | 0.000294 | 2.79109E-08 | 3.15E-06 | 1.61883E-07 | 3.50E-07  | 5.15E-06 | 1.49E-06 | 0.002968 | 0.00241137 |
| 42.6875235 | 0.092923 | 0.00055  | 0.000292 | 2.79108E-08 | 3.14E-06 | 1.61883E-07 | 3.50E-07  | 5.12E-06 | 1.49E-06 | 0.003241 | 0.00268592 |
| 48.0198746 | 0.092075 | 0.000547 | 0.00029  | 2.79111E-08 | 3.12E-06 | 1.61885E-07 | 3.50E-07  | 5.08E-06 | 1.48E-06 | 0.003667 | 0.00311637 |
| 53.3522257 | 0.091235 | 0.000542 | 0.000287 | 2.79112E-08 | 3.09E-06 | 1.61885E-07 | 3.50E-07  | 5.03E-06 | 1.46E-06 | 0.00409  | 0.00354362 |
| 58.6845768 | 0.090402 | 0.000537 | 0.000284 | 2.79107E-08 | 3.07E-06 | 1.61882E-07 | 3.50E-07  | 4.98E-06 | 1.45E-06 | 0.004509 | 0.00396738 |
| 64.0169279 | 0.089577 | 0.000533 | 0.000282 | 2.79107E-08 | 3.04E-06 | 1.61882E-07 | 3.50E-07  | 4.94E-06 | 1.44E-06 | 0.004925 | 0.00438746 |
| 69.349279  | 0.088759 | 0.000528 | 0.000279 | 2.79112E-08 | 3.01E-06 | 1.61885E-07 | 3.50E-07  | 4.89E-06 | 1.42E-06 | 0.005336 | 0.00480375 |
| 74.6816301 | 0.087949 | 0.000523 | 0.000277 | 2.7911E-08  | 2.99E-06 | 1.61884E-07 | 3.50E-07  | 4.85E-06 | 1.41E-06 | 0.005744 | 0.00521623 |
| 85.813436  | 0.086282 | 0.000513 | 0.000271 | 2.79108E-08 | 2.93E-06 | 1.61883E-07 | 3.50E-07  | 4.76E-06 | 1.39E-06 | 0.006583 | 0.00606527 |
| 96.9452419 | 0.084646 | 0.000503 | 0.000266 | 2.79104E-08 | 2.87E-06 | 1.6188E-07  | 3.50E-07  | 4.67E-06 | 1.36E-06 | 0.007406 | 0.00689823 |
| 108.077048 | 0.083041 | 0.000494 | 0.000261 | 2.79107E-08 | 2.82E-06 | 1.61882E-07 | 3.50E-07  | 4.58E-06 | 1.33E-06 | 0.008213 | 0.0077154  |
| 119.208854 | 0.081467 | 0.000484 | 0.000256 | 2.79114E-08 | 2.77E-06 | 1.61886E-07 | 3.50E-07  | 4.49E-06 | 1.31E-06 | 0.009006 | 0.00851708 |
| 130.34066  | 0.079922 | 0.000475 | 0.000251 | 2.79111E-08 | 2.71E-06 | 1.61884E-07 | 3.50E-07  | 4.41E-06 | 1.28E-06 | 0.009783 | 0.00930356 |
| 188.918711 | 0.072265 | 0.00043  | 0.000227 | 2.79065E-08 | 2.45E-06 | 1.61858E-07 | 3.50E-07  | 3.98E-06 | 1.16E-06 | 0.013636 | 0.01320277 |
| 247.496763 | 0.065341 | 0.000389 | 0.000206 | 2.78717E-08 | 2.22E-06 | 1.61656E-07 | 3.49E-07  | 3.60E-06 | 1.05E-06 | 0.01712  | 0.01672815 |
| 306.074815 | 0.059081 | 0.000351 | 0.000186 | 2.78577E-08 | 2.01E-06 | 1.61574E-07 | 3.49E-07  | 3.26E-06 | 9.49E-07 | 0.02027  | 0.01991577 |
| 364.652867 | 0.053421 | 0.000318 | 0.000168 | 2.7915E-08  | 1.81E-06 | 1.61907E-07 | 3.50E-07  | 2.94E-06 | 8.58E-07 | 0.023118 | 0.02279807 |
| 423.230918 | 0.048302 | 0.000287 | 0.000152 | 2.80077E-08 | 1.64E-06 | 1.62444E-07 | 3.51E-07  | 2.66E-06 | 7.76E-07 | 0.025694 | 0.02540427 |
| 567.418671 | 0.03771  | 0.000224 | 0.000119 | 2.80168E-08 | 1.28E-06 | 1.62497E-07 | 3.51E-07  | 2.08E-06 | 6.05E-07 | 0.031024 | 0.03079772 |
| 711.606423 | 0.029448 | 0.000175 | 9.26E-05 | 2.74449E-08 | 1.00E-06 | 1.59181E-07 | 3.44E-07  | 1.62E-06 | 4.73E-07 | 0.035182 | 0.03500498 |
| 855.794175 | 0.022994 | 0.000137 | 7.23E-05 | 2.63672E-08 | 7.81E-07 | 1.5293E-07  | 3.30E-07  | 1.27E-06 | 3.69E-07 | 0.038429 | 0.03829128 |
| 999.981927 | 0.017951 | 0.000107 | 5.65E-05 | 2.54373E-08 | 6.09E-07 | 1.47536E-07 | 3.19E-07  | 9.90E-07 | 2.88E-07 | 0.040967 | 0.04085895 |
| 1144.16968 | 0.014013 | 8.33E-05 | 4.41E-05 | 2.56964E-08 | 4.76E-07 | 1.49039E-07 | 3.22E-07  | 7.72E-07 | 2.25E-07 | 0.042948 | 0.04286417 |
| 1288.35743 | 0.010939 | 6.51E-05 | 3.44E-05 | 2.81743E-08 | 3.71E-07 | 1.63411E-07 | 3.53E-07  | 6.03E-07 | 1.76E-07 | 0.044495 | 0.04442941 |
| 1433.5286  | 0.008526 | 5.07E-05 | 2.68E-05 | 3.29823E-08 | 2.89E-07 | 1.91297E-07 | 4.13E-07  | 4.70E-07 | 1.37E-07 | 0.045709 | 0.04565833 |
| 1578.69977 | 0.006645 | 3.95E-05 | 2.09E-05 | 3.86297E-08 | 2.26E-07 | 2.24052E-07 | 4.84E-07  | 3.66E-07 | 1.07E-07 | 0.046656 | 0.04661599 |
| 1723.87093 | 0.005179 | 3.08E-05 | 1.63E-05 | 4.2061E-08  | 1.76E-07 | 2.43954E-07 | 5.27E-07  | 2.85E-07 | 8.31E-08 | 0.047393 | 0.04736242 |
| 1869.0421  | 0.004036 | 2.40E-05 | 1.27E-05 | 3.92578E-08 | 1.37E-07 | 2.27695E-07 | 4.92E-07  | 2.23E-07 | 6.48E-08 | 0.047969 | 0.0479443  |
| 2014.21327 | 0.003146 | 1.87E-05 | 9.90E-06 | 2.63142E-08 | 1.07E-07 | 1.52622E-07 | 3.30E-07  | 1.74E-07 | 5.06E-08 | 0.048417 | 0.04839801 |
| 2162.15516 | 0.002439 | 1.45E-05 | 7.69E-06 | 1.71847E-10 | 8.30E-08 | 9.96713E-10 | 2.15E-09  | 1.35E-07 | 3.92E-08 | 0.048773 | 0.04875809 |
| 2310.09705 | 0.00189  | 1.13E-05 | 5.97E-06 | 0           | 6.44E-08 | 0           | -4.71E-07 | 1.05E-07 | 3.05E-08 | 0.049049 | 0.04903788 |
| 2310.25343 | 0.00189  | 1.13E-05 | 5.72E-06 | 0           | 6.43E-08 | 0           | -3.16E-07 | 9.88E-08 | 3.04E-08 | 0.04905  | 0.04903814 |

|            |          |          |          |             |          |             |           |          |          |         |            |
|------------|----------|----------|----------|-------------|----------|-------------|-----------|----------|----------|---------|------------|
| 2310.37472 | 0.00189  | 1.13E-05 | 5.42E-06 | 0           | 6.43E-08 | 0           | -1.20E-07 | 9.40E-08 | 3.04E-08 | 0.04905 | 0.04903834 |
| 2310.496   | 0.00189  | 1.12E-05 | 5.17E-06 | 3.58391E-09 | 6.41E-08 | 2.07867E-08 | 4.49E-08  | 9.01E-08 | 3.03E-08 | 0.04905 | 0.04903855 |
| 2310.61729 | 0.001889 | 1.12E-05 | 5.03E-06 | 1.2071E-08  | 6.40E-08 | 7.00117E-08 | 1.51E-07  | 8.78E-08 | 3.02E-08 | 0.04905 | 0.04903875 |
| 2310.73857 | 0.001889 | 1.12E-05 | 4.96E-06 | 1.7007E-08  | 6.38E-08 | 9.86405E-08 | 2.13E-07  | 8.68E-08 | 3.01E-08 | 0.04905 | 0.04903895 |

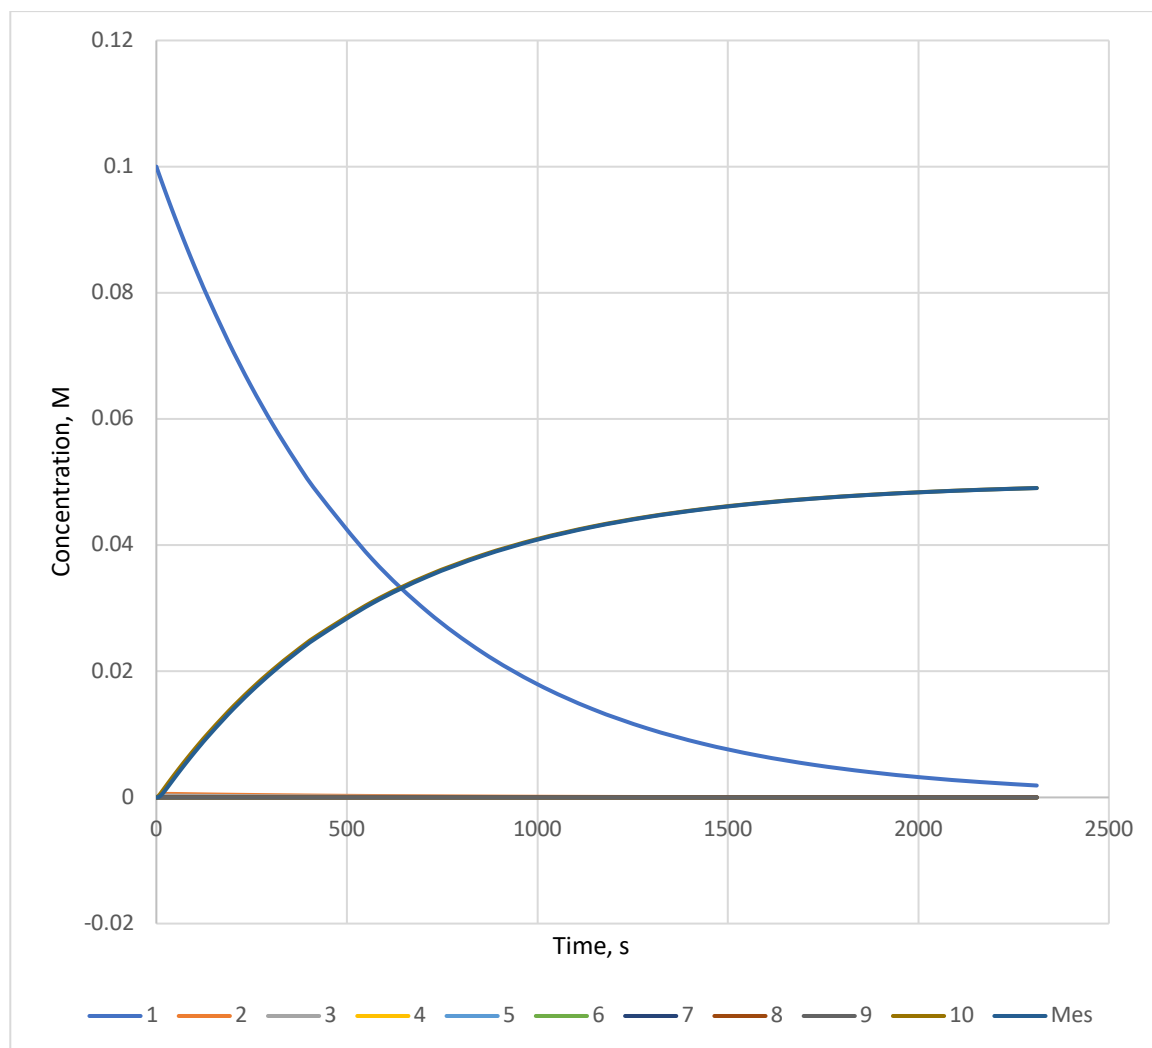

**Figure S13.** Calculated time dependence of concentrations of **1, 2, Mes** and all intermediates (Table S17).

**Table S18.** Calculated initial rates for thermolysis of **1** (0.01- 0.1 M) without added mesitylene at 50 °C (from Table S17).

| c( <b>1</b> ), M | Initial rate, s <sup>-1</sup> |
|------------------|-------------------------------|
| 0.01             | 1.71·10 <sup>-4</sup>         |
| 0.025            | 4.26·10 <sup>-4</sup>         |
| 0.05             | 8.56·10 <sup>-4</sup>         |
| 0.1              | 1.71·10 <sup>-3</sup>         |

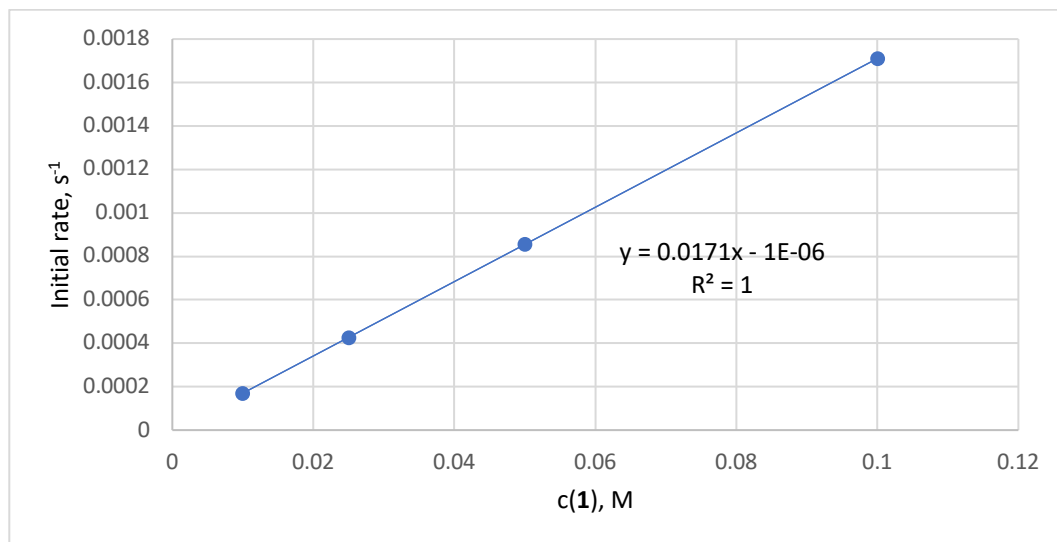

**Figure S14.** Calculated plot of initial rate vs concentration of **1** (Table S11).

**Table S19.** Calculated initial rates for thermolysis of **1** (0.1 M) in the presence of various concentration of mesitylene (0-1M) at 50 °C.

| c(mes), M | Initial rate, s <sup>-1</sup> |
|-----------|-------------------------------|
| 0         | 1.71·10 <sup>-3</sup>         |
| 0.05      | 1.71·10 <sup>-3</sup>         |
| 0.5       | 1.71·10 <sup>-3</sup>         |
| 1         | 1.71·10 <sup>-3</sup>         |

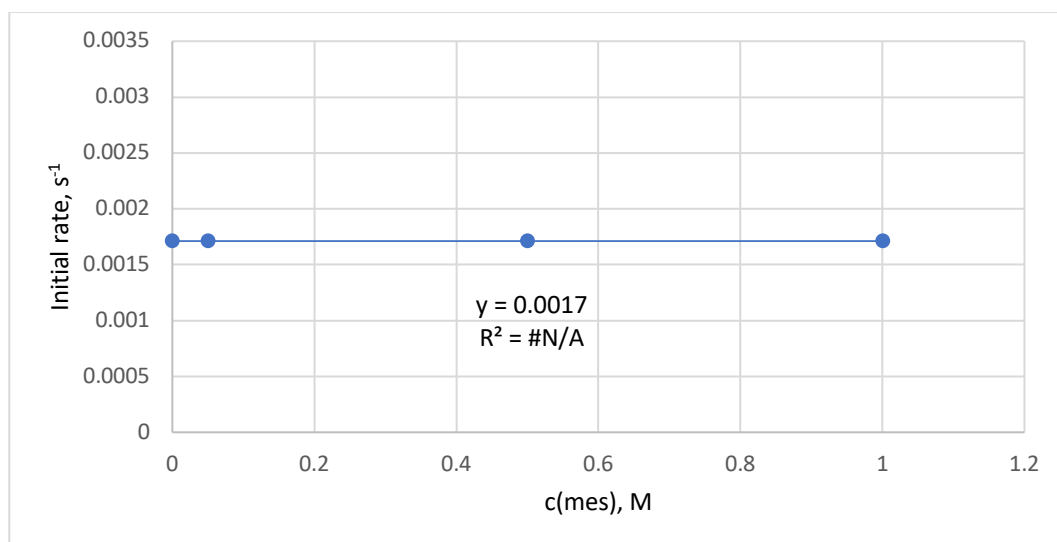

**Figure S15.** Calculated plot of initial rate vs concentration of mesitylene (Table S13).

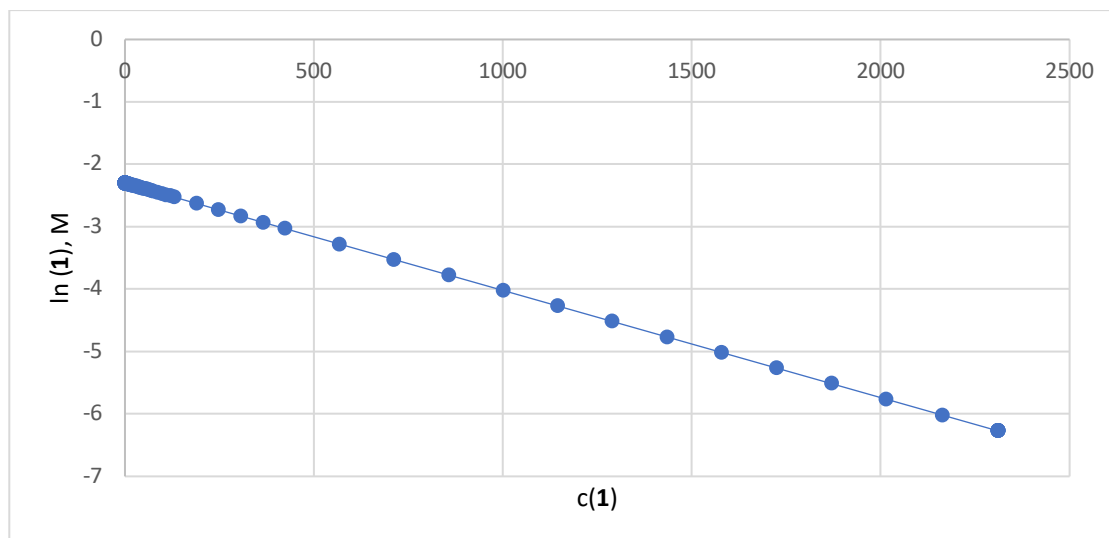

**Figure S16.** Calculated plot of  $\ln c(\mathbf{1})$  vs time for thermolysis of  $\mathbf{1}$  at  $50\text{ }^{\circ}\text{C}$  (Table S10).

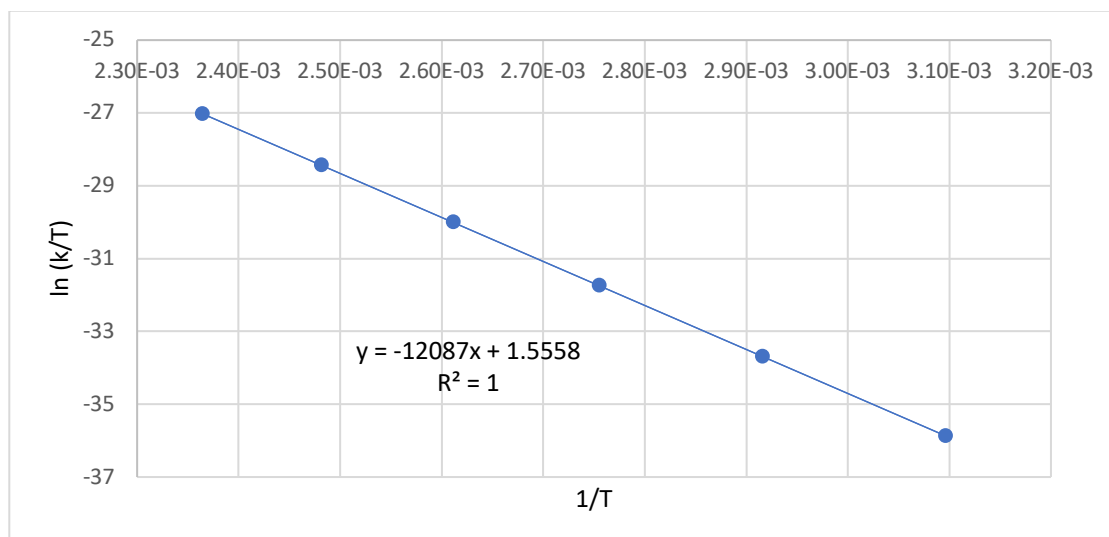

**Figure S17.** Calculated Eyring plot for determining the activation parameters  $\Delta H^{\ddagger}$  and  $\Delta S^{\ddagger}$  for thermolysis of  $\mathbf{1}$  at  $50\text{-}150\text{ }^{\circ}\text{C}$ .

**Table S20.** Calculated activation parameters for thermolysis of  $\mathbf{1}$  (Fig. S17).

| $\Delta H^{\ddagger}$ , kcal/mol | $\Delta S^{\ddagger}$ , cal/(mol·K) | $\Delta G_{323}^{\ddagger}$ , kcal/mol |
|----------------------------------|-------------------------------------|----------------------------------------|
| 24.00                            | 3.09                                | 23.01                                  |



## 9. $^1\text{H}$ and $^{13}\text{C}$ NMR spectra

$^1\text{H}$  NMR spectrum of mesitylene- $\text{d}_3$  in  $\text{CDCl}_3$ .

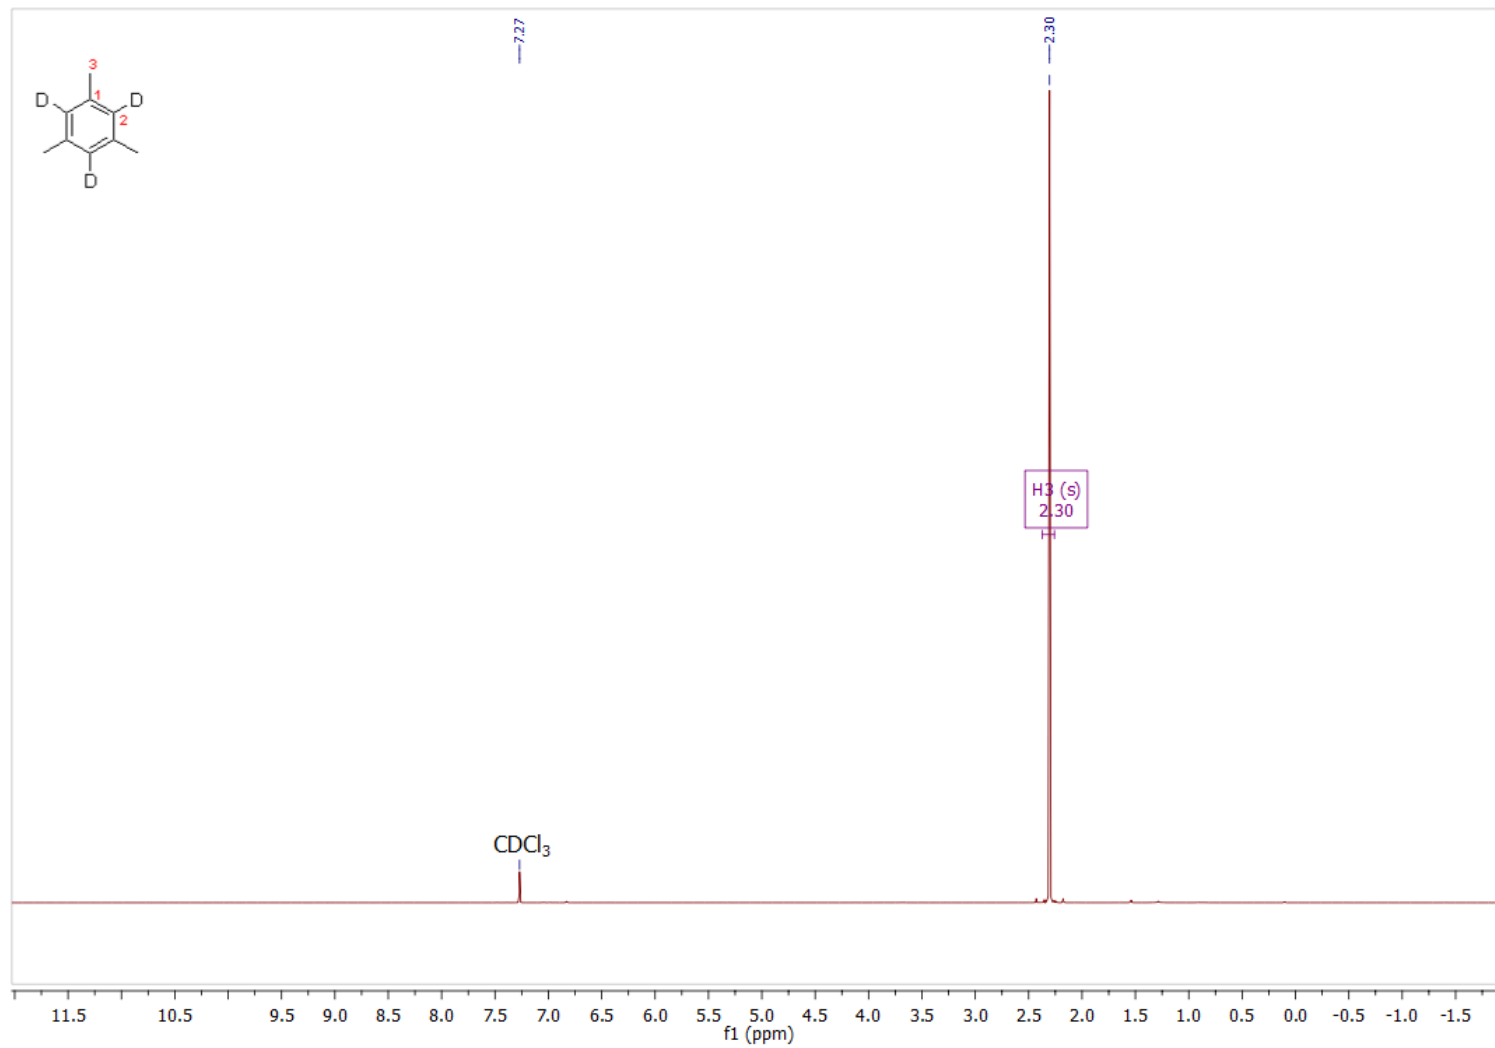

$^2\text{H}$  NMR spectrum of **mesitylene- $\text{d}_3$**  in  $\text{CHCl}_3$ .

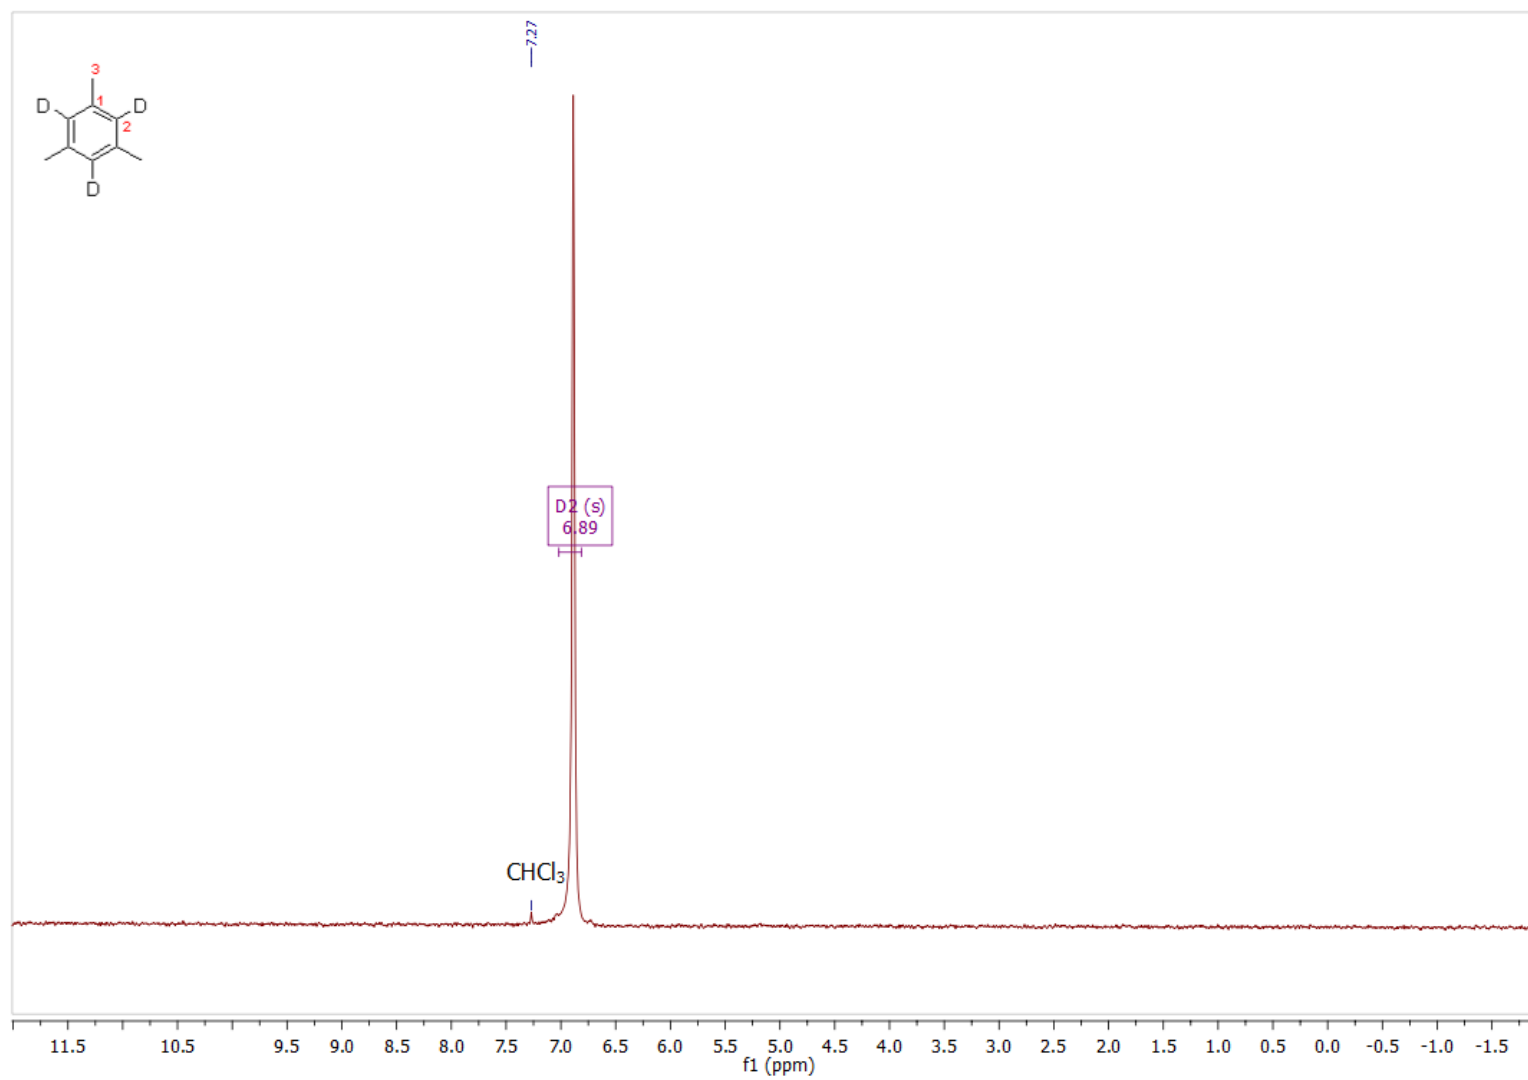

$^1\text{H}$  NMR spectrum of **mesitylene- $d_9$**  in  $\text{CDCl}_3$ .

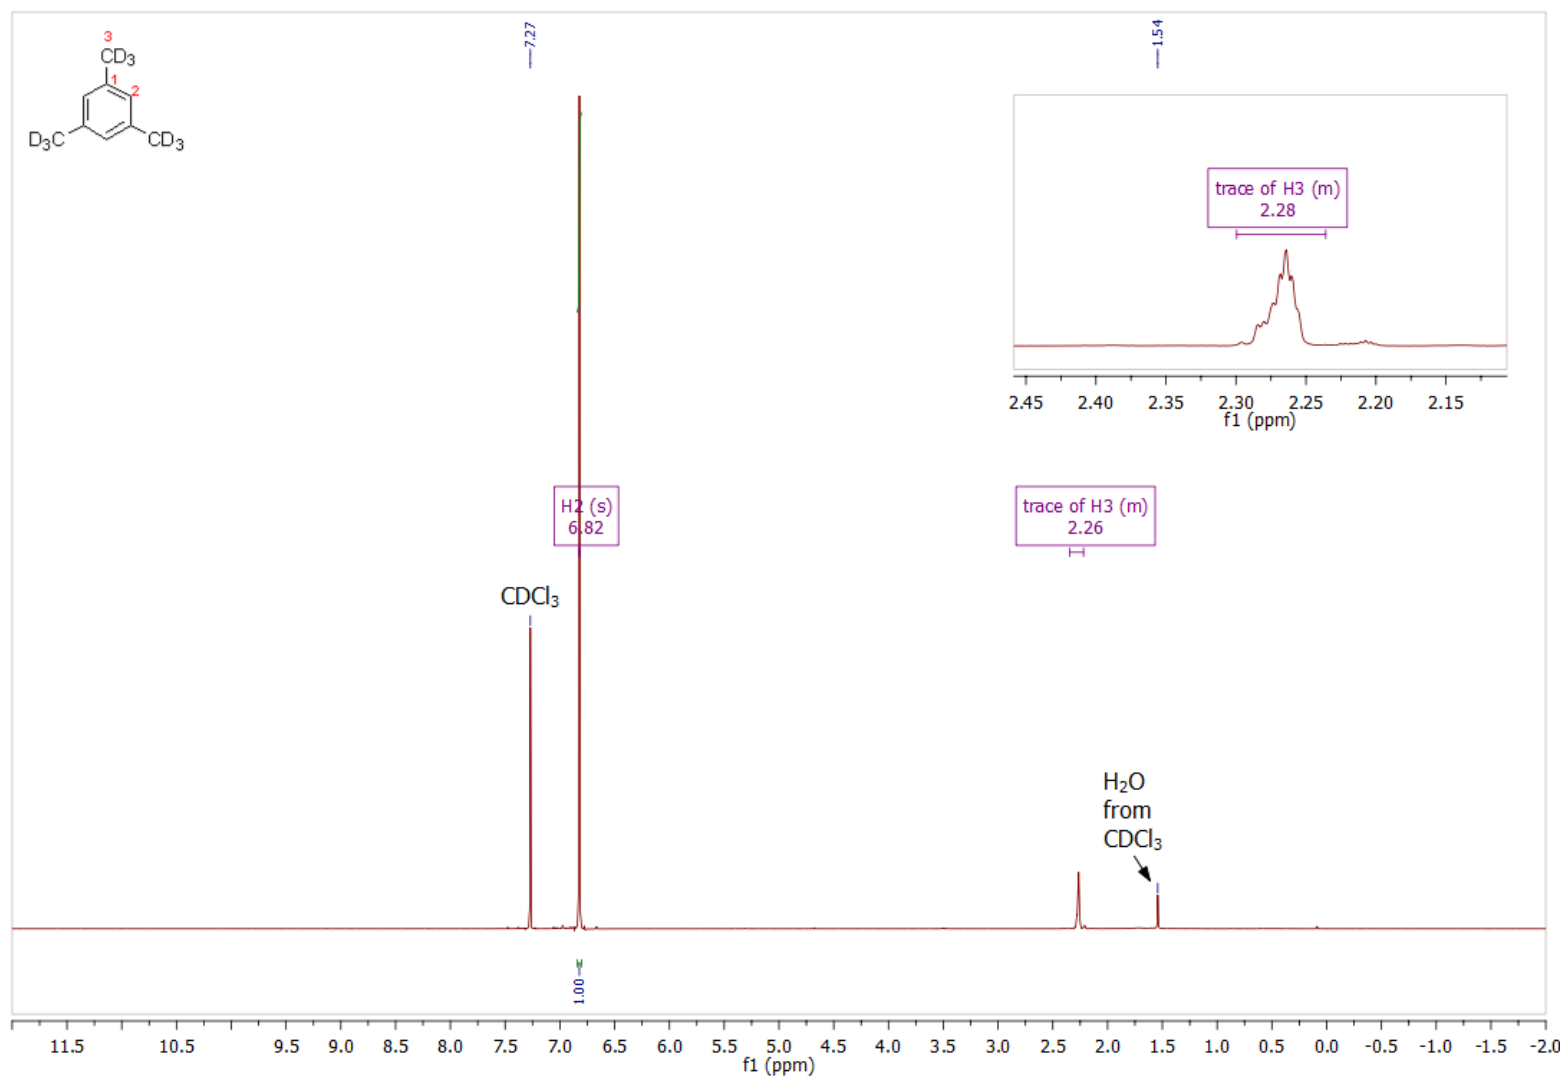

$^2\text{H}$  NMR spectrum of **mesitylene- $\text{d}_3$**  in  $\text{CHCl}_3$ .

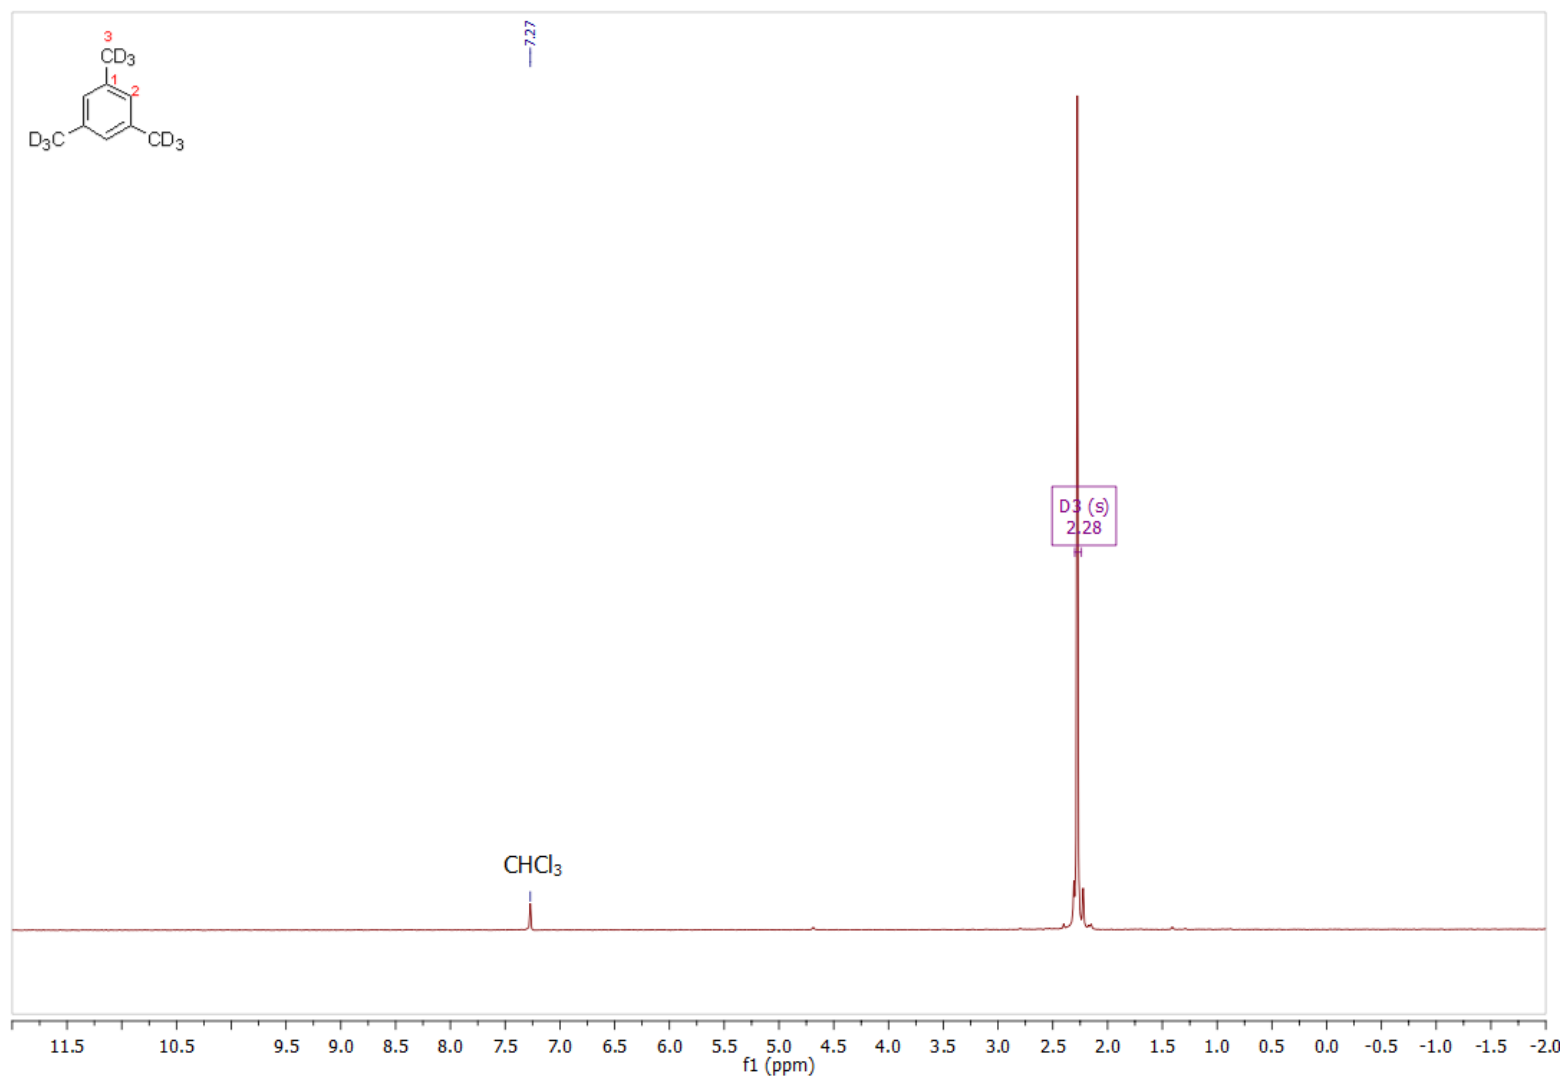

$^1\text{H}$  NMR spectrum of  $[\text{Cp}^*\text{Ir}(\eta^6\text{-mesitylene-}d_3)][\text{BF}_4]_2$  in TFA-d.

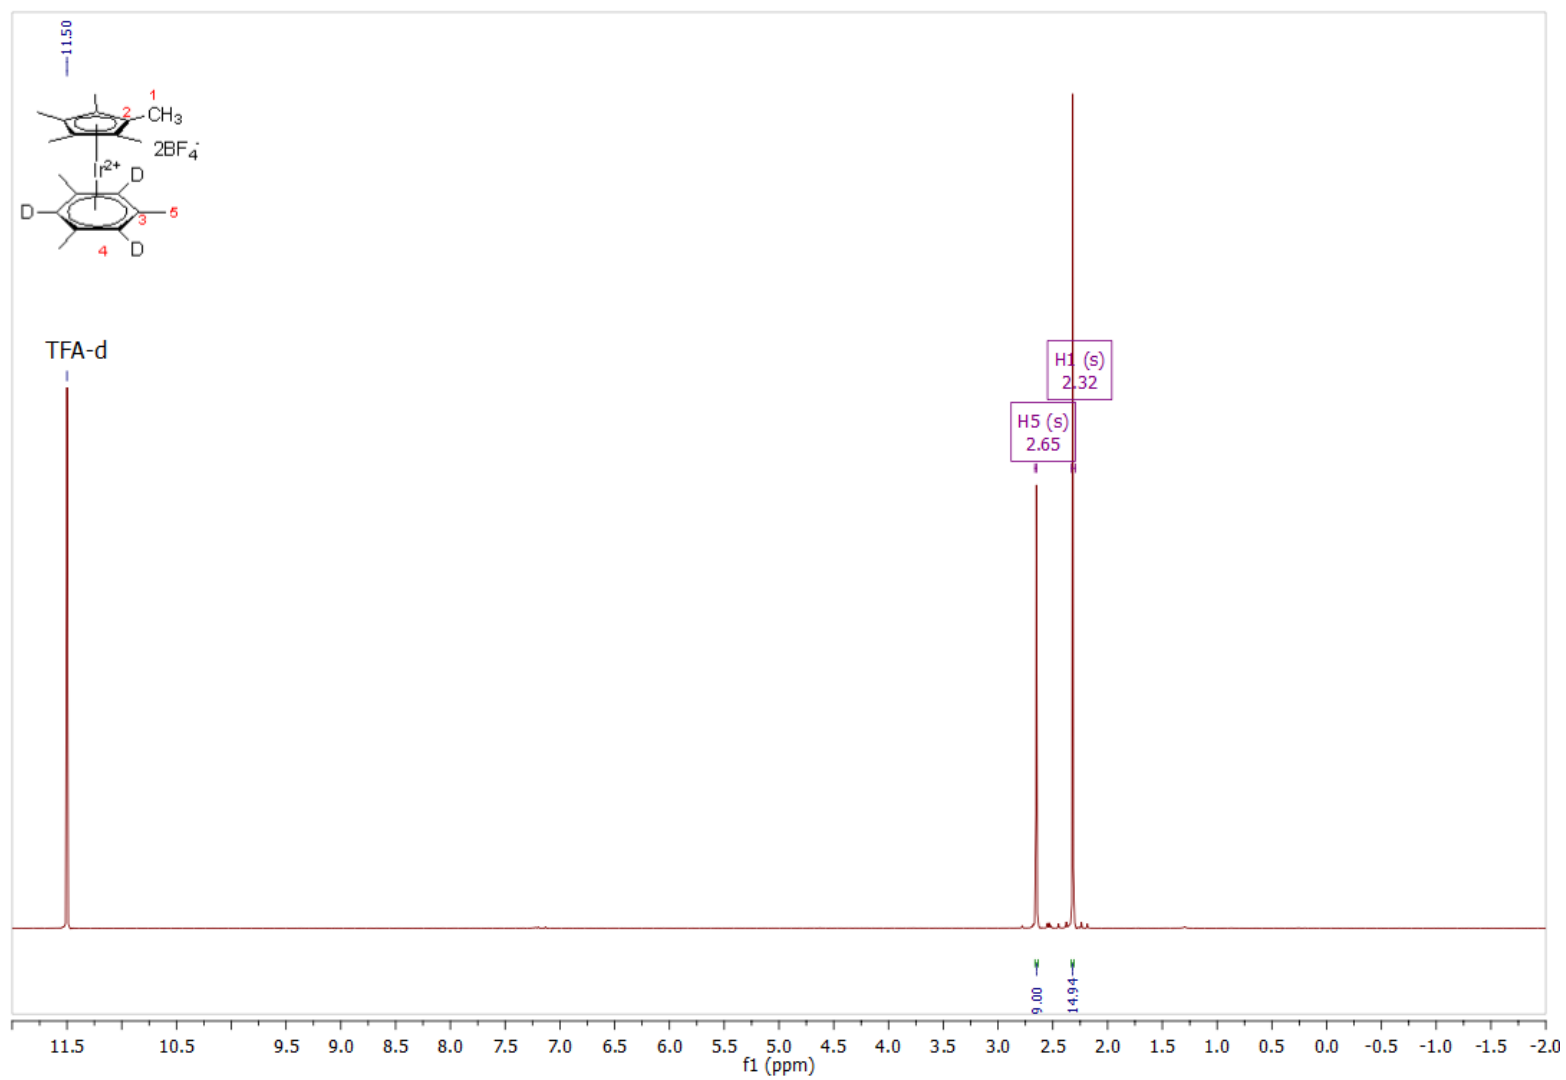

$^2\text{H}$  NMR spectrum of **mesitylene- $\text{d}_3$**  in TFA.

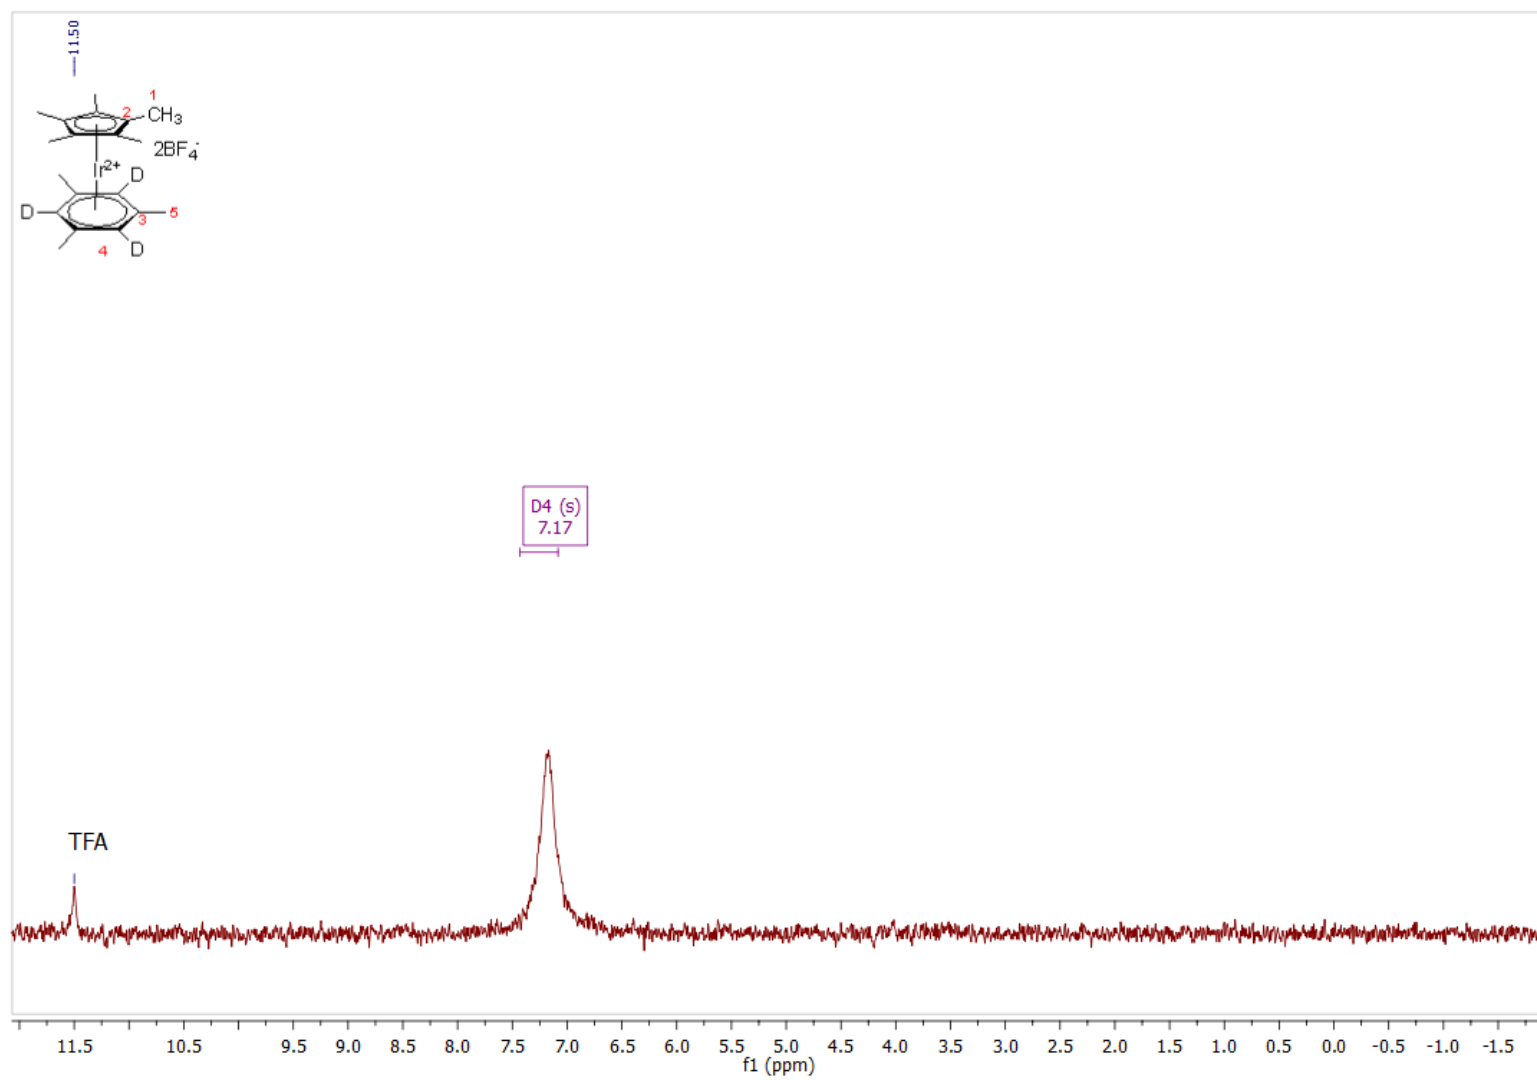

$^1\text{H}$  NMR spectrum of  $[\text{Cp}^*\text{Ir}(\eta^6\text{-mesitylene-}d_3)][\text{BF}_4]_2$  in TFA-d.

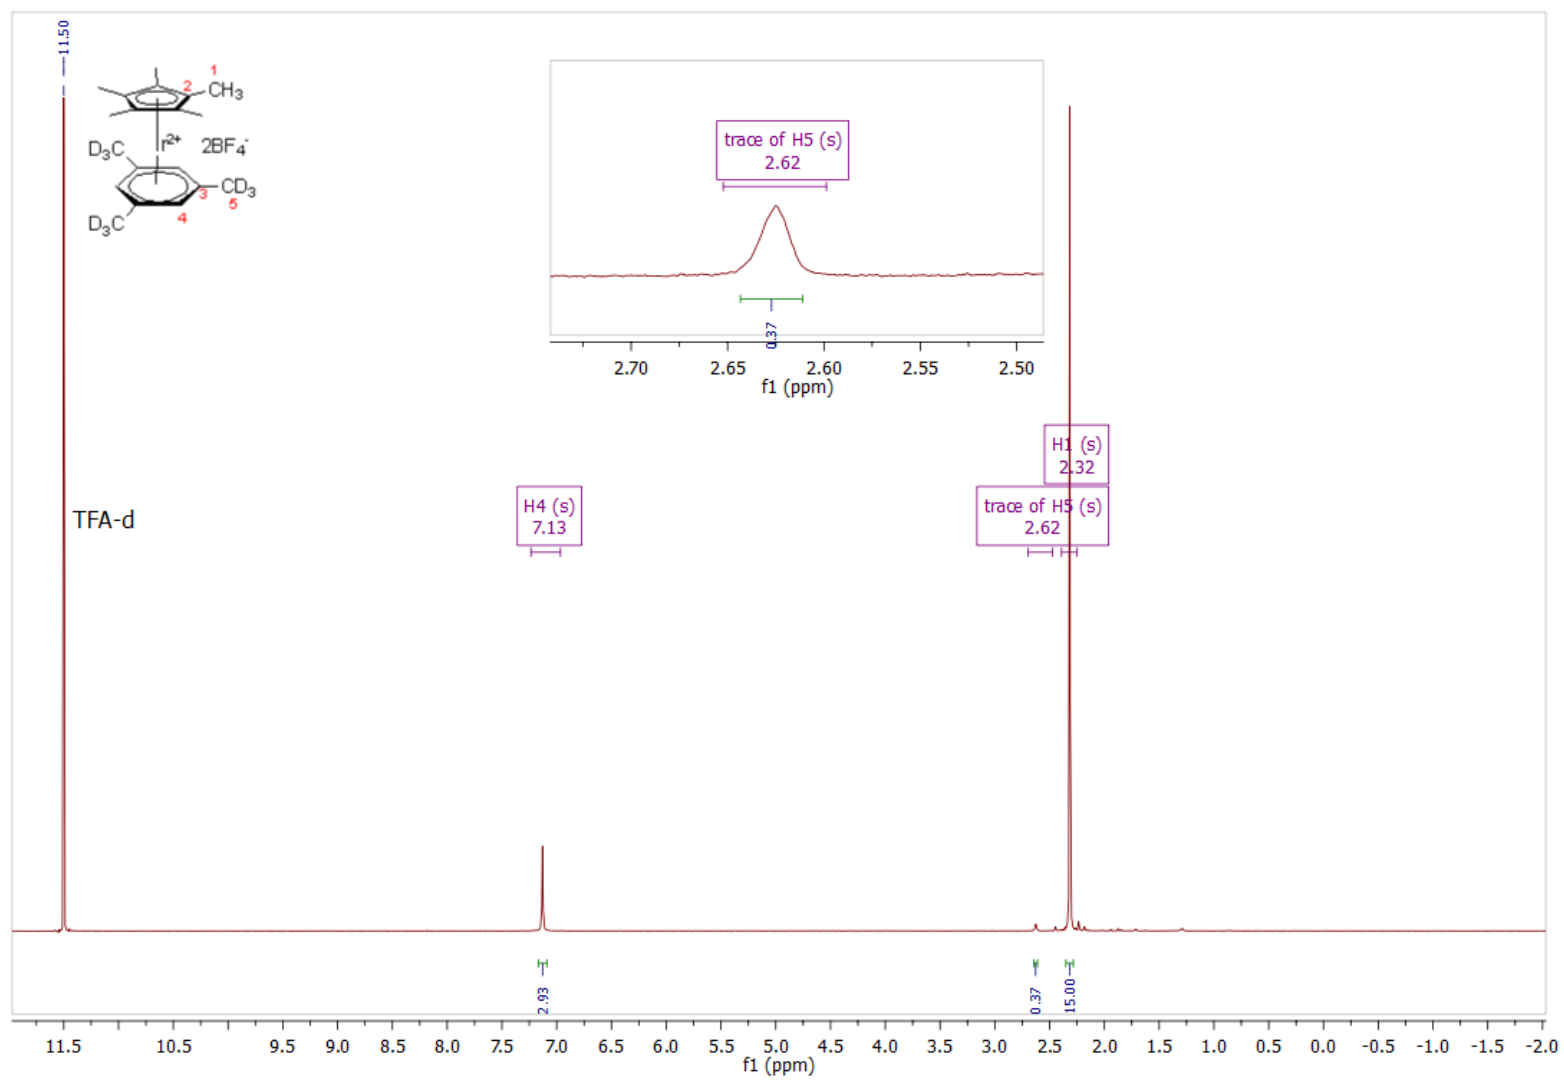

$^1\text{H}$  NMR spectrum of  $[\text{Cp}^*\text{Ir}(\eta^6\text{-C}_6\text{Me}_6)][\text{BF}_4]_2$  in TFA-d.

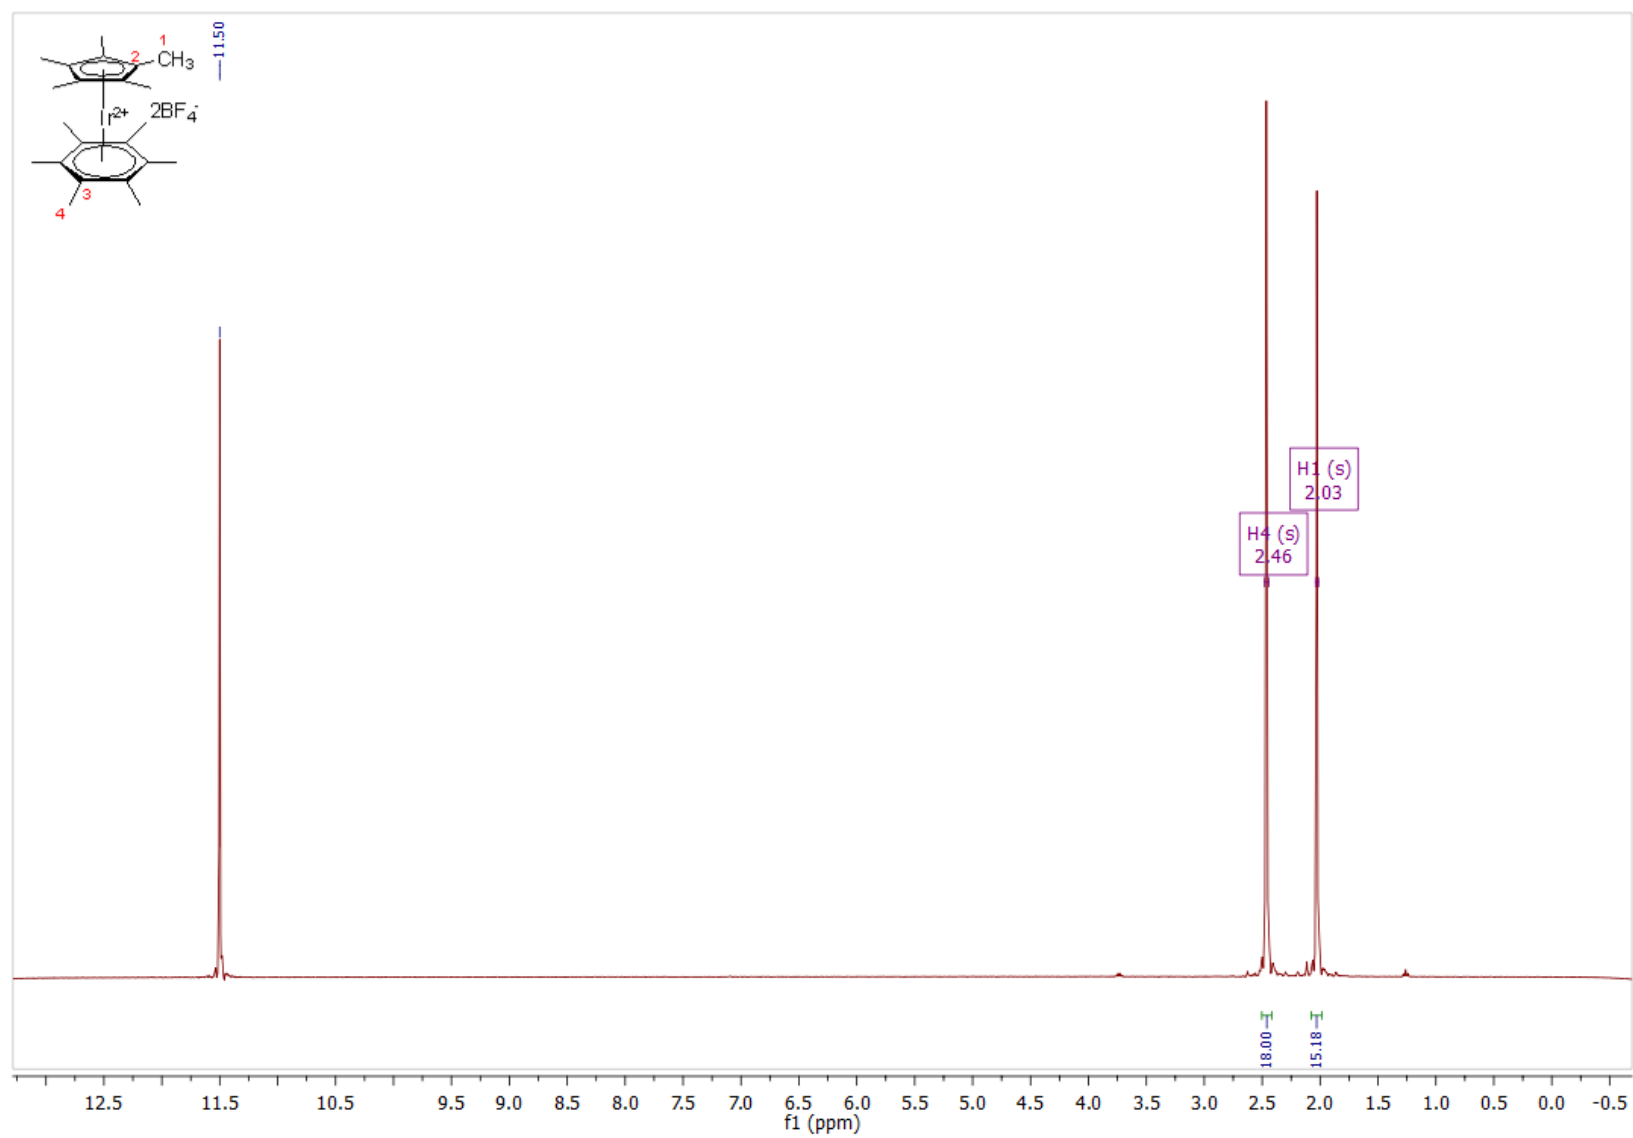



$^{13}\text{C}$  NMR spectrum of  $[\text{Cp}^*\text{Ir}(\eta^6\text{-C}_6\text{Me}_6)][\text{BF}_4]_2$  in TFA-d.

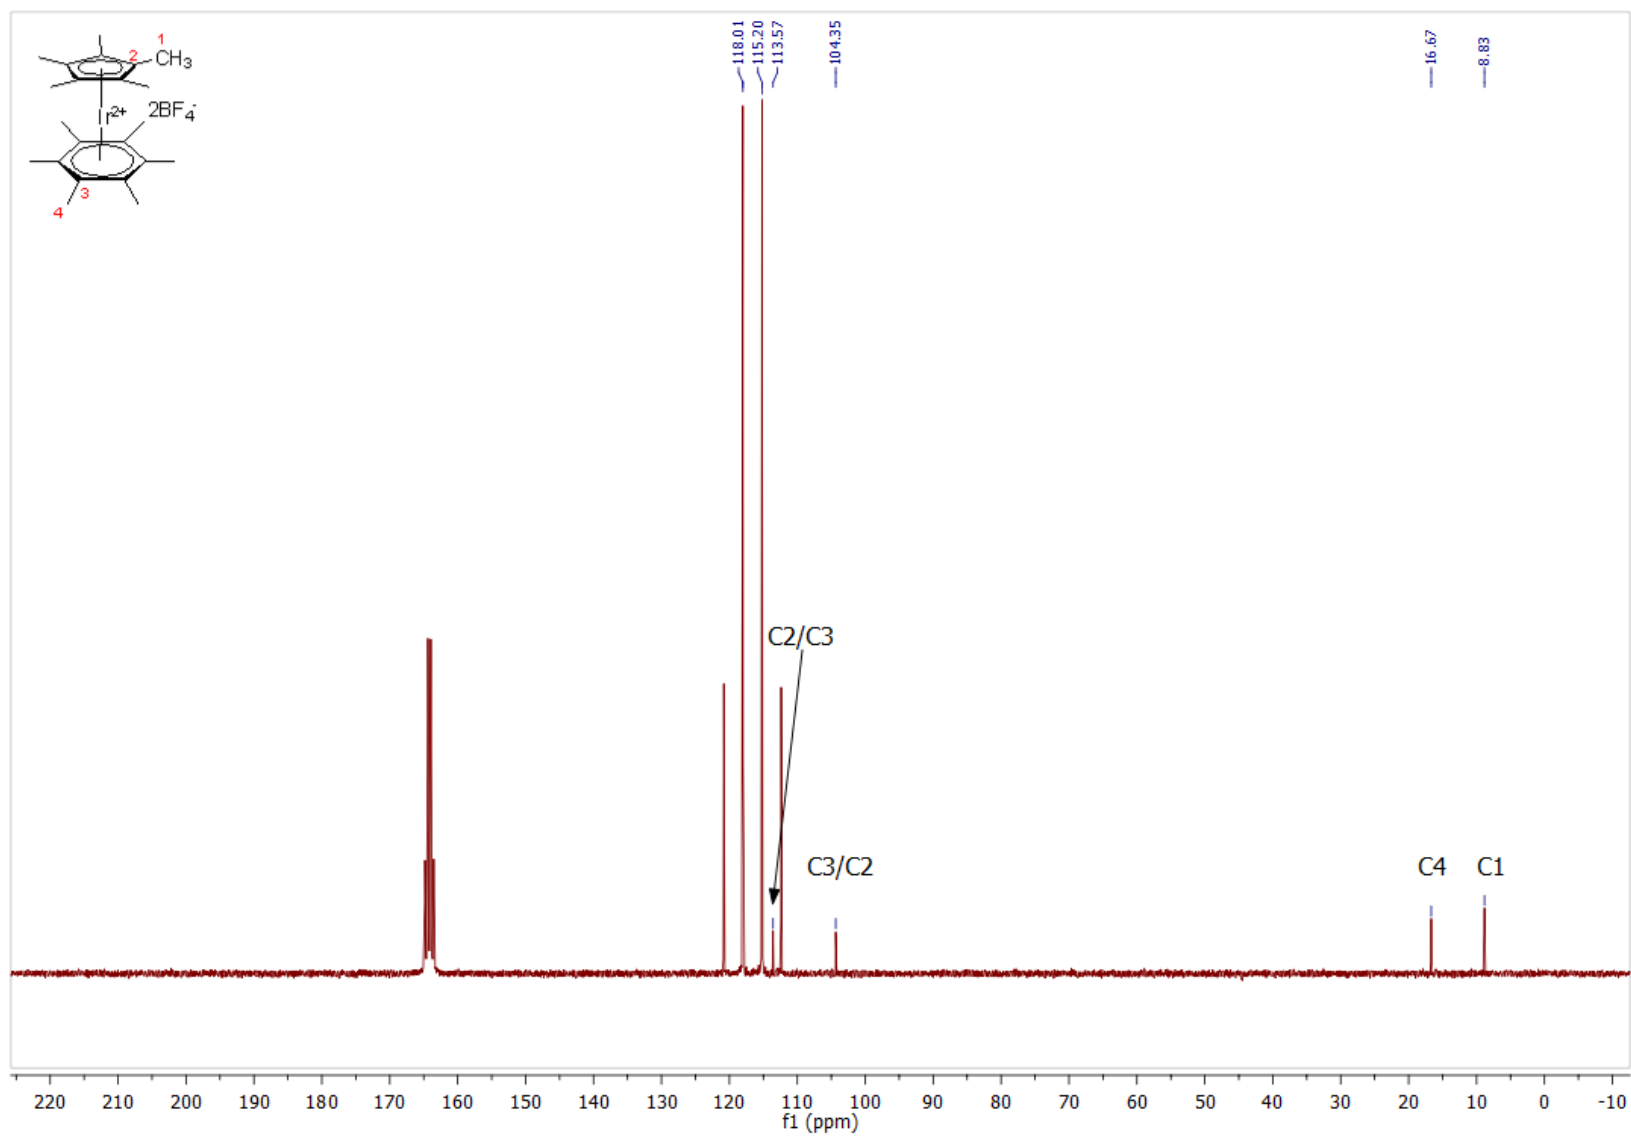

$^1\text{H}$  NMR spectrum of  $[\text{Cp}^*\text{Ir}(\eta^6\text{-naphthalene})][\text{BF}_4]_2$  in TFA-d.

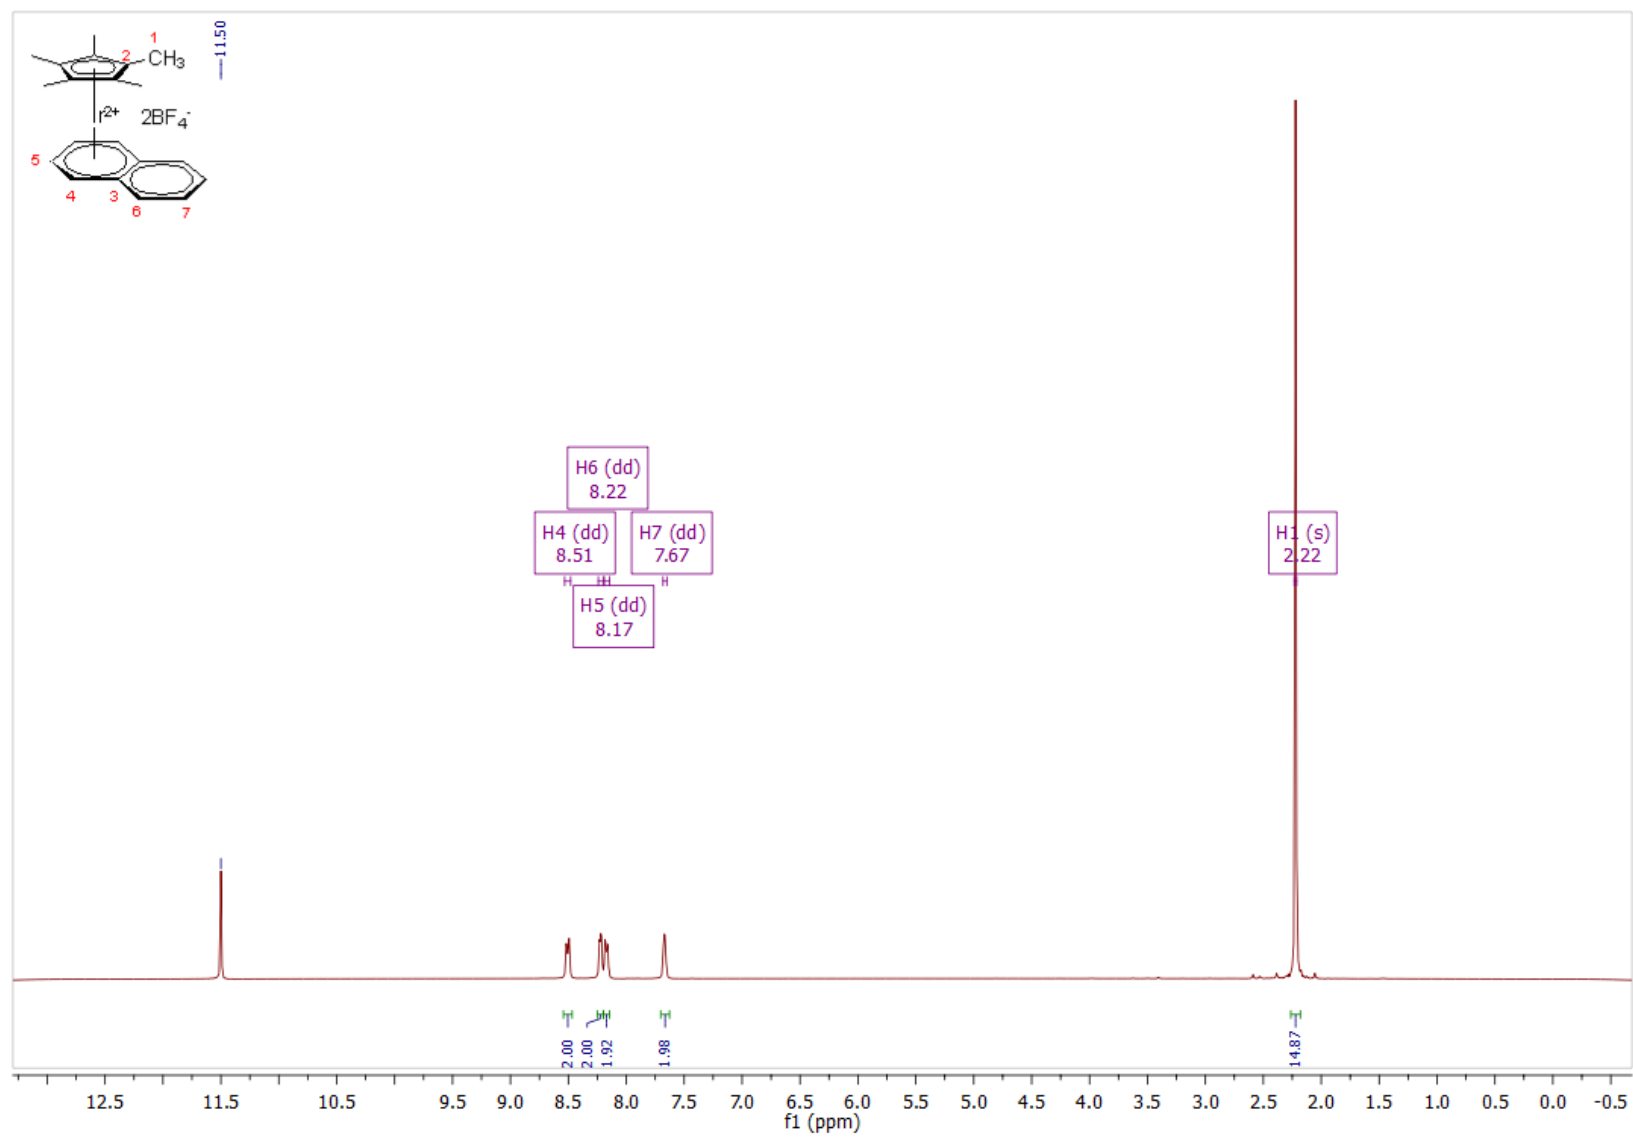

$^{13}\text{C}\{[{}^1\text{H}]\}$  NMR spectrum of  $[\text{Cp}^*\text{Ir}(\eta^6\text{-naphthalene})][\text{BF}_4]_2$  in TFA-d.

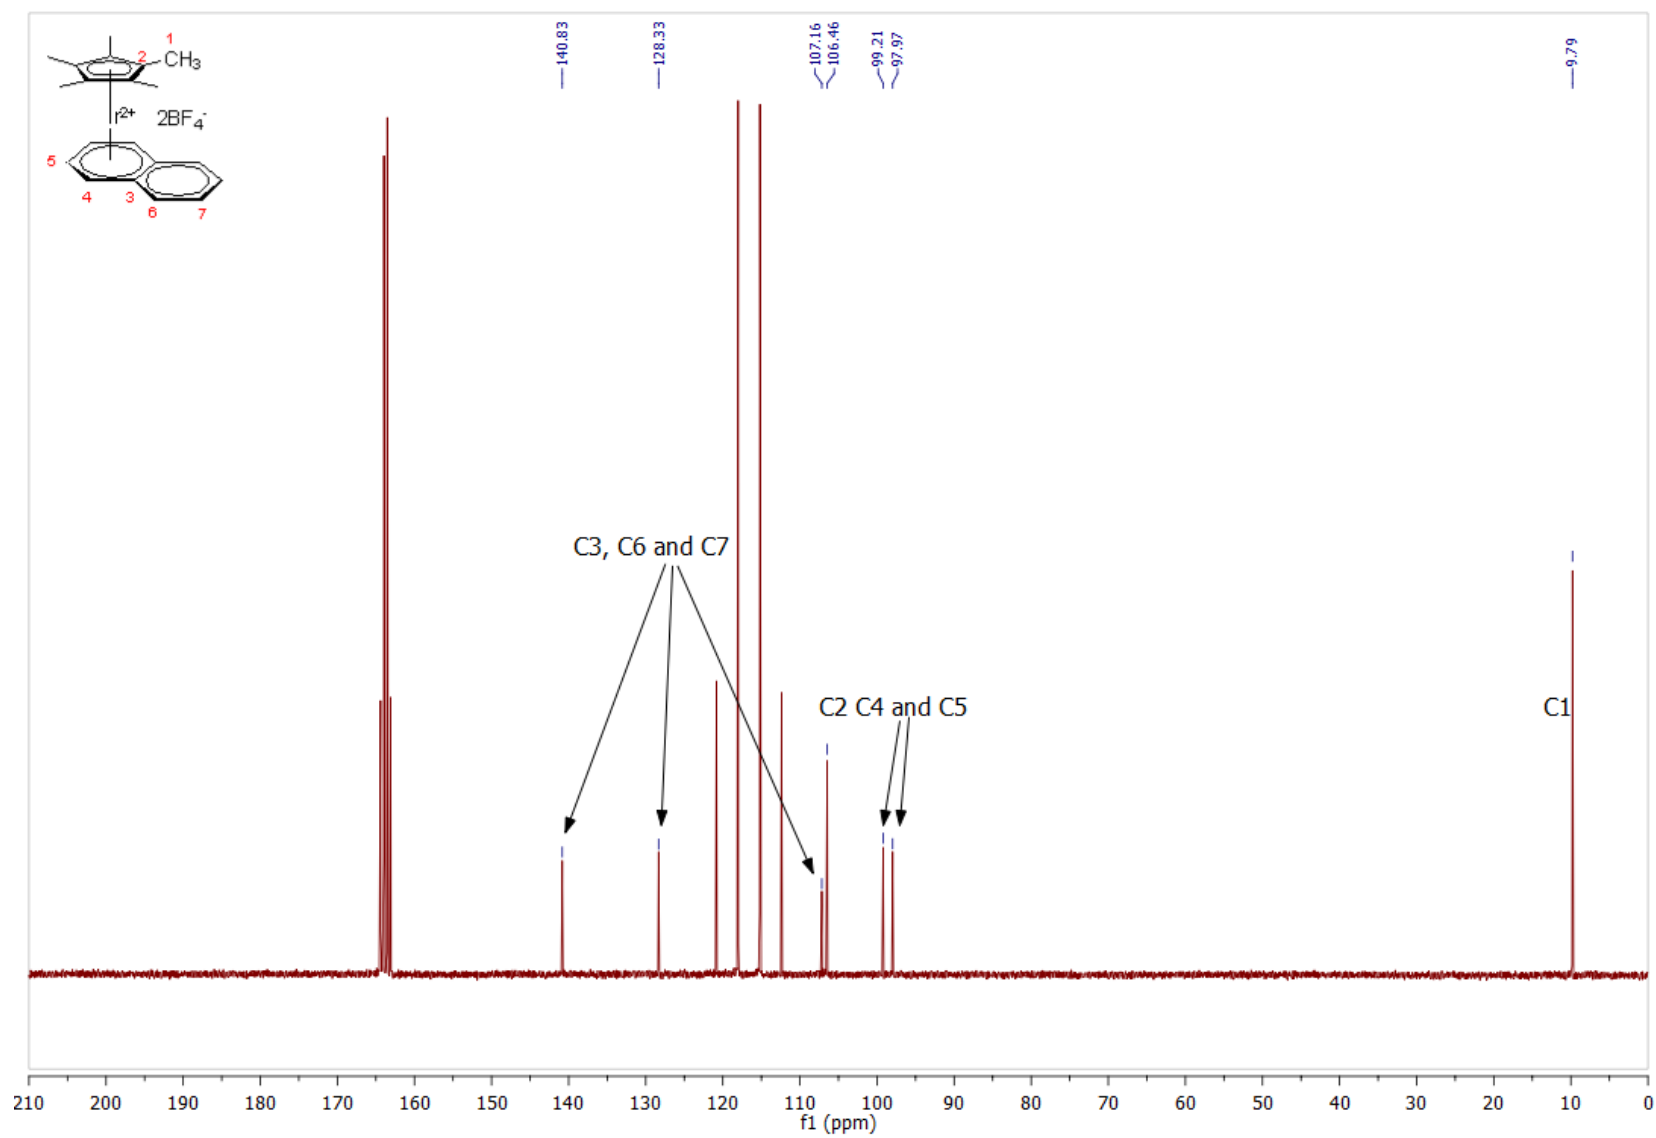

$^1\text{H}$  NMR spectrum of  $[\text{Cp}^*\text{Ir}(\eta^6\text{-2,6-dimethylnaphthalene})][\text{BF}_4]_2$  in TFA-d.

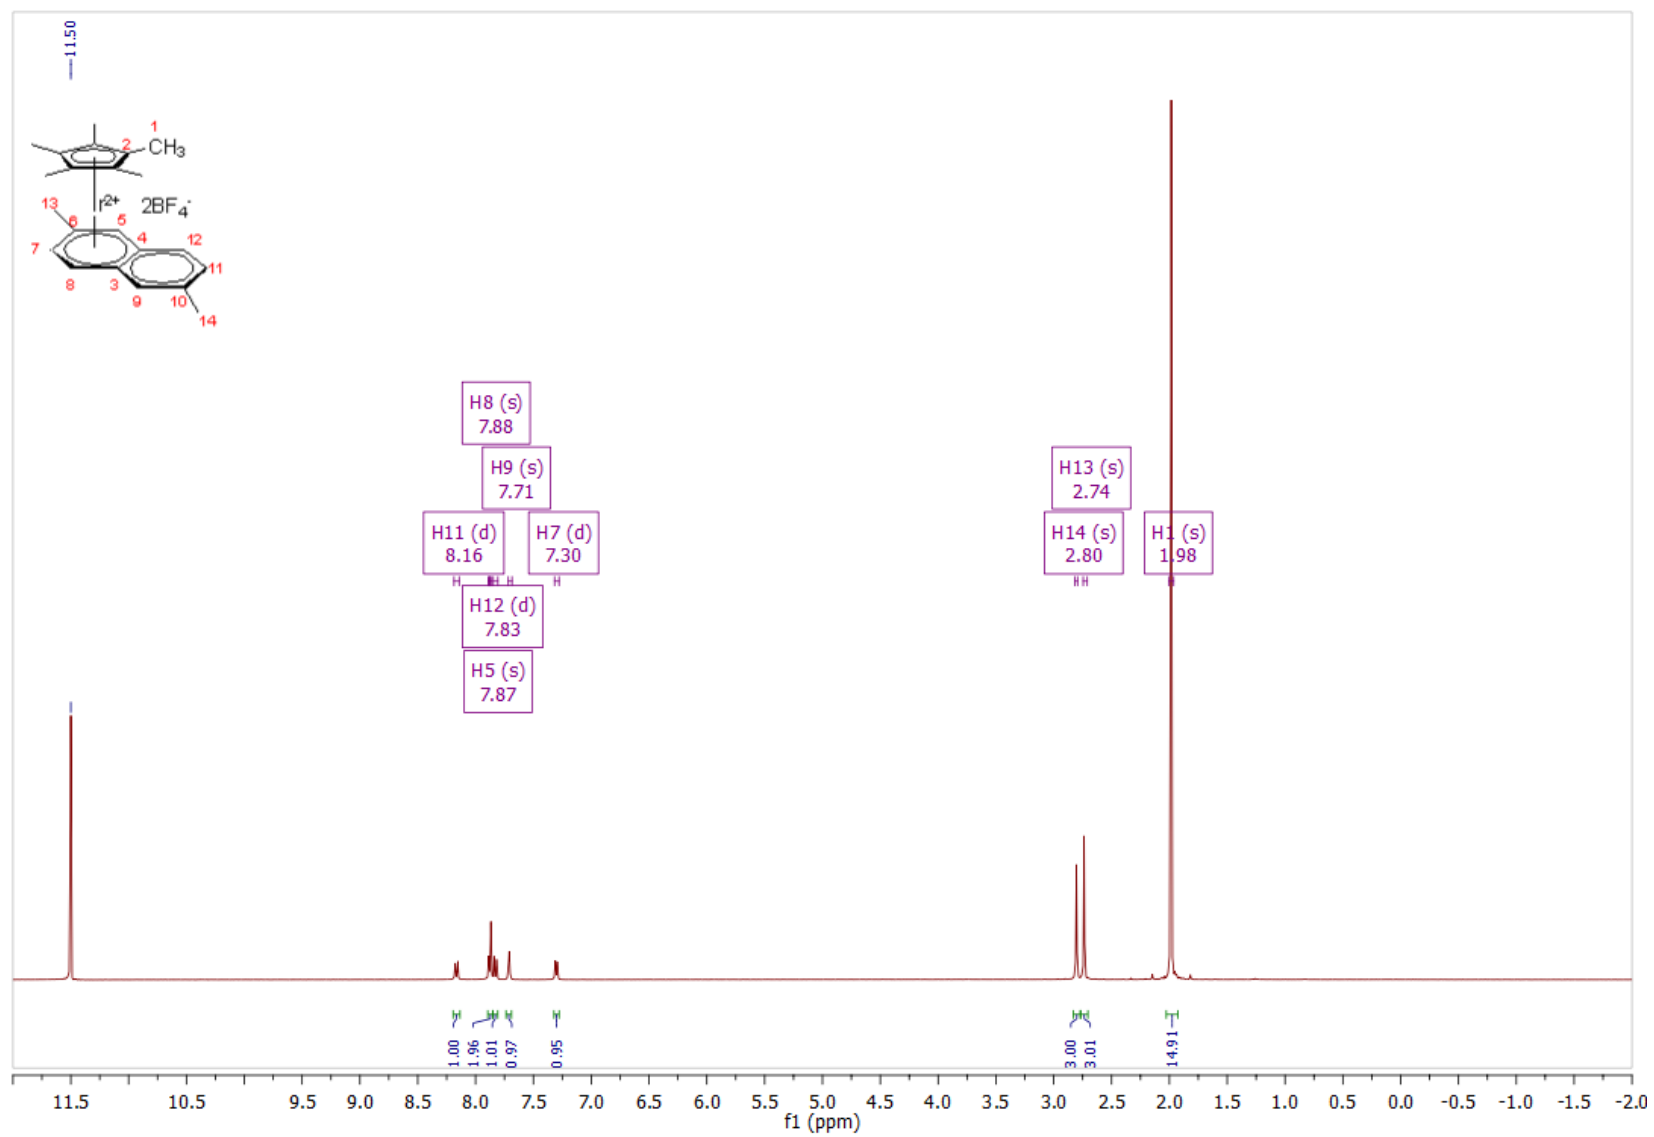

$^{13}\text{C}\{\{^1\text{H}\}\}$  NMR spectrum of  $[\text{Cp}^*\text{Ir}(\eta^6\text{-2,6-dimethylnaphthalene})][\text{BF}_4]_2$  in TFA-d.

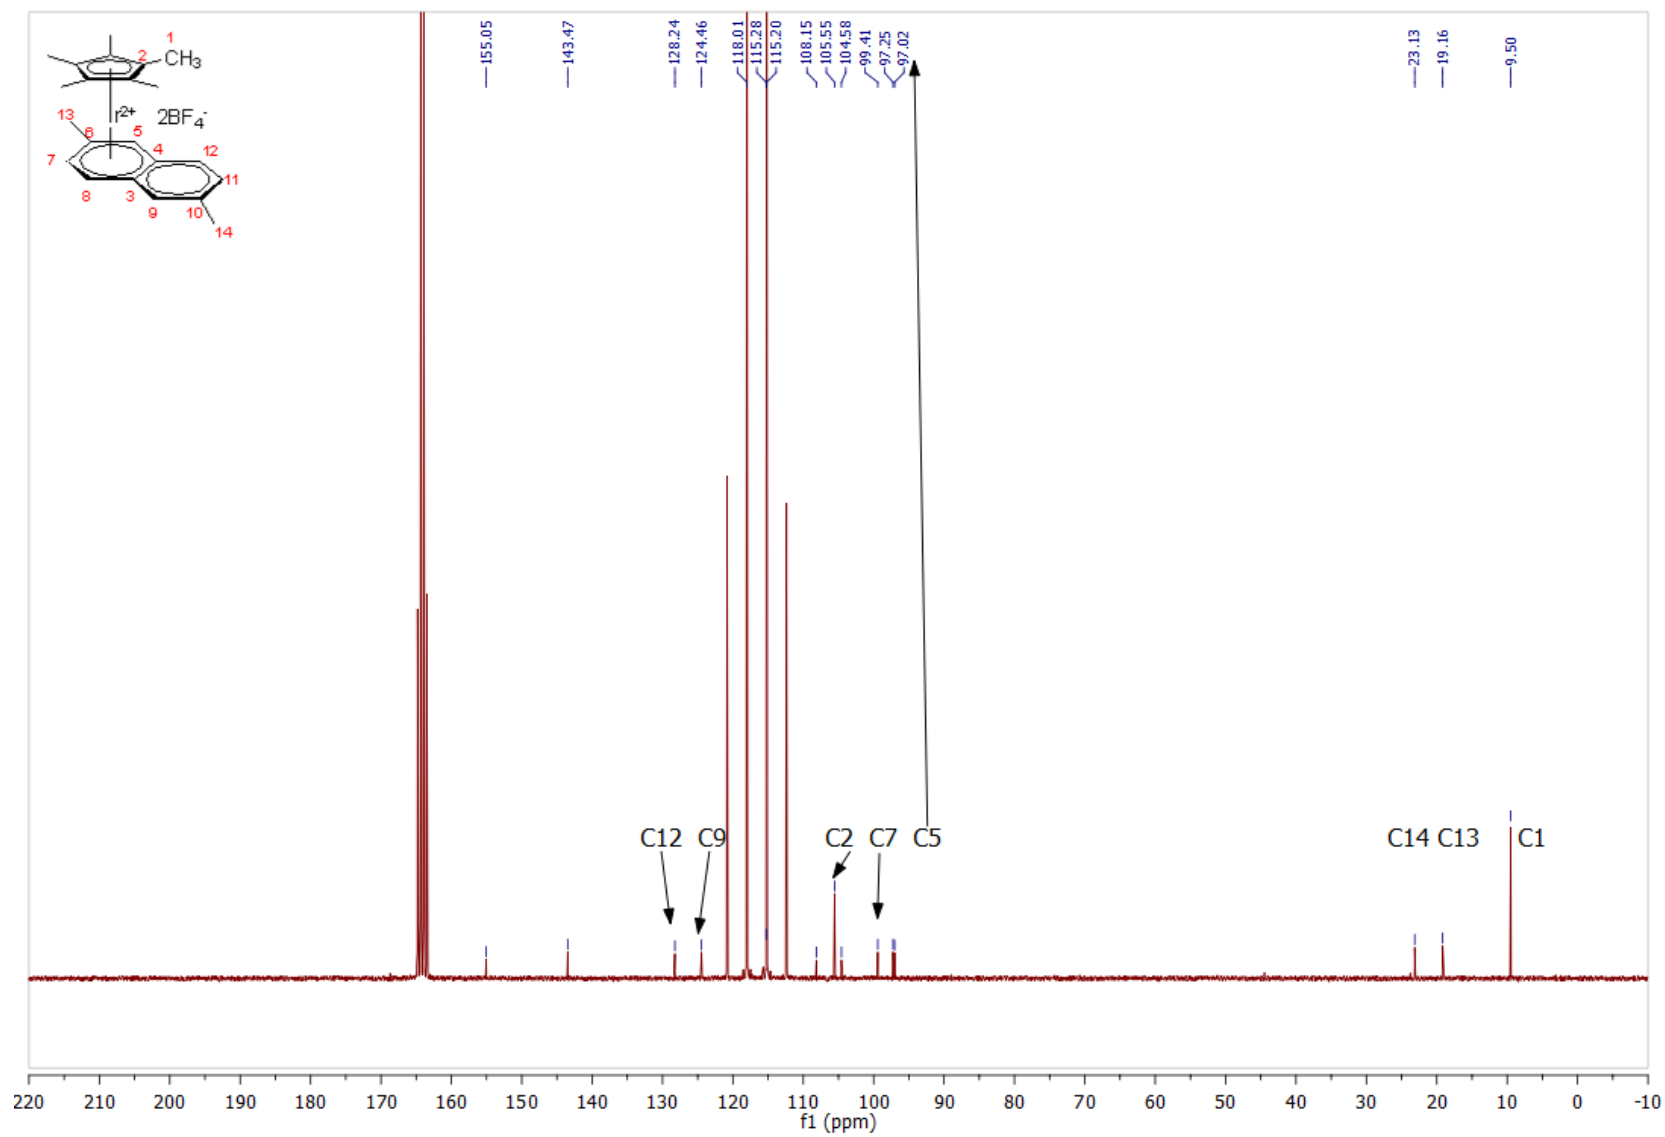

HMBC NMR spectrum of  $[\text{Cp}^*\text{Ir}(\eta^6\text{-2,6-dimethylnaphthalene})][\text{BF}_4]_2$  in TFA-d.

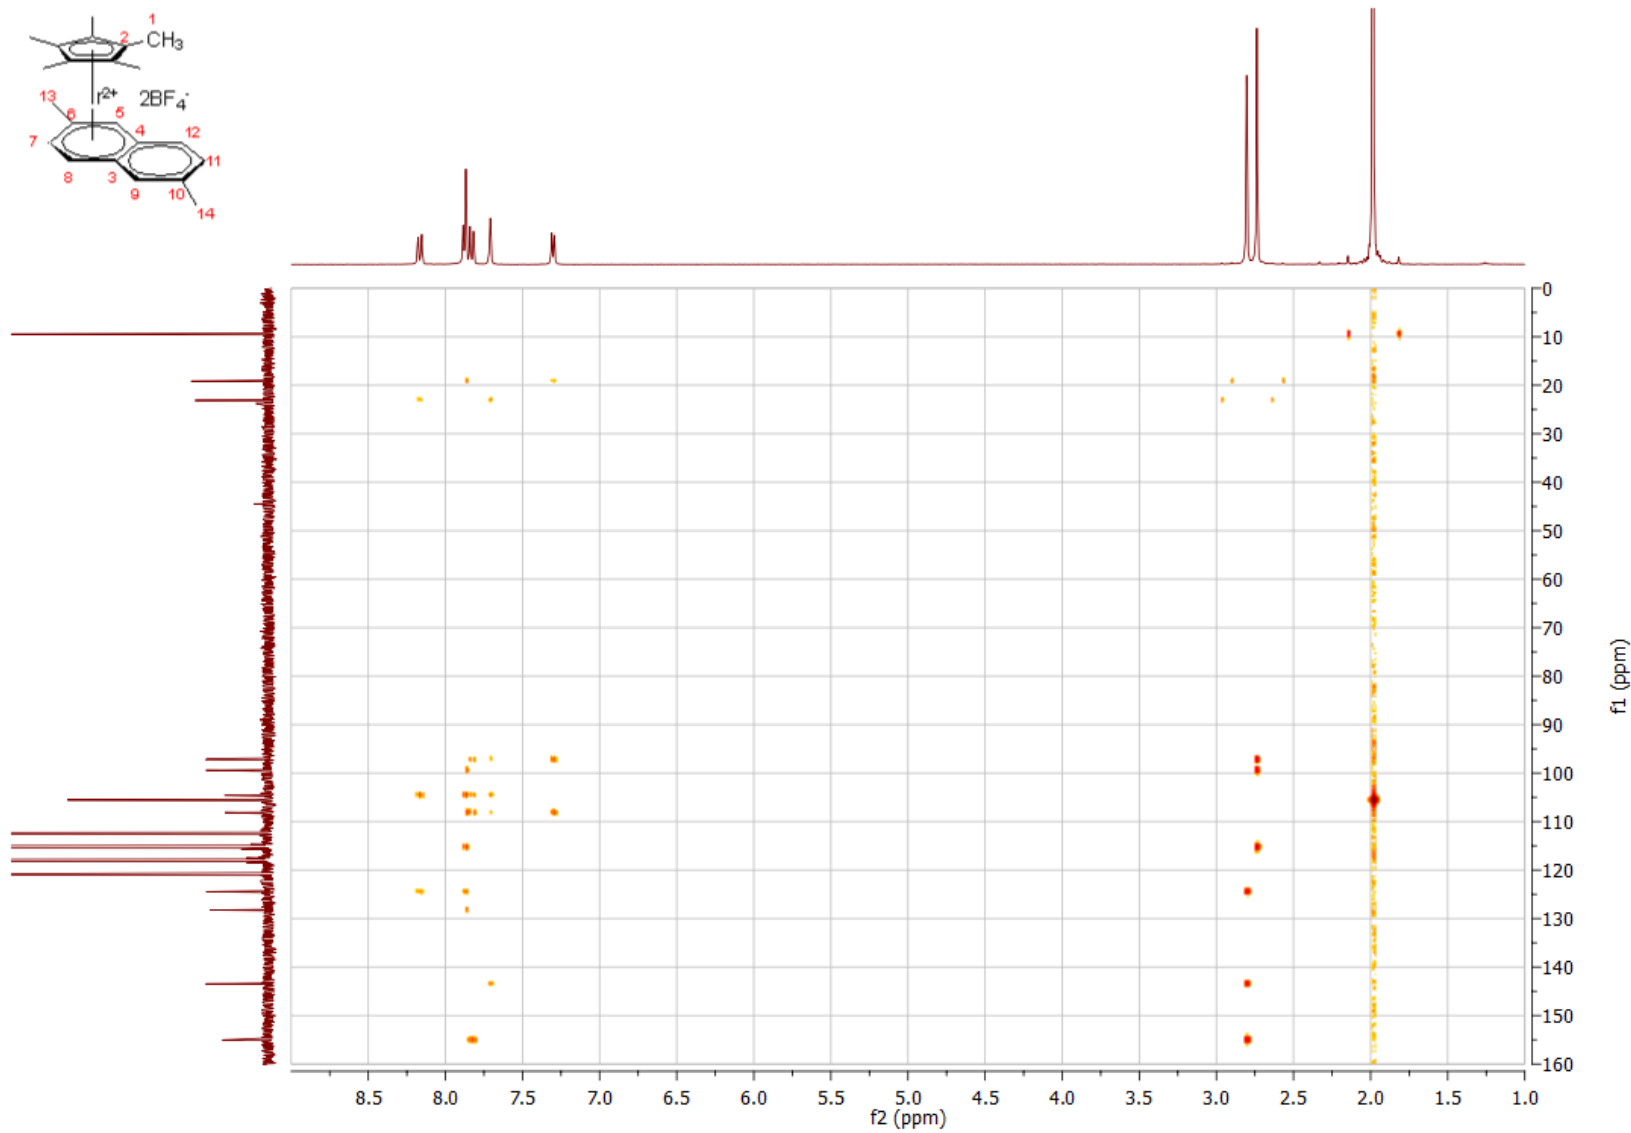

$^2\text{H}$  NMR spectrum of **mesitylene- $\text{d}_3$**  in TFA.

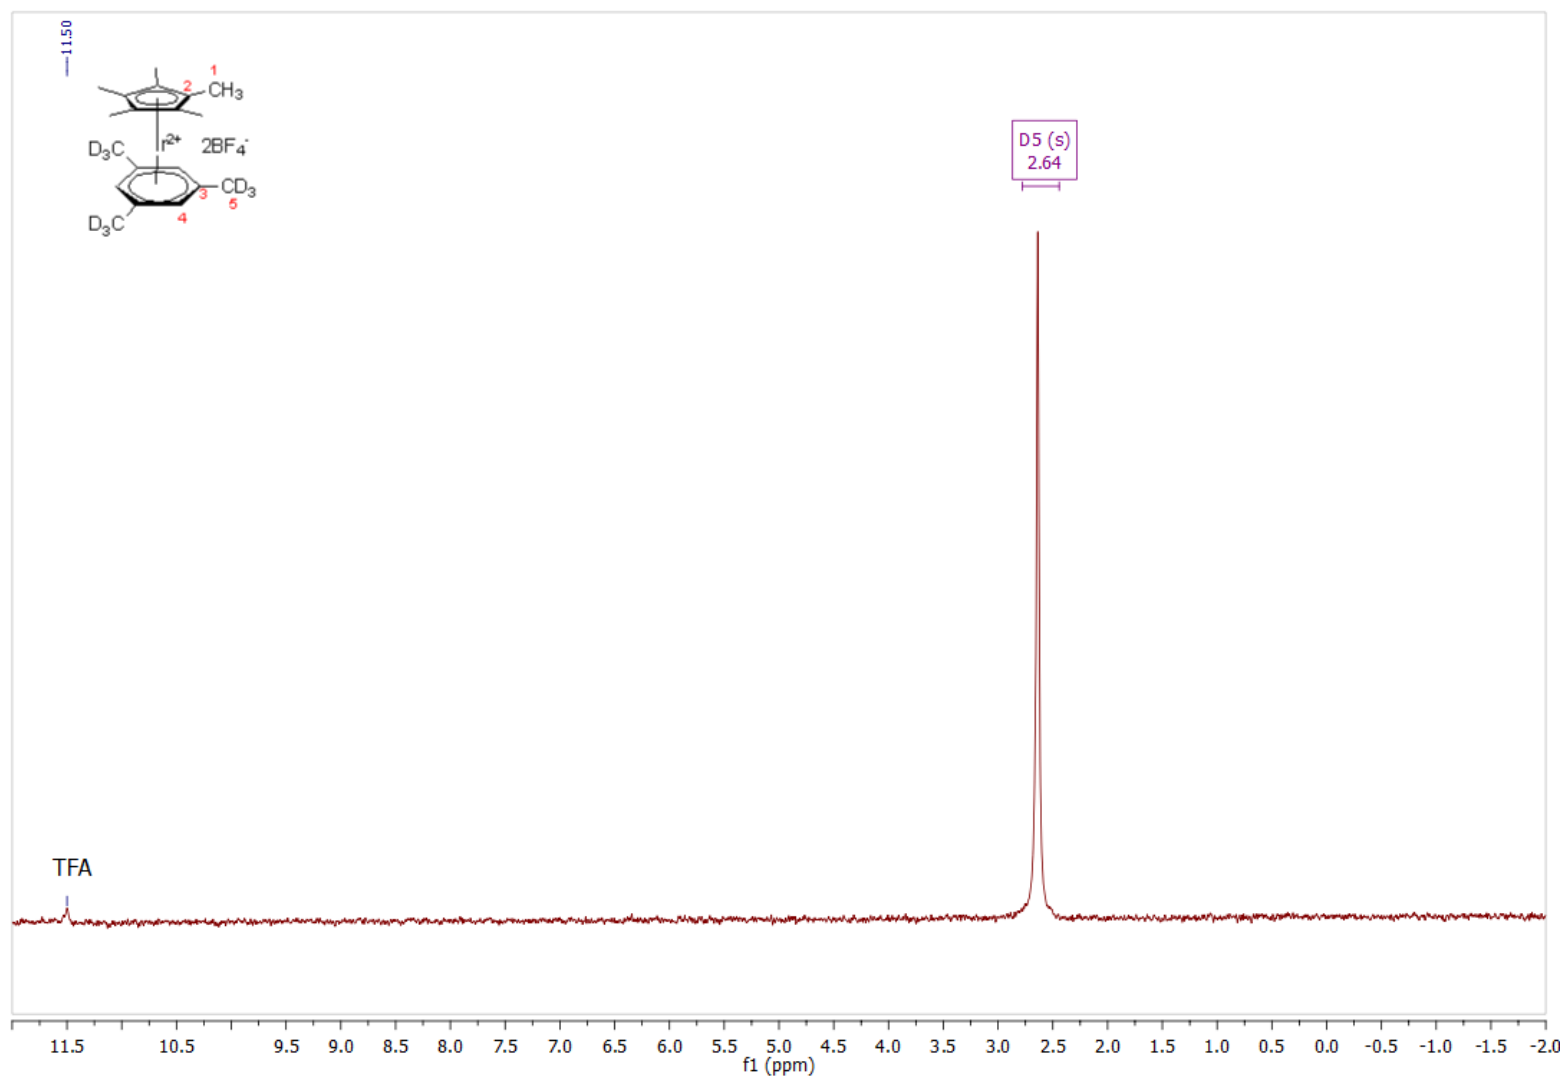

$^1\text{H}$  NMR spectrum of **1-d<sub>3</sub>** in  $\text{C}_6\text{D}_6$ .

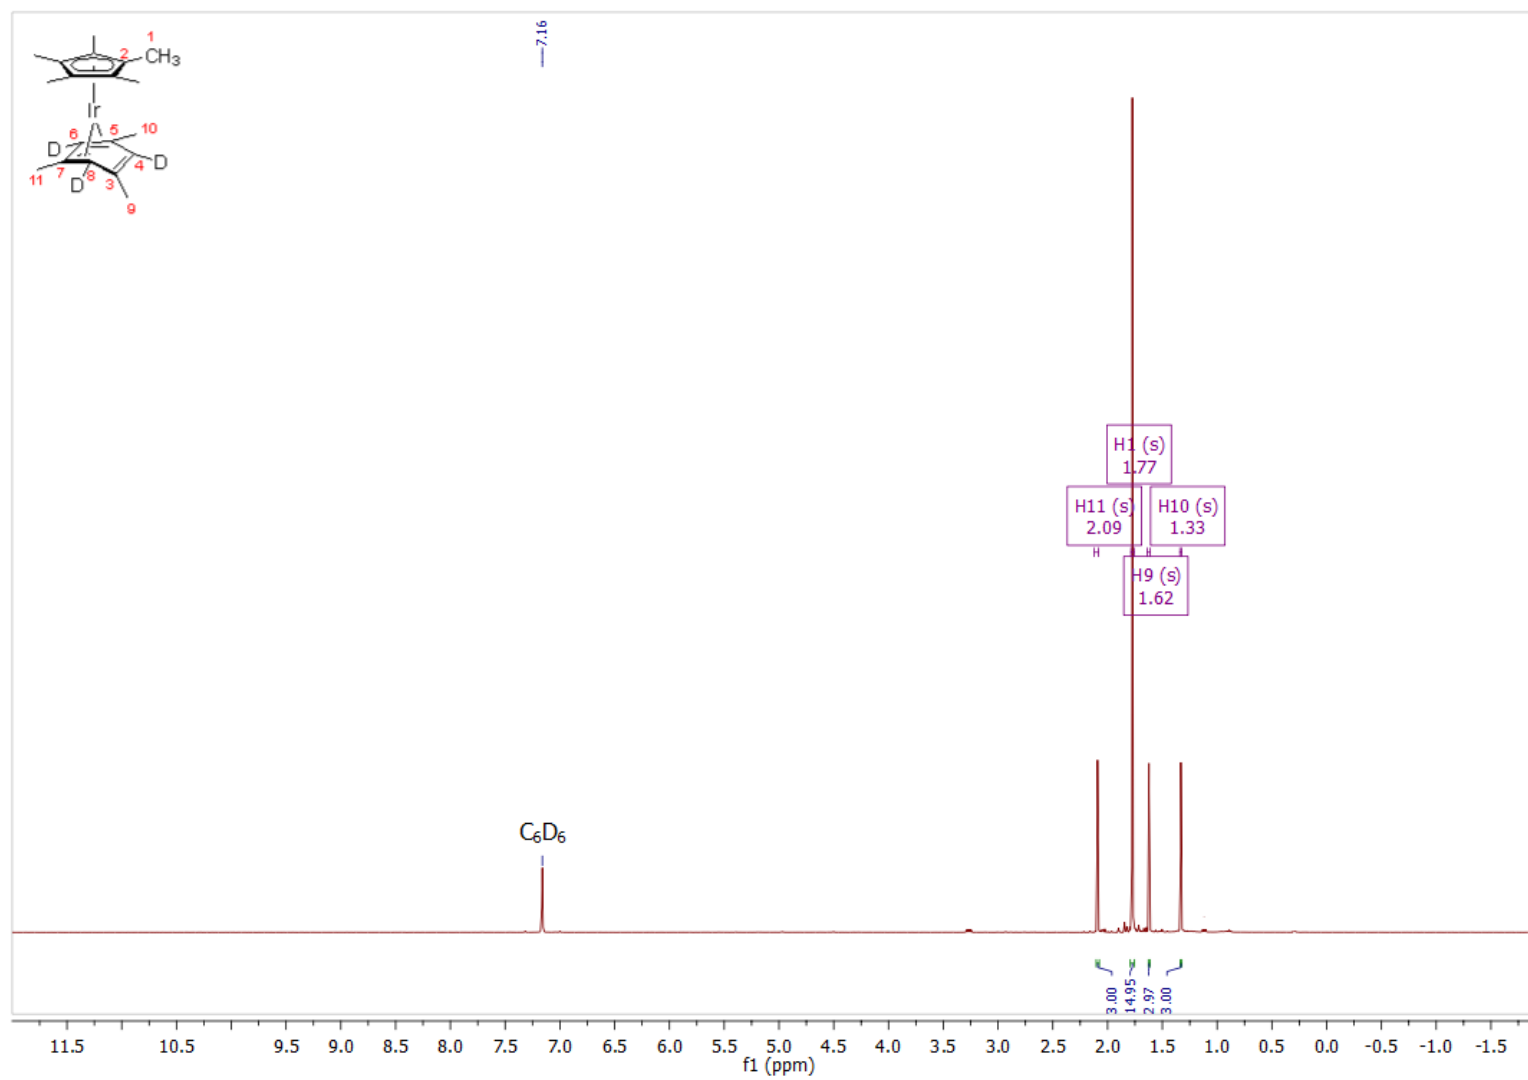



$^2\text{H}$  NMR spectrum of **1-d<sub>3</sub>** in  $\text{C}_6\text{H}_6$ .

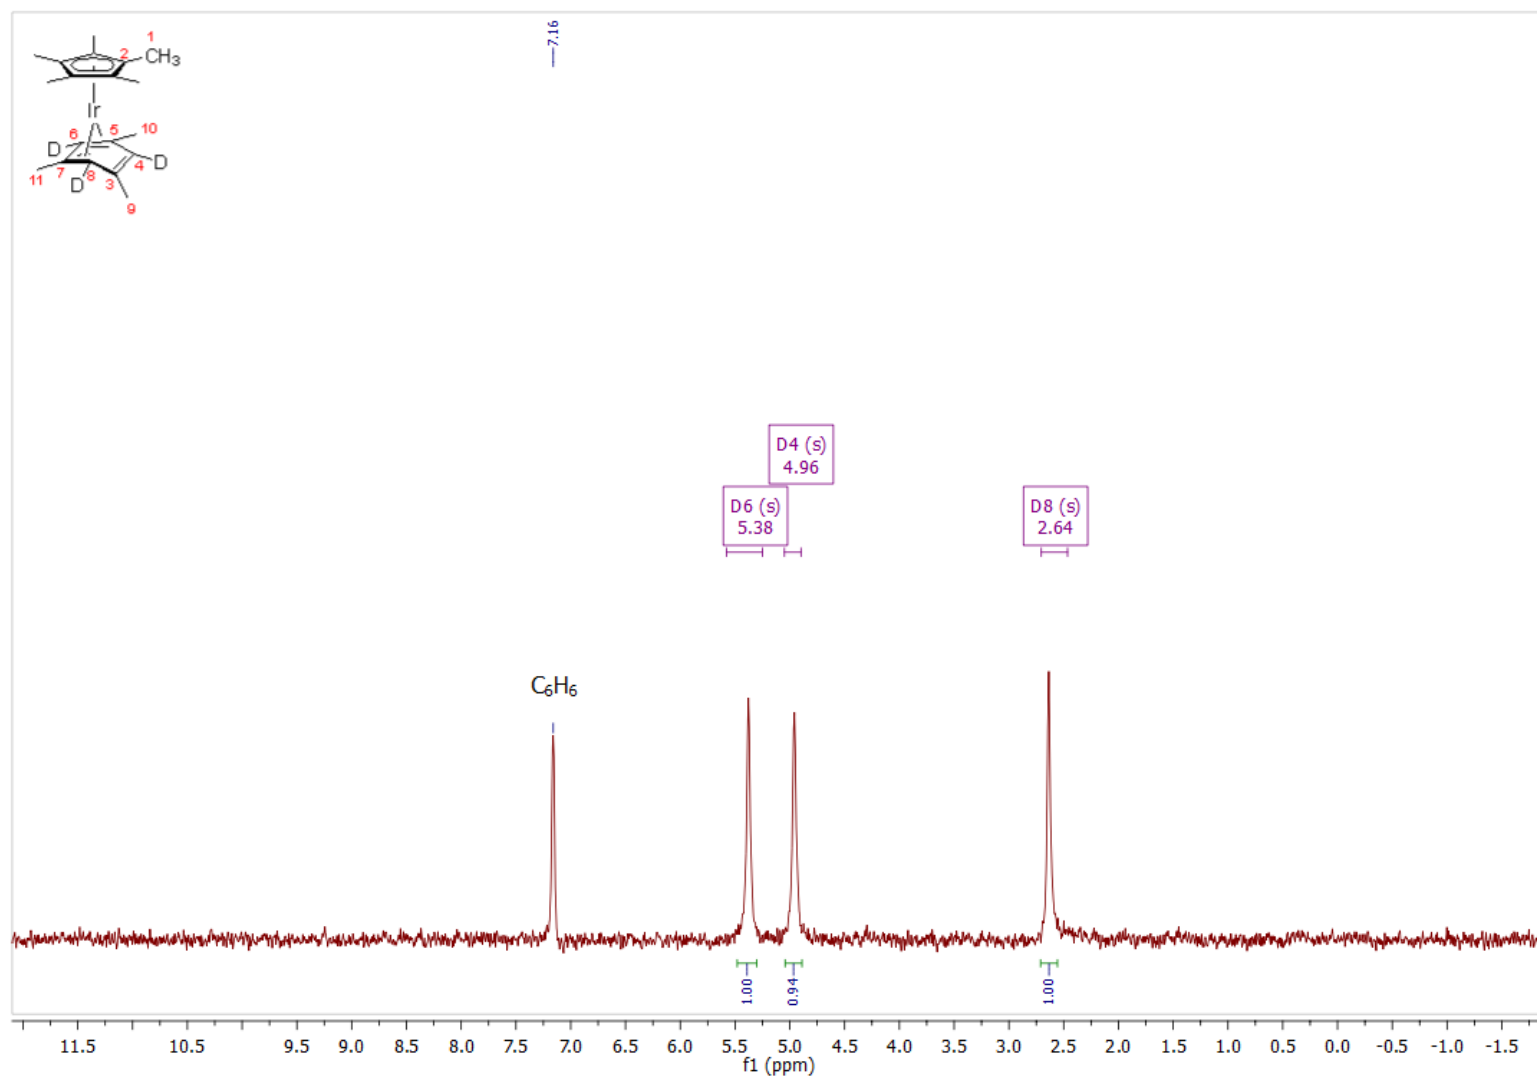

$^1\text{H}$  NMR spectrum of **1-d<sub>9</sub>** in  $\text{C}_6\text{D}_6$ .

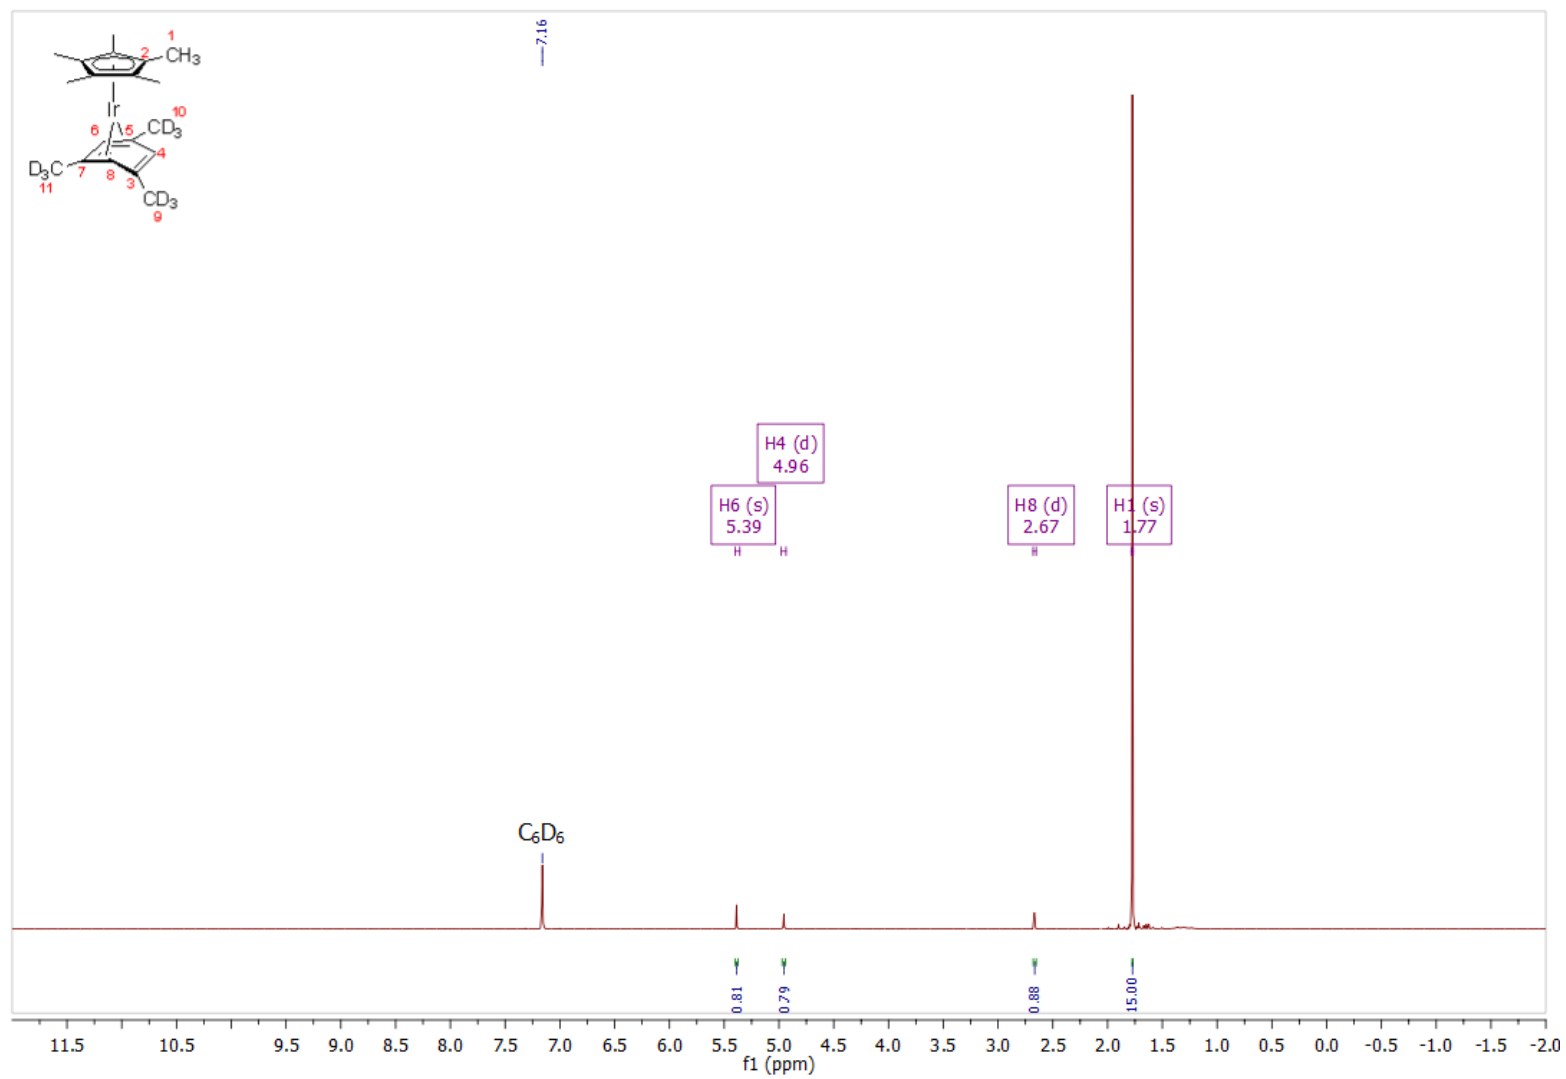

$^2\text{H}$  NMR spectrum of **1-d<sub>9</sub>** in  $\text{C}_6\text{H}_6$ .

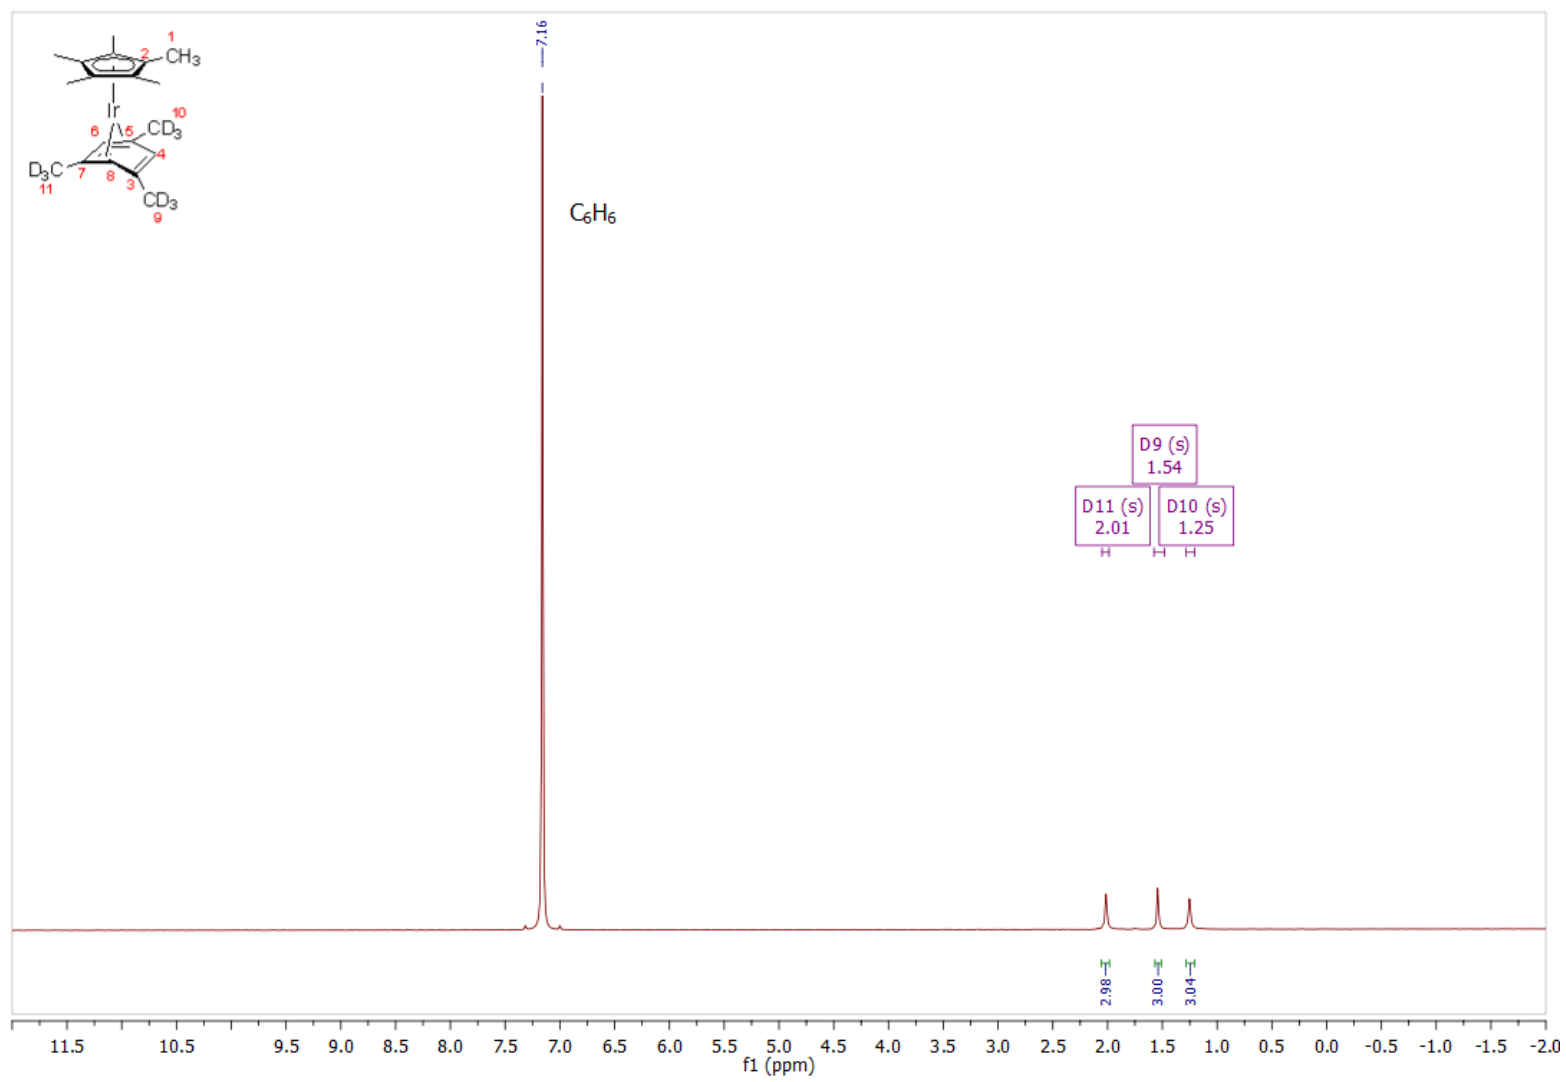

$^1\text{H}$  NMR spectrum of  $[\text{Cp}^*\text{Ir}(\eta^4\text{-C}_6\text{Me}_6)]$  in  $\text{C}_6\text{D}_6$ .

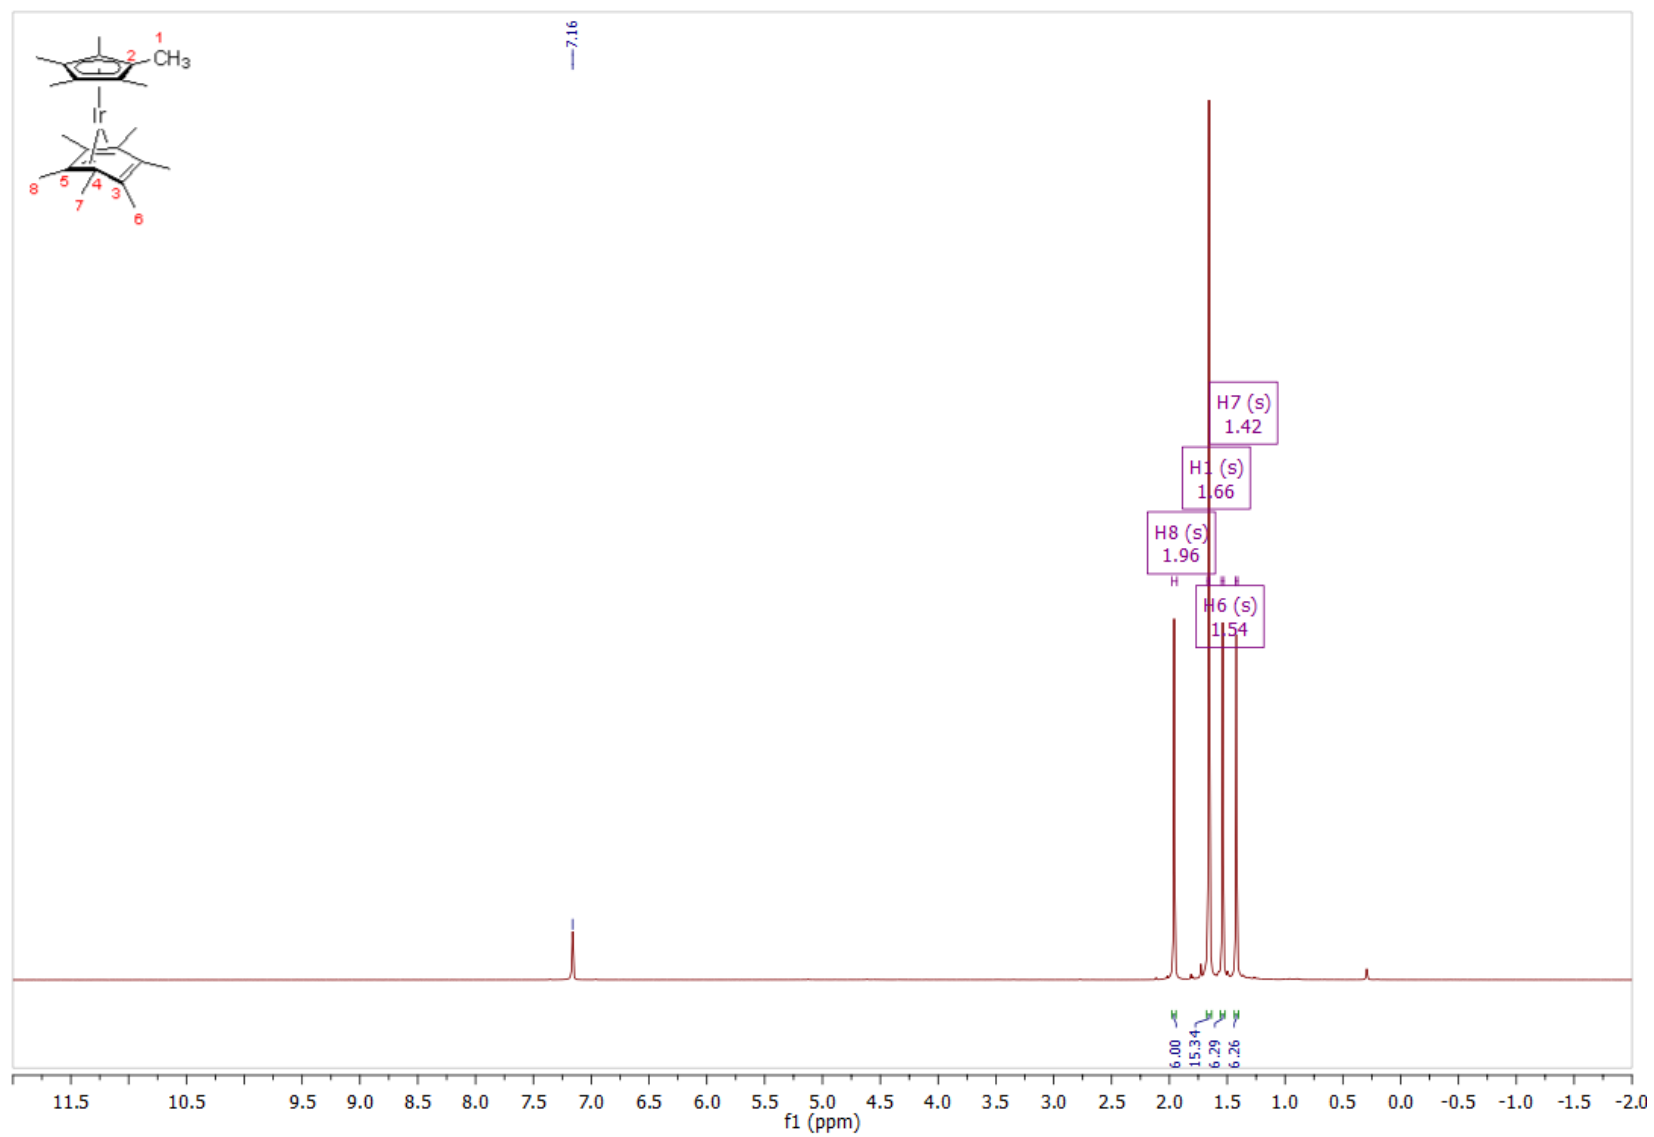

$^{13}\text{C}\{^1\text{H}\}$  NMR spectrum of  $[\text{Cp}^*\text{Ir}(\eta^4\text{-C}_6\text{Me}_6)]$  in  $\text{C}_6\text{D}_6$ .

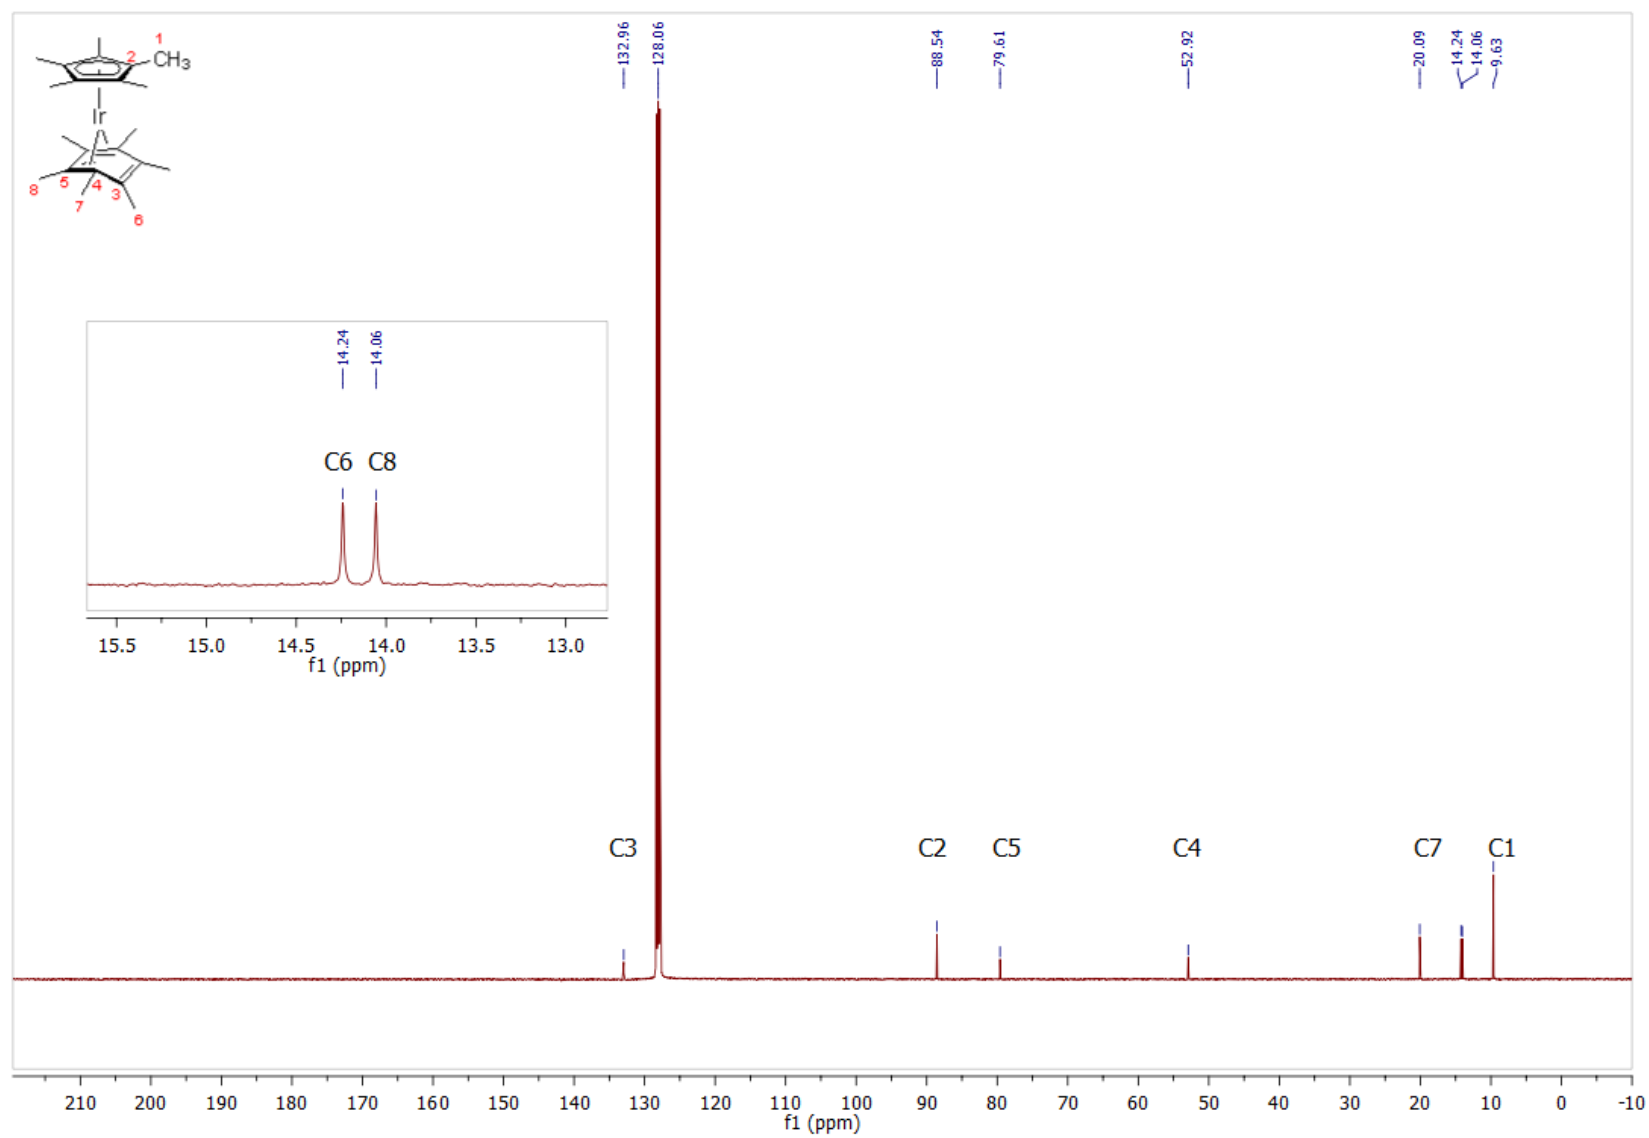

HMBC NMR spectrum of  $[\text{Cp}^*\text{Ir}(\eta^4\text{-C}_6\text{Me}_6)]$  in  $\text{C}_6\text{D}_6$ .

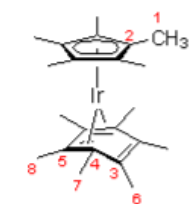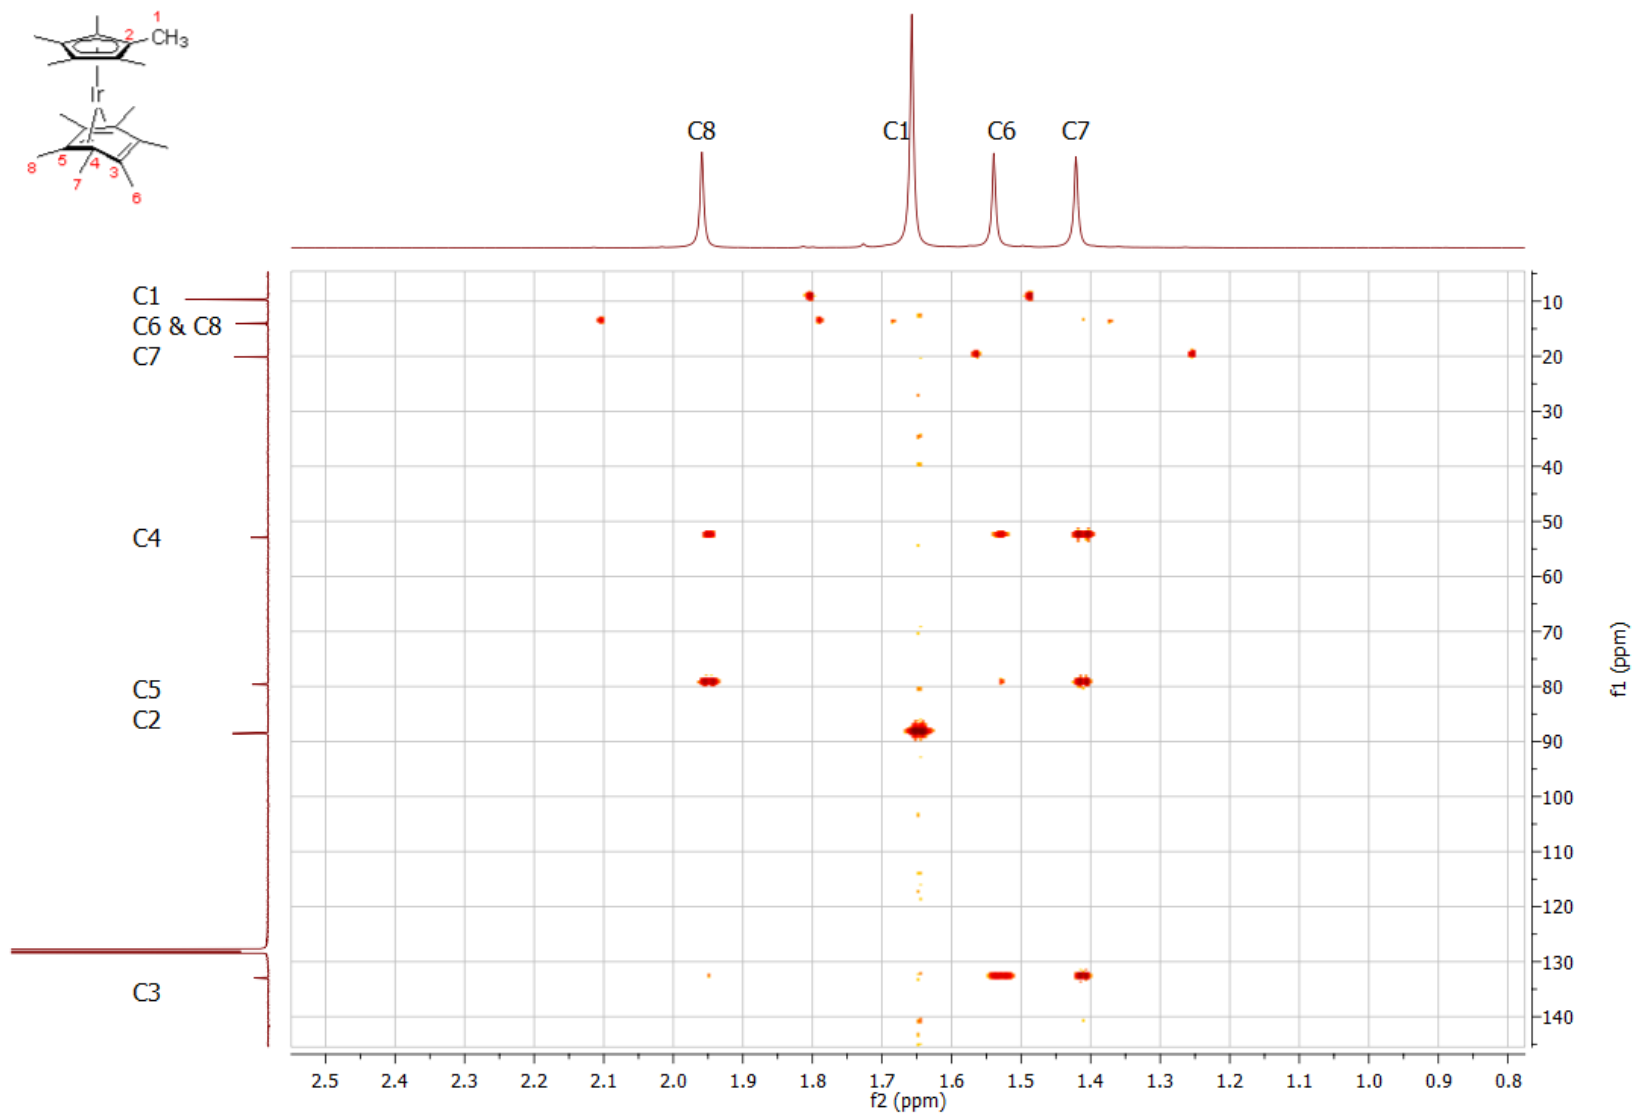

$^1\text{H}$  NMR spectrum of  $[\text{Cp}^*\text{Ir}(\eta^4\text{-naphthalene})]$  in  $\text{C}_6\text{D}_6$ .

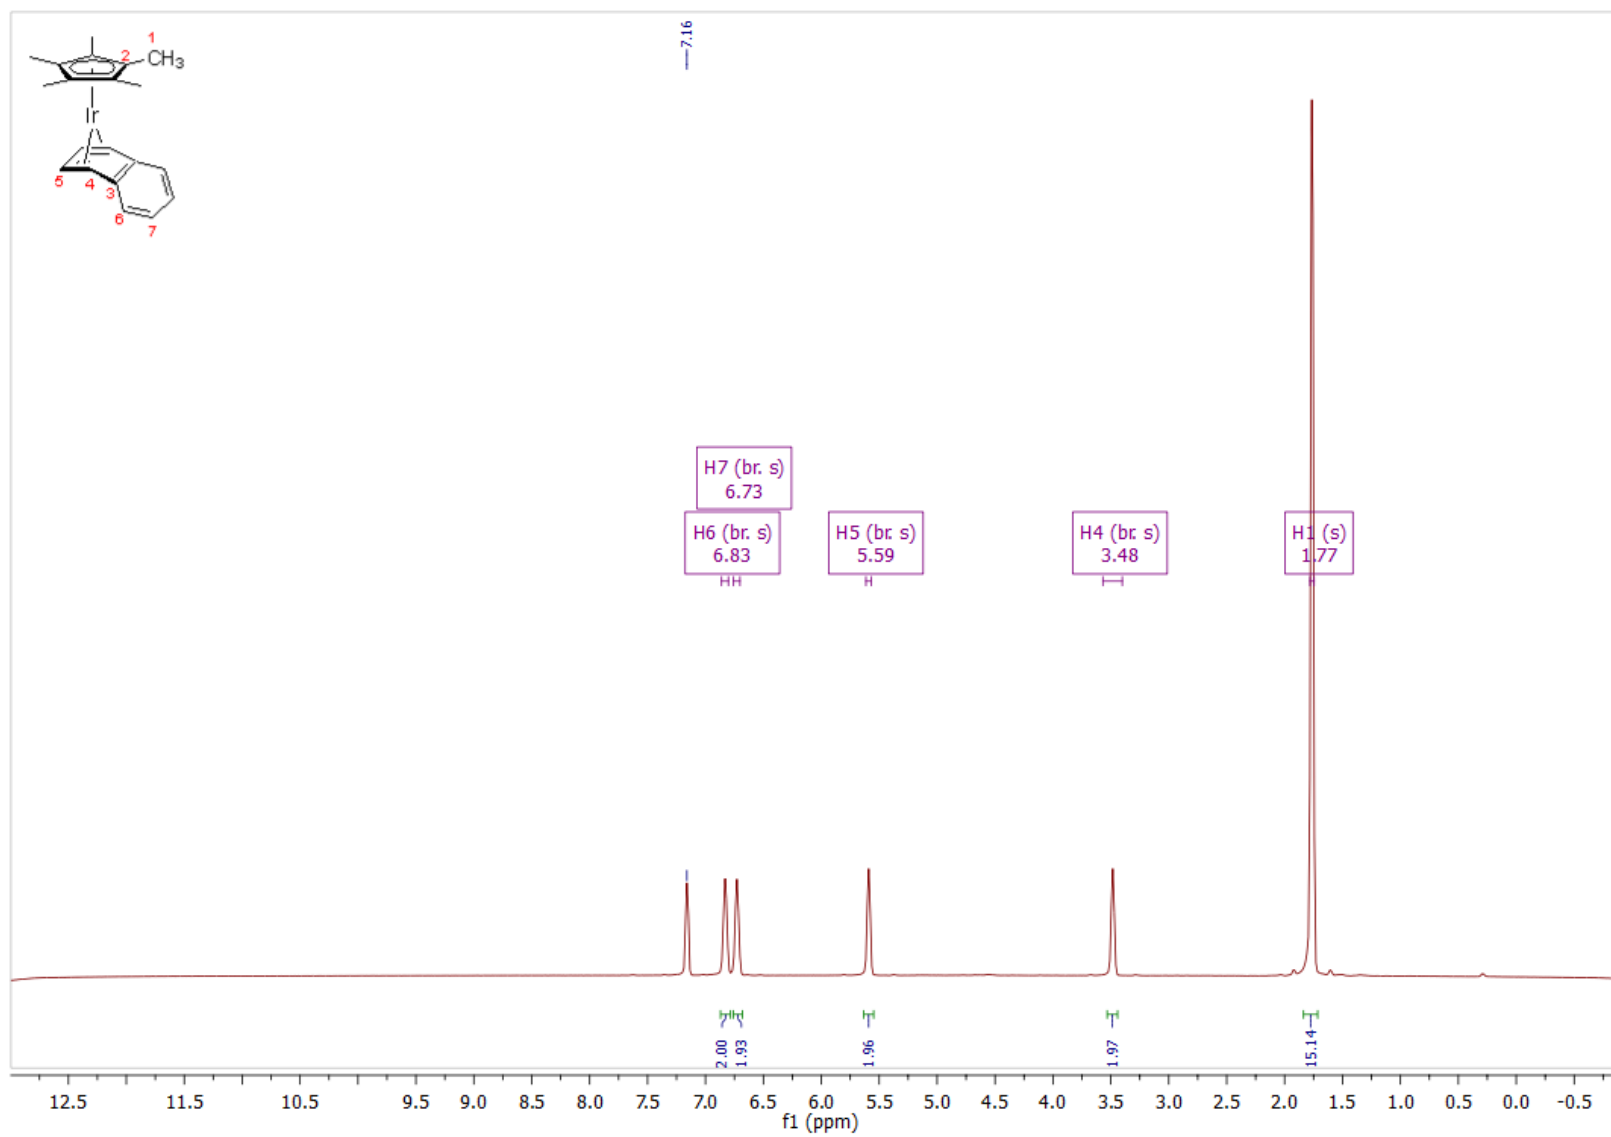

$^{13}\text{C}\{^1\text{H}\}$  NMR spectrum of  $[\text{Cp}^*\text{Ir}(\eta^4\text{-naphthalene})]$  in  $\text{C}_6\text{D}_6$ .

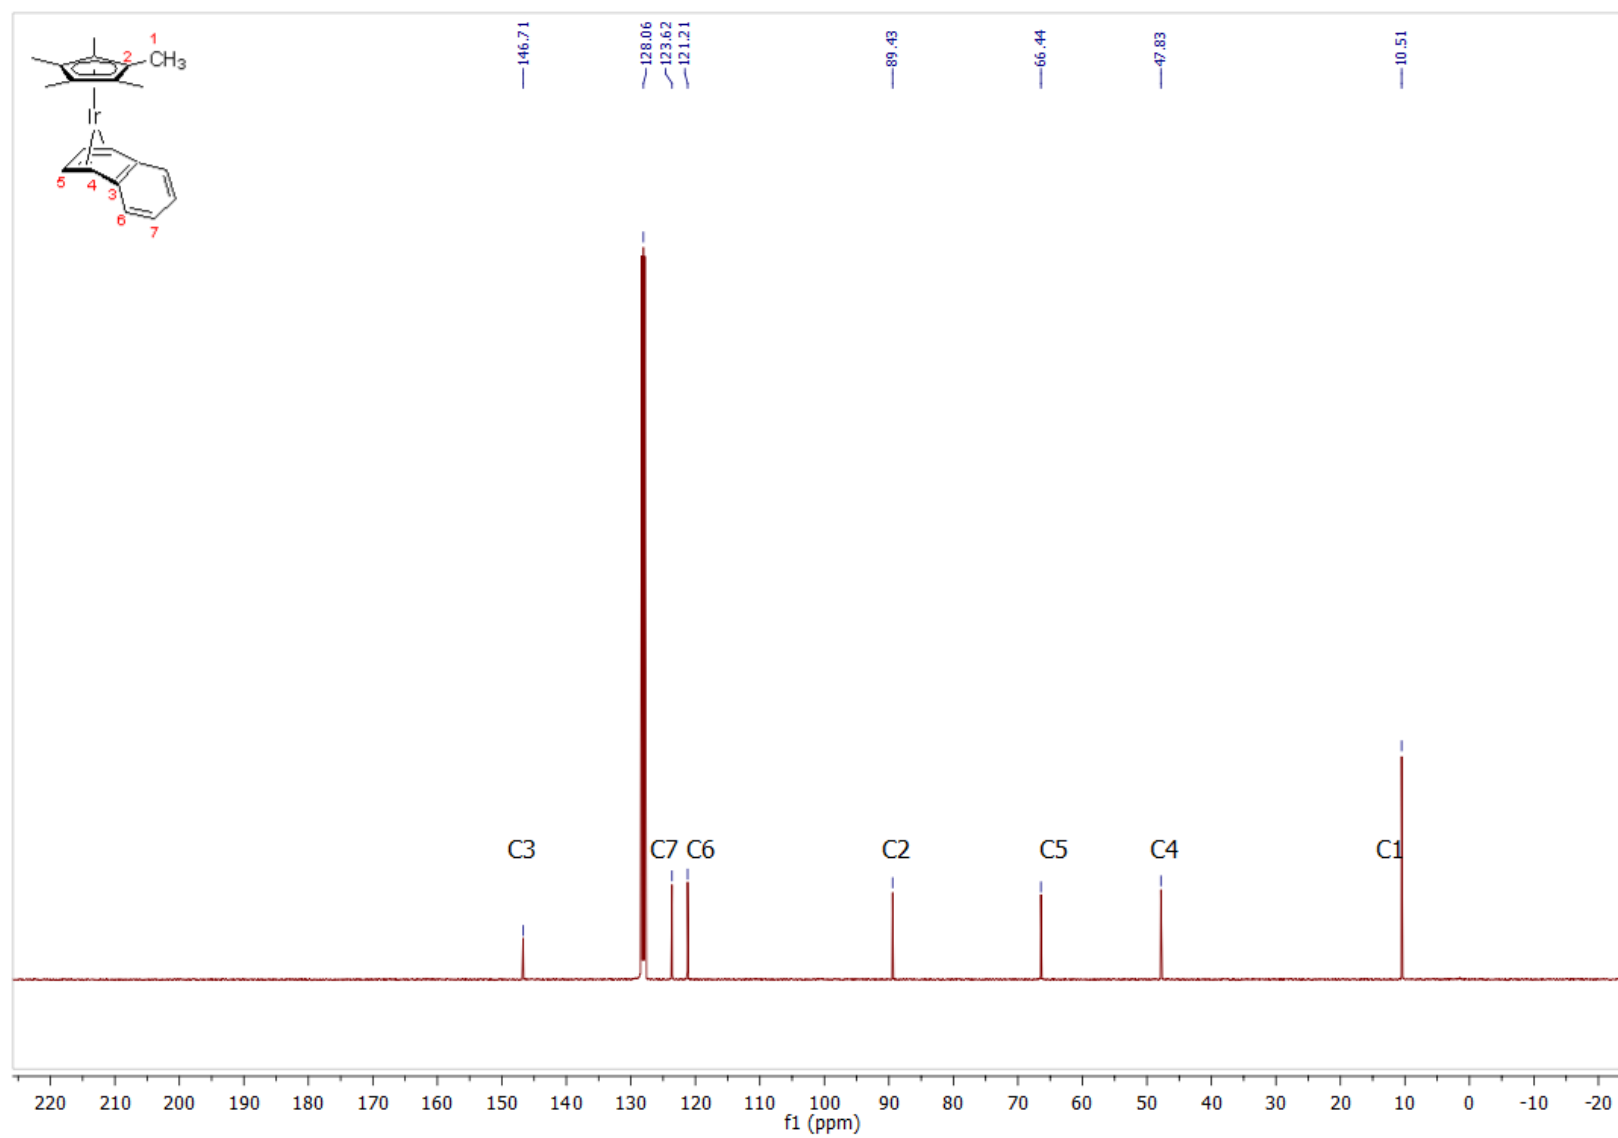



HSQC NMR spectrum of  $[\text{Cp}^*\text{Ir}(\eta^4\text{-naphthalene})]$  in  $\text{C}_6\text{D}_6$ .

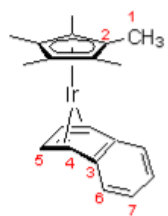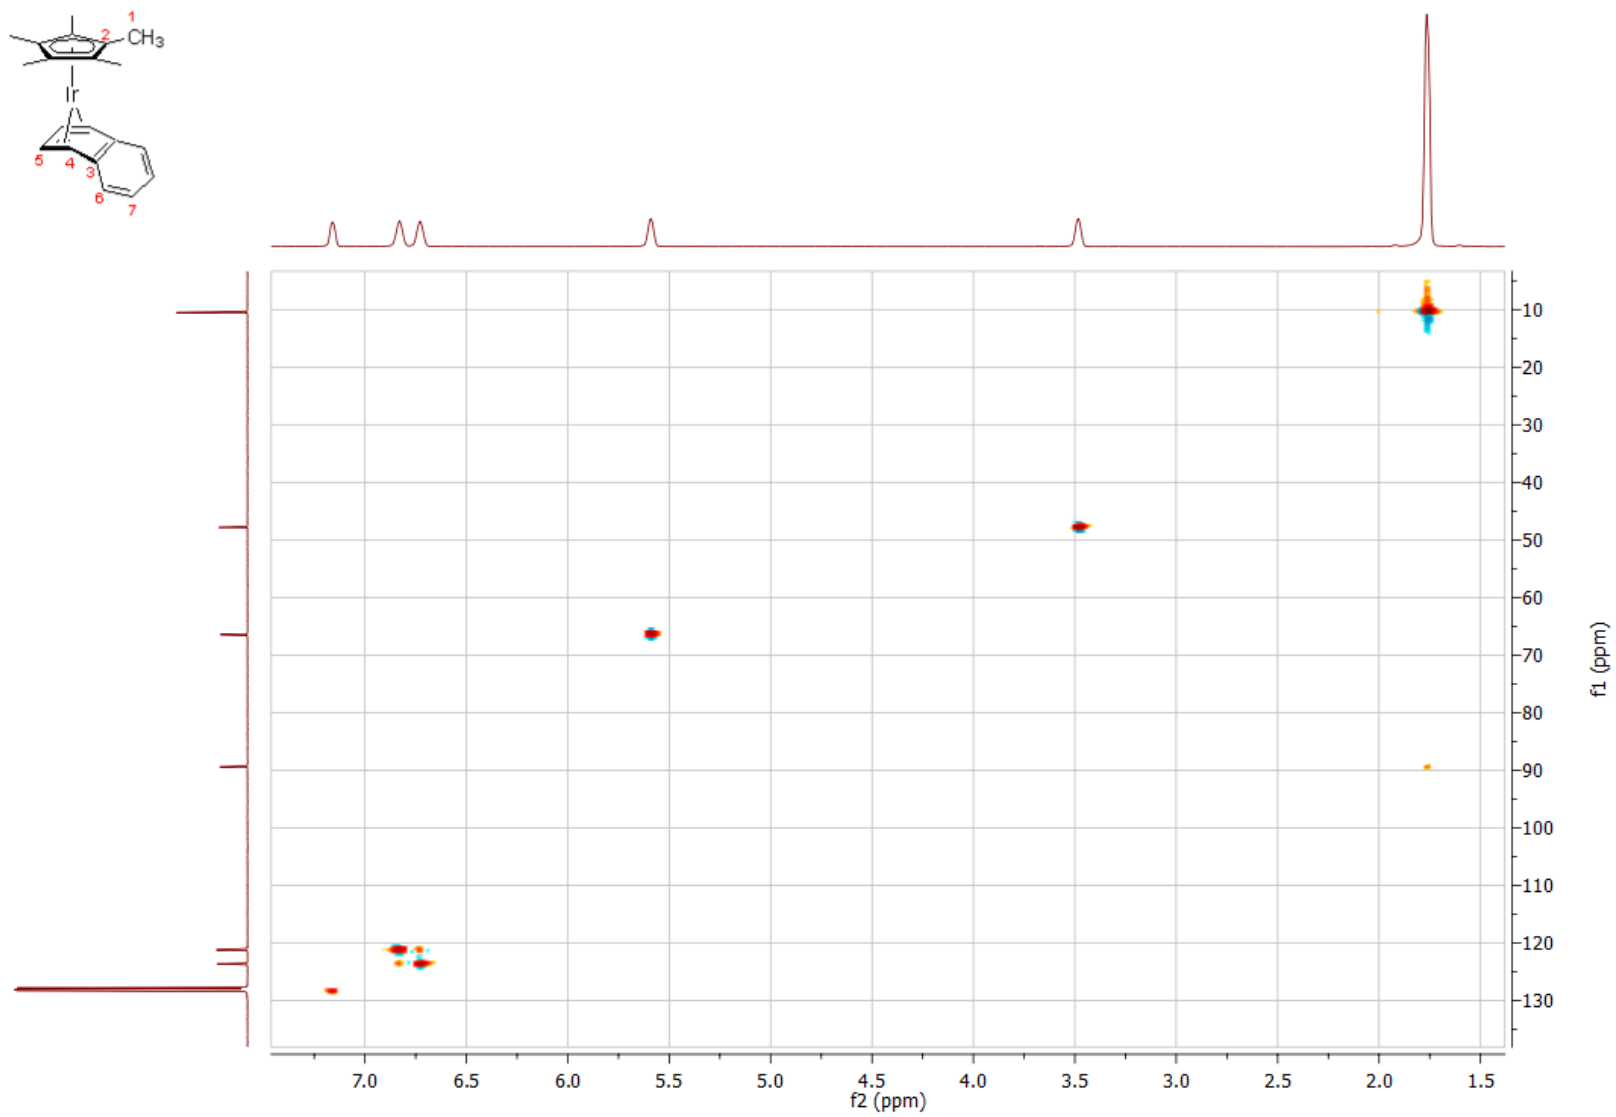

HMBC NMR spectrum of  $[\text{Cp}^*\text{Ir}(\eta^4\text{-naphthalene})]$  in  $\text{C}_6\text{D}_6$ .

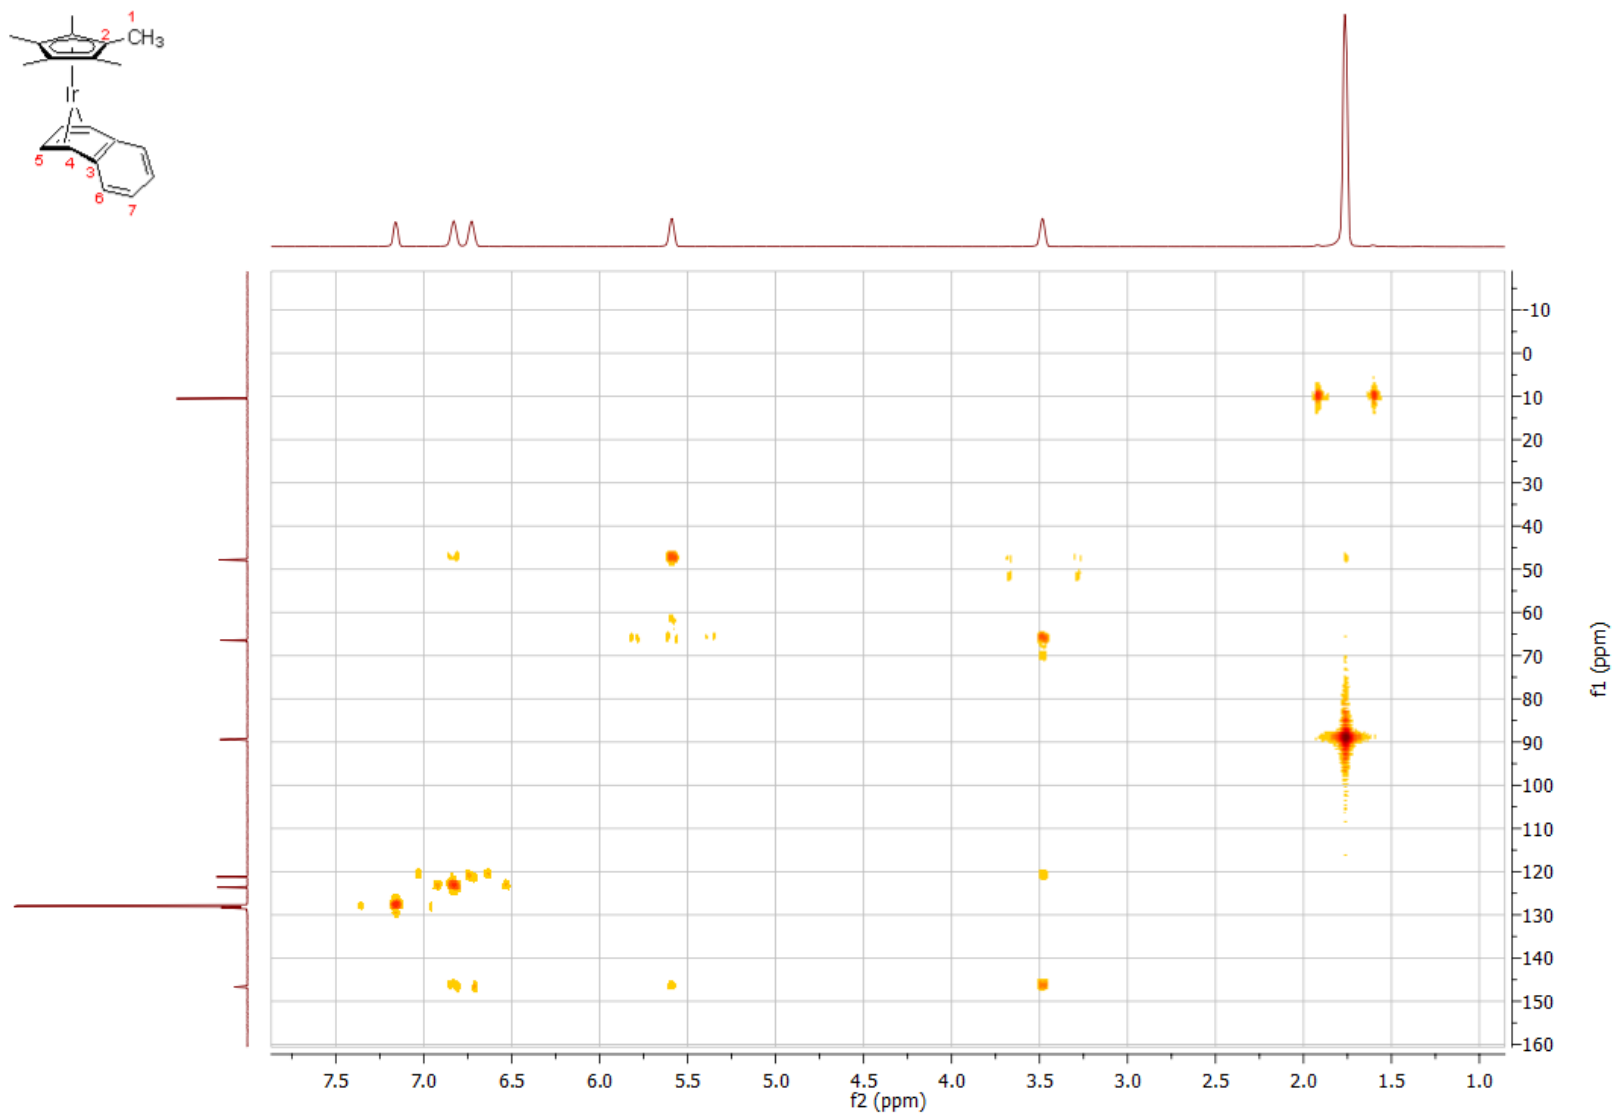

$^1\text{H}$  NMR spectrum of  $[\text{Cp}^*\text{Ir}(\eta^4\text{-2,6-dimethylnaphthalene})]$  in  $\text{C}_6\text{D}_6$ .

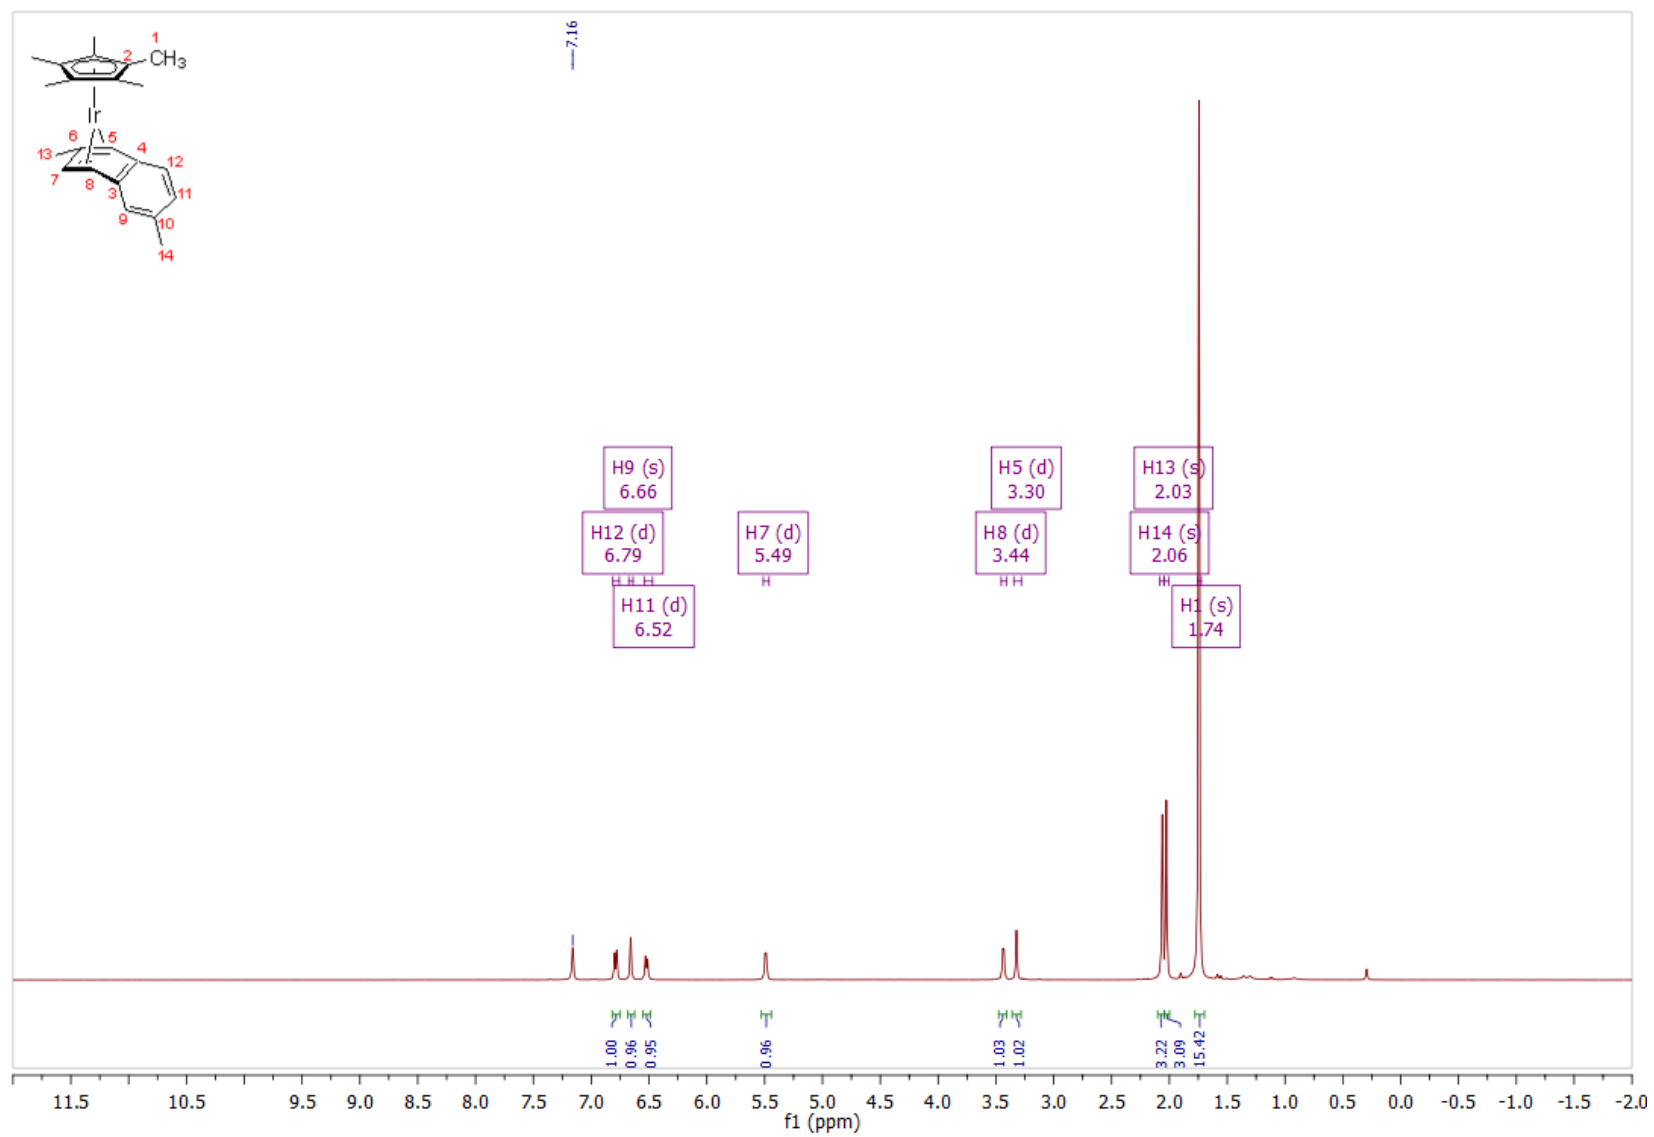

$^{13}\text{C}\{^1\text{H}\}$  NMR spectrum of  $[\text{Cp}^*\text{Ir}(\eta^4\text{-2,6-dimethylnaphthalene})]$  in  $\text{C}_6\text{D}_6$ .

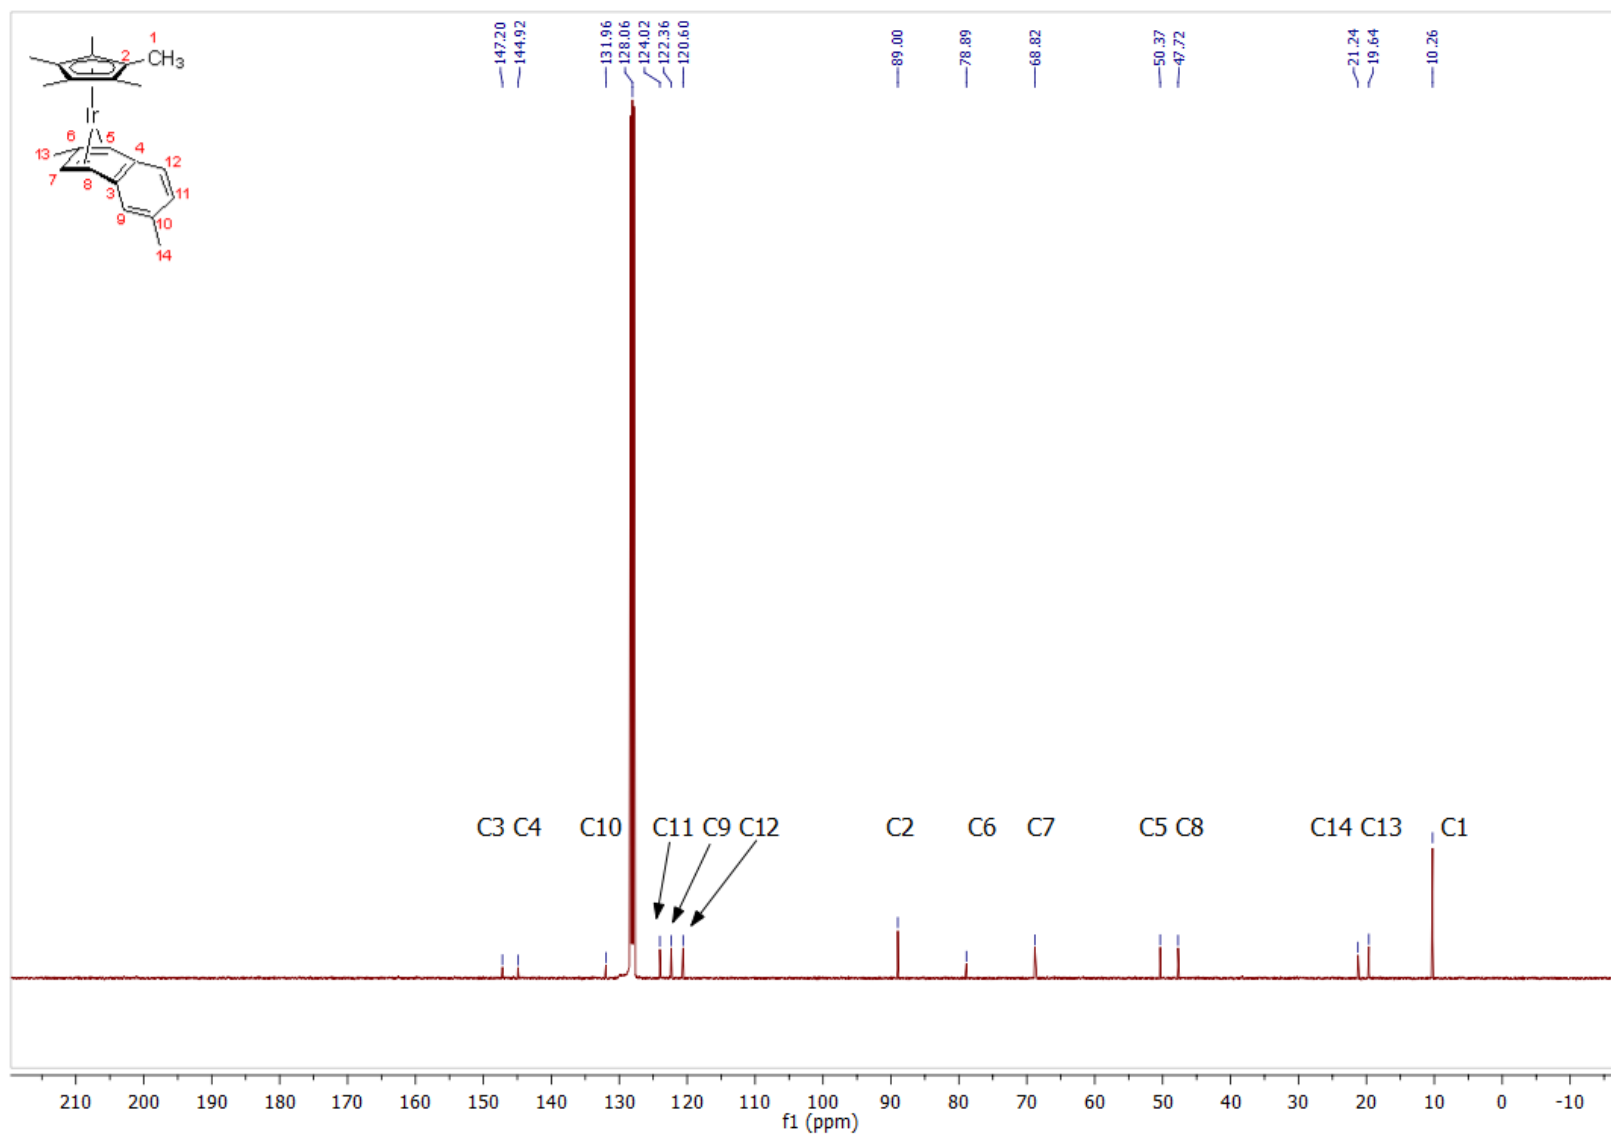

HSQC NMR spectrum of  $[\text{Cp}^*\text{Ir}(\eta^4\text{-2,6-dimethylnaphthalene)]$  in  $\text{C}_6\text{D}_6$ .

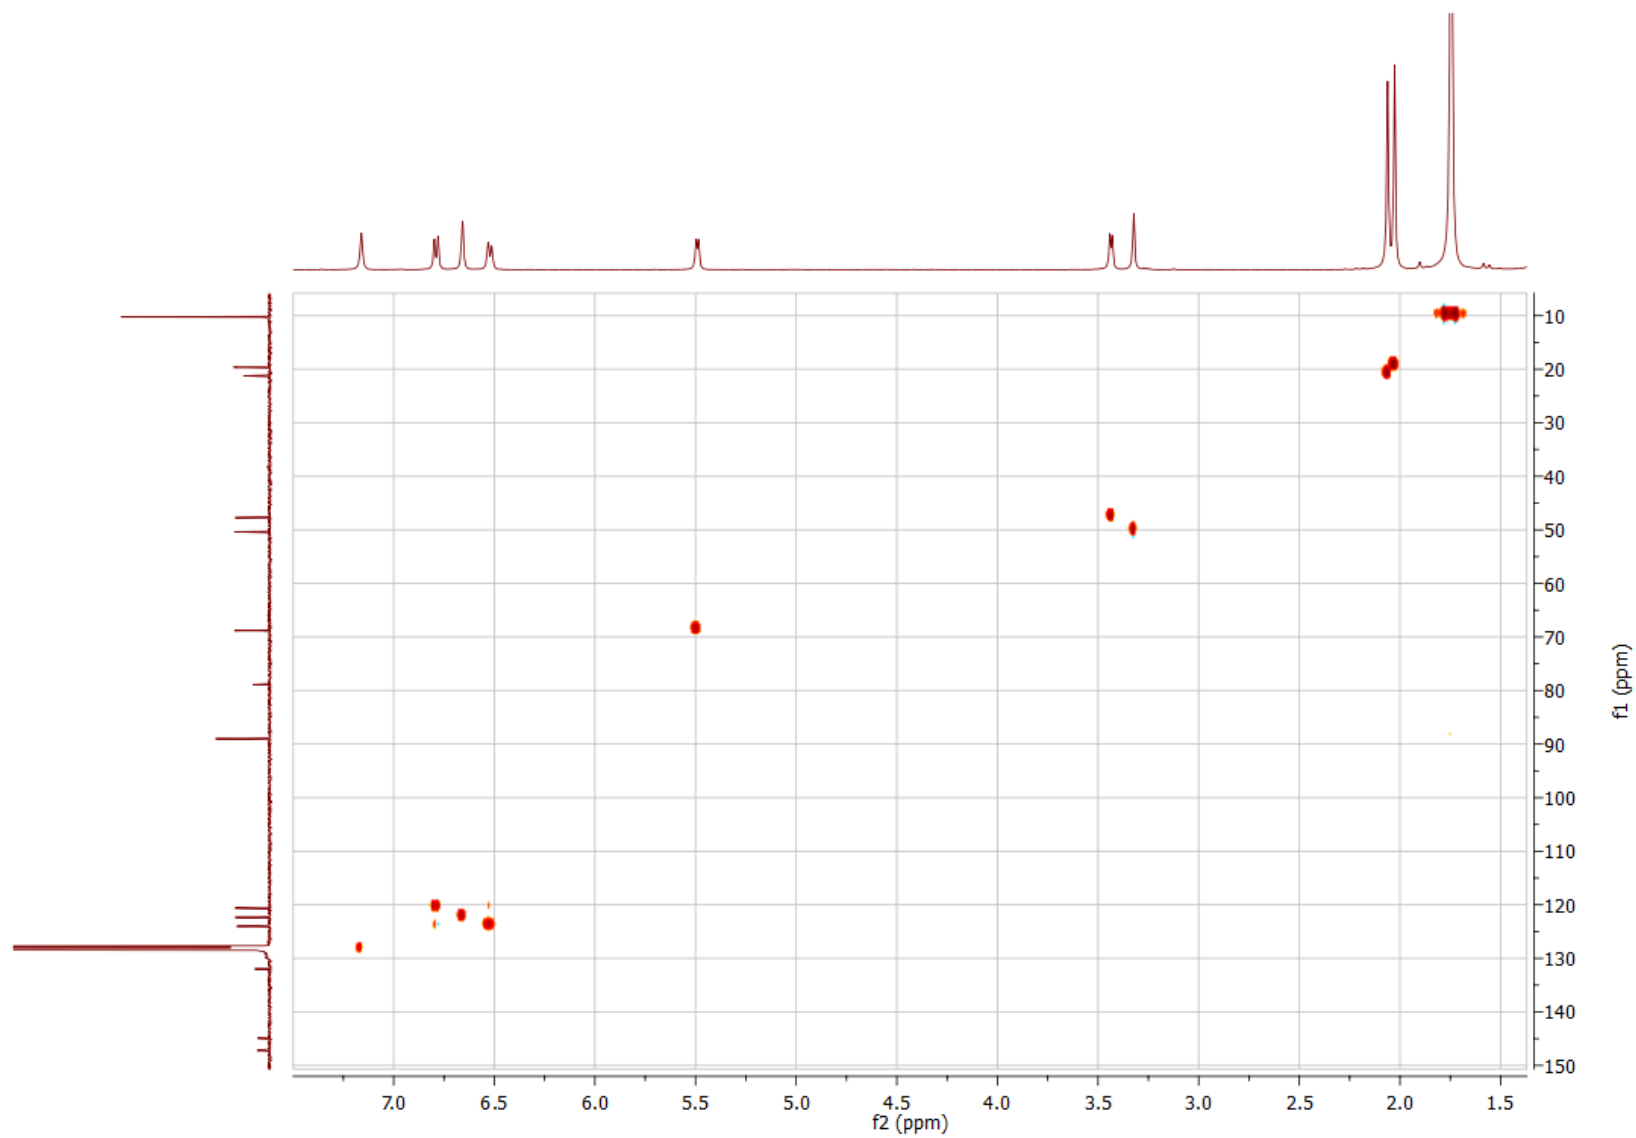

HMBC NMR spectrum of  $[\text{Cp}^*\text{Ir}(\eta^4\text{-2,6-dimethylnaphthalene})]$  in  $\text{C}_6\text{D}_6$ .

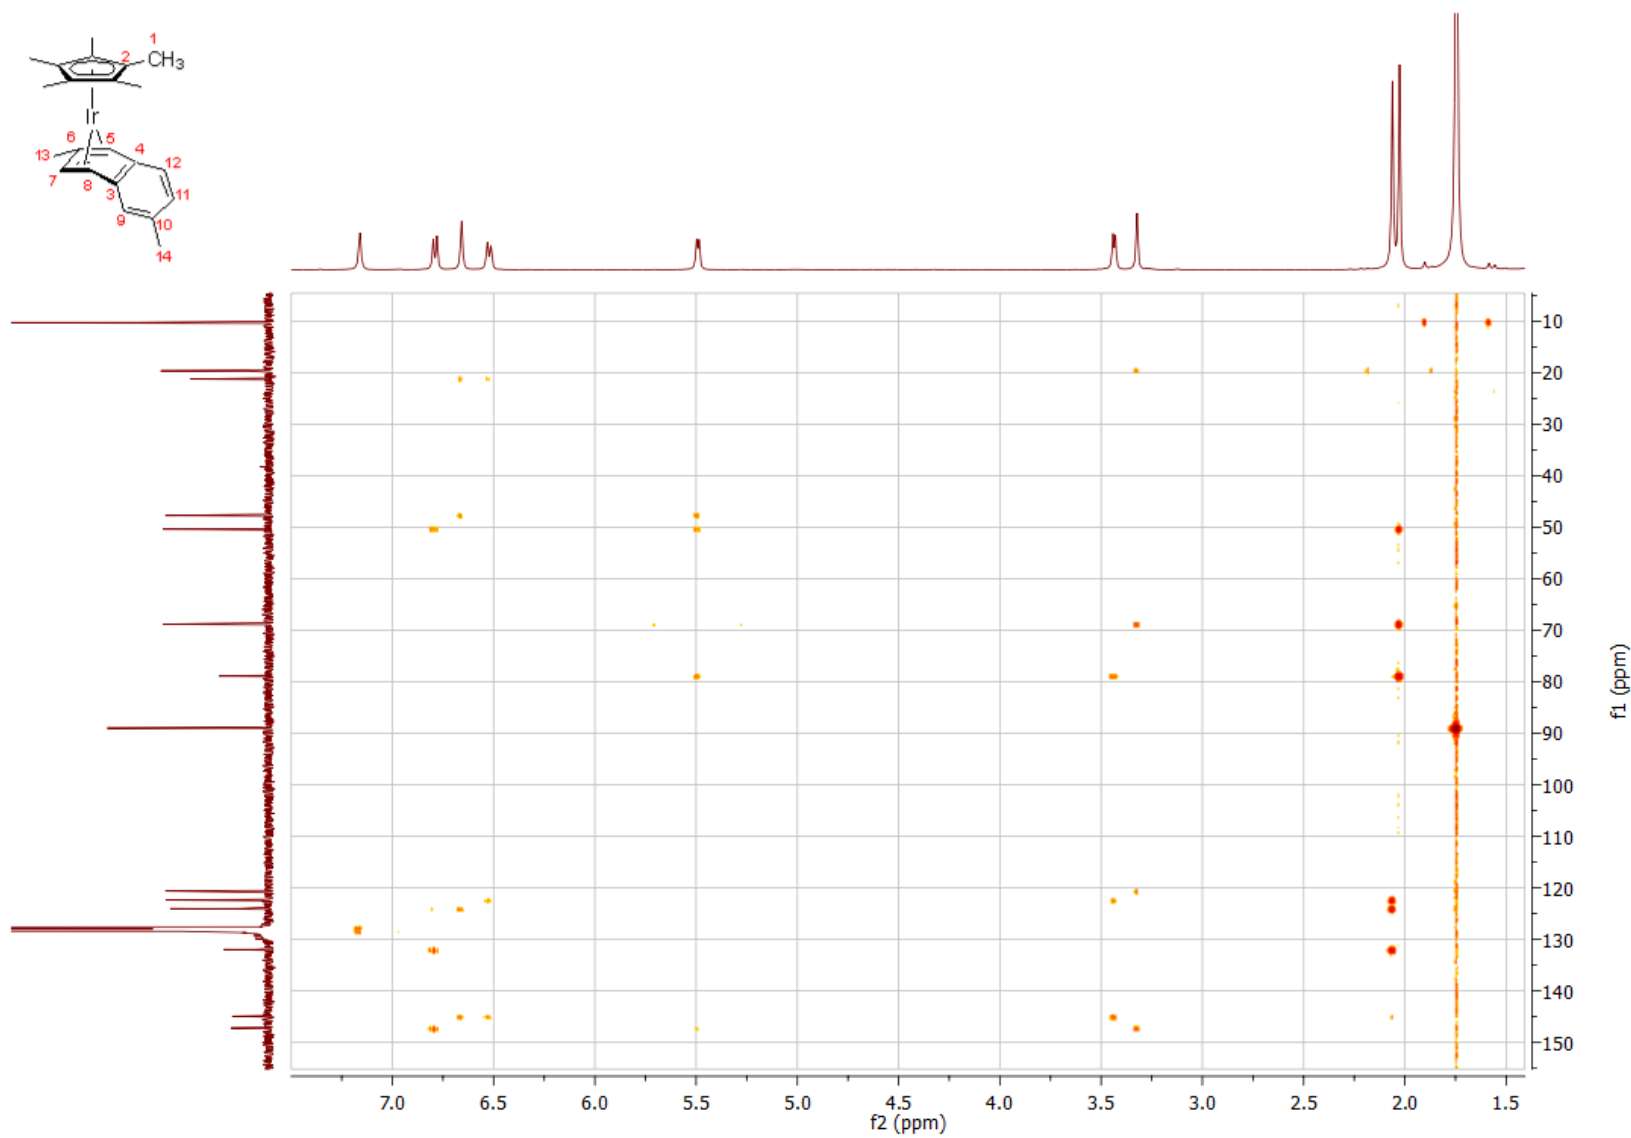

$^1\text{H}$  NMR spectrum of **2-d<sub>3</sub>** in  $\text{C}_6\text{D}_6$ .

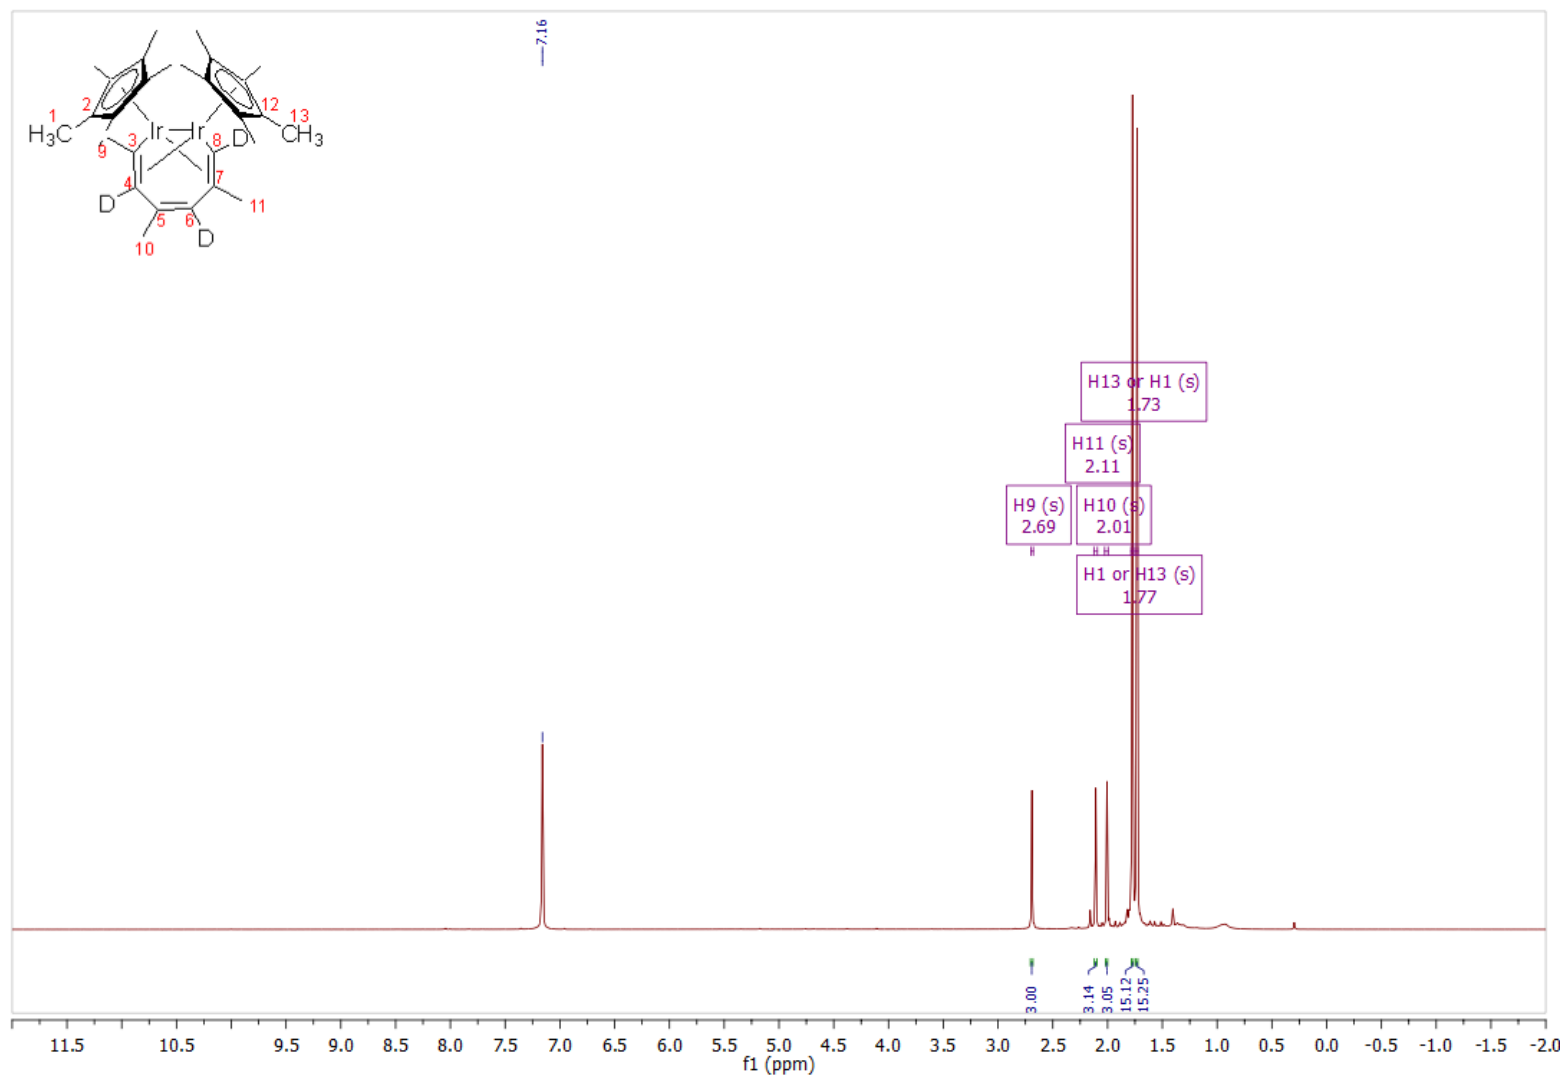

$^2\text{H}$  NMR spectrum of **2-d<sub>3</sub>** in  $\text{C}_6\text{H}_6$ .

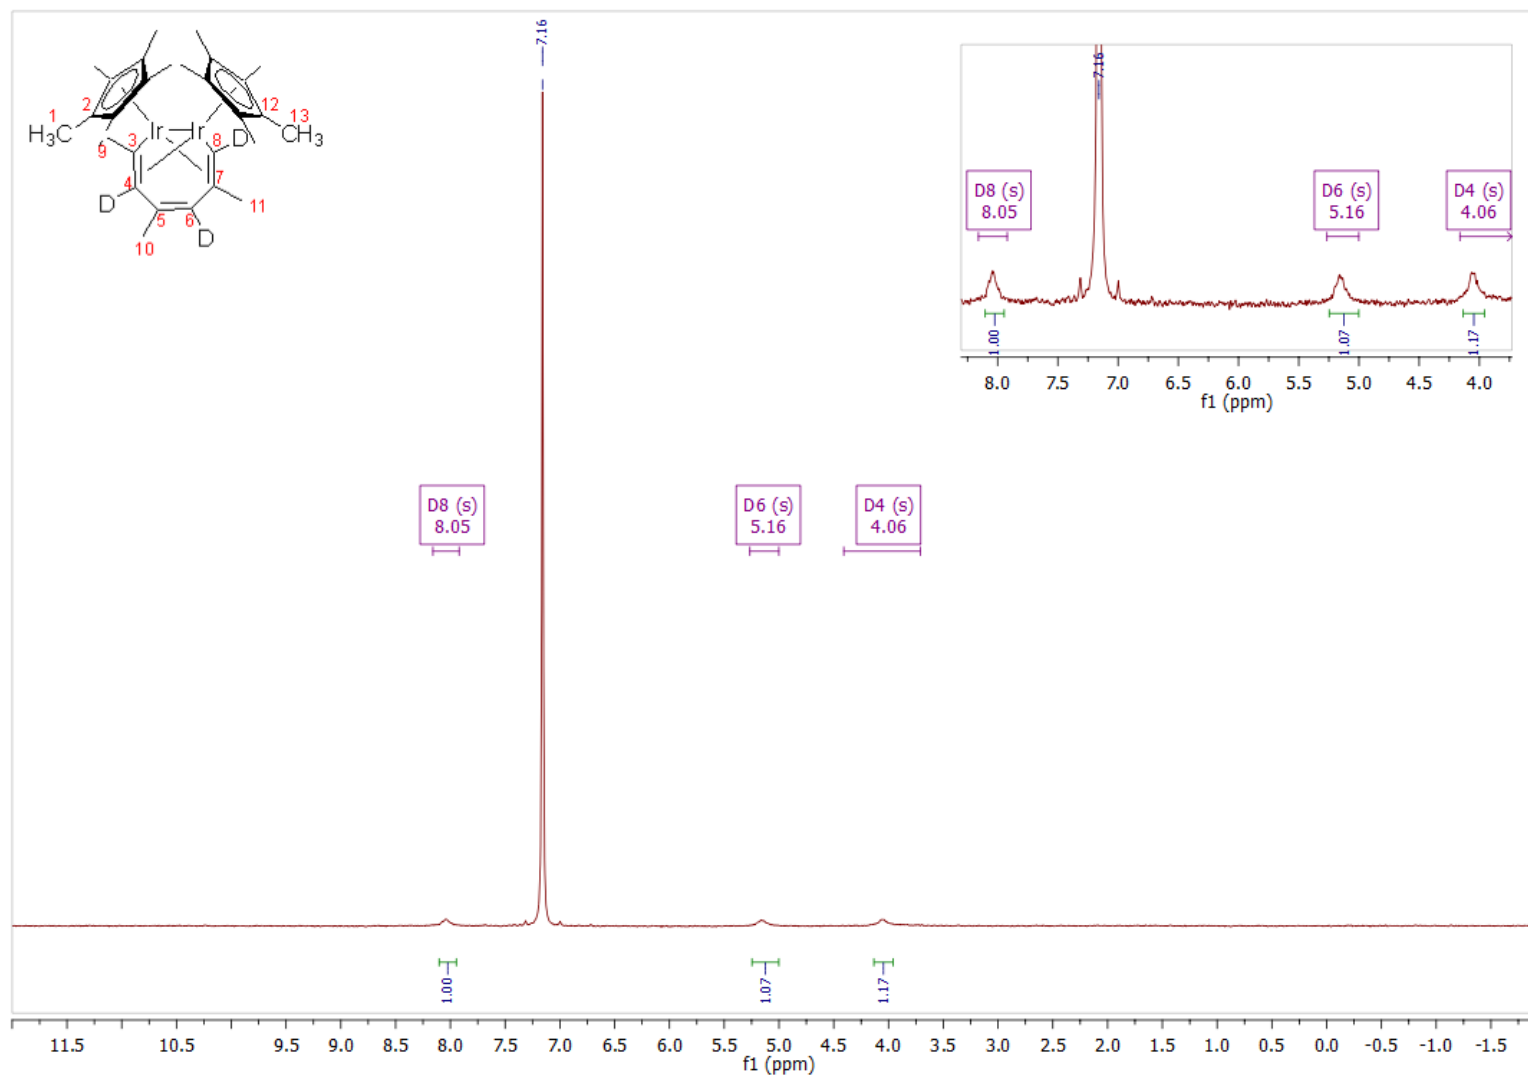



$^1\text{H}$  NMR spectrum of **2-d<sub>9</sub>** in  $\text{C}_6\text{D}_6$ .

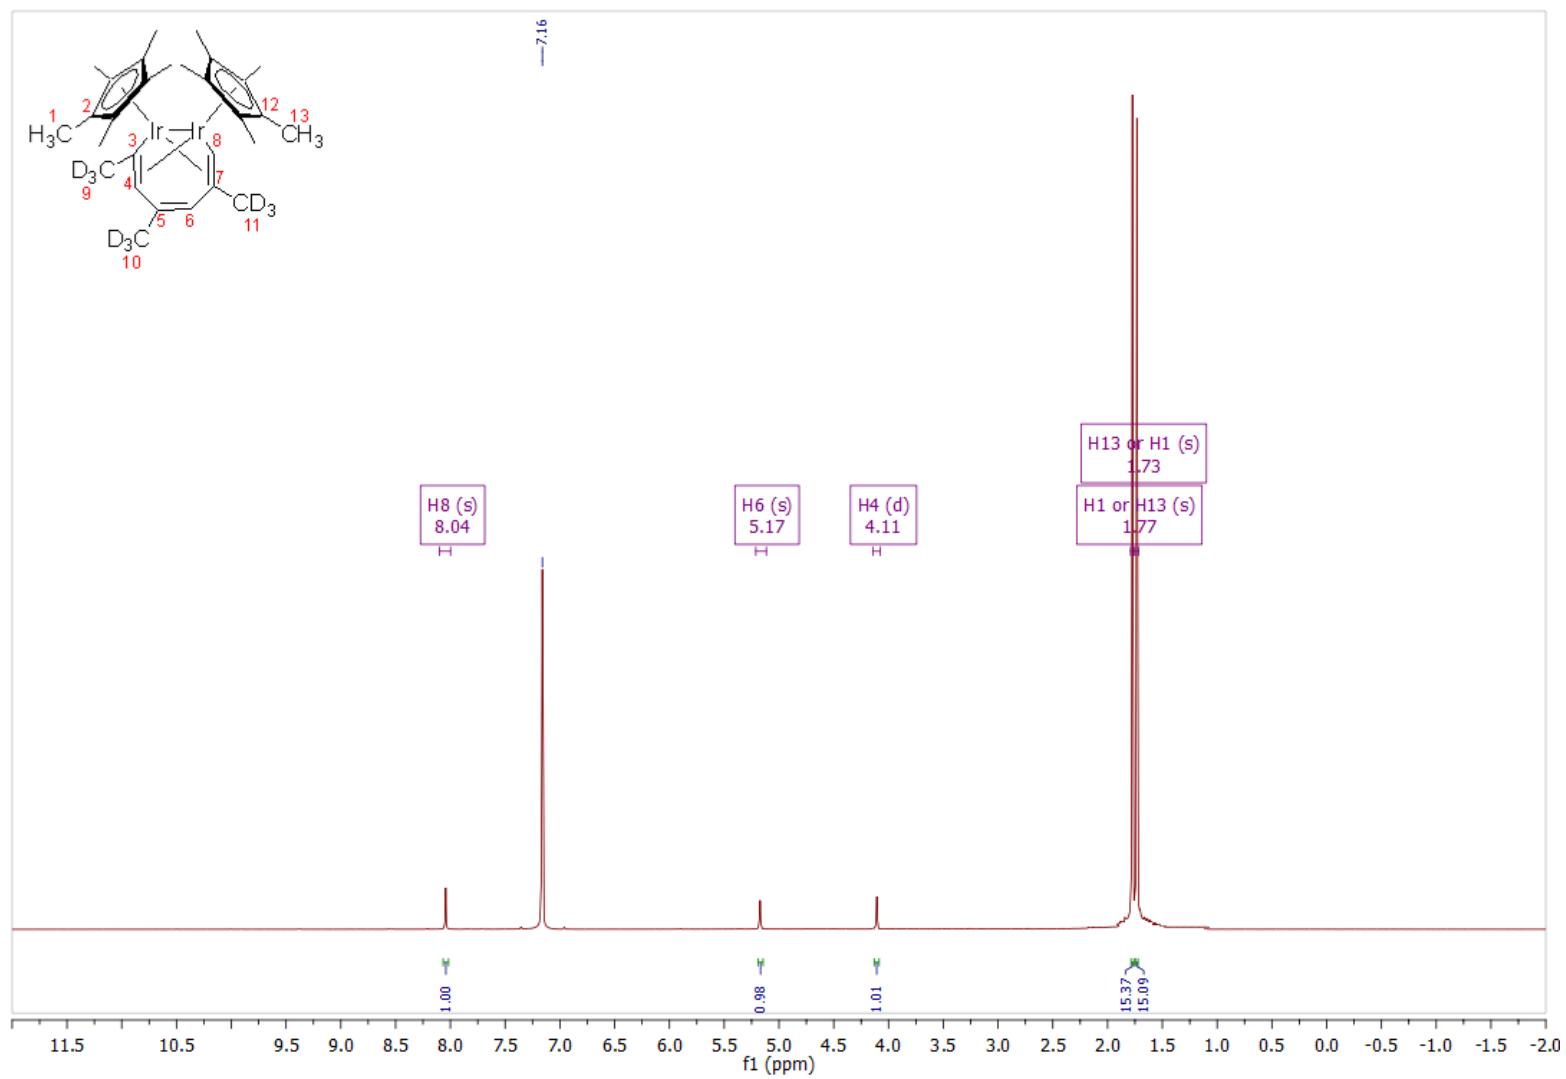

$^2\text{H}$  NMR spectrum of **2-d<sub>9</sub>** in  $\text{C}_6\text{H}_6$ .

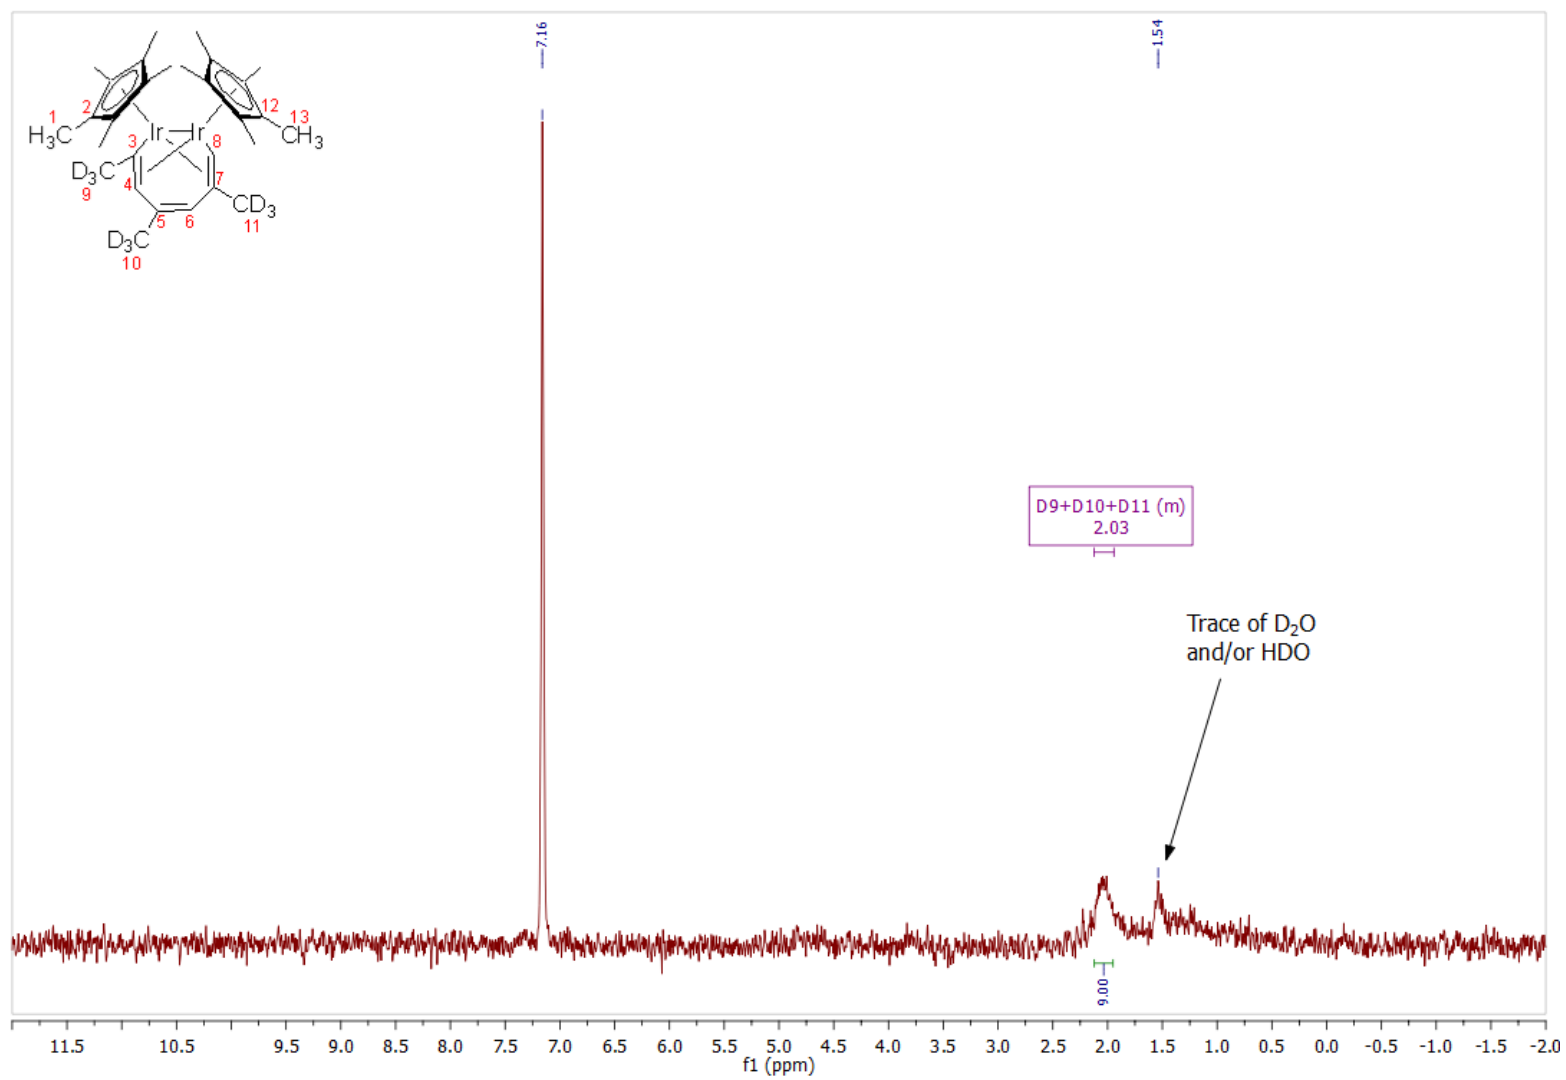

$^1\text{H}$  NMR spectrum of the reaction mixture of thermal cleavage of **1** in  $\text{C}_6\text{D}_6$  at full conversion of **1**.

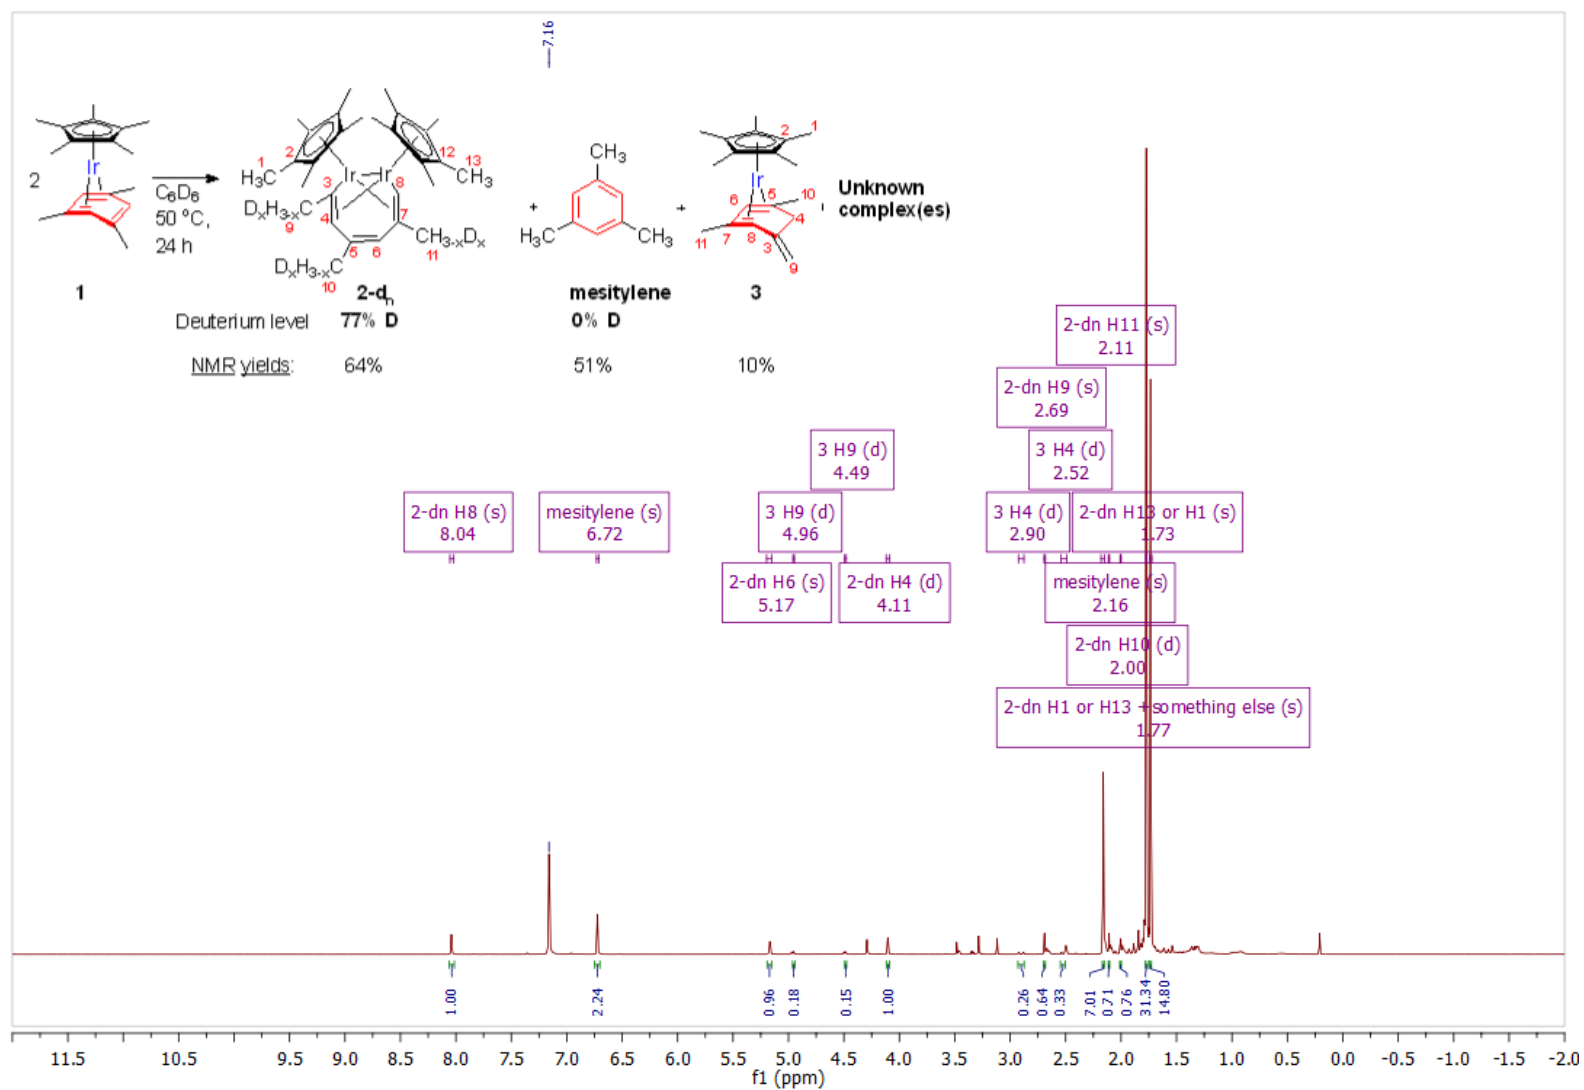

A low field region (8 to 4 ppm) of the  $^1\text{H}$  NMR spectrum of the reaction mixture of thermal cleavage of **1** in  $\text{C}_6\text{D}_6$  at full conversion of **1**.

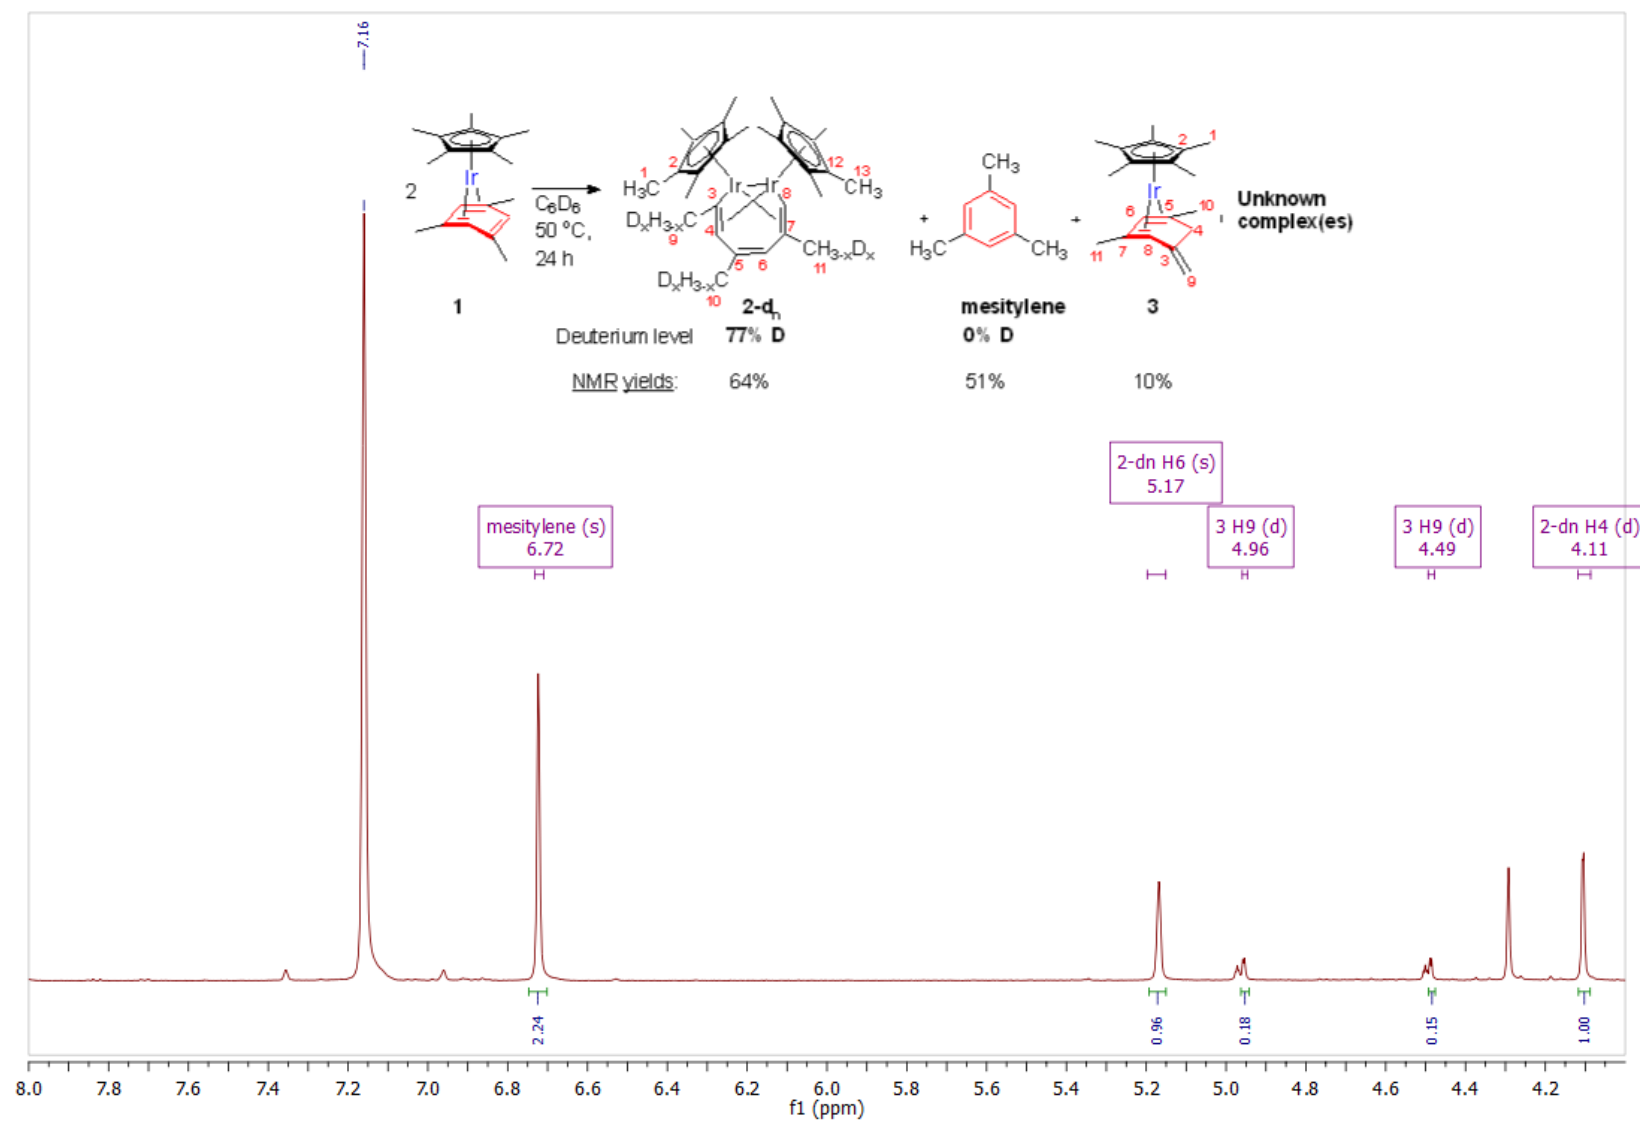

A high field region (4 to 0 ppm) of the  $^1\text{H}$  NMR spectrum of the reaction mixture of thermal cleavage of **1** in  $\text{C}_6\text{D}_6$  at full conversion of **1**.

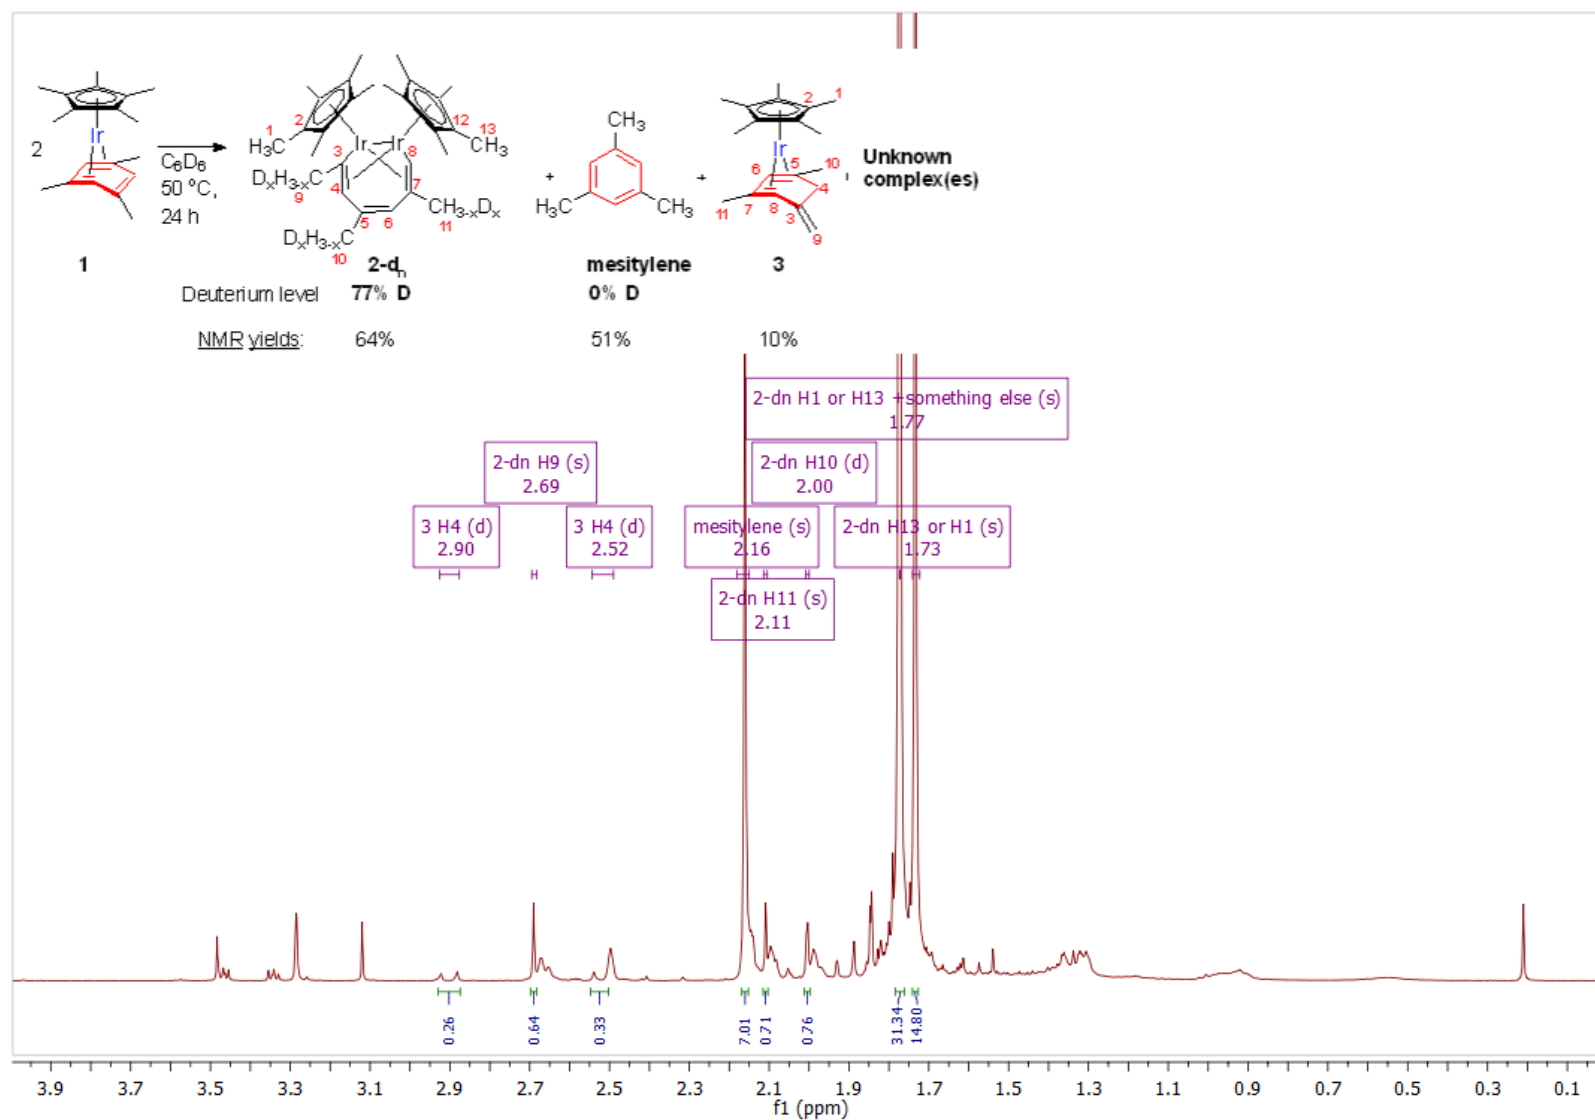

Overlaid  $^1\text{H}$  NMR spectra of **2** in  $\text{C}_6\text{D}_6$  and the reaction mixture of thermal cleavage of **1** in  $\text{C}_6\text{D}_6$  at full conversion of **1**.

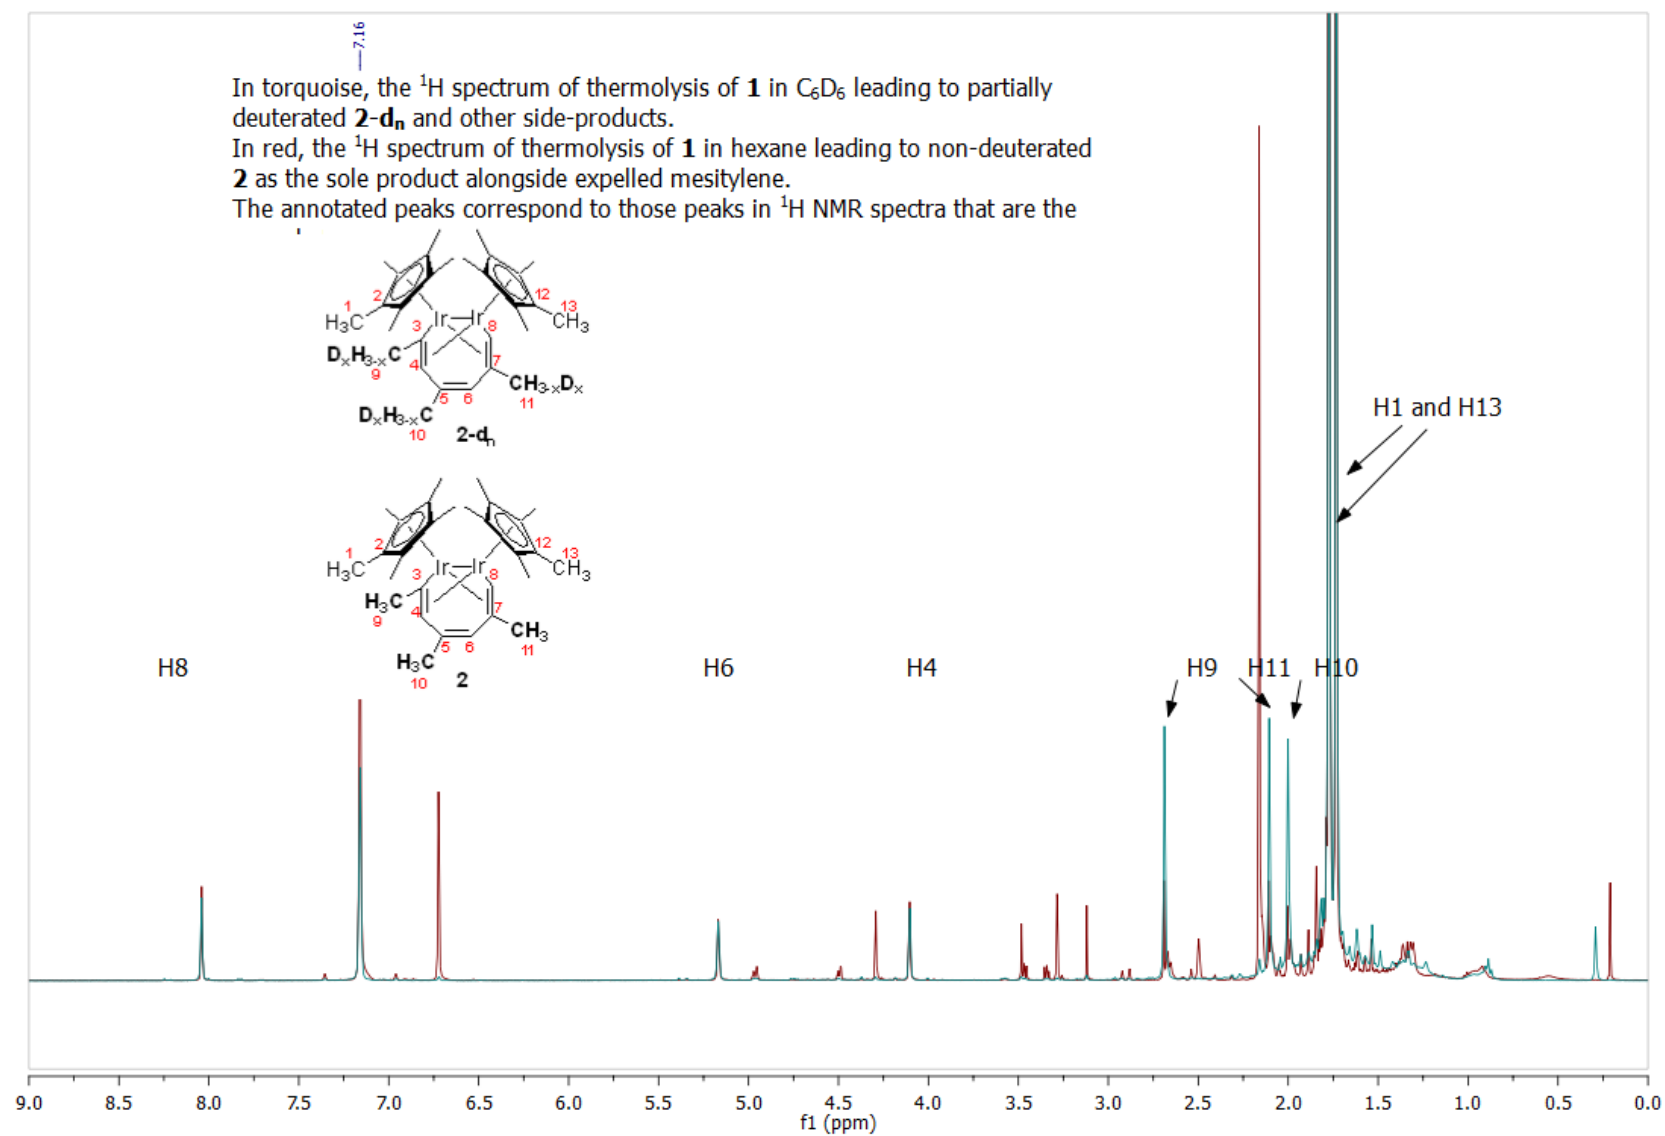

A 8.25 to 1.9 ppm region of the overlaid  $^1\text{H}$  NMR spectra of **2** in  $\text{C}_6\text{D}_6$  and the reaction mixture of thermal cleavage of **1** in  $\text{C}_6\text{D}_6$ .

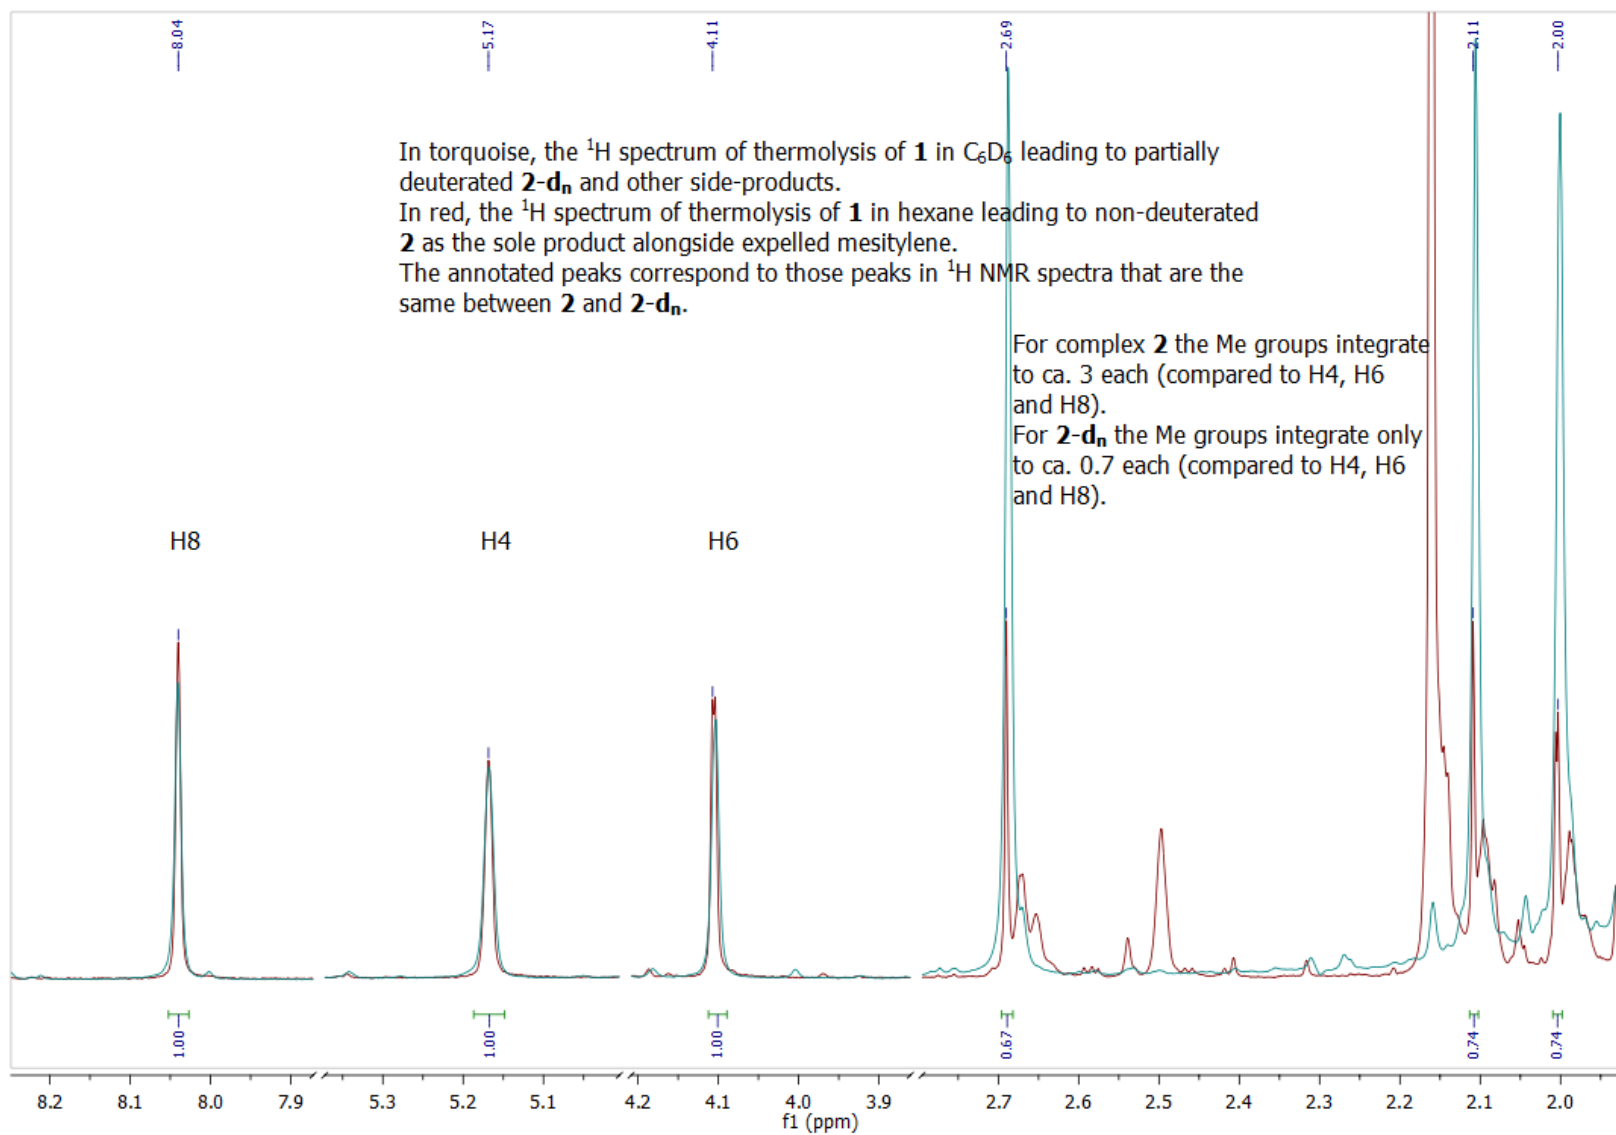

$^1\text{H}$  NMR spectrum of the reaction mixture of thermal cleavage of **1** in THF- $d_8$  at full conversion of **1**.

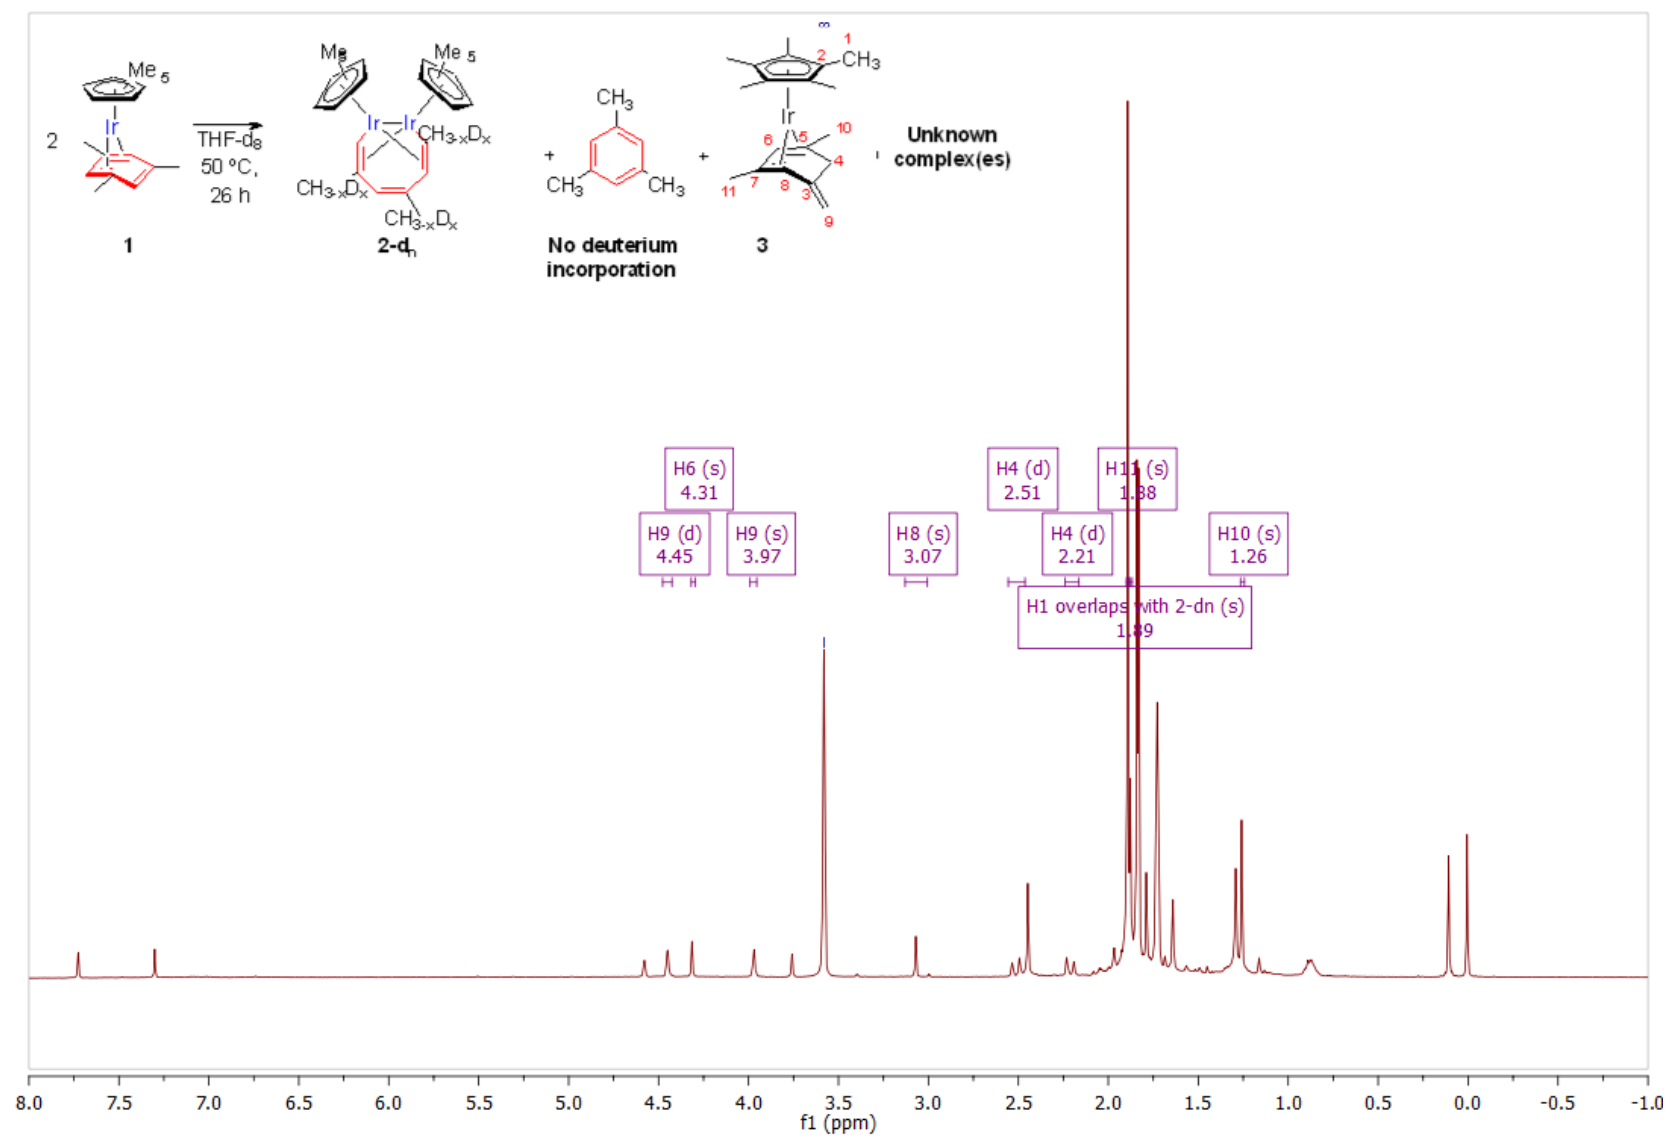



$^{13}\text{C}\{^1\text{H}\}$  NMR spectrum of the reaction mixture of thermal cleavage of **1** in THF- $d_8$  at full conversion of **1**.

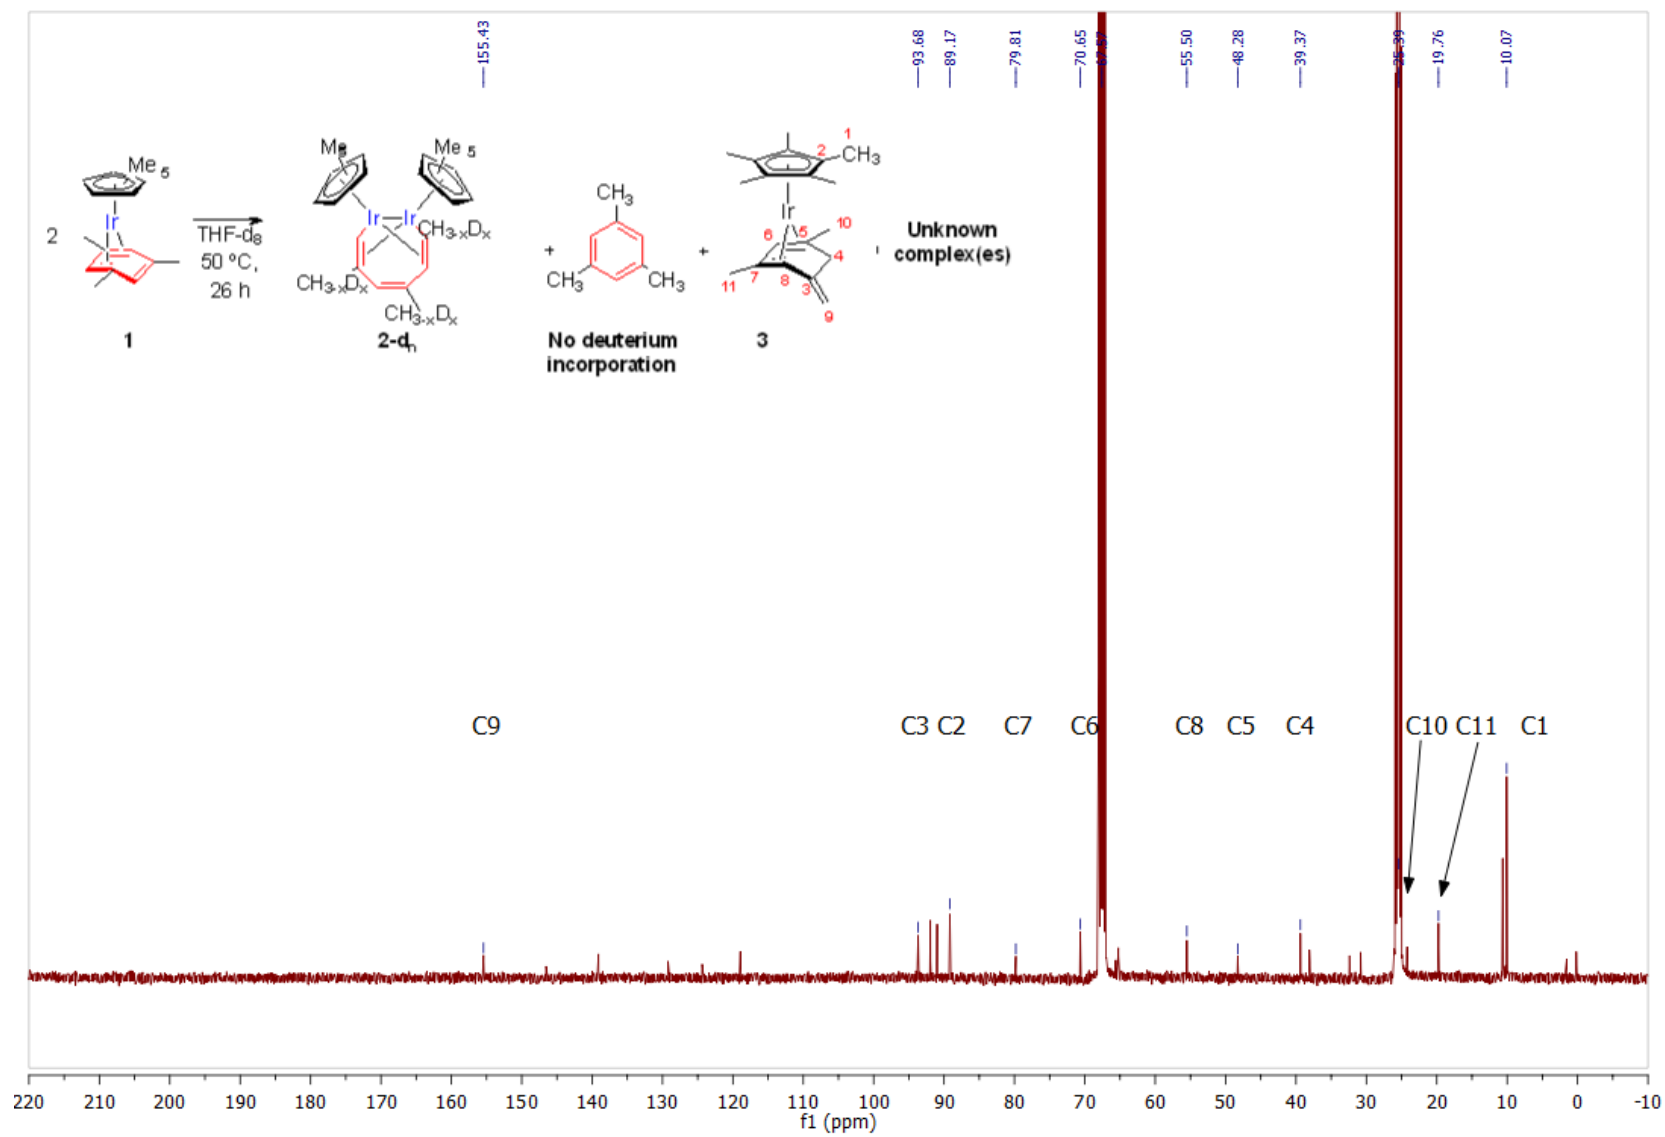

HSQC NMR spectrum of the reaction mixture of thermal cleavage of **1** in THF-d<sub>8</sub> at full conversion of **1**.

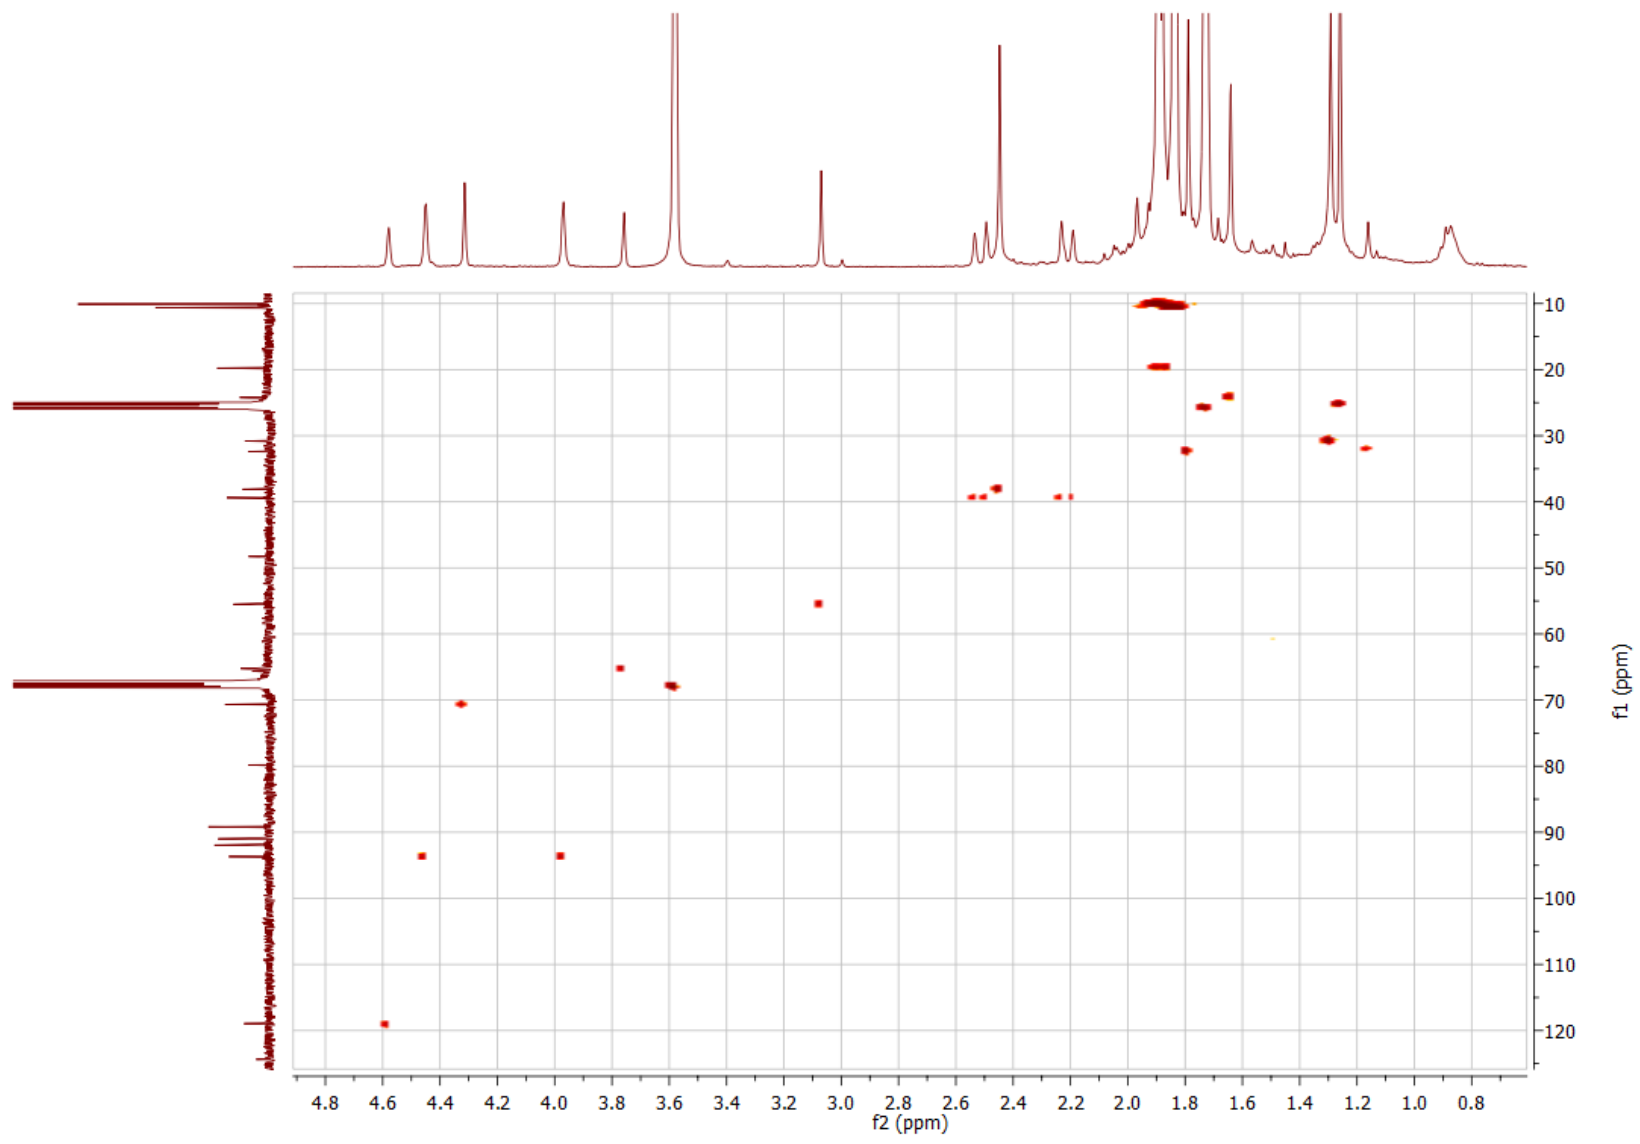

HMBC NMR spectrum of the reaction mixture of thermal cleavage of **1** in THF-d<sub>8</sub> at full conversion of **1**.

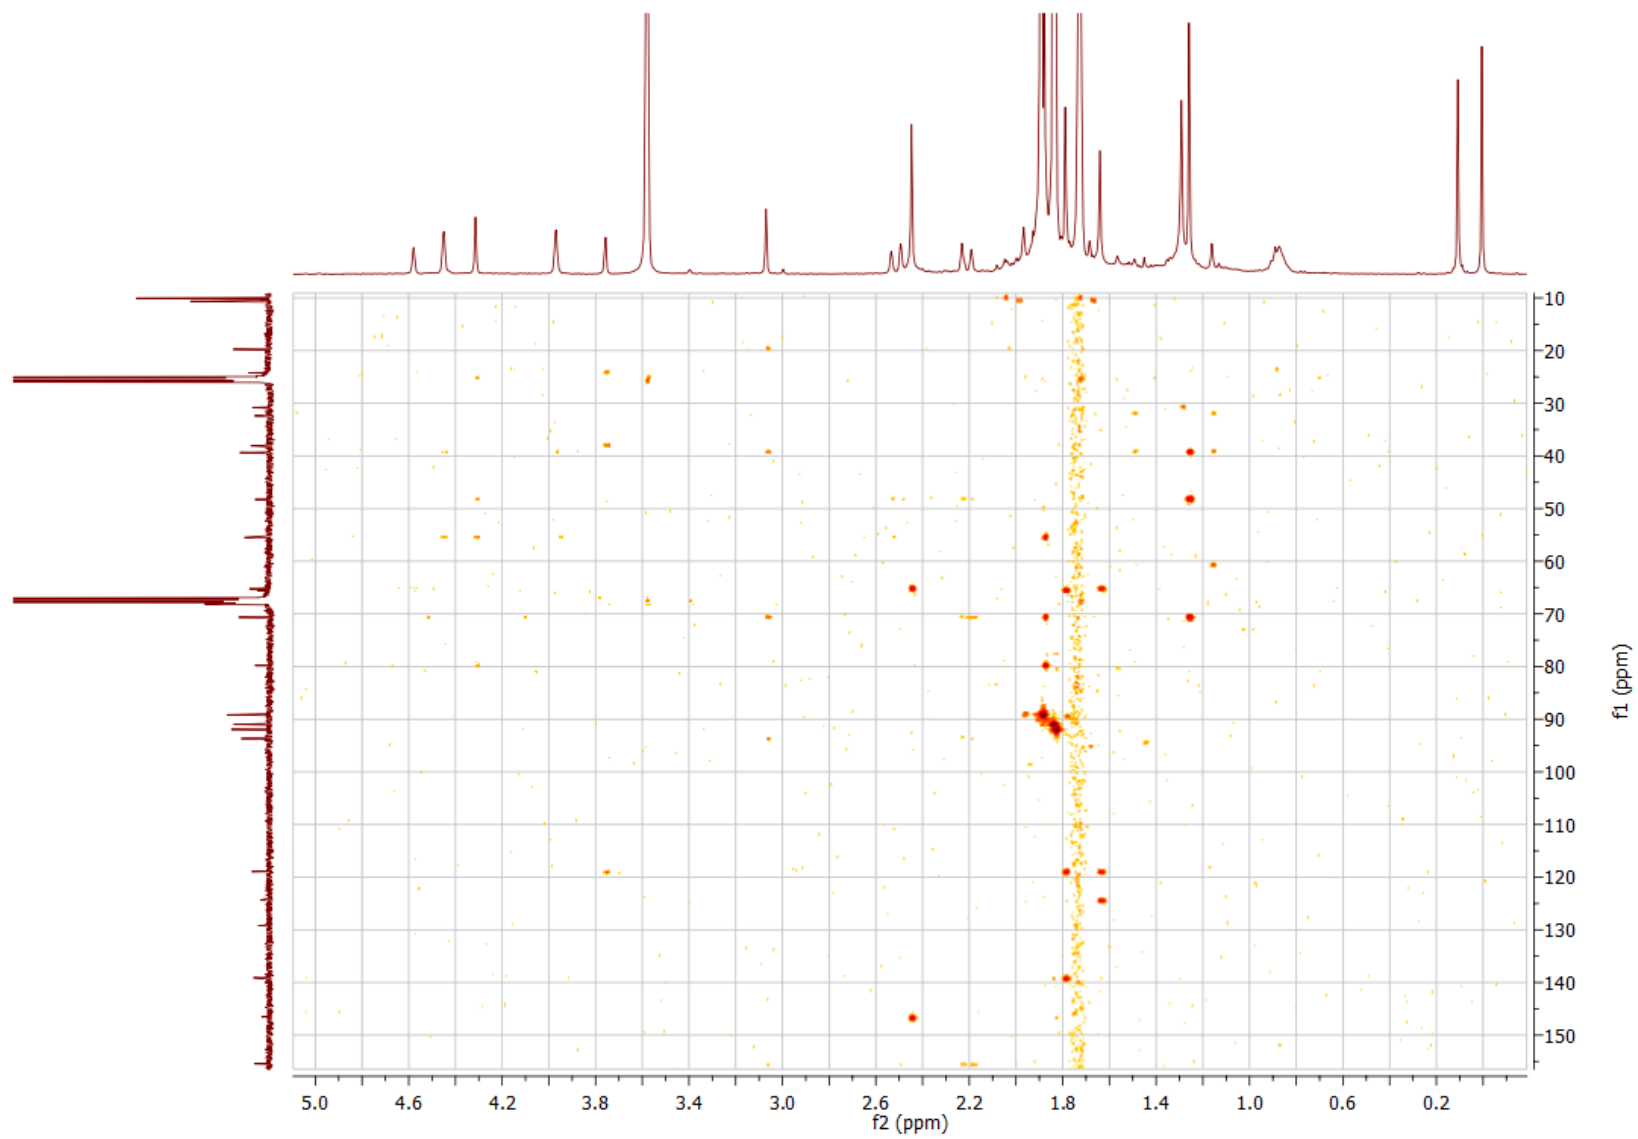

$^1\text{H}$  NMR spectrum of **4** in  $\text{C}_6\text{D}_6$ .

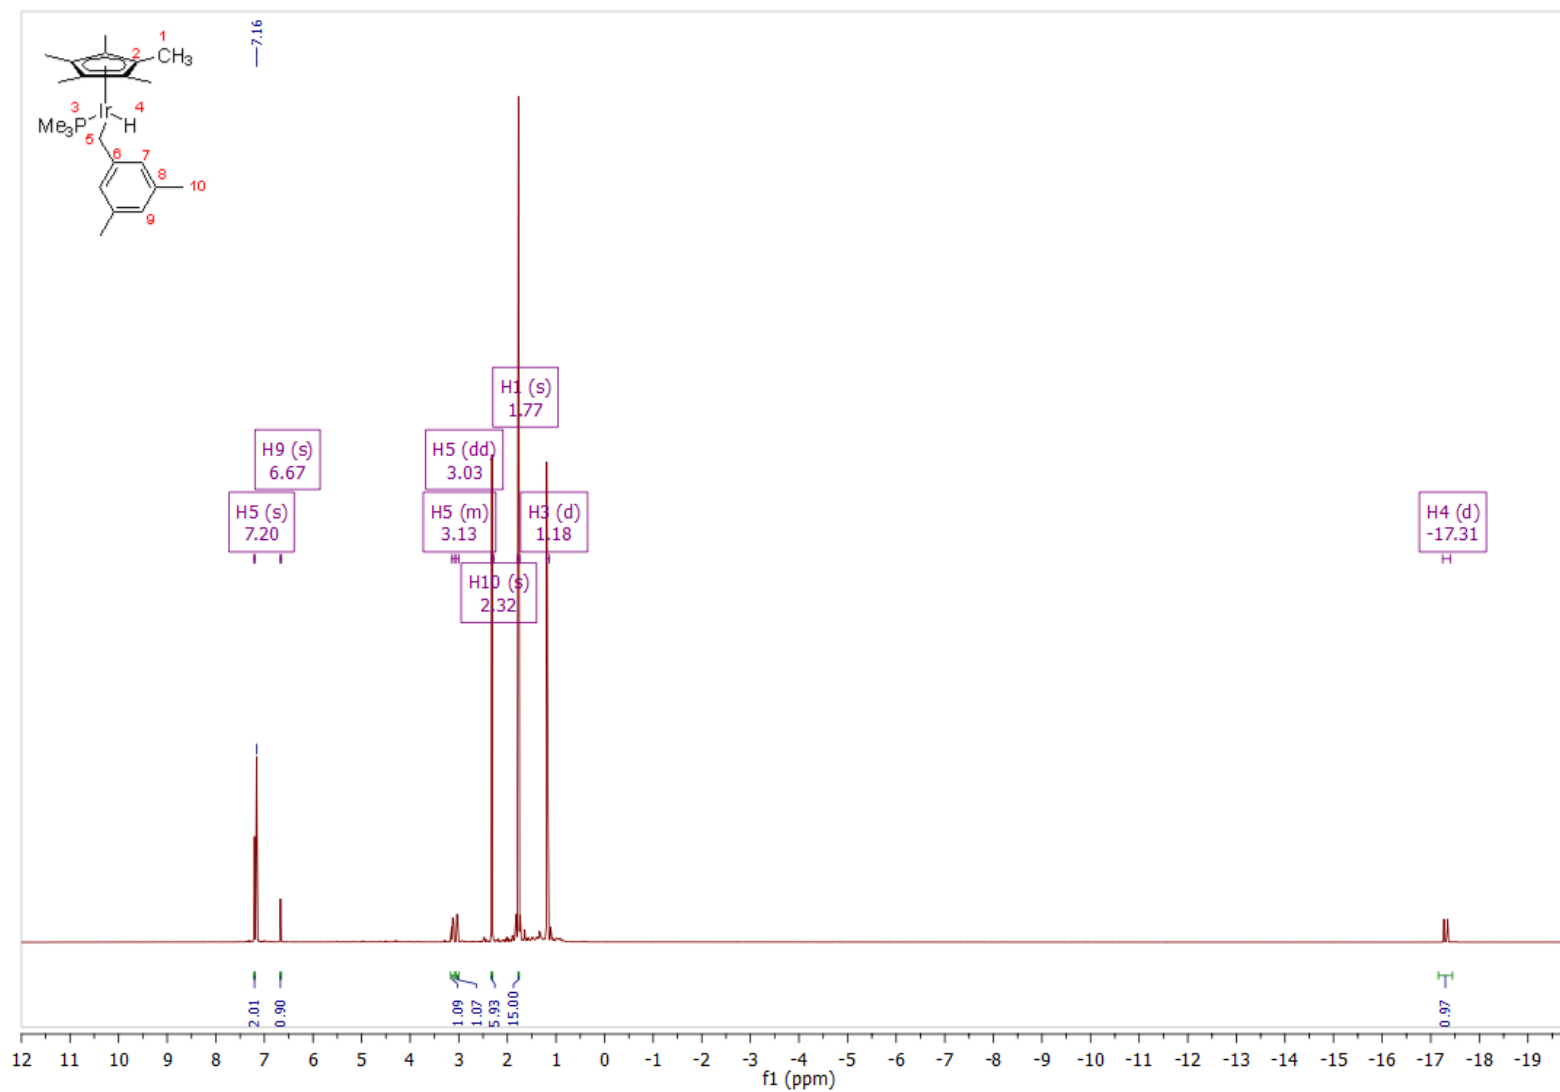

$^1\text{H}$  NMR spectrum of **4** in  $\text{C}_6\text{D}_6$ .

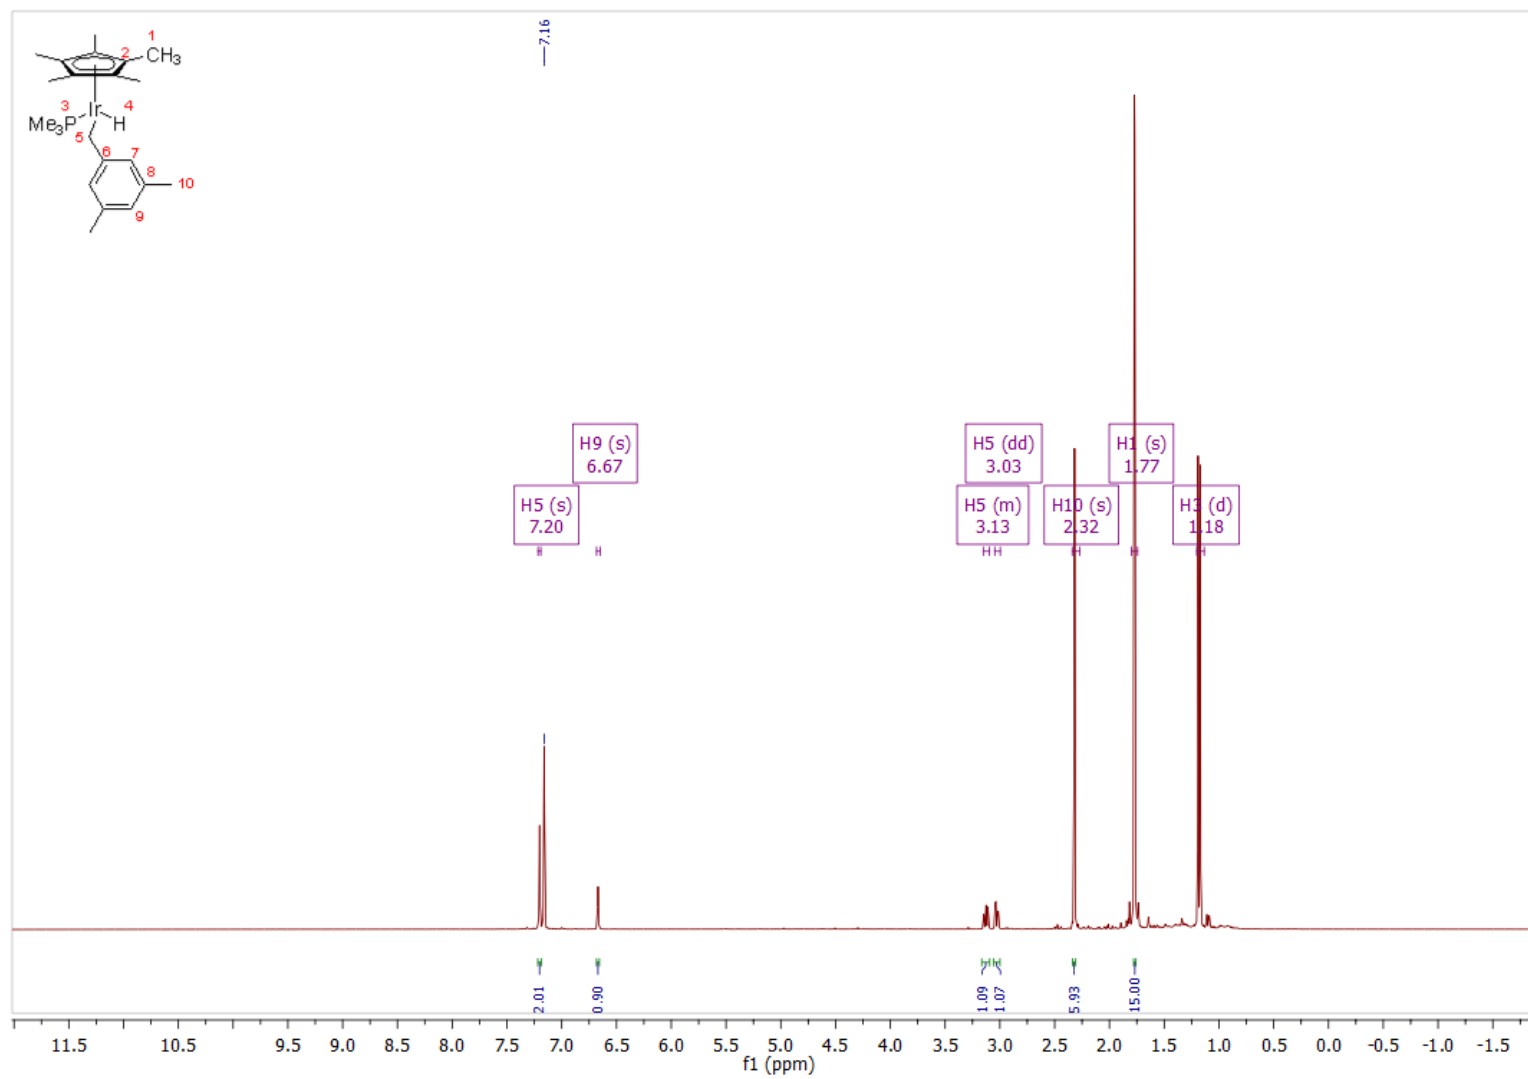

$^{13}\text{C}\{^1\text{H}\}$  NMR spectrum of **4** in  $\text{C}_6\text{D}_6$ .

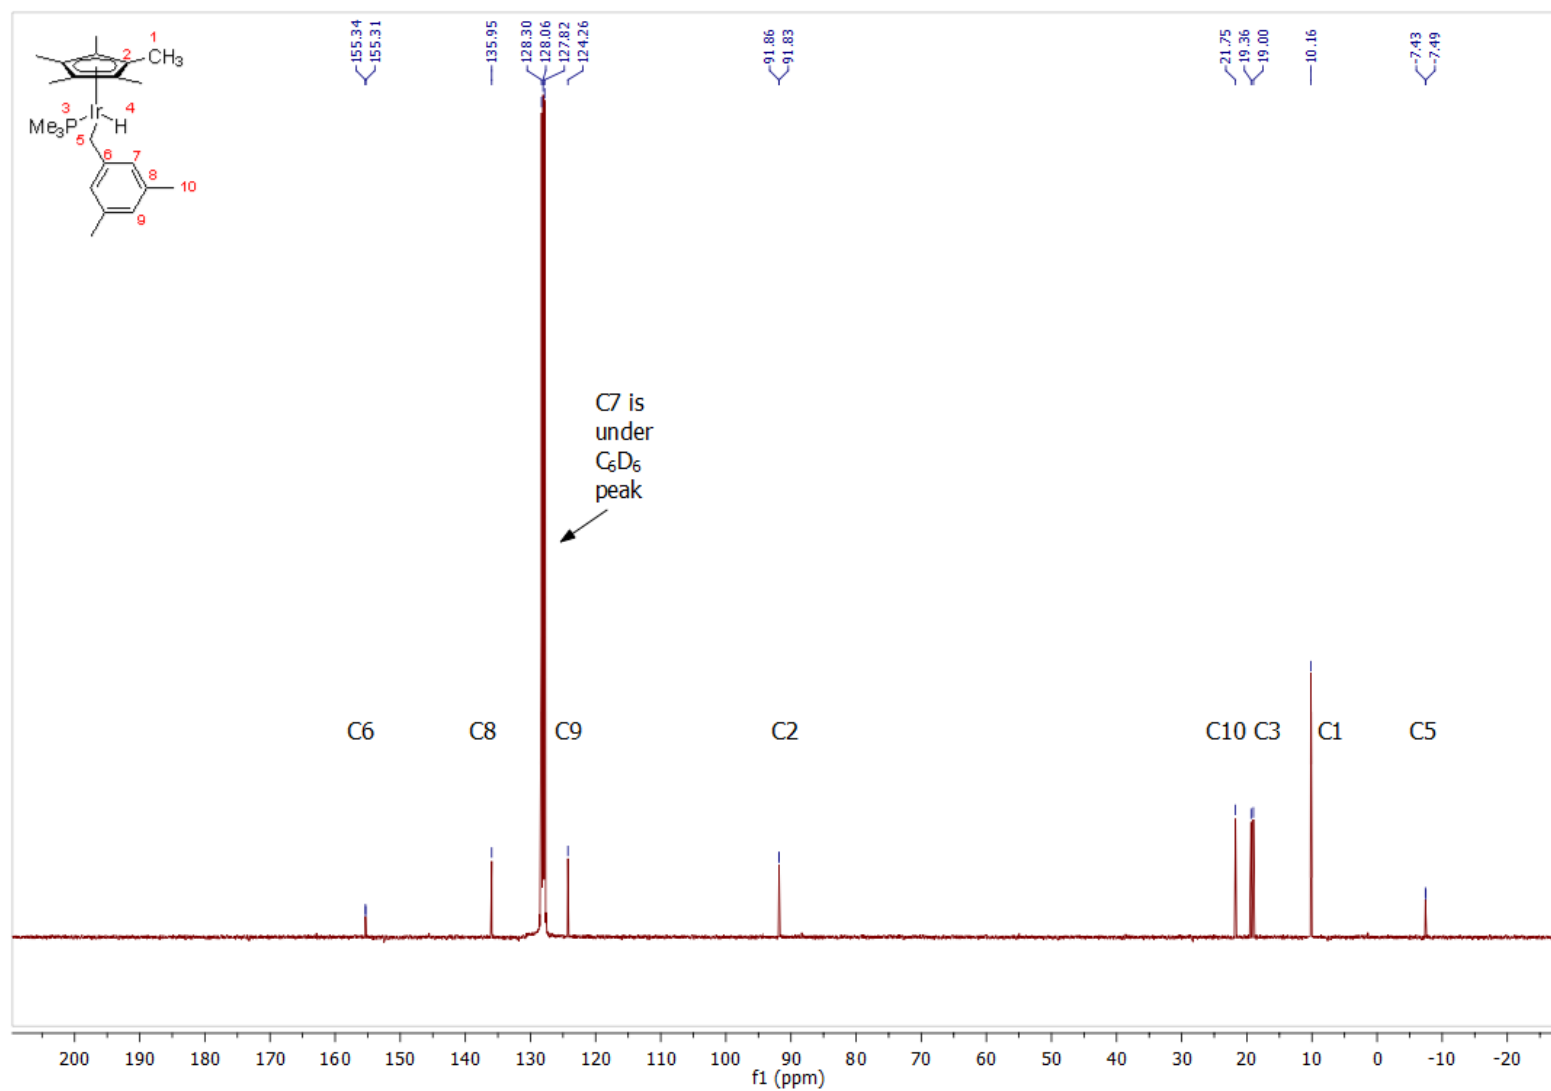

$^{31}\text{P}\{^1\text{H}\}$  NMR spectrum of **4** in  $\text{C}_6\text{D}_6$

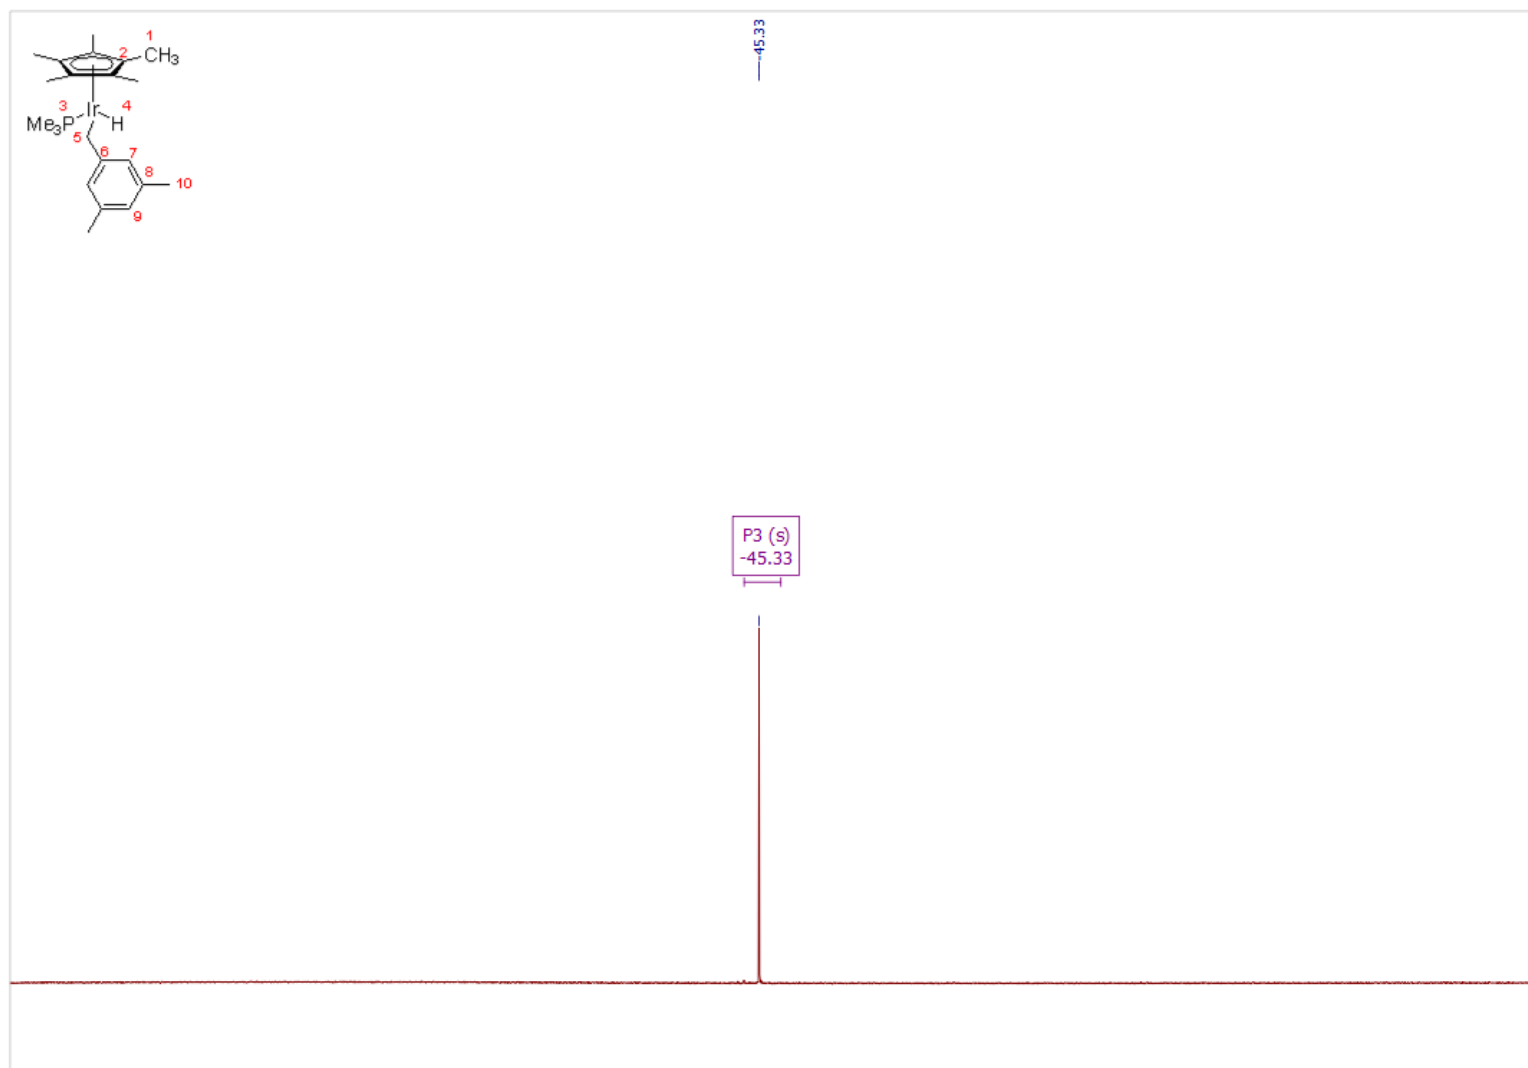

HSQC NMR spectrum of **4** in C<sub>6</sub>D<sub>6</sub>.

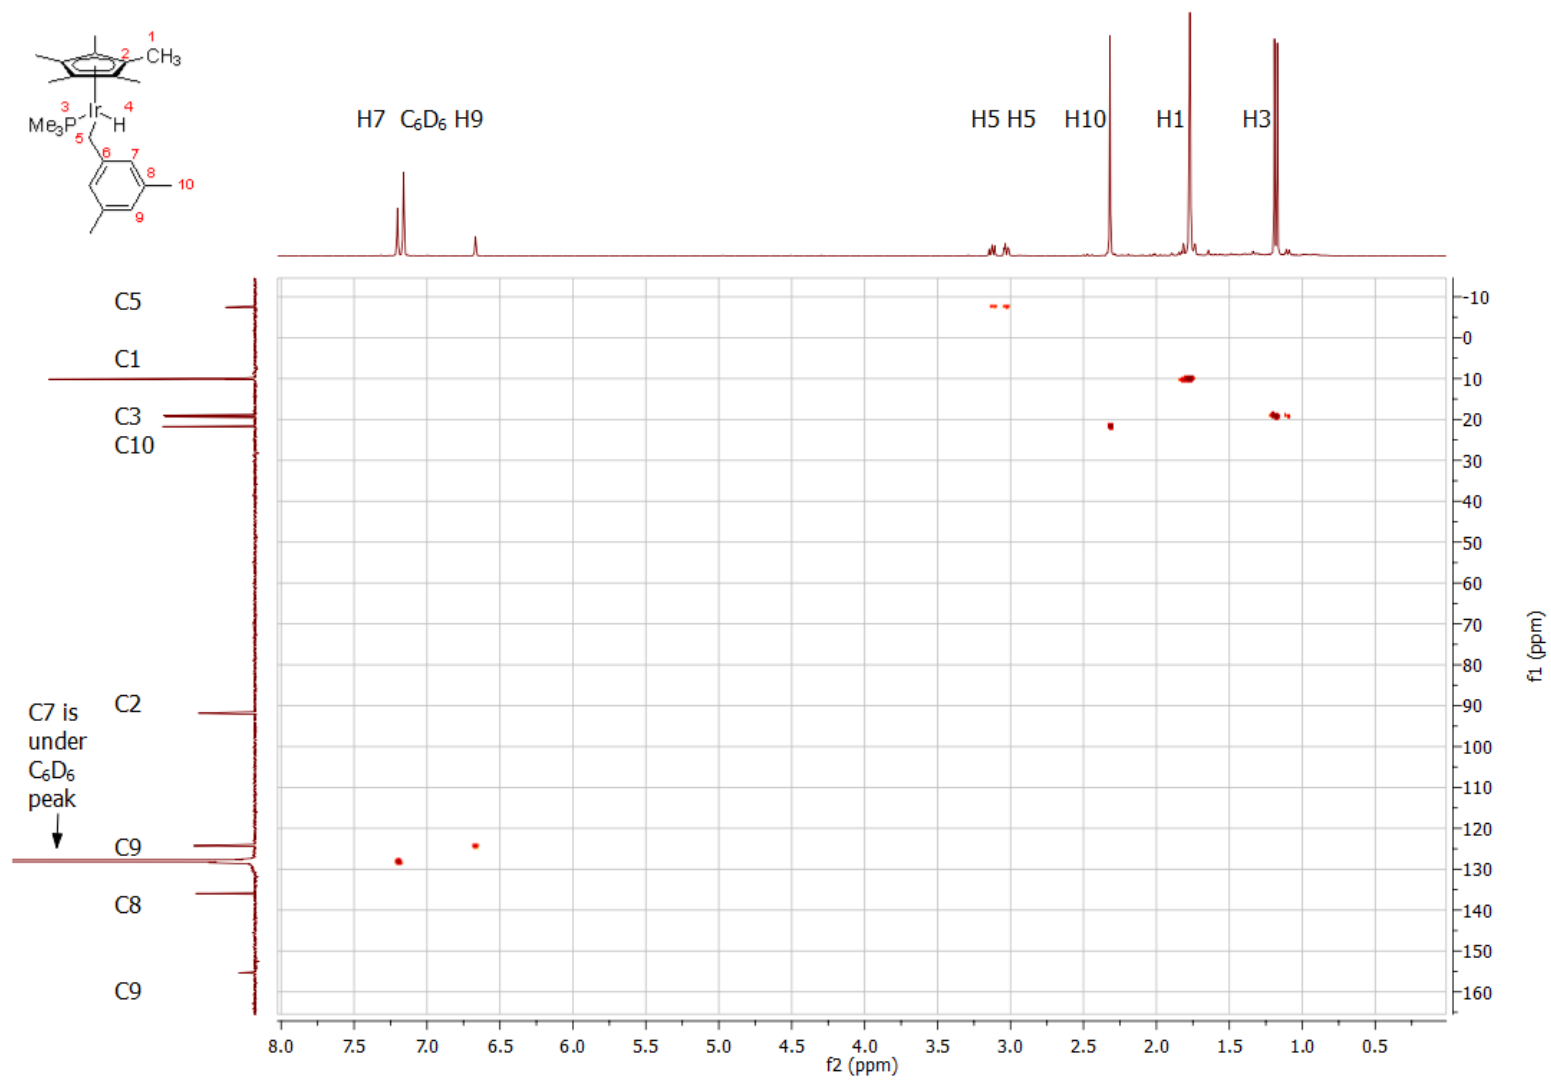



HMBC NMR spectrum of **4** in C<sub>6</sub>D<sub>6</sub>.

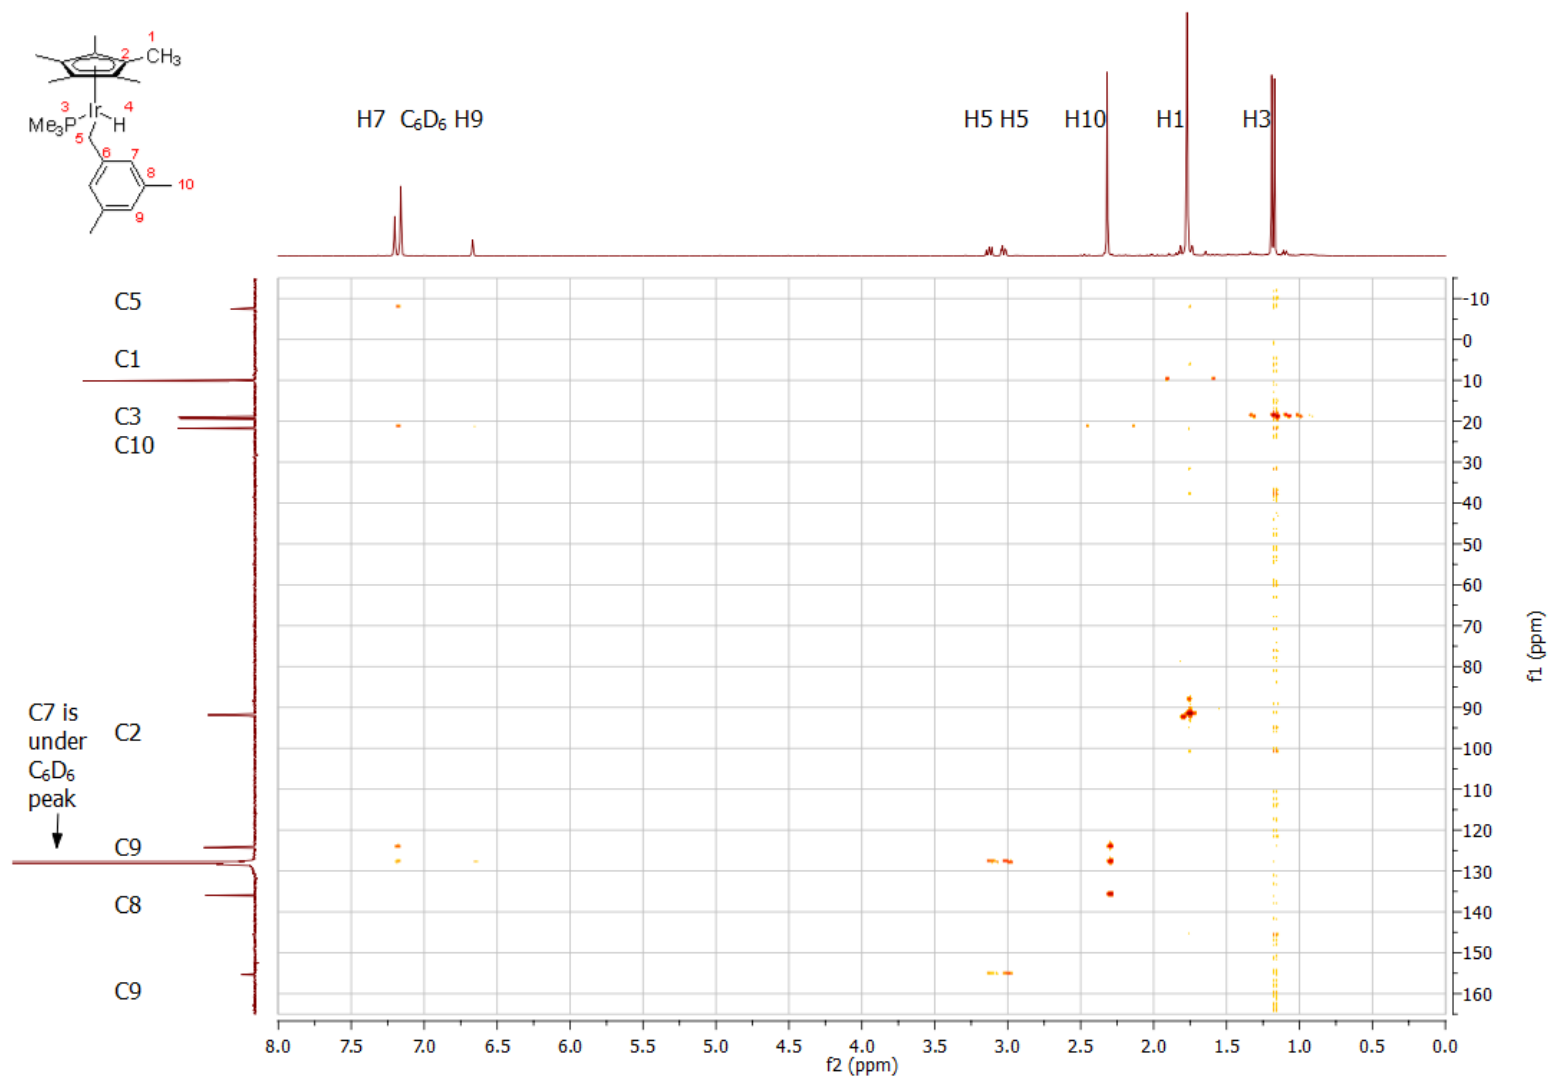

$^1\text{H}$  NMR spectrum of attempted cleavage of  $[\text{Cp}^*\text{Ir}(\eta^4\text{-C}_6\text{Me}_6)]$  (**39**) at 150 °C.

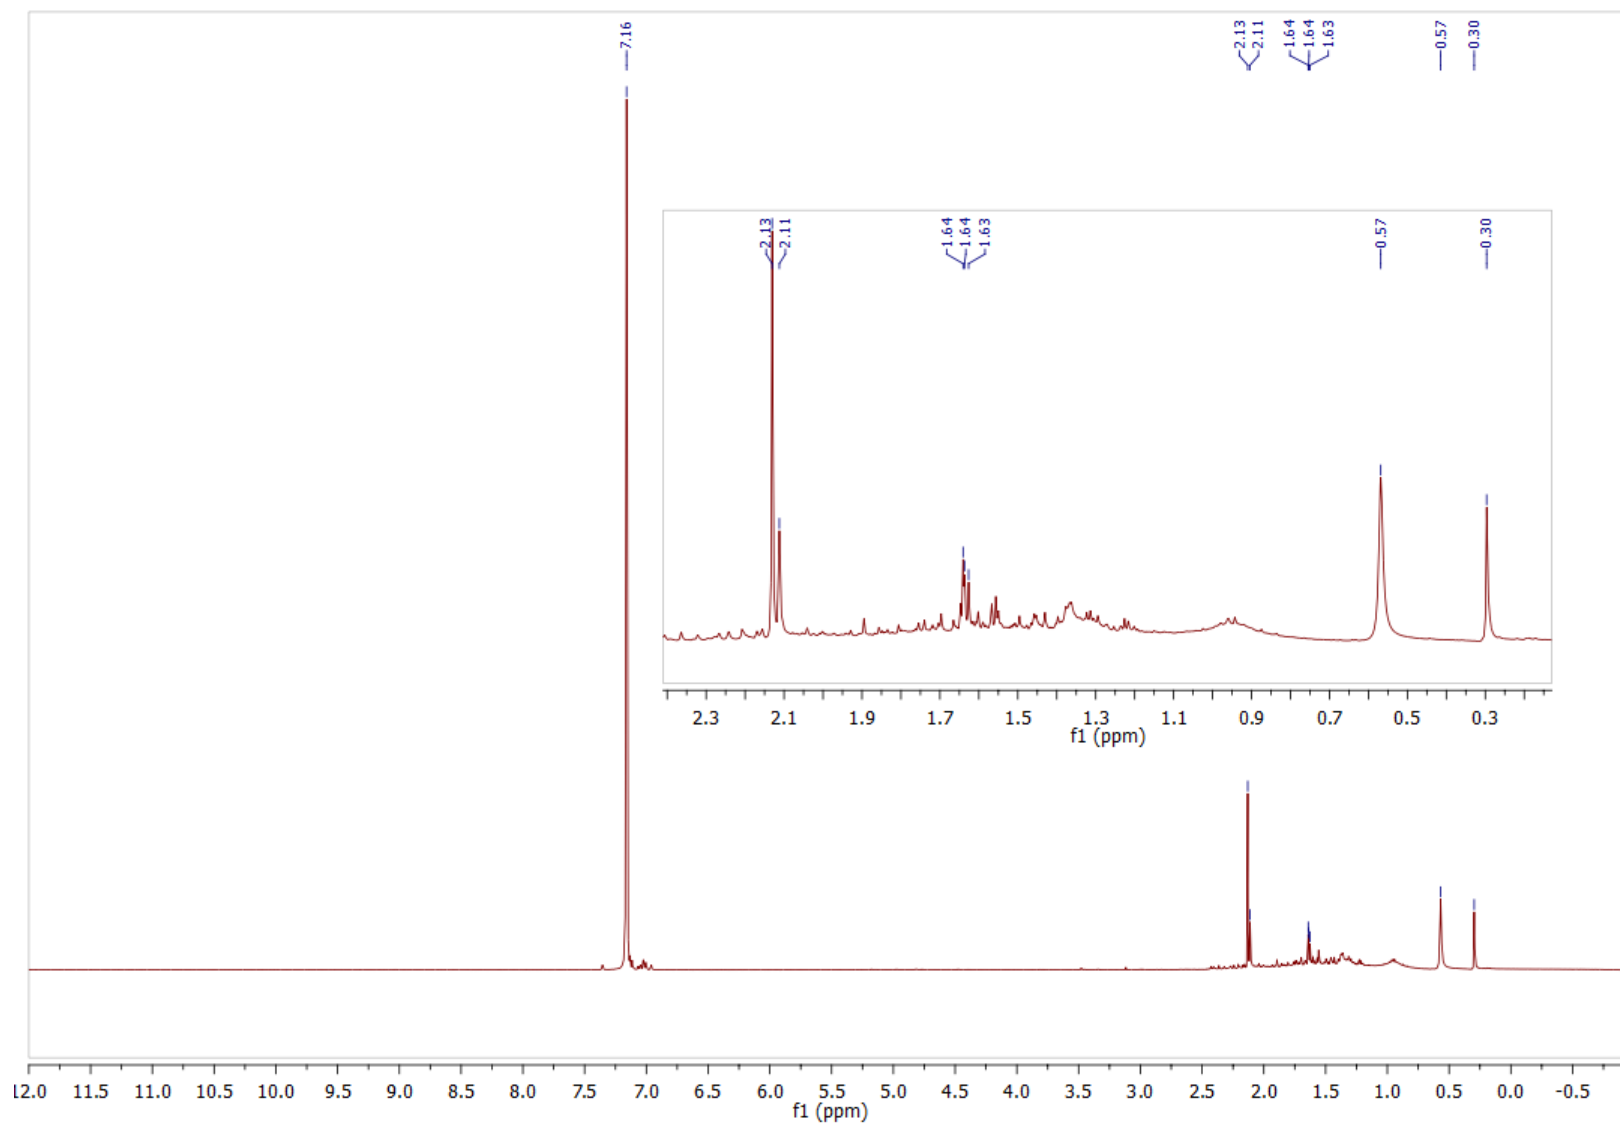

$^1\text{H}$  NMR spectrum of attempted cleavage of  $[\text{Cp}^*\text{Ir}(\eta^4\text{-naphthalene})]$  (**40**) at 150 °C.

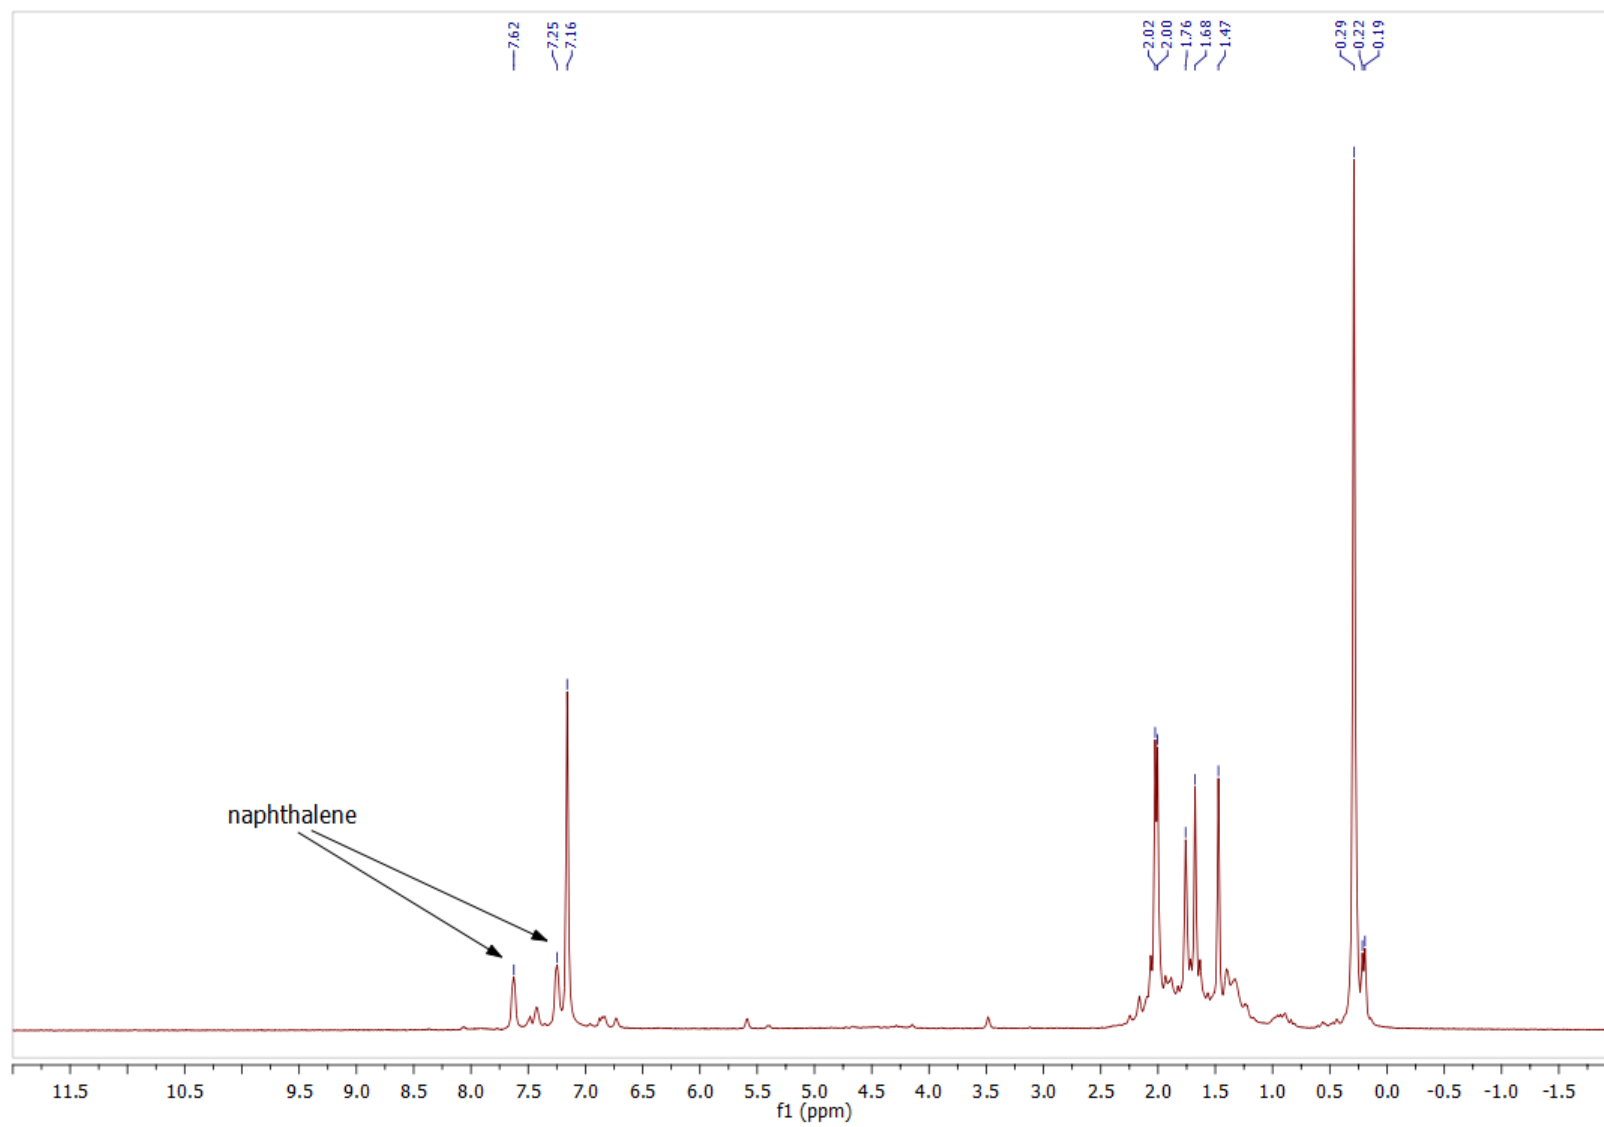

$^1\text{H}$  NMR spectrum of attempted cleavage of  $[\text{Cp}^*\text{Ir}(\eta^4\text{-2,6-dimethylnaphthalene)]$  (**41**) at 150 °C.

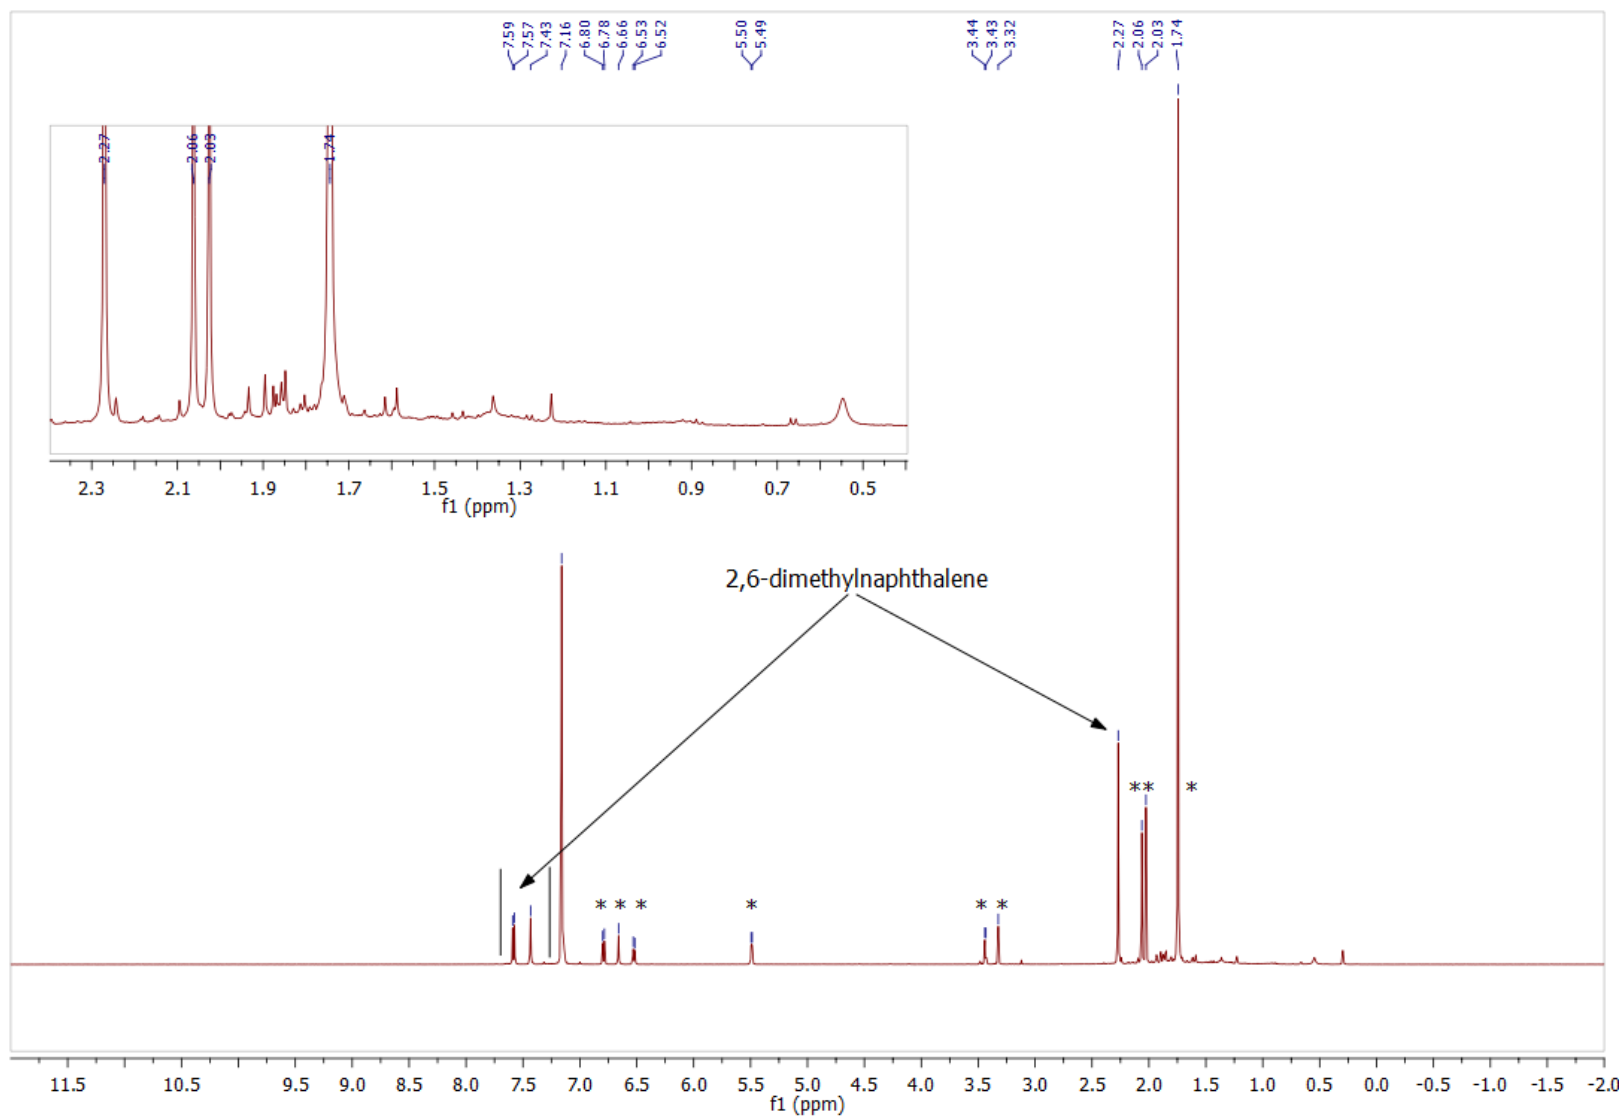

## 10. X-ray data

Single crystals of [Cp\*Ir( $\eta^4$ -C<sub>6</sub>Me<sub>6</sub>)] (**39**) and [Cp\*Ir( $\eta^4$ -naphthalene)] (**40**) were selected and mounted on a Mitegen loop using Paratone-N oil on a SuperNova, Dual, Cu at home/near, AtlasS2 diffractometer. The crystal was kept at 100.01(10) K during data collection. Using Olex2<sup>13</sup>, the structures were solved with the ShelXT<sup>14</sup> structure solution program using Intrinsic Phasing and refined with the ShelXL<sup>15</sup> refinement package using Least Squares minimisation. The twin law for **39** was determined using CrysAlisPRO<sup>16</sup> and was found to be a 180 degree rotation about 1 0 0 (dir), or alternatively the twin matrix is: (1 0 0, 0 -1 0, -0.19 0 -1) and the refined mass fractions for the two components determined as 0.5285(12) and 0.4715(12).

**Table S20.** Crystallographic data and structure refinement for  $\eta^4$ -complexes.

| Complex                                | [Cp*Ir( $\eta^4$ -C <sub>6</sub> Me <sub>6</sub> )] ( <b>39</b> ) | [Cp*Ir( $\eta^4$ -naphthalene)] ( <b>40</b> )                     |
|----------------------------------------|-------------------------------------------------------------------|-------------------------------------------------------------------|
| CCDC number*                           | 2040076                                                           | 2040077                                                           |
| Empirical formula                      | C <sub>22</sub> H <sub>33</sub> Ir                                | C <sub>40</sub> H <sub>46</sub> Ir <sub>2</sub>                   |
| Formula weight                         | 489.68                                                            | 911.17                                                            |
| Temperature/K                          | 100.01(10)                                                        | 100.01(10)                                                        |
| Crystal system                         | monoclinic                                                        | monoclinic                                                        |
| Space group                            | P2 <sub>1</sub> /n                                                | Cc                                                                |
| a/Å                                    | 8.01647(19)                                                       | 22.2884(4)                                                        |
| b/Å                                    | 16.3246(4)                                                        | 22.2818(4)                                                        |
| c/Å                                    | 15.0490(4)                                                        | 26.1267(5)                                                        |
| $\alpha$ /°                            | 90                                                                | 90                                                                |
| $\beta$ /°                             | 92.985(2)                                                         | 97.5244(17)                                                       |
| $\gamma$ /°                            | 90                                                                | 90                                                                |
| Volume/Å <sup>3</sup>                  | 1966.73(9)                                                        | 12863.5(4)                                                        |
| Z                                      | 4                                                                 | 16                                                                |
| $\rho_{\text{calc}}/\text{cm}^3$       | 1.654                                                             | 1.882                                                             |
| $\mu/\text{mm}^{-1}$                   | 13.098                                                            | 8.295                                                             |
| F(000)                                 | 968.0                                                             | 7040.0                                                            |
| Crystal size/mm <sup>3</sup>           | 0.26 × 0.106 × 0.071                                              | 0.08 × 0.06 × 0.04                                                |
| Radiation                              | CuK $\alpha$ ( $\lambda$ = 1.54184)                               | MoK $\alpha$ ( $\lambda$ = 0.71073)                               |
| 2 $\theta$ range for data collection/° | 7.996 to 153.248                                                  | 4.822 to 59.546                                                   |
| Index ranges                           | -10 ≤ h ≤ 10, -20 ≤ k ≤ 20,<br>-18 ≤ l ≤ 18                       | -28 ≤ h ≤ 30, -29 ≤ k ≤ 28,<br>-36 ≤ l ≤ 33                       |
| Reflections collected                  | 5009                                                              | 96652                                                             |
| Independent reflections                | 5009 [R <sub>merge</sub> = , R <sub>sigma</sub> =<br>0.0187]      | 31301 [R <sub>int</sub> = 0.0334,<br>R <sub>sigma</sub> = 0.0416] |
| Data/restraints/parameters             | 5009/12/214                                                       | 31301/388/1553                                                    |
| Goodness-of-fit on F <sup>2</sup>      | 1.084                                                             | 0.998                                                             |

|                                                |                                  |                                  |
|------------------------------------------------|----------------------------------|----------------------------------|
| Final R indexes [ $I \geq 2\sigma(I)$ ]        | $R_1 = 0.0342$ , $wR_2 = 0.0893$ | $R_1 = 0.0264$ , $wR_2 = 0.0473$ |
| Final R indexes [all data]                     | $R_1 = 0.0379$ , $wR_2 = 0.0911$ | $R_1 = 0.0433$ , $wR_2 = 0.0530$ |
| Largest diff. peak/hole / $e \text{ \AA}^{-3}$ | 1.59/-1.42                       | 2.56/-0.92                       |
| Flack parameter                                |                                  | -0.015(5)                        |

\*Crystallographic files can be obtained free of charge from: [ccdc.cam.ac.uk](http://ccdc.cam.ac.uk).

**Table 21.** Selected C-C bond lengths and angles for  $[\text{Cp}^*\text{Ir}(\eta^4\text{-C}_6\text{Me}_6)]$  (**39**) and  $[\text{Cp}^*\text{Ir}(\eta^4\text{-naphthalene})]$  (**40**).

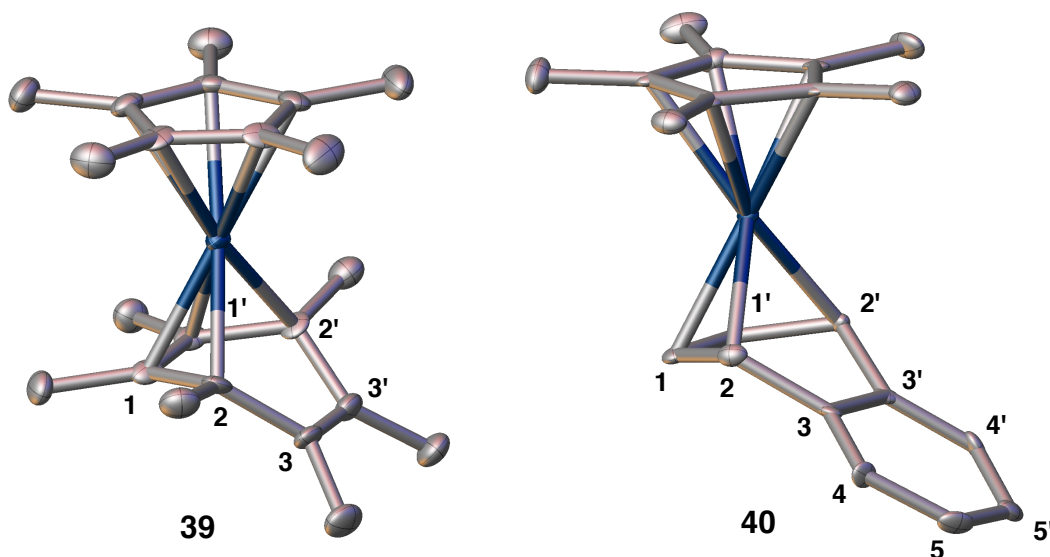

| $[\text{Cp}^*\text{Ir}(\eta^4\text{-C}_6\text{Me}_6)]$ ( <b>39</b> ) |                            | $[\text{Cp}^*\text{Ir}(\eta^4\text{-naphthalene})]$ ( <b>40</b> ) |                              |
|----------------------------------------------------------------------|----------------------------|-------------------------------------------------------------------|------------------------------|
|                                                                      | Bond lengths, $\text{\AA}$ |                                                                   | Bond lengths, $\text{\AA}$ * |
| C1-C1'                                                               | 1.435(8)                   | C1-C1'                                                            | 1.423(13)                    |
| C1-C2                                                                | 1.487(8)                   | C1-C2                                                             | 1.460(12)                    |
| C2-C3                                                                | 1.513(8)                   | C2-C3                                                             | 1.487(12)                    |
| C3-C3'                                                               | 1.328(9)                   | C3-C3'                                                            | 1.406(12)                    |
| C1'-C2'                                                              | 1.463(8)                   | C3-C4                                                             | 1.385(13)                    |
| C2'-C3'                                                              | 1.511(8)                   | C4-C5                                                             | 1.391(14)                    |
|                                                                      |                            | C5-C5'                                                            | 1.381(14)                    |
| Bending angle $\alpha$ (torsion angle C3-C2-C1-C1'), $^\circ$        |                            | Bending angle $\alpha$ (torsion angle C3-C2-C1-C1'), $^\circ$     |                              |
| 45.9                                                                 |                            | 43.7                                                              |                              |

\*Selected bond lengths are from only one out of eight molecules present in unit cell.

## 11. References

1. Jakoobi, M.; Halcovitch, N.; Whitehead, G. F. S.; Sergeev, A. G., *Angew. Chem. Int. Ed.* **2017**, *56*, 3266-3269.
2. Rybinskaya, M. I.; Kudinov, A. R.; Kaganovich, V. S., *J. Organomet. Chem.* **1983**, *246*, 279-285.
3. Chen, T. S.; Wolinska - Mocydlarz, J.; Leitch, L. C., *J. Labelled Compd.* **1970**, *6*, 285-288.
4. Maitlis, P. M.; White, C., *J. Chem. Soc. A* **1971**, 3322-3326.
5. White, C.; Thompson, S. J.; Maitlis, P. M., *J. Chem. Soc. Dalton Trans.* **1977**, 1654-1661.
6. Shubin, V. G.; Berezina, R. N.; N., P. V., *J. Organomet. Chem.* **1973**, *54*, 239-246.
7. (a) Becke, A. D., *J. Chem. Phys.* **1993**, *98*, 5648-5652; (b) Lee, C. T.; Yang, W. T.; Parr, R. G., *Phys. Rev. B* **1988**, *37*, 785-789.
8. Zhao, Y.; Truhlar, D. G., *J. Chem. Phys.* **2006**, *125*, 194101.
9. Ribeiro, R. F.; Marenich, A. V.; Cramer, C. J.; Truhlar, D. G., *J. Phys. Chem. B* **2011**, *115*, 14556-14562.
10. (a) Liu, P.; Xu, X. F.; Dong, X. F.; Keitz, B. K.; Herbert, M. B.; Grubbs, R. H.; Houk, K. N., *J. Am. Chem. Soc.* **2012**, *134*, 1464-1467; (b) Lin, M.; Kang, G. Y.; Guo, Y. A.; Yu, Z. X., *J. Am. Chem. Soc.* **2012**, *134*, 398-405; (c) Hong, S. Y.; Park, Y.; Hwang, Y.; Kim, Y. B.; Baik, M. H.; Chang, S., *Science* **2018**, *359*, 1016-1021; (d) Gusev, D. G., *Organometallics* **2013**, *32*, 4239-4243; (e) Hopmann, K. H., *Organometallics* **2016**, *35*, 3795-3807.
11. Zhao, Y.; Truhlar, D. G., *Theor. Chem. Account.* **2008**, *120*, 215-241.
12. Gaussian 09, Revision E.01, Frisch, M. J.; Trucks, G. W.; Schlegel, H. B.; Scuseria, G. E.; Robb, M. A.; Cheeseman, J. R.; Scalmani, G.; Barone, V.; Mennucci, B.; Petersson, G. A.; Nakatsuji, H.; Caricato, M.; Li, X.; Hratchian, H. P.; Izmaylov, A. F.; Bloino, J.; Zheng, G.; Sonnenberg, J. L.; Hada, M.; Ehara, M.; Toyota, K.; Fukuda, R.; Hasegawa, J.; Ishida, M.; Nakajima, T.; Honda, Y.; Kitao, O.; Nakai, H.; Vreven, T.; Montgomery, J. A., Jr.; Peralta, J. E.; Ogliaro, F.; Bearpark, M.; Heyd, J. J.; Brothers, E.; Kudin, K. N.; Staroverov, V. N.; Kobayashi, R.; Normand, J.; Raghavachari, K.; Rendell, A.; Burant, J. C.; Iyengar, S. S.; Tomasi, J.; Cossi, M.; Rega, N.; Millam, J. M.; Klene, M.; Knox, J. E.; Cross, J. B.; Bakken, V.; Adamo, C.; Jaramillo, J.; Gomperts, R.; Stratmann, R. E.; Yazyev, O.; Austin, A. J.; Cammi, R.; Pomelli, C.; Ochterski, J. W.; Martin, R. L.; Morokuma, K.; Zakrzewski, V. G.; Voth, G. A.; Salvador, P.; Dannenberg, J. J.; Dapprich, S.; Daniels, A. D.; Farkas, Ö.; Foresman, J. B.; Ortiz, J. V.; Cioslowski, J.; Fox, D. J. Gaussian, Inc., Wallingford CT, 2015.
13. Dolomanov, O. V.; Bourhis, L. J.; Gildea, R. J.; Howard, J. A. K.; Puschmann, H., *J. Appl. Cryst.* **2009**, *42*, 339-341.
14. Sheldrick, G. M., *Acta Cryst. A* **2015**, *71*, 3-8.
15. Sheldrick, G. M., *Acta Cryst. C* **2015**, *71*, 3-8.
16. CrysAlisPRO, Oxford Diffraction /Agilent Technologies UK Ltd, Yarnton, England.
